# Supplementary material for: Genome-Wide Identification and Expression Analysis of AP2/ERF Transcription Factor Related to Drought Stress in Cultivated Peanut (Arachis hypogaea L.)
Source: Front Genet. 2021 Oct 13;12:750761. doi: 10.3389/fgene.2021.750761 (PMC8548641; doi:10.3389/fgene.2021.750761)
Supplement: Supplementary file 6 [file DataSheet1.xlsx]

## Sheet: Table S1
Supplementary Table S1. Primers used for qRT-PCR analysis
Gene names	Forward primer sequence (5'-3')	Reverse primer sequence (5'-3')	Product size (bp)
AhAP2-1	CCACGGTGATGATGATGAAG	AATTTCACGCCTACCCAGTG	206
AhAP2-6	TCGTTCCCTCTTTCACCAAC	ACCAAGGAAATCCGCTACCT	179
AhAP2-13	ACTCGTCGCAGAACCTCAGT	GCCTTCAGATCTTGGTGCTC	204
AhAP2-19	GGCAAGTCCAAGGTCATTGT	CGATCGATGGAGGGAAGTTA	158
AhAP2-37	ATTCGTGAAAGCAACGCTCT	ATGATGCTGCTGCATGAAAG	161
AhDREB-1	CAATTGGGTCATGAGGGTTC	GCAATGCGATTCTCTCTTCC	196
AhDREB-2	CTTGGCGATCAAAGGTGATT	ATCGTCATCACGCTCTTGTG	219
AhDREB-3	GGAAGTGATTCGTTGGAGGA	TTTCAGCAACCCACTTACCC	213
AhDREB-5	TCGATGGACAAGGATGATGA	ACTCCCACTGGAAAGGCTCT	165
AhDREB-8	GCGCAACATTAATGGGAGAT	CAAACCTTGCCACCAAGAAT	165
AhDREB-9	ATACGACGTCGCAGCCTACT	AGAGCTCCAGCAACCACACT	249
AhDREB-14	ACCTTCTCTCACCTGCCTCA	CTCATCCAAGCCACCGTTAT	204
AhDREB-18	AGATCCTCAACCACCACCAC	TTCAATAATGCCACCCCAAT	177
AhDREB-20	ATGATTCACCACCATCAGCA	TGAACACCTTCCACATCCAA	150
AhDREB-23	TACTTCCTCAAAGGCCGAAA	TTTCTCCCCAGAAATCATCG	240
AhDREB-33	CTTGAAGCCATGGAAGAAGG	GCAAAAGAACCAAGCCAGAG	155
AhDREB-4	GCAAAGGTGGACCACAGAAT	GGCCATACATGGTCTTTGCT	200
AhERF-4	ATCCGAGGAGCTTGCAGATA	TCGAAGCTCCAAAGGTTCAT	149
AhERF-7	CTCCTCCTCATCCTCATCCA	TGCTGCTGAGTCGATAATGG	153
AhERF-8	TCTGGTTGGGTACCTTCGAC	ACCATCGAGGGAAGAGGATT	243
AhERF-13	CCGCTCAAAGAAGACGATTC	TTGGCACCGAATGAAATACA	171
AhERF-43	GGGACACTACAGAGGGGTCA	CAGCACGTTCCTATGCTGAG	227
AhERF-46	GCAGAGATAAGGGACCCACA	TCTCATTGCCAAGACACTGC	198
AhERF-47	TCCGAAGAAGAACGGAGCTA	CCCTGCAAGTGATGATGATG	246
AhERF-49	CACATGATGATGATGCCACA	CAGCAGTGTCAAAGGTTCCA	210
AhERF-52	AATAAAACGGCAGCACCAAC	TCATCCTCTTTGCCCGTTAC	202
AhERF-57	GCAGAAACAACACCCAAGGT	TGTGAGATGGCGGATACAAA	153
AhERF-66	GGAACTGGCGAATTTGGTAA	GGTGGTTCGGAAGATGAAGA	220
AhERF-68	AGCAAGAGTTTGGCTTGGAA	CGAAAAACTGGTACGGGAGA	179
AhERF-69	GGAGATACCGGATTTGAGCA	TCAAAATCGAAATCGGGAAG	239
AhERF-72	TAACCATCAGCAGCAGCAAC	AGCTTCTTCCGCTGTTTGAA	213
AhERF-75	AGGAAACAAAGCCAAGCTCA	CCATGCTTCCATCATCACTG	154
AhRAV-1	CCAAGTGACGTGGGAAAACT	GTAACGAAACCGCCACACTT	170
AhRAV-2	CTTCAACGAGGAGGACGAAG	ACGATCTCGGACTTGGAATG	173
AhRAV-3	CCACATCGAAGAAGCTGTCA	CGCGTTGATGCTTCTCATAA	200

## Sheet: Table S2
Supplementary Table S2. Classification of AP2/ERF superfamily in A. hypogaea cv. Tifrunner.
Family	Gene ID	Remarks	HMM_Evalue
AP2 subfamily
	arahy.Tifrunner.gnm1.ann1.0SK1H1.1	single complete AP2 domain	3.1e-07
	arahy.Tifrunner.gnm1.ann1.5AD0HB.1	single complete AP2 domain	3.1e-09
	arahy.Tifrunner.gnm1.ann1.6MJ8Q6.1	single complete AP2 domain	1.3e-11
	arahy.Tifrunner.gnm1.ann1.AE6IJA.1	single complete AP2 domain	1.2e-11
	arahy.Tifrunner.gnm1.ann1.AE6IJA.2	single complete AP2 domain	1.7e-08
	arahy.Tifrunner.gnm1.ann1.HP6LSM.1	single complete AP2 domain	1.1e-08
	arahy.Tifrunner.gnm1.ann1.KDI7TH.1	single complete AP2 domain	1.3e-08
	arahy.Tifrunner.gnm1.ann1.L4Q0K2.1	two complete AP2 domain	3.7e-09
	arahy.Tifrunner.gnm1.ann1.M71NXQ.1	single complete AP2 domain	6.2e-09
	arahy.Tifrunner.gnm1.ann1.00XS3D.1	two complete AP2 domain	1.3e-18
	arahy.Tifrunner.gnm1.ann1.00XS3D.2	two complete AP2 domain	8.4e-19
	arahy.Tifrunner.gnm1.ann1.38RLY4.1	two complete AP2 domain	1.5e-18
	arahy.Tifrunner.gnm1.ann1.4G06NJ.1	two complete AP2 domain	9.3e-14
	arahy.Tifrunner.gnm1.ann1.4G06NJ.2	two complete AP2 domain	3.2e-10
	arahy.Tifrunner.gnm1.ann1.5MV2CV.1	single complete AP2 domain	1.6e-10
	arahy.Tifrunner.gnm1.ann1.6BK6B8.1	single complete AP2 domain	1.1e-10
	arahy.Tifrunner.gnm1.ann1.6BK6B8.2	single complete AP2 domain	1.1e-07
	arahy.Tifrunner.gnm1.ann1.6V99EA.1	two complete AP2 domain	1.2e-09
	arahy.Tifrunner.gnm1.ann1.7SA24Y.1	two complete AP2 domain	4.3e-09
	arahy.Tifrunner.gnm1.ann1.9T6609.1	two complete AP2 domain	2e-09
	arahy.Tifrunner.gnm1.ann1.F0M2KT.1	single complete AP2 domain	1.3e-10
	arahy.Tifrunner.gnm1.ann1.F5Q2PM.1	single complete AP2 domain	4.7e-09
	arahy.Tifrunner.gnm1.ann1.GP73H9.1	two complete AP2 domain	6e-08
	arahy.Tifrunner.gnm1.ann1.HG2532.1	two complete AP2 domain	1.2e-08
	arahy.Tifrunner.gnm1.ann1.HG2532.2	two complete AP2 domain	1.2e-08
	arahy.Tifrunner.gnm1.ann1.I3YYWX.1	single complete AP2 domain	5.6e-09
	arahy.Tifrunner.gnm1.ann1.J9H0YQ.1	two complete AP2 domain	1.1e-19
	arahy.Tifrunner.gnm1.ann1.K6QUG2.1	two complete AP2 domain	1.1e-17
	arahy.Tifrunner.gnm1.ann1.KP68JR.1	single complete AP2 domain	6.7e-12
	arahy.Tifrunner.gnm1.ann1.MRL478.1	two complete AP2 domain	1.6e-14
	arahy.Tifrunner.gnm1.ann1.MRL478.2	two complete AP2 domain	2.6e-18
	arahy.Tifrunner.gnm1.ann1.N9BW0I.1	two complete AP2 domain	6e-19
	arahy.Tifrunner.gnm1.ann1.N9UN2I.1	single complete AP2 domain	3.1e-06
	arahy.Tifrunner.gnm1.ann1.QEK7F9.1	two complete AP2 domain	1.1e-17
	arahy.Tifrunner.gnm1.ann1.RN6KV5.1	single complete AP2 domain	8.1e-06
	arahy.Tifrunner.gnm1.ann1.RN6KV5.2	single complete AP2 domain	8.1e-06
	arahy.Tifrunner.gnm1.ann1.RN6KV5.3	single complete AP2 domain	5e-08
	arahy.Tifrunner.gnm1.ann1.RWA9J9.1	two complete AP2 domain	6e-19
	arahy.Tifrunner.gnm1.ann1.TN1J43.1	two complete AP2 domain	3.9e-09
	arahy.Tifrunner.gnm1.ann1.ULX5CX.1	two complete AP2 domain	5.5e-09
	arahy.Tifrunner.gnm1.ann1.UU942A.1	two complete AP2 domain	5e-20
	arahy.Tifrunner.gnm1.ann1.UU942A.2	single complete AP2 domain	7.3e-13
	arahy.Tifrunner.gnm1.ann1.UVRI66.2	single complete AP2 domain	1.5e-10
	arahy.Tifrunner.gnm1.ann1.V8I50K.1	two complete AP2 domain	6e-08
	arahy.Tifrunner.gnm1.ann1.V8Z0W5.1	single complete AP2 domain	1.1e-09
	arahy.Tifrunner.gnm1.ann1.WU5RMI.1	single complete AP2 domain	7.4e-06
	arahy.Tifrunner.gnm1.ann1.WU5RMI.2	single complete AP2 domain	4.9e-08
	arahy.Tifrunner.gnm1.ann1.XI0ITM.1	two complete AP2 domain	4.5e-08
	arahy.Tifrunner.gnm1.ann1.Y9PZ1H.1	single complete AP2 domain	8.1e-09
	arahy.Tifrunner.gnm1.ann1.YSN9W3.1	single complete AP2 domain	3.8e-18
	arahy.Tifrunner.gnm1.ann1.YSN9W3.2	two complete AP2 domain	3.8e-18
	arahy.Tifrunner.gnm1.ann1.ZL8GWI.1	two complete AP2 domain	1.9e-09
	arahy.Tifrunner.gnm1.ann1.ETC6KF.1	single complete AP2 domain	6.7e-07
	arahy.Tifrunner.gnm1.ann1.QI820R.1	single complete AP2 domain	1.7e-08
	arahy.Tifrunner.gnm1.ann1.QI820R.2	single complete AP2 domain	1.7e-08
	arahy.Tifrunner.gnm1.ann1.4G06NJ.3	two complete AP2 domain	9.8e-12
	arahy.Tifrunner.gnm1.ann1.H1PWIN.1	single complete AP2 domain	5.5e-09
	arahy.Tifrunner.gnm1.ann1.H1PWIN.2	single complete AP2 domain	4.5e-09
	arahy.Tifrunner.gnm1.ann1.095TGF.2	single complete AP2 domain	5.2e-09
RAV subfamily
	arahy.Tifrunner.gnm1.ann1.PDF2MW.1	Single complete B3 domain with single completement AP2 domain	3e-08
	arahy.Tifrunner.gnm1.ann1.PZJ7B1.1	Single complete B3 domain with single completement AP2 domain	2.2e-07
	arahy.Tifrunner.gnm1.ann1.QDL5QZ.1	Single complete B3 domain with single completement AP2 domain	3e-08
	arahy.Tifrunner.gnm1.ann1.R3D0LA.1	Single complete B3 domain with single completement AP2 domain	5e-07
Soloist subfamily
	arahy.Tifrunner.gnm1.ann1.20QC9Q.1	single complete AP2 domain	2e-13
	arahy.Tifrunner.gnm1.ann1.L32FWB.1	single complete AP2 domain	2.1e-11
	arahy.Tifrunner.gnm1.ann1.RCQ4HC.1	single complete AP2 domain	3.3e-13
	arahy.Tifrunner.gnm1.ann1.T9WCKL.1	single complete AP2 domain	9.4e-14
	arahy.Tifrunner.gnm1.ann1.ZH29RS.1	single complete AP2 domain	2.2e-11
CBF/DREB subfamily
	arahy.Tifrunner.gnm1.ann1.452FBF.1	single complete AP2 domain	7.8e-12
	arahy.Tifrunner.gnm1.ann1.FAI7YU.1	single complete AP2 domain	7.8e-12
	arahy.Tifrunner.gnm1.ann1.K6GECI.1	single complete AP2 domain	3.8e-11
	arahy.Tifrunner.gnm1.ann1.VUU22W.1	single complete AP2 domain	3.8e-11
	arahy.Tifrunner.gnm1.ann1.9V08HM.1	single complete AP2 domain	9.3e-12
	arahy.Tifrunner.gnm1.ann1.X2S259.1	single complete AP2 domain	1.4e-11
	arahy.Tifrunner.gnm1.ann1.YAEJ5M.1	single complete AP2 domain	9.3e-12
	arahy.Tifrunner.gnm1.ann1.GS7VU5.1	single complete AP2 domain	2.2e-11
	arahy.Tifrunner.gnm1.ann1.PSKQ19.1	single complete AP2 domain	1.1e-11
	arahy.Tifrunner.gnm1.ann1.X9M6WH.1	single complete AP2 domain	7.3e-12
	arahy.Tifrunner.gnm1.ann1.LCR0LC.1	single complete AP2 domain	8.9e-07
	arahy.Tifrunner.gnm1.ann1.0IM2G4.1	single complete AP2 domain	1.8e-07
	arahy.Tifrunner.gnm1.ann1.RJA1IC.1	single complete AP2 domain	1.8e-07
	arahy.Tifrunner.gnm1.ann1.JE3RIW.1	single complete AP2 domain	2.2e-07
	arahy.Tifrunner.gnm1.ann1.47NS3A.1	single complete AP2 domain	1.6e-10
	arahy.Tifrunner.gnm1.ann1.VJ8B3Q.1	single complete AP2 domain	4.5e-08
	arahy.Tifrunner.gnm1.ann1.WP3ECB.1	single complete AP2 domain	1.9e-12
	arahy.Tifrunner.gnm1.ann1.XJX19T.1	single complete AP2 domain	1.9e-11
	arahy.Tifrunner.gnm1.ann1.17GHQZ.1	single complete AP2 domain	1.3e-10
	arahy.Tifrunner.gnm1.ann1.301SU2.1	single complete AP2 domain	5.1e-13
	arahy.Tifrunner.gnm1.ann1.B20XFZ.1	single complete AP2 domain	5.2e-13
	arahy.Tifrunner.gnm1.ann1.15RNTX.1	single complete AP2 domain	3e-12
	arahy.Tifrunner.gnm1.ann1.5KI8FH.1	single complete AP2 domain	9.3e-12
	arahy.Tifrunner.gnm1.ann1.73DHZN.1	single complete AP2 domain	9e-12
	arahy.Tifrunner.gnm1.ann1.L5HMHT.1	single complete AP2 domain	4.1e-12
	arahy.Tifrunner.gnm1.ann1.KD4831.1	single complete AP2 domain	4.8e-12
	arahy.Tifrunner.gnm1.ann1.SE8WTS.1	single complete AP2 domain	4.8e-12
	arahy.Tifrunner.gnm1.ann1.KQL0FY.1	single complete AP2 domain	5.7e-11
	arahy.Tifrunner.gnm1.ann1.U8GE9Q.1	single complete AP2 domain	1.6e-09
	arahy.Tifrunner.gnm1.ann1.2N75TD.1	single complete AP2 domain	1.2e-10
	arahy.Tifrunner.gnm1.ann1.X9ZZC1.1	single complete AP2 domain	2.7e-10
	arahy.Tifrunner.gnm1.ann1.2YN4P9.1	single complete AP2 domain	3.7e-11
	arahy.Tifrunner.gnm1.ann1.JRIM60.1	single complete AP2 domain	3.6e-11
	arahy.Tifrunner.gnm1.ann1.MMJQ7K.1	single complete AP2 domain	4.2e-05
	arahy.Tifrunner.gnm1.ann1.VHG0QP.1	single complete AP2 domain	1e-10
	arahy.Tifrunner.gnm1.ann1.3D7MPL.1	single complete AP2 domain	2.4e-10
	arahy.Tifrunner.gnm1.ann1.KDEH1Y.1	single complete AP2 domain	2.4e-10
	arahy.Tifrunner.gnm1.ann1.8V3MXA.1	single complete AP2 domain	2.2e-11
	arahy.Tifrunner.gnm1.ann1.P2AB97.1	single complete AP2 domain	1.9e-11
	arahy.Tifrunner.gnm1.ann1.CSV6ZK.1	single complete AP2 domain	3e-11
	arahy.Tifrunner.gnm1.ann1.DIZB8V.1	single complete AP2 domain	3e-11
ERF subfamily
	arahy.Tifrunner.gnm1.ann1.3WAX0M.1	single complete AP2 domain	1e-10
	arahy.Tifrunner.gnm1.ann1.J6K2KY.1	single complete AP2 domain	9.6e-11
	arahy.Tifrunner.gnm1.ann1.N4EN9H.1	single complete AP2 domain	2.4e-12
	arahy.Tifrunner.gnm1.ann1.Q66BD2.1	single complete AP2 domain	2.1e-11
	arahy.Tifrunner.gnm1.ann1.Y7XFN8.1	single complete AP2 domain	9.6e-13
	arahy.Tifrunner.gnm1.ann1.G0YQ1S.1	single complete AP2 domain	9.5e-13
	arahy.Tifrunner.gnm1.ann1.8UYF3G.1	single complete AP2 domain	6.1e-10
	arahy.Tifrunner.gnm1.ann1.H1793N.1	single complete AP2 domain	2.6e-10
	arahy.Tifrunner.gnm1.ann1.WBA6PF.1	single complete AP2 domain	5.7e-10
	arahy.Tifrunner.gnm1.ann1.804PS6.1	single complete AP2 domain	8.9e-11
	arahy.Tifrunner.gnm1.ann1.PSW8JM.1	single complete AP2 domain	9e-11
	arahy.Tifrunner.gnm1.ann1.4E6KYK.1	single complete AP2 domain	3e-11
	arahy.Tifrunner.gnm1.ann1.PE2T0M.1	single complete AP2 domain	7.4e-11
	arahy.Tifrunner.gnm1.ann1.2RQ41J.1	single complete AP2 domain	1.5e-11
	arahy.Tifrunner.gnm1.ann1.K3BVMJ.1	single complete AP2 domain	1.5e-11
	arahy.Tifrunner.gnm1.ann1.C5BSUS.1	single complete AP2 domain	2.5e-09
	arahy.Tifrunner.gnm1.ann1.ZQ3898.1	single complete AP2 domain	2.5e-09
	arahy.Tifrunner.gnm1.ann1.WPAQ8S.1	single complete AP2 domain	9.2e-14
	arahy.Tifrunner.gnm1.ann1.57AKVM.1	single complete AP2 domain	1.7e-12
	arahy.Tifrunner.gnm1.ann1.ILN3K9.1	single complete AP2 domain	1.8e-12
	arahy.Tifrunner.gnm1.ann1.4AG551.1	single complete AP2 domain	1.1e-12
	arahy.Tifrunner.gnm1.ann1.KB746A.1	single complete AP2 domain	5.6e-12
	arahy.Tifrunner.gnm1.ann1.HGAZ7D.1	single complete AP2 domain	1.5e-13
	arahy.Tifrunner.gnm1.ann1.L00VS1.1	single complete AP2 domain	2e-13
	arahy.Tifrunner.gnm1.ann1.AS0C7C.1	single complete AP2 domain	6.3e-13
	arahy.Tifrunner.gnm1.ann1.QGFJ76.1	single complete AP2 domain	6.3e-13
	arahy.Tifrunner.gnm1.ann1.8ZPK8F.1	single complete AP2 domain	3.9e-12
	arahy.Tifrunner.gnm1.ann1.JEZR1W.1	single complete AP2 domain	3.9e-12
	arahy.Tifrunner.gnm1.ann1.DU9C9C.1	single complete AP2 domain	7.8e-12
	arahy.Tifrunner.gnm1.ann1.F0BU8J.1	single complete AP2 domain	7.8e-12
	arahy.Tifrunner.gnm1.ann1.DY3CW6.1	single complete AP2 domain	1.2e-11
	arahy.Tifrunner.gnm1.ann1.RX34PI.1	single complete AP2 domain	1.2e-11
	arahy.Tifrunner.gnm1.ann1.J0DG7J.1	single complete AP2 domain	5.5e-12
	arahy.Tifrunner.gnm1.ann1.VG3SGX.1	single complete AP2 domain	3.4e-12
	arahy.Tifrunner.gnm1.ann1.5I2TXN.1	single complete AP2 domain	2.2e-14
	arahy.Tifrunner.gnm1.ann1.ARVN7W.1	single complete AP2 domain	2.2e-14
	arahy.Tifrunner.gnm1.ann1.E9BLTS.1	single complete AP2 domain	1.4e-12
	arahy.Tifrunner.gnm1.ann1.I2ZHTU.1	single complete AP2 domain	1.5e-12
	arahy.Tifrunner.gnm1.ann1.88B2ED.4	single complete AP2 domain	3.1e-12
	arahy.Tifrunner.gnm1.ann1.2Q12N5.1	single complete AP2 domain	3.1e-13
	arahy.Tifrunner.gnm1.ann1.B66PX0.1	single complete AP2 domain	3.3e-13
	arahy.Tifrunner.gnm1.ann1.0UF999.1	single complete AP2 domain	2.5e-13
	arahy.Tifrunner.gnm1.ann1.WDSQ8J.1	single complete AP2 domain	2.6e-13
	arahy.Tifrunner.gnm1.ann1.2Y0GDL.1	single complete AP2 domain	1.2e-13
	arahy.Tifrunner.gnm1.ann1.P2THRP.1	single complete AP2 domain	4.9e-14
	arahy.Tifrunner.gnm1.ann1.2AHI7R.1	single complete AP2 domain	6.3e-12
	arahy.Tifrunner.gnm1.ann1.F2D5GR.1	single complete AP2 domain	6.2e-12
	arahy.Tifrunner.gnm1.ann1.768P1R.1	single complete AP2 domain	1.5e-13
	arahy.Tifrunner.gnm1.ann1.768P1R.2	single complete AP2 domain	1.3e-13
	arahy.Tifrunner.gnm1.ann1.EZ5RGK.1	single complete AP2 domain	1.2e-13
	arahy.Tifrunner.gnm1.ann1.GIJ59W.1	single complete AP2 domain	3.1e-13
	arahy.Tifrunner.gnm1.ann1.45NR7C.1	single complete AP2 domain	2.5e-12
	arahy.Tifrunner.gnm1.ann1.45NR7C.3	single complete AP2 domain	1.2e-12
	arahy.Tifrunner.gnm1.ann1.ER44IM.1	single complete AP2 domain	1.4e-12
	arahy.Tifrunner.gnm1.ann1.0PYI42.1	single complete AP2 domain	4.4e-12
	arahy.Tifrunner.gnm1.ann1.DRB5KP.1	single complete AP2 domain	1.8e-11
	arahy.Tifrunner.gnm1.ann1.GP7L65.1	single complete AP2 domain	1.5e-11
	arahy.Tifrunner.gnm1.ann1.MMX4MC.1	single complete AP2 domain	1.2e-10
	arahy.Tifrunner.gnm1.ann1.ZJ433C.1	single complete AP2 domain	1.2e-10
	arahy.Tifrunner.gnm1.ann1.ZJ433C.2	single complete AP2 domain	1.2e-10
	arahy.Tifrunner.gnm1.ann1.GGDF5U.1	single complete AP2 domain	2.8e-10
	arahy.Tifrunner.gnm1.ann1.VF7WU9.1	single complete AP2 domain	2.8e-10
	arahy.Tifrunner.gnm1.ann1.4XS3FZ.1	single complete AP2 domain	5.6e-13
	arahy.Tifrunner.gnm1.ann1.ZW7540.1	single complete AP2 domain	5.6e-13
	arahy.Tifrunner.gnm1.ann1.BDR3J7.1	single complete AP2 domain	3.6e-13
	arahy.Tifrunner.gnm1.ann1.C7A6P7.1	single complete AP2 domain	9.6e-13
	arahy.Tifrunner.gnm1.ann1.87AL67.1	single complete AP2 domain	3.3e-11
	arahy.Tifrunner.gnm1.ann1.KF0N62.1	single complete AP2 domain	3.5e-11
	arahy.Tifrunner.gnm1.ann1.FU6CIC.1	single complete AP2 domain	4e-13
	arahy.Tifrunner.gnm1.ann1.JGE7BU.1	single complete AP2 domain	4e-13
	arahy.Tifrunner.gnm1.ann1.LF78J6.1	single complete AP2 domain	4.3e-13
	arahy.Tifrunner.gnm1.ann1.QR2UB9.1	single complete AP2 domain	7.3e-12
	arahy.Tifrunner.gnm1.ann1.EAK3RU.1	single complete AP2 domain	7.2e-14
	arahy.Tifrunner.gnm1.ann1.T22KDW.1	single complete AP2 domain	1.2e-13
	arahy.Tifrunner.gnm1.ann1.L5Q3AX.1	single complete AP2 domain	2.6e-13
	arahy.Tifrunner.gnm1.ann1.L65DKI.1	single complete AP2 domain	1.5e-13

## Sheet: Table S3
Supplementary Table S3. Physical locations and properties of AP2/ERF superfamily members on A. hypogaea cv. Tifrunner. genome.
Gene name	Gene ID	Chromosome	Start	End	Translation direction	Theoretical pI	Molecular weight(Da)	Amino acids length	Grand average of hydropathicity (GRAVY)	Subcellar localization
AhAP2-37	arahy.Tifrunner.gnm1.ann1.L4Q0K2.1	arahy.Tifrunner.gnm1.Arahy.13	5867384	5870065	-	5.74	55291.2	496	-0.864	Cytoplasm. Nucleus
AhAP2-6	arahy.Tifrunner.gnm1.ann1.TN1J43.1	arahy.Tifrunner.gnm1.Arahy.03	3484371	3486934	-	5.79	55916.9	581	-0.841	Cytoplasm. Nucleus
AhAP2-10	arahy.Tifrunner.gnm1.ann1.6BK6B8.1	arahy.Tifrunner.gnm1.Arahy.04	119615071	119619501	-	6.1	77952.7	713	-0.719	Cytoplasm. Nucleus
AhAP2-11	arahy.Tifrunner.gnm1.ann1.6BK6B8.2	arahy.Tifrunner.gnm1.Arahy.04	119615071	119619450	-	6.1	77577.2	710	-0.732	Cytoplasm. Nucleus
AhAP2-3	arahy.Tifrunner.gnm1.ann1.5AD0HB.1	arahy.Tifrunner.gnm1.Arahy.01	96029742	96033221	-	6.01	47106.8	439	-0.554	Cytoplasm. Nucleus
AhAP2-35	arahy.Tifrunner.gnm1.ann1.XI0ITM.1	arahy.Tifrunner.gnm1.Arahy.11	148034038	148037544	+	8.46	50370	466	-0.486	Nucleus
AhAP2-40	arahy.Tifrunner.gnm1.ann1.HP6LSM.1	arahy.Tifrunner.gnm1.Arahy.14	133677942	133682708	-	6.05	71873.6	665	-0.752	Cytoplasm. Nucleus
AhAP2-23	arahy.Tifrunner.gnm1.ann1.ETC6KF.1	arahy.Tifrunner.gnm1.Arahy.08	26642978	26645700	+	5.99	49161	447	-0.842	Nucleus
AhAP2-42	arahy.Tifrunner.gnm1.ann1.N9BW0I.1	arahy.Tifrunner.gnm1.Arahy.15	414645	420767	+	6.53	56286	518	-0.54	Cytoplasm. Nucleus
AhAP2-13	arahy.Tifrunner.gnm1.ann1.RWA9J9.1	arahy.Tifrunner.gnm1.Arahy.05	414645	420767	+	6.53	56286	518	-0.54	Cytoplasm. Nucleus
AhAP2-7	arahy.Tifrunner.gnm1.ann1.RN6KV5.3	arahy.Tifrunner.gnm1.Arahy.03	132166627	132171261	-	5.45	40043.4	364	-0.521	Cytoplasm. Nucleus
AhAP2-39	arahy.Tifrunner.gnm1.ann1.WU5RMI.2	arahy.Tifrunner.gnm1.Arahy.13	134624410	134629029	-	5.27	39574.8	361	-0.5	Cytoplasm. Nucleus
AhAP2-38	arahy.Tifrunner.gnm1.ann1.WU5RMI.1	arahy.Tifrunner.gnm1.Arahy.13	134624322	134629029	-	5.43	40299.7	368	-0.484	Cytoplasm. Nucleus
AhAP2-9	arahy.Tifrunner.gnm1.ann1.RN6KV5.1	arahy.Tifrunner.gnm1.Arahy.03	132167064	132171261	-	5.61	40768.2	371	-0.505	Cytoplasm. Nucleus
AhAP2-8	arahy.Tifrunner.gnm1.ann1.RN6KV5.2	arahy.Tifrunner.gnm1.Arahy.03	132166627	132171261	-	5.61	40768.2	371	-0.505	Cytoplasm. Nucleus
AhAP2-58	arahy.Tifrunner.gnm1.ann1.GP73H9.1	arahy.Tifrunner.gnm1.Arahy.19	16386471	16393474	-	6.03	59684.8	537	-0.99	Cytoplasm. Nucleus
AhAP2-27	arahy.Tifrunner.gnm1.ann1.V8I50K.1	arahy.Tifrunner.gnm1.Arahy.09	12453064	12459808	-	6	59665.8	537	-0.983	Cytoplasm. Nucleus
AhAP2-52	arahy.Tifrunner.gnm1.ann1.J9H0YQ.1	arahy.Tifrunner.gnm1.Arahy.17	133966483	133970429	-	6.72	64712.7	581	-0.76	Cytoplasm. Nucleus
AhAP2-21	arahy.Tifrunner.gnm1.ann1.9T6609.1	arahy.Tifrunner.gnm1.Arahy.06	112142636	112147881	-	6.43	82535.9	738	-0.941	Cytoplasm. Nucleus
AhAP2-51	arahy.Tifrunner.gnm1.ann1.ZL8GWI.1	arahy.Tifrunner.gnm1.Arahy.16	151173726	151178851	-	6.33	81327.5	730	-0.929	Cytoplasm. Nucleus
AhAP2-22	arahy.Tifrunner.gnm1.ann1.7SA24Y.1	arahy.Tifrunner.gnm1.Arahy.08	17533005	17536661	-	6.5	60538.3	544	-0.688	Cytoplasm. Nucleus
AhAP2-2	arahy.Tifrunner.gnm1.ann1.M71NXQ.1	arahy.Tifrunner.gnm1.Arahy.01	22752359	22758481	+	5.97	61954.8	560	-0.559	Cytoplasm. Nucleus
AhAP2-31	arahy.Tifrunner.gnm1.ann1.ULX5CX.1	arahy.Tifrunner.gnm1.Arahy.11	29751754	29757840	-	5.99	62564.5	566	-0.563	Cytoplasm. Nucleus
AhAP2-43	arahy.Tifrunner.gnm1.ann1.6V99EA.1	arahy.Tifrunner.gnm1.Arahy.15	6507024	6510677	-	7.35	59335.5	525	-0.72	Cytoplasm. Nucleus
AhAP2-14	arahy.Tifrunner.gnm1.ann1.V8Z0W5.1	arahy.Tifrunner.gnm1.Arahy.05	6856747	6860249	+	7.73	59033.3	524	-0.678	Cytoplasm. Nucleus
AhAP2-59	arahy.Tifrunner.gnm1.ann1.5MV2CV.1	arahy.Tifrunner.gnm1.Arahy.20	132806236	132809264	-	7.79	42762.7	372	-0.926	Cytoplasm. Nucleus
AhAP2-28	arahy.Tifrunner.gnm1.ann1.F0M2KT.1	arahy.Tifrunner.gnm1.Arahy.10	107666908	107669928	-	8.37	39419.9	343	-0.935	Cytoplasm
AhAP2-12	arahy.Tifrunner.gnm1.ann1.F5Q2PM.1	arahy.Tifrunner.gnm1.Arahy.04	122118770	122121716	+	5.58	39373.7	342	-0.885	Nucleus
AhAP2-41	arahy.Tifrunner.gnm1.ann1.I3YYWX.1	arahy.Tifrunner.gnm1.Arahy.14	136511569	136514306	+	5.92	39915.2	347	-0.916	Cytoplasm. Nucleus
AhAP2-25	arahy.Tifrunner.gnm1.ann1.UVRI66.2	arahy.Tifrunner.gnm1.Arahy.08	45710208	45721482	-	5.95	37022.8	328	-0.931	Cytoplasm. Nucleus
AhAP2-57	arahy.Tifrunner.gnm1.ann1.QI820R.2	arahy.Tifrunner.gnm1.Arahy.18	127403938	127414836	-	10.58	14610.3	127	-1.324	Cytoplasm. Nucleus
AhAP2-56	arahy.Tifrunner.gnm1.ann1.QI820R.1	arahy.Tifrunner.gnm1.Arahy.18	127403938	127414836	-	10.58	14610.3	127	-1.324	Cytoplasm. Nucleus
AhAP2-47	arahy.Tifrunner.gnm1.ann1.UU942A.1	arahy.Tifrunner.gnm1.Arahy.15	32463332	32473037	+	8.7	40331.8	354	-0.846	Cytoplasm. Nucleus
AhAP2-48	arahy.Tifrunner.gnm1.ann1.UU942A.2	arahy.Tifrunner.gnm1.Arahy.15	32463332	32473037	+	9.41	31866.5	277	-0.921	Cytoplasm
AhAP2-49	arahy.Tifrunner.gnm1.ann1.6MJ8Q6.1	arahy.Tifrunner.gnm1.Arahy.16	8126548	8129823	+	9.29	57071.7	508	-0.637	Cytoplasm. Nucleus
AhAP2-17	arahy.Tifrunner.gnm1.ann1.AE6IJA.1	arahy.Tifrunner.gnm1.Arahy.06	11621126	11624419	-	9.28	55214.4	492	-0.695	Cytoplasm. Nucleus
AhAP2-18	arahy.Tifrunner.gnm1.ann1.AE6IJA.2	arahy.Tifrunner.gnm1.Arahy.06	11622756	11624419	-	9.76	21614.3	193	-0.855	Cytoplasm
AhAP2-26	arahy.Tifrunner.gnm1.ann1.Y9PZ1H.1	arahy.Tifrunner.gnm1.Arahy.09	400380	406170	-	5.52	36210.8	319	-0.95	Cytoplasm. Nucleus
AhAP2-34	arahy.Tifrunner.gnm1.ann1.HG2532.1	arahy.Tifrunner.gnm1.Arahy.11	147112672	147115635	+	5.97	42674.5	372	-1.035	Cytoplasm. Nucleus
AhAP2-33	arahy.Tifrunner.gnm1.ann1.HG2532.2	arahy.Tifrunner.gnm1.Arahy.11	147112601	147115635	+	5.97	42674.5	372	-1.035	Cytoplasm. Nucleus
AhAP2-4	arahy.Tifrunner.gnm1.ann1.KP68JR.1	arahy.Tifrunner.gnm1.Arahy.01	97178872	97181822	-	5.89	41000.7	360	-1.003	Cytoplasm. Nucleus
AhAP2-32	arahy.Tifrunner.gnm1.ann1.0SK1H1.1	arahy.Tifrunner.gnm1.Arahy.11	113068348	113072440	-	10.11	26299.8	227	-0.382	Nucleus
AhAP2-29	arahy.Tifrunner.gnm1.ann1.H1PWIN.1	arahy.Tifrunner.gnm1.Arahy.11	20264007	20270167	-	8.28	36791.8	330	-0.808	Nucleus
AhAP2-5	arahy.Tifrunner.gnm1.ann1.K6QUG2.1	arahy.Tifrunner.gnm1.Arahy.03	2284303	2288329	-	7.61	53560.4	486	-0.613	Cytoplasm. Nucleus
AhAP2-36	arahy.Tifrunner.gnm1.ann1.QEK7F9.1	arahy.Tifrunner.gnm1.Arahy.13	4028297	4032342	-	7.61	53445.3	486	-0.585	Nucleus
AhAP2-50	arahy.Tifrunner.gnm1.ann1.38RLY4.1	arahy.Tifrunner.gnm1.Arahy.16	36699136	36703119	-	5.92	51359.8	466	-0.565	Nucleus
AhAP2-44	arahy.Tifrunner.gnm1.ann1.4G06NJ.1	arahy.Tifrunner.gnm1.Arahy.15	7941002	7944524	+	6.26	53829.2	496	-0.757	Cytoplasm. Nucleus
AhAP2-45	arahy.Tifrunner.gnm1.ann1.4G06NJ.2	arahy.Tifrunner.gnm1.Arahy.15	7941002	7944524	+	6.43	57037	523	-0.677	Cytoplasm. Nucleus
AhAP2-55	arahy.Tifrunner.gnm1.ann1.N9UN2I.1	arahy.Tifrunner.gnm1.Arahy.18	110566904	110569079	+	6.89	21406.2	193	-0.389	Cytoplasm
AhAP2-46	arahy.Tifrunner.gnm1.ann1.4G06NJ.3	arahy.Tifrunner.gnm1.Arahy.15	7941637	7944524	+	7.35	38114.4	345	-0.639	Cytoplasm. Nucleus
AhAP2-15	arahy.Tifrunner.gnm1.ann1.00XS3D.1	arahy.Tifrunner.gnm1.Arahy.05	7862831	7866802	+	6.58	55209.8	505	-0.757	Cytoplasm. Nucleus
AhAP2-16	arahy.Tifrunner.gnm1.ann1.00XS3D.2	arahy.Tifrunner.gnm1.Arahy.05	7862831	7866802	+	6.29	47528	438	-0.771	Cytoplasm. Nucleus
AhAP2-30	arahy.Tifrunner.gnm1.ann1.H1PWIN.2	arahy.Tifrunner.gnm1.Arahy.11	20268048	20270163	-	4.75	30755.2	277	-0.985	Cytoplasm. Nucleus
AhAP2-1	arahy.Tifrunner.gnm1.ann1.095TGF.2	arahy.Tifrunner.gnm1.Arahy.01	15829466	15831568	-	4.79	30764.1	277	-0.986	Cytoplasm. Nucleus
AhAP2-19	arahy.Tifrunner.gnm1.ann1.MRL478.1	arahy.Tifrunner.gnm1.Arahy.06	24785815	24789450	-	5.62	51571.9	470	-0.564	Nucleus
AhAP2-20	arahy.Tifrunner.gnm1.ann1.MRL478.2	arahy.Tifrunner.gnm1.Arahy.06	24785815	24789450	-	5.62	51046.3	466	-0.563	Nucleus
AhAP2-24	arahy.Tifrunner.gnm1.ann1.KDI7TH.1	arahy.Tifrunner.gnm1.Arahy.08	28092101	28097549	+	6.65	51549.1	473	-0.553	Cytoplasm. Nucleus
AhAP2-53	arahy.Tifrunner.gnm1.ann1.YSN9W3.1	arahy.Tifrunner.gnm1.Arahy.18	3935652	3941162	+	6.93	53848.4	492	-0.68	Nucleus
AhAP2-54	arahy.Tifrunner.gnm1.ann1.YSN9W3.2	arahy.Tifrunner.gnm1.Arahy.18	3935652	3940770	+	6.93	53848.4	492	-0.68	Nucleus
AhRAV-1	arahy.Tifrunner.gnm1.ann1.PDF2MW.1	arahy.Tifrunner.gnm1.Arahy.05	109809572	109810819	-	9.07	44750.3	415	-0.48	Nucleus
AhRAV-3	arahy.Tifrunner.gnm1.ann1.QDL5QZ.1	arahy.Tifrunner.gnm1.Arahy.15	120808738	120809985	+	9.07	44736.3	415	-0.48	Nucleus
AhRAV-4	arahy.Tifrunner.gnm1.ann1.PZJ7B1.1	arahy.Tifrunner.gnm1.Arahy.19	141872251	141873706	-	8.99	45851.5	422	-0.639	Nucleus
AhRAV-2	arahy.Tifrunner.gnm1.ann1.R3D0LA.1	arahy.Tifrunner.gnm1.Arahy.09	120373571	120376679	+	8.02	44135.3	406	-0.67	Nucleus
AhSoloist-3	arahy.Tifrunner.gnm1.ann1.T9WCKL.1	arahy.Tifrunner.gnm1.Arahy.10	109234206	109235360	+	4.64	42589.1	384	-0.563	Nucleus
AhSoloist-4	arahy.Tifrunner.gnm1.ann1.20QC9Q.1	arahy.Tifrunner.gnm1.Arahy.14	125966494	125968380	-	8.58	39049.4	354	-0.926	Cytoplasm. Nucleus
AhSoloist-1	arahy.Tifrunner.gnm1.ann1.RCQ4HC.1	arahy.Tifrunner.gnm1.Arahy.04	114373350	114375269	-	7.78	41501.1	377	-0.906	Cytoplasm. Nucleus
AhSoloist-2	arahy.Tifrunner.gnm1.ann1.L32FWB.1	arahy.Tifrunner.gnm1.Arahy.10	1227333	1228439	+	6.45	40189	368	-0.702	Nucleus
AhSoloist-5	arahy.Tifrunner.gnm1.ann1.ZH29RS.1	arahy.Tifrunner.gnm1.Arahy.20	3203151	3204254	+	6.45	39975.8	367	-0.669	Nucleus
AhDREB-14	arahy.Tifrunner.gnm1.ann1.8V3MXA.1	arahy.Tifrunner.gnm1.Arahy.07	80629752	80630809	-	9.35	25848.2	232	-0.561	Nucleus
AhDREB-36	arahy.Tifrunner.gnm1.ann1.P2AB97.1	arahy.Tifrunner.gnm1.Arahy.18	488770	489737	+	9.02	23607.5	213	-0.568	Nucleus
AhDREB-1	arahy.Tifrunner.gnm1.ann1.CSV6ZK.1	arahy.Tifrunner.gnm1.Arahy.01	106486240	106487924	+	7.13	26539.5	241	-0.618	Nucleus
AhDREB-26	arahy.Tifrunner.gnm1.ann1.DIZB8V.1	arahy.Tifrunner.gnm1.Arahy.13	43668419	43670419	+	8.39	26561.6	243	-0.576	Nucleus
AhDREB-16	arahy.Tifrunner.gnm1.ann1.3D7MPL.1	arahy.Tifrunner.gnm1.Arahy.08	47029455	47030928	-	8.82	28856.6	257	-1.067	Nucleus
AhDREB-40	arahy.Tifrunner.gnm1.ann1.KDEH1Y.1	arahy.Tifrunner.gnm1.Arahy.18	129951622	129953089	-	8.82	28366	253	-1.054	Nucleus
AhDREB-18	arahy.Tifrunner.gnm1.ann1.VHG0QP.1	arahy.Tifrunner.gnm1.Arahy.09	855027	856228	+	7.05	23893.6	214	-0.721	Nucleus
AhDREB-21	arahy.Tifrunner.gnm1.ann1.MMJQ7K.1	arahy.Tifrunner.gnm1.Arahy.10	93305988	93306509	+	7.69	19945.5	173	-0.814	Nucleus
AhDREB-34	arahy.Tifrunner.gnm1.ann1.2YN4P9.1	arahy.Tifrunner.gnm1.Arahy.16	148054823	148056189	+	7.8	23106.8	200	-0.923	Nucleus
AhDREB-11	arahy.Tifrunner.gnm1.ann1.JRIM60.1	arahy.Tifrunner.gnm1.Arahy.06	109565156	109566397	+	7.8	23255.9	202	-0.911	Nucleus
AhDREB-28	arahy.Tifrunner.gnm1.ann1.2N75TD.1	arahy.Tifrunner.gnm1.Arahy.14	112854344	112856467	-	5.64	39006.9	353	-0.725	Cytoplasm
AhDREB-17	arahy.Tifrunner.gnm1.ann1.X9ZZC1.1	arahy.Tifrunner.gnm1.Arahy.08	47160111	47162179	-	5.33	31847.7	288	-0.784	Cytoplasm. Nucleus
AhDREB-27	arahy.Tifrunner.gnm1.ann1.KQL0FY.1	arahy.Tifrunner.gnm1.Arahy.14	112701282	112703466	-	5.41	39479.3	355	-0.708	Cytoplasm. Nucleus
AhDREB-4	arahy.Tifrunner.gnm1.ann1.U8GE9Q.1	arahy.Tifrunner.gnm1.Arahy.04	103005282	103006317	-	5.83	35108.3	310	-0.791	Cytoplasm. Nucleus
AhDREB-25	arahy.Tifrunner.gnm1.ann1.KD4831.1	arahy.Tifrunner.gnm1.Arahy.12	106325716	106328110	-	4.83	55222.8	492	-0.893	Cytoplasm. Nucleus
AhDREB-3	arahy.Tifrunner.gnm1.ann1.SE8WTS.1	arahy.Tifrunner.gnm1.Arahy.02	91765000	91767274	-	4.7	55009.3	491	-0.919	Cytoplasm. Nucleus
AhDREB-39	arahy.Tifrunner.gnm1.ann1.L5HMHT.1	arahy.Tifrunner.gnm1.Arahy.18	8822894	8823409	+	9.51	18289.4	171	-0.745	Nucleus
AhDREB-35	arahy.Tifrunner.gnm1.ann1.5KI8FH.1	arahy.Tifrunner.gnm1.Arahy.17	9932157	9933686	+	4.77	46809.6	425	-0.762	Nucleus
AhDREB-12	arahy.Tifrunner.gnm1.ann1.73DHZN.1	arahy.Tifrunner.gnm1.Arahy.07	7805280	7807646	+	4.89	45459.9	413	-0.838	Nucleus
AhDREB-15	arahy.Tifrunner.gnm1.ann1.15RNTX.1	arahy.Tifrunner.gnm1.Arahy.08	1473987	1474718	+	8.28	26576.9	243	-0.481	Nucleus
AhDREB-32	arahy.Tifrunner.gnm1.ann1.301SU2.1	arahy.Tifrunner.gnm1.Arahy.16	1009157	1011667	-	6.22	29053.6	258	-0.721	Nucleus
AhDREB-10	arahy.Tifrunner.gnm1.ann1.B20XFZ.1	arahy.Tifrunner.gnm1.Arahy.06	18483543	18485914	+	8.37	29491.2	261	-0.704	Nucleus
AhDREB-33	arahy.Tifrunner.gnm1.ann1.WP3ECB.1	arahy.Tifrunner.gnm1.Arahy.16	7501710	7502561	-	5.6	31839.5	283	-0.804	Nucleus
AhDREB-13	arahy.Tifrunner.gnm1.ann1.XJX19T.1	arahy.Tifrunner.gnm1.Arahy.07	8231560	8232651	+	6.39	40221.4	363	-0.995	Nucleus
AhDREB-20	arahy.Tifrunner.gnm1.ann1.17GHQZ.1	arahy.Tifrunner.gnm1.Arahy.09	103993245	103994423	+	8.27	43505.3	392	-0.719	Nucleus
AhDREB-30	arahy.Tifrunner.gnm1.ann1.47NS3A.1	arahy.Tifrunner.gnm1.Arahy.15	7894918	7895406	+	8.97	17933.3	162	-0.656	Cytoplasm. Nucleus
AhDREB-6	arahy.Tifrunner.gnm1.ann1.VJ8B3Q.1	arahy.Tifrunner.gnm1.Arahy.05	7823873	7824358	+	8.6	17840.2	161	-0.673	Cytoplasm. Nucleus
AhDREB-8	arahy.Tifrunner.gnm1.ann1.JE3RIW.1	arahy.Tifrunner.gnm1.Arahy.05	40014506	40015132	+	6.05	22652.8	208	-0.63	Cytoplasm. Nucleus
AhDREB-7	arahy.Tifrunner.gnm1.ann1.0IM2G4.1	arahy.Tifrunner.gnm1.Arahy.05	12790008	12790583	+	5.77	20862.5	191	-0.361	Cytoplasm. Nucleus
AhDREB-31	arahy.Tifrunner.gnm1.ann1.RJA1IC.1	arahy.Tifrunner.gnm1.Arahy.15	13396518	13397114	+	5.58	21643.3	198	-0.383	Cytoplasm. Nucleus
AhDREB-22	arahy.Tifrunner.gnm1.ann1.LCR0LC.1	arahy.Tifrunner.gnm1.Arahy.11	63490983	63491588	+	4.55	21437.7	201	-0.508	Cytoplasm. Nucleus
AhDREB-9	arahy.Tifrunner.gnm1.ann1.PSKQ19.1	arahy.Tifrunner.gnm1.Arahy.06	2357074	2357586	-	6.89	18798.1	170	-0.609	Nucleus
AhDREB-23	arahy.Tifrunner.gnm1.ann1.X9M6WH.1	arahy.Tifrunner.gnm1.Arahy.12	4949878	4950492	+	6.91	21684.1	204	-0.511	Cytoplasm. Nucleus
AhDREB-38	arahy.Tifrunner.gnm1.ann1.GS7VU5.1	arahy.Tifrunner.gnm1.Arahy.18	5897199	5897999	-	6.97	29152.7	266	-0.365	Cytoplasm. Nucleus
AhDREB-19	arahy.Tifrunner.gnm1.ann1.X2S259.1	arahy.Tifrunner.gnm1.Arahy.09	2964609	2965388	+	4.84	28237	259	-0.698	Cytoplasm. Nucleus
AhDREB-41	arahy.Tifrunner.gnm1.ann1.YAEJ5M.1	arahy.Tifrunner.gnm1.Arahy.19	3840699	3841493	+	4.74	28724.5	264	-0.647	Cytoplasm. Nucleus
AhDREB-37	arahy.Tifrunner.gnm1.ann1.9V08HM.1	arahy.Tifrunner.gnm1.Arahy.18	1280507	1281121	+	5.12	22439.5	204	-0.34	Cytoplasm. Nucleus
AhDREB-29	arahy.Tifrunner.gnm1.ann1.452FBF.1	arahy.Tifrunner.gnm1.Arahy.15	4827534	4828220	-	6.22	24791.6	228	-0.636	Cytoplasm. Nucleus
AhDREB-5	arahy.Tifrunner.gnm1.ann1.FAI7YU.1	arahy.Tifrunner.gnm1.Arahy.05	4827534	4828220	-	6.22	24791.6	228	-0.636	Cytoplasm. Nucleus
AhDREB-2	arahy.Tifrunner.gnm1.ann1.K6GECI.1	arahy.Tifrunner.gnm1.Arahy.02	7010051	7010776	+	4.96	26432.7	241	-0.759	Cytoplasm. Nucleus
AhDREB-24	arahy.Tifrunner.gnm1.ann1.VUU22W.1	arahy.Tifrunner.gnm1.Arahy.12	9514970	9515668	+	5.27	25420.7	232	-0.777	Cytoplasm. Nucleus
AhERF-37	arahy.Tifrunner.gnm1.ann1.Y7XFN8.1	arahy.Tifrunner.gnm1.Arahy.11	2549540	2550388	+	6.16	30806.3	282	-0.55	Nucleus
AhERF-1	arahy.Tifrunner.gnm1.ann1.G0YQ1S.1	arahy.Tifrunner.gnm1.Arahy.01	8246914	8247762	-	6.55	30761.2	282	-0.545	Nucleus
AhERF-17	arahy.Tifrunner.gnm1.ann1.3WAX0M.1	arahy.Tifrunner.gnm1.Arahy.06	2813703	2814611	-	5.14	34336.2	302	-0.724	Cytoplasm. Nucleus
AhERF-57	arahy.Tifrunner.gnm1.ann1.J6K2KY.1	arahy.Tifrunner.gnm1.Arahy.16	21674287	21675156	+	5.21	32831.7	289	-0.725	Cytoplasm. Nucleus
AhERF-52	arahy.Tifrunner.gnm1.ann1.N4EN9H.1	arahy.Tifrunner.gnm1.Arahy.15	16685618	16686595	+	5.71	36173.7	325	-0.739	Nucleus
AhERF-25	arahy.Tifrunner.gnm1.ann1.Q66BD2.1	arahy.Tifrunner.gnm1.Arahy.08	8638046	8639269	-	4.7	45279.9	407	-0.68	Nucleus
AhERF-19	arahy.Tifrunner.gnm1.ann1.H1793N.1	arahy.Tifrunner.gnm1.Arahy.06	7043252	7044406	+	6.3	42457.9	384	-0.748	Nucleus
AhERF-7	arahy.Tifrunner.gnm1.ann1.WBA6PF.1	arahy.Tifrunner.gnm1.Arahy.03	132467434	132469496	+	6.65	40600.2	366	-0.77	Nucleus
AhERF-44	arahy.Tifrunner.gnm1.ann1.8UYF3G.1	arahy.Tifrunner.gnm1.Arahy.13	134949225	134950379	+	6.81	42685.5	384	-0.754	Nucleus
AhERF-61	arahy.Tifrunner.gnm1.ann1.804PS6.1	arahy.Tifrunner.gnm1.Arahy.16	131304084	131305337	-	8.01	34382.3	312	-0.743	Nucleus
AhERF-2	arahy.Tifrunner.gnm1.ann1.PSW8JM.1	arahy.Tifrunner.gnm1.Arahy.02	1821984	1823504	-	9.1	55632.1	506	-0.74	Nucleus
AhERF-3	arahy.Tifrunner.gnm1.ann1.4E6KYK.1	arahy.Tifrunner.gnm1.Arahy.02	1853604	1854581	+	10.56	35427.9	325	-0.743	Nucleus
AhERF-38	arahy.Tifrunner.gnm1.ann1.PE2T0M.1	arahy.Tifrunner.gnm1.Arahy.12	2342078	2343817	-	9.73	63726.8	579	-0.945	Nucleus
AhERF-21	arahy.Tifrunner.gnm1.ann1.2RQ41J.1	arahy.Tifrunner.gnm1.Arahy.06	98122111	98122971	-	5.53	31574	286	-0.908	Nucleus
AhERF-59	arahy.Tifrunner.gnm1.ann1.K3BVMJ.1	arahy.Tifrunner.gnm1.Arahy.16	128675323	128676183	-	5.36	31540	286	-0.885	Nucleus
AhERF-30	arahy.Tifrunner.gnm1.ann1.C5BSUS.1	arahy.Tifrunner.gnm1.Arahy.10	190763	191836	+	5.25	39504.3	357	-0.67	Nucleus
AhERF-70	arahy.Tifrunner.gnm1.ann1.ZQ3898.1	arahy.Tifrunner.gnm1.Arahy.20	1467307	1468368	-	5.51	39134	353	-0.676	Nucleus
AhERF-64	arahy.Tifrunner.gnm1.ann1.WPAQ8S.1	arahy.Tifrunner.gnm1.Arahy.18	247149	248040	-	9.61	26091.6	235	-0.635	Nucleus
AhERF-74	arahy.Tifrunner.gnm1.ann1.57AKVM.1	arahy.Tifrunner.gnm1.Arahy.20	4317606	4318199	-	9.83	20953.6	197	-0.387	Nucleus
AhERF-34	arahy.Tifrunner.gnm1.ann1.ILN3K9.1	arahy.Tifrunner.gnm1.Arahy.10	2237433	2238023	-	9.83	20921.6	196	-0.385	Nucleus
AhERF-43	arahy.Tifrunner.gnm1.ann1.4AG551.1	arahy.Tifrunner.gnm1.Arahy.13	130769463	130769966	+	9.61	18118.7	167	-0.422	Nucleus
AhERF-53	arahy.Tifrunner.gnm1.ann1.KB746A.1	arahy.Tifrunner.gnm1.Arahy.15	157565587	157566240	-	8.87	24182.4	217	-0.575	Nucleus
AhERF-40	arahy.Tifrunner.gnm1.ann1.HGAZ7D.1	arahy.Tifrunner.gnm1.Arahy.13	23090442	23091197	-	9.45	27509.9	251	-0.685	Nucleus
AhERF-65	arahy.Tifrunner.gnm1.ann1.L00VS1.1	arahy.Tifrunner.gnm1.Arahy.18	11572478	11573131	-	9.04	23873.1	217	-0.477	Nucleus
AhERF-73	arahy.Tifrunner.gnm1.ann1.AS0C7C.1	arahy.Tifrunner.gnm1.Arahy.20	4283629	4284342	+	9.37	25400.1	237	-0.622	Nucleus
AhERF-33	arahy.Tifrunner.gnm1.ann1.QGFJ76.1	arahy.Tifrunner.gnm1.Arahy.10	2193936	2194649	+	9.21	25324	237	-0.603	Nucleus
AhERF-62	arahy.Tifrunner.gnm1.ann1.8ZPK8F.1	arahy.Tifrunner.gnm1.Arahy.17	3139716	3140402	-	8.47	24175.2	228	-0.428	Nucleus
AhERF-23	arahy.Tifrunner.gnm1.ann1.JEZR1W.1	arahy.Tifrunner.gnm1.Arahy.07	1789867	1790553	-	8.16	24148.1	228	-0.414	Nucleus
AhERF-45	arahy.Tifrunner.gnm1.ann1.DU9C9C.1	arahy.Tifrunner.gnm1.Arahy.14	1253866	1254486	+	6.6	22303	206	-0.558	Nucleus
AhERF-8	arahy.Tifrunner.gnm1.ann1.F0BU8J.1	arahy.Tifrunner.gnm1.Arahy.04	749337	749957	+	6.6	22287	206	-0.546	Nucleus
AhERF-24	arahy.Tifrunner.gnm1.ann1.DY3CW6.1	arahy.Tifrunner.gnm1.Arahy.07	6490193	6490852	+	6.23	24038.7	219	-0.656	Nucleus
AhERF-63	arahy.Tifrunner.gnm1.ann1.RX34PI.1	arahy.Tifrunner.gnm1.Arahy.17	8444342	8445001	+	6.23	24008.6	219	-0.645	Nucleus
AhERF-28	arahy.Tifrunner.gnm1.ann1.J0DG7J.1	arahy.Tifrunner.gnm1.Arahy.09	113679717	113681636	-	5.05	50349.5	459	-0.401	Cytoplasm
AhERF-69	arahy.Tifrunner.gnm1.ann1.VG3SGX.1	arahy.Tifrunner.gnm1.Arahy.19	154643416	154646976	+	4.72	37211	342	-0.649	Cytoplasm. Nucleus
AhERF-11	arahy.Tifrunner.gnm1.ann1.5I2TXN.1	arahy.Tifrunner.gnm1.Arahy.04	126496698	126500765	-	6.38	31831.8	280	-1.141	Nucleus
AhERF-49	arahy.Tifrunner.gnm1.ann1.ARVN7W.1	arahy.Tifrunner.gnm1.Arahy.14	140932228	140936295	-	6.38	31831.8	280	-1.141	Nucleus
AhERF-22	arahy.Tifrunner.gnm1.ann1.E9BLTS.1	arahy.Tifrunner.gnm1.Arahy.06	98737122	98739745	-	9.1	33260.7	295	-1.085	Nucleus
AhERF-60	arahy.Tifrunner.gnm1.ann1.I2ZHTU.1	arahy.Tifrunner.gnm1.Arahy.16	129566480	129569229	-	8.73	34241.7	306	-1.124	Nucleus
AhERF-41	arahy.Tifrunner.gnm1.ann1.88B2ED.4	arahy.Tifrunner.gnm1.Arahy.13	119483600	119486481	+	9.56	28455.6	254	-0.904	Nucleus
AhERF-26	arahy.Tifrunner.gnm1.ann1.2Q12N5.1	arahy.Tifrunner.gnm1.Arahy.08	49740291	49742802	-	7.28	26515.7	233	-1.16	Cytoplasm. Nucleus
AhERF-66	arahy.Tifrunner.gnm1.ann1.B66PX0.1	arahy.Tifrunner.gnm1.Arahy.18	133703606	133706300	-	6.66	26455.6	232	-1.197	Nucleus
AhERF-54	arahy.Tifrunner.gnm1.ann1.0UF999.1	arahy.Tifrunner.gnm1.Arahy.15	159626271	159628571	-	6.72	50309.9	464	-0.734	Nucleus
AhERF-14	arahy.Tifrunner.gnm1.ann1.WDSQ8J.1	arahy.Tifrunner.gnm1.Arahy.05	114757064	114759546	-	6.55	51894.7	480	-0.711	Nucleus
AhERF-68	arahy.Tifrunner.gnm1.ann1.2Y0GDL.1	arahy.Tifrunner.gnm1.Arahy.19	149731657	149733439	-	6.46	41689	379	-0.72	Nucleus
AhERF-29	arahy.Tifrunner.gnm1.ann1.P2THRP.1	arahy.Tifrunner.gnm1.Arahy.09	117149640	117151160	+	7.33	41813.9	379	-0.773	Nucleus
AhERF-6	arahy.Tifrunner.gnm1.ann1.2AHI7R.1	arahy.Tifrunner.gnm1.Arahy.03	122107067	122109479	+	8.6	33850.7	312	-0.497	Nucleus
AhERF-42	arahy.Tifrunner.gnm1.ann1.F2D5GR.1	arahy.Tifrunner.gnm1.Arahy.13	125239845	125241403	+	8.61	33693.6	310	-0.539	Nucleus
AhERF-35	arahy.Tifrunner.gnm1.ann1.768P1R.1	arahy.Tifrunner.gnm1.Arahy.10	87632354	87634971	-	7.88	42598.1	394	-0.481	Nucleus
AhERF-36	arahy.Tifrunner.gnm1.ann1.768P1R.2	arahy.Tifrunner.gnm1.Arahy.10	87632354	87635009	-	7.17	37841.7	350	-0.523	Nucleus
AhERF-76	arahy.Tifrunner.gnm1.ann1.EZ5RGK.1	arahy.Tifrunner.gnm1.Arahy.20	108396850	108399235	-	6.77	36963.7	343	-0.567	Nucleus
AhERF-55	arahy.Tifrunner.gnm1.ann1.GIJ59W.1	arahy.Tifrunner.gnm1.Arahy.16	1264244	1264621	+	8.14	14462.9	125	-0.944	Nucleus
AhERF-9	arahy.Tifrunner.gnm1.ann1.45NR7C.1	arahy.Tifrunner.gnm1.Arahy.04	16755329	16758854	-	5.04	47662.9	426	-0.778	Nucleus
AhERF-10	arahy.Tifrunner.gnm1.ann1.45NR7C.3	arahy.Tifrunner.gnm1.Arahy.04	16755329	16757838	-	5.13	30220.8	273	-0.626	Nucleus
AhERF-46	arahy.Tifrunner.gnm1.ann1.ER44IM.1	arahy.Tifrunner.gnm1.Arahy.14	17225079	17227847	-	5.12	30243.9	273	-0.623	Nucleus
AhERF-75	arahy.Tifrunner.gnm1.ann1.0PYI42.1	arahy.Tifrunner.gnm1.Arahy.20	24117118	24117642	+	6.15	19455.9	174	-0.725	Nucleus
AhERF-56	arahy.Tifrunner.gnm1.ann1.DRB5KP.1	arahy.Tifrunner.gnm1.Arahy.16	12175596	12177818	+	5.5	34672.9	309	-0.923	Nucleus
AhERF-20	arahy.Tifrunner.gnm1.ann1.GP7L65.1	arahy.Tifrunner.gnm1.Arahy.06	8130278	8131710	-	5.39	34057.2	304	-0.916	Nucleus
AhERF-16	arahy.Tifrunner.gnm1.ann1.ZJ433C.2	arahy.Tifrunner.gnm1.Arahy.06	1468307	1471723	+	4.9	41371.9	374	-0.727	Nucleus
AhERF-15	arahy.Tifrunner.gnm1.ann1.ZJ433C.1	arahy.Tifrunner.gnm1.Arahy.06	1468307	1471448	+	4.9	41371.9	374	-0.727	Nucleus
AhERF-58	arahy.Tifrunner.gnm1.ann1.MMX4MC.1	arahy.Tifrunner.gnm1.Arahy.16	25811483	25814331	-	4.9	41496	376	-0.707	Nucleus
AhERF-39	arahy.Tifrunner.gnm1.ann1.GGDF5U.1	arahy.Tifrunner.gnm1.Arahy.12	8701329	8704310	+	5.19	43073.9	393	-0.688	Nucleus
AhERF-4	arahy.Tifrunner.gnm1.ann1.VF7WU9.1	arahy.Tifrunner.gnm1.Arahy.02	6496820	6499823	+	5.2	43225.1	393	-0.708	Nucleus
AhERF-67	arahy.Tifrunner.gnm1.ann1.87AL67.1	arahy.Tifrunner.gnm1.Arahy.19	135295546	135296807	-	4.95	22329	197	-0.537	Nucleus
AhERF-27	arahy.Tifrunner.gnm1.ann1.KF0N62.1	arahy.Tifrunner.gnm1.Arahy.09	104242565	104243884	-	4.95	22556.2	200	-0.569	Nucleus
AhERF-50	arahy.Tifrunner.gnm1.ann1.FU6CIC.1	arahy.Tifrunner.gnm1.Arahy.15	4936947	4937720	-	9.19	28613	257	-0.713	Nucleus
AhERF-12	arahy.Tifrunner.gnm1.ann1.JGE7BU.1	arahy.Tifrunner.gnm1.Arahy.05	4936947	4937720	-	9.19	28613	257	-0.713	Nucleus
AhERF-51	arahy.Tifrunner.gnm1.ann1.4XS3FZ.1	arahy.Tifrunner.gnm1.Arahy.15	4961993	4962835	+	6.25	30430.3	280	-0.383	Nucleus
AhERF-13	arahy.Tifrunner.gnm1.ann1.ZW7540.1	arahy.Tifrunner.gnm1.Arahy.05	4961993	4962835	+	6.25	30430.3	280	-0.383	Nucleus
AhERF-47	arahy.Tifrunner.gnm1.ann1.BDR3J7.1	arahy.Tifrunner.gnm1.Arahy.14	135823737	135824324	+	7.82	22111.5	195	-0.942	Nucleus
AhERF-48	arahy.Tifrunner.gnm1.ann1.C7A6P7.1	arahy.Tifrunner.gnm1.Arahy.14	135828384	135829260	+	6.14	30546.2	273	-0.584	Nucleus
AhERF-71	arahy.Tifrunner.gnm1.ann1.EAK3RU.1	arahy.Tifrunner.gnm1.Arahy.20	4012980	4013735	+	5.64	28211.3	251	-0.717	Nucleus
AhERF-31	arahy.Tifrunner.gnm1.ann1.T22KDW.1	arahy.Tifrunner.gnm1.Arahy.10	1895334	1896869	+	6.9	37296.6	335	-0.677	Nucleus
AhERF-32	arahy.Tifrunner.gnm1.ann1.L5Q3AX.1	arahy.Tifrunner.gnm1.Arahy.10	1898822	1899271	-	9.3	16652.7	149	-0.7	Nucleus
AhERF-72	arahy.Tifrunner.gnm1.ann1.L65DKI.1	arahy.Tifrunner.gnm1.Arahy.20	4016328	4016792	-	9.3	17140.2	154	-0.672	Nucleus
AhERF-18	arahy.Tifrunner.gnm1.ann1.LF78J6.1	arahy.Tifrunner.gnm1.Arahy.06	3355306	3356774	+	5.7	22130.9	197	-0.609	Nucleus
AhERF-5	arahy.Tifrunner.gnm1.ann1.QR2UB9.1	arahy.Tifrunner.gnm1.Arahy.02	13757454	13758440	+	6.54	28297.1	250	-1.02	Nucleus

## Sheet: Table S4
Supplementary Table S4. Characterization of ERF and DREB subfamily proteins in A. hypogaea cv. Tifrunner.
Group Name	Gene Name	PeanutBase Locus Identifier
III	AhDREB-29	arahy.Tifrunner.gnm1.ann1.452FBF.1
	AhDREB-5	arahy.Tifrunner.gnm1.ann1.FAI7YU.1
	AhDREB-2	arahy.Tifrunner.gnm1.ann1.K6GECI.1
	AhDREB-24	arahy.Tifrunner.gnm1.ann1.VUU22W.1
	AhDREB-37	arahy.Tifrunner.gnm1.ann1.9V08HM.1
	AhDREB-19	arahy.Tifrunner.gnm1.ann1.X2S259.1
	AhDREB-41	arahy.Tifrunner.gnm1.ann1.YAEJ5M.1
	AhDREB-38	arahy.Tifrunner.gnm1.ann1.GS7VU5.1
	AhDREB-9	arahy.Tifrunner.gnm1.ann1.PSKQ19.1
	AhDREB-23	arahy.Tifrunner.gnm1.ann1.X9M6WH.1
	AhDREB-22	arahy.Tifrunner.gnm1.ann1.LCR0LC.1
	AhDREB-7	arahy.Tifrunner.gnm1.ann1.0IM2G4.1
	AhDREB-31	arahy.Tifrunner.gnm1.ann1.RJA1IC.1
II	AhDREB-8	arahy.Tifrunner.gnm1.ann1.JE3RIW.1
	AhDREB-30	arahy.Tifrunner.gnm1.ann1.47NS3A.1
	AhDREB-6	arahy.Tifrunner.gnm1.ann1.VJ8B3Q.1
I	AhDREB-33	arahy.Tifrunner.gnm1.ann1.WP3ECB.1
	AhDREB-13	arahy.Tifrunner.gnm1.ann1.XJX19T.1
	AhDREB-20	arahy.Tifrunner.gnm1.ann1.17GHQZ.1
IV	AhDREB-32	arahy.Tifrunner.gnm1.ann1.301SU2.1
	AhDREB-10	arahy.Tifrunner.gnm1.ann1.B20XFZ.1
	AhDREB-15	arahy.Tifrunner.gnm1.ann1.15RNTX.1
	AhDREB-35	arahy.Tifrunner.gnm1.ann1.5KI8FH.1
	AhDREB-12	arahy.Tifrunner.gnm1.ann1.73DHZN.1
	AhDREB-39	arahy.Tifrunner.gnm1.ann1.L5HMHT.1
	AhDREB-25	arahy.Tifrunner.gnm1.ann1.KD4831.1
	AhDREB-3	arahy.Tifrunner.gnm1.ann1.SE8WTS.1
	AhDREB-27	arahy.Tifrunner.gnm1.ann1.KQL0FY.1
	AhDREB-4	arahy.Tifrunner.gnm1.ann1.U8GE9Q.1
	AhDREB-28	arahy.Tifrunner.gnm1.ann1.2N75TD.1
	AhDREB-17	arahy.Tifrunner.gnm1.ann1.X9ZZC1.1
V	AhDREB-34	arahy.Tifrunner.gnm1.ann1.2YN4P9.1
	AhDREB-11	arahy.Tifrunner.gnm1.ann1.JRIM60.1
	AhDREB-21	arahy.Tifrunner.gnm1.ann1.MMJQ7K.1
	AhDREB-18	arahy.Tifrunner.gnm1.ann1.VHG0QP.1
	AhDREB-16	arahy.Tifrunner.gnm1.ann1.3D7MPL.1
	AhDREB-40	arahy.Tifrunner.gnm1.ann1.KDEH1Y.1
	AhDREB-14	arahy.Tifrunner.gnm1.ann1.8V3MXA.1
	AhDREB-36	arahy.Tifrunner.gnm1.ann1.P2AB97.1
	AhDREB-1	arahy.Tifrunner.gnm1.ann1.CSV6ZK.1
	AhDREB-26	arahy.Tifrunner.gnm1.ann1.DIZB8V.1
VI	AhERF-17	arahy.Tifrunner.gnm1.ann1.3WAX0M.1
	AhERF-57	arahy.Tifrunner.gnm1.ann1.J6K2KY.1
	AhERF-52	arahy.Tifrunner.gnm1.ann1.N4EN9H.1
	AhERF-25	arahy.Tifrunner.gnm1.ann1.Q66BD2.1
	AhERF-37	arahy.Tifrunner.gnm1.ann1.Y7XFN8.1
	AhERF-1	arahy.Tifrunner.gnm1.ann1.G0YQ1S.1
VIII	AhERF-19	arahy.Tifrunner.gnm1.ann1.H1793N.1
	AhERF-7	arahy.Tifrunner.gnm1.ann1.WBA6PF.1
	AhERF-44	arahy.Tifrunner.gnm1.ann1.8UYF3G.1
	AhERF-61	arahy.Tifrunner.gnm1.ann1.804PS6.1
	AhERF-2	arahy.Tifrunner.gnm1.ann1.PSW8JM.1
	AhERF-3	arahy.Tifrunner.gnm1.ann1.4E6KYK.1
	AhERF-38	arahy.Tifrunner.gnm1.ann1.PE2T0M.1
	AhERF-21	arahy.Tifrunner.gnm1.ann1.2RQ41J.1
	AhERF-59	arahy.Tifrunner.gnm1.ann1.K3BVMJ.1
	AhERF-30	arahy.Tifrunner.gnm1.ann1.C5BSUS.1
	AhERF-70	arahy.Tifrunner.gnm1.ann1.ZQ3898.1
	AhERF-64	arahy.Tifrunner.gnm1.ann1.WPAQ8S.1
	AhERF-74	arahy.Tifrunner.gnm1.ann1.57AKVM.1
	AhERF-34	arahy.Tifrunner.gnm1.ann1.ILN3K9.1
	AhERF-43	arahy.Tifrunner.gnm1.ann1.4AG551.1
	AhERF-53	arahy.Tifrunner.gnm1.ann1.KB746A.1
	AhERF-40	arahy.Tifrunner.gnm1.ann1.HGAZ7D.1
	AhERF-65	arahy.Tifrunner.gnm1.ann1.L00VS1.1
	AhERF-73	arahy.Tifrunner.gnm1.ann1.AS0C7C.1
	AhERF-33	arahy.Tifrunner.gnm1.ann1.QGFJ76.1
	AhERF-62	arahy.Tifrunner.gnm1.ann1.8ZPK8F.1
	AhERF-23	arahy.Tifrunner.gnm1.ann1.JEZR1W.1
	AhERF-45	arahy.Tifrunner.gnm1.ann1.DU9C9C.1
	AhERF-8	arahy.Tifrunner.gnm1.ann1.F0BU8J.1
	AhERF-24	arahy.Tifrunner.gnm1.ann1.DY3CW6.1
	AhERF-63	arahy.Tifrunner.gnm1.ann1.RX34PI.1
VI-L	AhERF-28	arahy.Tifrunner.gnm1.ann1.J0DG7J.1
	AhERF-69	arahy.Tifrunner.gnm1.ann1.VG3SGX.1
X	AhERF-11	arahy.Tifrunner.gnm1.ann1.5I2TXN.1
	AhERF-49	arahy.Tifrunner.gnm1.ann1.ARVN7W.1
	AhERF-22	arahy.Tifrunner.gnm1.ann1.E9BLTS.1
	AhERF-60	arahy.Tifrunner.gnm1.ann1.I2ZHTU.1
	AhERF-41	arahy.Tifrunner.gnm1.ann1.88B2ED.4
	AhERF-26	arahy.Tifrunner.gnm1.ann1.2Q12N5.1
	AhERF-66	arahy.Tifrunner.gnm1.ann1.B66PX0.1
	AhERF-54	arahy.Tifrunner.gnm1.ann1.0UF999.1
	AhERF-14	arahy.Tifrunner.gnm1.ann1.WDSQ8J.1
	AhERF-68	arahy.Tifrunner.gnm1.ann1.2Y0GDL.1
	AhERF-29	arahy.Tifrunner.gnm1.ann1.P2THRP.1
	AhERF-6	arahy.Tifrunner.gnm1.ann1.2AHI7R.1
	AhERF-42	arahy.Tifrunner.gnm1.ann1.F2D5GR.1
	AhERF-35	arahy.Tifrunner.gnm1.ann1.768P1R.1
	AhERF-36	arahy.Tifrunner.gnm1.ann1.768P1R.2
	AhERF-76	arahy.Tifrunner.gnm1.ann1.EZ5RGK.1
VII	AhERF-55	arahy.Tifrunner.gnm1.ann1.GIJ59W.1
	AhERF-9	arahy.Tifrunner.gnm1.ann1.45NR7C.1
	AhERF-10	arahy.Tifrunner.gnm1.ann1.45NR7C.3
	AhERF-46	arahy.Tifrunner.gnm1.ann1.ER44IM.1
	AhERF-75	arahy.Tifrunner.gnm1.ann1.0PYI42.1
	AhERF-56	arahy.Tifrunner.gnm1.ann1.DRB5KP.1
	AhERF-20	arahy.Tifrunner.gnm1.ann1.GP7L65.1
	AhERF-16	arahy.Tifrunner.gnm1.ann1.ZJ433C.2
	AhERF-15	arahy.Tifrunner.gnm1.ann1.ZJ433C.1
	AhERF-58	arahy.Tifrunner.gnm1.ann1.MMX4MC.1
	AhERF-39	arahy.Tifrunner.gnm1.ann1.GGDF5U.1
	AhERF-4	arahy.Tifrunner.gnm1.ann1.VF7WU9.1
IX	AhERF-67	arahy.Tifrunner.gnm1.ann1.87AL67.1
	AhERF-27	arahy.Tifrunner.gnm1.ann1.KF0N62.1
	AhERF-50	arahy.Tifrunner.gnm1.ann1.FU6CIC.1
	AhERF-12	arahy.Tifrunner.gnm1.ann1.JGE7BU.1
	AhERF-51	arahy.Tifrunner.gnm1.ann1.4XS3FZ.1
	AhERF-13	arahy.Tifrunner.gnm1.ann1.ZW7540.1
	AhERF-47	arahy.Tifrunner.gnm1.ann1.BDR3J7.1
	AhERF-48	arahy.Tifrunner.gnm1.ann1.C7A6P7.1
	AhERF-18	arahy.Tifrunner.gnm1.ann1.LF78J6.1
	AhERF-5	arahy.Tifrunner.gnm1.ann1.QR2UB9.1
	AhERF-71	arahy.Tifrunner.gnm1.ann1.EAK3RU.1
	AhERF-31	arahy.Tifrunner.gnm1.ann1.T22KDW.1
	AhERF-32	arahy.Tifrunner.gnm1.ann1.L5Q3AX.1
	AhERF-72	arahy.Tifrunner.gnm1.ann1.L65DKI.1

## Sheet: Table S5
Supplementary Table S5. The Ka/Ks ratios for duplicated AhAP2/ERF genes.
Duplication	PeanutBase Locus Identifier	Gene name	Family-Group	PeanutBase Locus Identifier	Gene pair name	Family-Group	Ka	Ks	Ka_Ks	EffectiveLen	AverageS-sites	AverageN-sites	cN	cS	pN	pS	Note	Mya
tandem	arahy.Tifrunner.gnm1.ann1.RN6KV5.3	AhAP2-7	AP2	arahy.Tifrunner.gnm1.ann1.RN6KV5.2	AhAP2-8	AP2	0	0	NaN	1086	269.167	816.833	0	0	0	0		0
	arahy.Tifrunner.gnm1.ann1.6BK6B8.1	AhAP2-10	AP2	arahy.Tifrunner.gnm1.ann1.6BK6B8.2	AhAP2-11	AP2	0	0	NaN	2124	479.5	1644.5	0	0	0	0		0
	arahy.Tifrunner.gnm1.ann1.00XS3D.1	AhAP2-15	AP2	arahy.Tifrunner.gnm1.ann1.00XS3D.2	AhAP2-16	AP2	0	0	NaN	1308	305	1003	0	0	0	0		0
	arahy.Tifrunner.gnm1.ann1.MRL478.1	AhAP2-19	AP2	arahy.Tifrunner.gnm1.ann1.MRL478.2	AhAP2-20	AP2	0	0	NaN	1392	321.667	1070.33	0	0	0	0		0
	arahy.Tifrunner.gnm1.ann1.4G06NJ.1	AhAP2-44	AP2	arahy.Tifrunner.gnm1.ann1.4G06NJ.2	AhAP2-45	AP2	0	0	NaN	1482	341.167	1140.83	0	0	0	0		0
	arahy.Tifrunner.gnm1.ann1.QI820R.1	AhAP2-56	AP2	arahy.Tifrunner.gnm1.ann1.QI820R.2	AhAP2-57	AP2	0	0	NaN	375	78.6667	296.333	0	0	0	0		0
	arahy.Tifrunner.gnm1.ann1.45NR7C.1	AhERF-9	ERF-VII	arahy.Tifrunner.gnm1.ann1.45NR7C.3	AhERF-10	ERF-VII	0	0	NaN	813	181.833	631.167	0	0	0	0		0
	arahy.Tifrunner.gnm1.ann1.ZJ433C.2	AhERF-16	ERF-VII	arahy.Tifrunner.gnm1.ann1.ZJ433C.1	AhERF-15	ERF-VII	0	0	NaN	1116	255	861	0	0	0	0		0
	arahy.Tifrunner.gnm1.ann1.UU942A.1	AhAP2-47	AP2	arahy.Tifrunner.gnm1.ann1.UU942A.2	AhAP2-48	AP2	0.00154679	0	#NAME?	825	177.833	647.167	1	0	0.0015452	0		0
	arahy.Tifrunner.gnm1.ann1.PSW8JM.1	AhERF-2	ERF-VIII	arahy.Tifrunner.gnm1.ann1.4E6KYK.1	AhERF-3	ERF-VIII	0.107572	0.158869	0.677115	930	228.167	701.833	70.3333	32.6667	0.100214	0.14317		9.78255
	arahy.Tifrunner.gnm1.ann1.T22KDW.1	AhERF-31	ERF-IX	arahy.Tifrunner.gnm1.ann1.L5Q3AX.1	AhERF-32	ERF-IX	0.47505	1.64271	0.289188	429	95.5833	333.417	117.333	63.6667	0.351912	0.666085		101.152
	arahy.Tifrunner.gnm1.ann1.768P1R.1	AhERF-35	ERF-X	arahy.Tifrunner.gnm1.ann1.768P1R.2	AhERF-36	ERF-X	0.00698714	0.0139539	0.50073	1044	253.167	790.833	5.5	3.5	0.00695469	0.0138249		0.85923
	arahy.Tifrunner.gnm1.ann1.BDR3J7.1	AhERF-47	ERF-IX	arahy.Tifrunner.gnm1.ann1.C7A6P7.1	AhERF-48	ERF-IX	0.370721	1.25996	0.294233	576	133.833	442.167	129.333	81.6667	0.292499	0.610212		77.5836
	arahy.Tifrunner.gnm1.ann1.EAK3RU.1	AhERF-71	ERF-IX	arahy.Tifrunner.gnm1.ann1.L65DKI.1	AhERF-72	ERF-IX	0.505087	1.54358	0.327217	444	100.5	343.5	126.25	65.75	0.36754	0.654229		95.0483
mean							0.370721	1.25996	0.327217	576	133.833	442.167	117.333	63.6667	0.292499	0.610212		43.6831
segmental	arahy.Tifrunner.gnm1.ann1.RWA9J9.1	AhAP2-13	AP2	arahy.Tifrunner.gnm1.ann1.N9BW0I.1	AhAP2-42	AP2	0	0	NaN	1548	374.667	1173.33	0	0	0	0		0
	arahy.Tifrunner.gnm1.ann1.FAI7YU.1	AhDREB-5	DREB-III	arahy.Tifrunner.gnm1.ann1.452FBF.1	AhDREB-29	III	0	0	NaN	678	166	512	0	0	0	0		0
	arahy.Tifrunner.gnm1.ann1.8V3MXA.1	AhDREB-14	DREB-V	arahy.Tifrunner.gnm1.ann1.P2AB97.1	AhDREB-36	V	0	0	NaN	633	148.667	484.333	0	0	0	0		0
	arahy.Tifrunner.gnm1.ann1.5I2TXN.1	AhERF-11	ERF-X	arahy.Tifrunner.gnm1.ann1.ARVN7W.1	AhERF-49	ERF-X	0	0	NaN	834	176.833	657.167	0	0	0	0		0
	arahy.Tifrunner.gnm1.ann1.JGE7BU.1	AhERF-12	ERF-IX	arahy.Tifrunner.gnm1.ann1.FU6CIC.1	AhERF-50	ERF-IX	0	0	NaN	765	180.333	584.667	0	0	0	0		0
	arahy.Tifrunner.gnm1.ann1.ZW7540.1	AhERF-13	ERF-IX	arahy.Tifrunner.gnm1.ann1.4XS3FZ.1	AhERF-51	ERF-IX	0	0	NaN	834	208.333	625.667	0	0	0	0		0
	arahy.Tifrunner.gnm1.ann1.4AG551.1	AhERF-43	ERF-VIII	arahy.Tifrunner.gnm1.ann1.AS0C7C.1	AhERF-73	ERF-VIII	0.527597	NaN	NaN	474	119.417	354.583	134.333	89.6667	0.378848	0.750872	High Sequence Divergence Value (pS>=0.75)
	arahy.Tifrunner.gnm1.ann1.M71NXQ.1	AhAP2-2	AP2	arahy.Tifrunner.gnm1.ann1.ULX5CX.1	AhAP2-31	AP2	0.00934228	0.0507951	0.183921	1659	366.5	1292.5	12	18	0.00928433	0.0491132		3.12778
	arahy.Tifrunner.gnm1.ann1.M71NXQ.1	AhAP2-2	AP2	arahy.Tifrunner.gnm1.ann1.6V99EA.1	AhAP2-43	AP2	0.291325	1.23139	0.236583	1386	306.583	1079.42	260.583	185.417	0.241411	0.604784		75.8244
	arahy.Tifrunner.gnm1.ann1.5AD0HB.1	AhAP2-3	AP2	arahy.Tifrunner.gnm1.ann1.XI0ITM.1	AhAP2-35	AP2	0.0386265	0.070725	0.54615	1290	316.083	973.917	36.6667	21.3333	0.0376487	0.0674928		4.35499
	arahy.Tifrunner.gnm1.ann1.KP68JR.1	AhAP2-4	AP2	arahy.Tifrunner.gnm1.ann1.HG2532.2	AhAP2-33	AP2	0.0192103	0.0475246	0.404219	1053	222.583	830.417	15.75	10.25	0.0189664	0.0460502		2.92639
	arahy.Tifrunner.gnm1.ann1.K6QUG2.1	AhAP2-5	AP2	arahy.Tifrunner.gnm1.ann1.KDI7TH.1	AhAP2-24	AP2	0.220115	0.774095	0.284351	1335	312.75	1022.25	195	151	0.190756	0.482814		47.666
	arahy.Tifrunner.gnm1.ann1.K6QUG2.1	AhAP2-5	AP2	arahy.Tifrunner.gnm1.ann1.QEK7F9.1	AhAP2-36	AP2	0.00360469	0.00888461	0.405723	1452	339.667	1112.33	4	3	0.00359604	0.00883219		0.547082
	arahy.Tifrunner.gnm1.ann1.K6QUG2.1	AhAP2-5	AP2	arahy.Tifrunner.gnm1.ann1.YSN9W3.2	AhAP2-54	AP2	0.144417	0.584411	0.247115	1398	329.083	1068.92	140.417	133.583	0.131364	0.405926		35.9859
	arahy.Tifrunner.gnm1.ann1.TN1J43.1	AhAP2-6	AP2	arahy.Tifrunner.gnm1.ann1.ETC6KF.1	AhAP2-23	AP2	0.28801	1.3987	0.205912	1173	262.167	910.833	217.833	166.167	0.239158	0.633821		86.1271
	arahy.Tifrunner.gnm1.ann1.TN1J43.1	AhAP2-6	AP2	arahy.Tifrunner.gnm1.ann1.L4Q0K2.1	AhAP2-37	AP2	0.0122158	0.038033	0.321189	1479	323.583	1155.42	14	12	0.0121168	0.0370847		2.34193
	arahy.Tifrunner.gnm1.ann1.RN6KV5.2	AhAP2-8	AP2	arahy.Tifrunner.gnm1.ann1.WU5RMI.1	AhAP2-38	AP2	0.012219	0.049779	0.245465	1095	269.917	825.083	10	13	0.01212	0.048163		3.06521
	arahy.Tifrunner.gnm1.ann1.6BK6B8.1	AhAP2-10	AP2	arahy.Tifrunner.gnm1.ann1.HP6LSM.1	AhAP2-40	AP2	0.00392714	0.0527943	0.0743857	1983	451.167	1531.83	6	23	0.00391688	0.0509789		3.25088
	arahy.Tifrunner.gnm1.ann1.F5Q2PM.1	AhAP2-12	AP2	arahy.Tifrunner.gnm1.ann1.F0M2KT.1	AhAP2-28	AP2	0.221148	1.2083	0.183024	942	204.5	737.5	141.25	122.75	0.191525	0.600244		74.4028
	arahy.Tifrunner.gnm1.ann1.F5Q2PM.1	AhAP2-12	AP2	arahy.Tifrunner.gnm1.ann1.I3YYWX.1	AhAP2-41	AP2	0.0075958	0.0230699	0.329252	1014	220.083	793.917	6	5	0.00755747	0.0227187		1.42056
	arahy.Tifrunner.gnm1.ann1.F5Q2PM.1	AhAP2-12	AP2	arahy.Tifrunner.gnm1.ann1.5MV2CV.1	AhAP2-59	AP2	0.217943	1.17412	0.185622	936	202.833	733.167	138.667	120.333	0.189134	0.593262		72.2983
	arahy.Tifrunner.gnm1.ann1.00XS3D.1	AhAP2-15	AP2	arahy.Tifrunner.gnm1.ann1.H1PWIN.1	AhAP2-29	AP2	0.195765	0.9191	0.212997	885	197.25	687.75	118.5	104.5	0.172301	0.529785		56.5948
	arahy.Tifrunner.gnm1.ann1.00XS3D.1	AhAP2-15	AP2	arahy.Tifrunner.gnm1.ann1.4G06NJ.2	AhAP2-45	AP2	0.00547115	0.0468414	0.116801	1431	330.333	1100.67	6	15	0.00545124	0.0454087		2.88433
	arahy.Tifrunner.gnm1.ann1.AE6IJA.1	AhAP2-17	AP2	arahy.Tifrunner.gnm1.ann1.6MJ8Q6.1	AhAP2-49	AP2	0.00263911	0.0183355	0.143934	1470	331.25	1138.75	3	6	0.00263447	0.0181132		1.12903
	arahy.Tifrunner.gnm1.ann1.MRL478.1	AhAP2-19	AP2	arahy.Tifrunner.gnm1.ann1.38RLY4.1	AhAP2-50	AP2	0.0141303	0.0286279	0.493583	1392	320.417	1071.58	15	9	0.013998	0.0280884		1.7628
	arahy.Tifrunner.gnm1.ann1.9T6609.1	AhAP2-21	AP2	arahy.Tifrunner.gnm1.ann1.ZL8GWI.1	AhAP2-51	AP2	0.00765914	0.0289999	0.264109	2163	457	1706	13	13	0.00762016	0.0284464		1.78571
	arahy.Tifrunner.gnm1.ann1.9T6609.1	AhAP2-21	AP2	arahy.Tifrunner.gnm1.ann1.J9H0YQ.1	AhAP2-52	AP2	0.323841	1.27133	0.254726	1638	361.333	1276.67	335.75	221.25	0.26299	0.612315		78.2839
	arahy.Tifrunner.gnm1.ann1.7SA24Y.1	AhAP2-22	AP2	arahy.Tifrunner.gnm1.ann1.J9H0YQ.1	AhAP2-52	AP2	0.0186766	0.0220139	0.848402	1617	361.083	1255.92	23.1667	7.83333	0.018446	0.021694		1.35554
	arahy.Tifrunner.gnm1.ann1.ETC6KF.1	AhAP2-23	AP2	arahy.Tifrunner.gnm1.ann1.L4Q0K2.1	AhAP2-37	AP2	0.266339	1.38862	0.191802	1158	255.833	902.167	202.25	161.75	0.224183	0.632248		85.5059
	arahy.Tifrunner.gnm1.ann1.KDI7TH.1	AhAP2-24	AP2	arahy.Tifrunner.gnm1.ann1.QEK7F9.1	AhAP2-36	AP2	0.218232	0.777142	0.280814	1335	313.083	1021.92	193.5	151.5	0.18935	0.483897		47.8535
	arahy.Tifrunner.gnm1.ann1.KDI7TH.1	AhAP2-24	AP2	arahy.Tifrunner.gnm1.ann1.YSN9W3.2	AhAP2-54	AP2	0.0599129	0.103941	0.576411	1407	328.833	1078.17	62.0833	31.9167	0.0575823	0.0970603		6.40033
	arahy.Tifrunner.gnm1.ann1.UVRI66.2	AhAP2-25	AP2	arahy.Tifrunner.gnm1.ann1.QI820R.1	AhAP2-56	AP2	0.0446595	0.126058	0.354277	375	79	296	12.8333	9.16667	0.0433559	0.116034		7.7622
	arahy.Tifrunner.gnm1.ann1.V8I50K.1	AhAP2-27	AP2	arahy.Tifrunner.gnm1.ann1.GP73H9.1	AhAP2-58	AP2	0.00480771	0.0563506	0.0853178	1602	350	1252	6	19	0.00479233	0.0542857		3.46986
	arahy.Tifrunner.gnm1.ann1.F0M2KT.1	AhAP2-28	AP2	arahy.Tifrunner.gnm1.ann1.5MV2CV.1	AhAP2-59	AP2	0.00249636	0.0324375	0.0769592	1023	220.5	802.5	2	7	0.00249221	0.031746		1.99738
	arahy.Tifrunner.gnm1.ann1.H1PWIN.1	AhAP2-29	AP2	arahy.Tifrunner.gnm1.ann1.4G06NJ.2	AhAP2-45	AP2	0.180948	0.906052	0.19971	897	199.333	697.667	112.167	104.833	0.160774	0.52592		55.7914
	arahy.Tifrunner.gnm1.ann1.ULX5CX.1	AhAP2-31	AP2	arahy.Tifrunner.gnm1.ann1.6V99EA.1	AhAP2-43	AP2	0.307643	1.28871	0.238722	1392	304.917	1087.08	274.333	187.667	0.252357	0.615469		79.3539
	arahy.Tifrunner.gnm1.ann1.QEK7F9.1	AhAP2-36	AP2	arahy.Tifrunner.gnm1.ann1.YSN9W3.2	AhAP2-54	AP2	0.142766	0.586828	0.243284	1398	329.417	1068.58	138.917	134.083	0.130001	0.407033		36.1348
	arahy.Tifrunner.gnm1.ann1.PDF2MW.1	AhRAV-1	RAV	arahy.Tifrunner.gnm1.ann1.QDL5QZ.1	AhRAV-3	RAV	0.0010596	0.0454817	0.0232973	1239	294.583	944.417	1	13	0.00105886	0.0441301		2.8006
	arahy.Tifrunner.gnm1.ann1.R3D0LA.1	AhRAV-2	RAV	arahy.Tifrunner.gnm1.ann1.PZJ7B1.1	AhRAV-4	RAV	0.00770366	0.0504998	0.152548	1200	286.667	913.333	7	14	0.00766423	0.0488372		3.1096
	arahy.Tifrunner.gnm1.ann1.RCQ4HC.1	AhSoloist-1	Soloist	arahy.Tifrunner.gnm1.ann1.20QC9Q.1	AhSoloist-4	Soloist	0.00994833	0.0630529	0.157778	1041	231.5	809.5	8	14	0.00988264	0.0604752		3.88257
	arahy.Tifrunner.gnm1.ann1.L32FWB.1	AhSoloist-2	Soloist	arahy.Tifrunner.gnm1.ann1.ZH29RS.1	AhSoloist-5	Soloist	0.00594239	0.0426403	0.139361	1086	241.25	844.75	5	10	0.00591891	0.0414508		2.62563
	arahy.Tifrunner.gnm1.ann1.X2S259.1	AhDREB-19	DREB-III	arahy.Tifrunner.gnm1.ann1.YAEJ5M.1	AhDREB-41	III	0.0102173	0.0518192	0.197172	771	179.75	591.25	6	9	0.010148	0.0500695		3.19084
	arahy.Tifrunner.gnm1.ann1.K6GECI.1	AhDREB-2	DREB-III	arahy.Tifrunner.gnm1.ann1.VUU22W.1	AhDREB-24	III	0.0180417	0.0931696	0.193644	687	154.083	532.917	9.5	13.5	0.0178264	0.0876149		5.73704
	arahy.Tifrunner.gnm1.ann1.0IM2G4.1	AhDREB-7	DREB-III	arahy.Tifrunner.gnm1.ann1.RJA1IC.1	AhDREB-31	III	0.0181888	0.0418743	0.434365	555	133	422	7.58333	5.41667	0.01797	0.0407268		2.57847
	arahy.Tifrunner.gnm1.ann1.PSKQ19.1	AhDREB-9	DREB-III	arahy.Tifrunner.gnm1.ann1.X9M6WH.1	AhDREB-23	III	0.179054	1.51373	0.118286	495	122.5	372.5	59.3333	79.6667	0.159284	0.65034		93.2101
	arahy.Tifrunner.gnm1.ann1.VJ8B3Q.1	AhDREB-6	DREB-II	arahy.Tifrunner.gnm1.ann1.47NS3A.1	AhDREB-30	II	0.00278423	0.0349408	0.0796841	477	117.167	359.833	1	4	0.00277906	0.0341394		2.15153
	arahy.Tifrunner.gnm1.ann1.B20XFZ.1	AhDREB-10	DREB-IV	arahy.Tifrunner.gnm1.ann1.15RNTX.1	AhDREB-15	IV	0.454589	2.293	0.198251	693	157.167	535.833	182.667	112.333	0.340902	0.71474		141.194
	arahy.Tifrunner.gnm1.ann1.B20XFZ.1	AhDREB-10	DREB-IV	arahy.Tifrunner.gnm1.ann1.301SU2.1	AhDREB-32	IV	0.0100884	0.0450055	0.22416	759	160.25	598.75	6	7	0.0100209	0.0436817		2.77127
	arahy.Tifrunner.gnm1.ann1.73DHZN.1	AhDREB-12	DREB-IV	arahy.Tifrunner.gnm1.ann1.5KI8FH.1	AhDREB-35	IV	0.00975935	0.0327542	0.297957	1233	270.417	962.583	9.33333	8.66667	0.00969613	0.0320493		2.01689
	arahy.Tifrunner.gnm1.ann1.15RNTX.1	AhDREB-15	DREB-IV	arahy.Tifrunner.gnm1.ann1.301SU2.1	AhDREB-32	IV	0.471022	1.83322	0.256937	696	156.833	539.167	188.583	107.417	0.349768	0.68491		112.883
	arahy.Tifrunner.gnm1.ann1.3D7MPL.1	AhDREB-16	DREB-V	arahy.Tifrunner.gnm1.ann1.KDEH1Y.1	AhDREB-40	V	0.00938445	0.100438	0.0934353	744	154.25	589.75	5.5	14.5	0.00932599	0.0940032		6.18461
	arahy.Tifrunner.gnm1.ann1.KD4831.1	AhDREB-25	DREB-IV	arahy.Tifrunner.gnm1.ann1.KQL0FY.1	AhDREB-27	IV	0.390573	0.861027	0.453613	981	203.917	777.083	236.583	104.417	0.30445	0.512056		53.0189
	arahy.Tifrunner.gnm1.ann1.SE8WTS.1	AhDREB-3	DREB-IV	arahy.Tifrunner.gnm1.ann1.U8GE9Q.1	AhDREB-4	IV	0.44432	1.20798	0.367822	906	185.917	720.083	241.417	111.583	0.335262	0.600179		74.3827
	arahy.Tifrunner.gnm1.ann1.SE8WTS.1	AhDREB-3	DREB-IV	arahy.Tifrunner.gnm1.ann1.KD4831.1	AhDREB-25	IV	0.0128666	0.0279916	0.459661	1467	291.167	1175.83	15	8	0.0127569	0.0274757		1.72362
	arahy.Tifrunner.gnm1.ann1.SE8WTS.1	AhDREB-3	DREB-IV	arahy.Tifrunner.gnm1.ann1.KQL0FY.1	AhDREB-27	IV	0.381348	0.883606	0.431581	978	202.75	775.25	231.75	105.25	0.298936	0.519112		54.4092
	arahy.Tifrunner.gnm1.ann1.U8GE9Q.1	AhDREB-4	DREB-IV	arahy.Tifrunner.gnm1.ann1.KD4831.1	AhDREB-25	IV	0.429069	1.237	0.346863	873	181.833	691.167	225.833	110.167	0.326742	0.605866		76.1698
	arahy.Tifrunner.gnm1.ann1.U8GE9Q.1	AhDREB-4	DREB-IV	arahy.Tifrunner.gnm1.ann1.KQL0FY.1	AhDREB-27	IV	0.0953015	0.197837	0.481718	912	194.083	717.917	64.25	33.75	0.0894951	0.173894		12.1821
	arahy.Tifrunner.gnm1.ann1.JRIM60.1	AhDREB-11	DREB-V	arahy.Tifrunner.gnm1.ann1.2YN4P9.1	AhDREB-34	V	0.0228859	0.0609266	0.375631	594	128.167	465.833	10.5	7.5	0.0225403	0.0585176		3.75164
	arahy.Tifrunner.gnm1.ann1.G0YQ1S.1	AhERF-1	ERF-VI	arahy.Tifrunner.gnm1.ann1.Y7XFN8.1	AhERF-37	ERF-VI	0.00795763	0.0343759	0.231489	840	208.333	631.667	5	7	0.00791557	0.0336		2.11674
	arahy.Tifrunner.gnm1.ann1.3WAX0M.1	AhERF-17	ERF-VI	arahy.Tifrunner.gnm1.ann1.J6K2KY.1	AhERF-57	ERF-VI	0.0243275	0.0998241	0.243704	861	192.583	668.417	16	18	0.0239372	0.093466		6.1468
	arahy.Tifrunner.gnm1.ann1.PSW8JM.1	AhERF-2	ERF-VIII	arahy.Tifrunner.gnm1.ann1.PE2T0M.1	AhERF-38	ERF-VIII	0.0292937	0.0566307	0.517276	1497	348.333	1148.67	33	19	0.028729	0.0545455		3.48711
	arahy.Tifrunner.gnm1.ann1.2RQ41J.1	AhERF-21	ERF-VIII	arahy.Tifrunner.gnm1.ann1.K3BVMJ.1	AhERF-59	ERF-VIII	0.0154465	0.0855399	0.180577	852	197.917	654.083	10	16	0.0152886	0.0808421		5.26723
	arahy.Tifrunner.gnm1.ann1.JEZR1W.1	AhERF-23	ERF-VIII	arahy.Tifrunner.gnm1.ann1.8ZPK8F.1	AhERF-62	ERF-VIII	0.00198413	0.0354397	0.0559861	678	173.333	504.667	1	6	0.00198151	0.0346154		2.18225
	arahy.Tifrunner.gnm1.ann1.DY3CW6.1	AhERF-24	ERF-VIII	arahy.Tifrunner.gnm1.ann1.RX34PI.1	AhERF-63	ERF-VIII	0.00204464	0.038164	0.0535751	651	161.25	489.75	1	6	0.00204186	0.0372093		2.35
	arahy.Tifrunner.gnm1.ann1.C5BSUS.1	AhERF-30	ERF-VIII	arahy.Tifrunner.gnm1.ann1.ZQ3898.1	AhERF-70	ERF-VIII	0.00998351	0.0257168	0.38821	1044	237.333	806.667	8	6	0.00991735	0.0252809		1.58355
	arahy.Tifrunner.gnm1.ann1.QGFJ76.1	AhERF-33	ERF-VIII	arahy.Tifrunner.gnm1.ann1.4AG551.1	AhERF-43	ERF-VIII	0.515112	2.19488	0.234688	474	119.75	354.25	132	85	0.372618	0.709812		135.153
	arahy.Tifrunner.gnm1.ann1.QGFJ76.1	AhERF-33	ERF-VIII	arahy.Tifrunner.gnm1.ann1.AS0C7C.1	AhERF-73	ERF-VIII	0.00375941	0.0481127	0.0781375	705	171.667	533.333	2	8	0.00375	0.0466019		2.9626
	arahy.Tifrunner.gnm1.ann1.ILN3K9.1	AhERF-34	ERF-VIII	arahy.Tifrunner.gnm1.ann1.57AKVM.1	AhERF-74	ERF-VIII	0.0197822	0.0650389	0.30416	582	155.167	426.833	8.33333	9.66667	0.0195236	0.0622986		4.00486
	arahy.Tifrunner.gnm1.ann1.HGAZ7D.1	AhERF-40	ERF-VIII	arahy.Tifrunner.gnm1.ann1.L00VS1.1	AhERF-65	ERF-VIII	0.317814	1.34844	0.235691	630	149.417	480.583	124.5	93.5	0.25906	0.625767		83.0317
	arahy.Tifrunner.gnm1.ann1.WBA6PF.1	AhERF-7	ERF-VIII	arahy.Tifrunner.gnm1.ann1.8UYF3G.1	AhERF-44	ERF-VIII	0.0106996	0.0209657	0.510338	1089	241.833	847.167	9	5	0.0106236	0.0206754		1.29099
	arahy.Tifrunner.gnm1.ann1.F0BU8J.1	AhERF-8	ERF-VIII	arahy.Tifrunner.gnm1.ann1.DU9C9C.1	AhERF-45	ERF-VIII	0.0021978	0.0530022	0.0414663	612	156.333	455.667	1	8	0.00219459	0.0511727		3.26368
	arahy.Tifrunner.gnm1.ann1.J0DG7J.1	AhERF-28	ERF-VI-L	arahy.Tifrunner.gnm1.ann1.VG3SGX.1	AhERF-69	ERF-VI-L	0.00639118	0.0172669	0.370139	1020	234.333	785.667	5	4	0.00636402	0.0170697		1.06324
	arahy.Tifrunner.gnm1.ann1.WDSQ8J.1	AhERF-14	ERF-X	arahy.Tifrunner.gnm1.ann1.0UF999.1	AhERF-54	ERF-X	0.00821066	0.050311	0.163198	1380	339.083	1040.92	8.5	16.5	0.00816588	0.0486606		3.09797
	arahy.Tifrunner.gnm1.ann1.E9BLTS.1	AhERF-22	ERF-X	arahy.Tifrunner.gnm1.ann1.I2ZHTU.1	AhERF-60	ERF-X	0.028599	0.0565988	0.505294	876	204.833	671.167	18.8333	11.1667	0.0280606	0.0545159		3.48515
	arahy.Tifrunner.gnm1.ann1.2Q12N5.1	AhERF-26	ERF-X	arahy.Tifrunner.gnm1.ann1.B66PX0.1	AhERF-66	ERF-X	0.0322732	0.105934	0.304655	690	151.833	538.167	17	15	0.0315887	0.0987925		6.52301
	arahy.Tifrunner.gnm1.ann1.P2THRP.1	AhERF-29	ERF-X	arahy.Tifrunner.gnm1.ann1.2Y0GDL.1	AhERF-68	ERF-X	0.0758205	0.161624	0.469115	1083	257.917	825.083	59.5	37.5	0.0721139	0.145396		9.95224
	arahy.Tifrunner.gnm1.ann1.768P1R.1	AhERF-35	ERF-X	arahy.Tifrunner.gnm1.ann1.F2D5GR.1	AhERF-42	ERF-X	0.431669	1.09052	0.395838	867	216.75	650.25	213.417	124.583	0.328207	0.574779		67.1502
	arahy.Tifrunner.gnm1.ann1.768P1R.1	AhERF-35	ERF-X	arahy.Tifrunner.gnm1.ann1.EZ5RGK.1	AhERF-76	ERF-X	0.0249503	0.0895632	0.278578	1023	248.75	774.25	19	21	0.0245399	0.0844221		5.51497
	arahy.Tifrunner.gnm1.ann1.F2D5GR.1	AhERF-42	ERF-X	arahy.Tifrunner.gnm1.ann1.EZ5RGK.1	AhERF-76	ERF-X	0.416046	0.912766	0.455808	867	216.417	650.583	207.75	114.25	0.319329	0.527917		56.2048
	arahy.Tifrunner.gnm1.ann1.2AHI7R.1	AhERF-6	ERF-X	arahy.Tifrunner.gnm1.ann1.F2D5GR.1	AhERF-42	ERF-X	0.00873266	0.0223647	0.390467	918	226.917	691.083	6	5	0.00868202	0.0220345		1.37714
	arahy.Tifrunner.gnm1.ann1.ZJ433C.1	AhERF-15	ERF-VII	arahy.Tifrunner.gnm1.ann1.MMX4MC.1	AhERF-58	ERF-VII	0.00116302	0.0158213	0.0735096	1116	255.5	860.5	1	4	0.00116212	0.0156556		0.974217
	arahy.Tifrunner.gnm1.ann1.GP7L65.1	AhERF-20	ERF-VII	arahy.Tifrunner.gnm1.ann1.DRB5KP.1	AhERF-56	ERF-VII	0.0115	0.066257	0.173566	906	205	701	8	13	0.0114123	0.0634146		4.07986
	arahy.Tifrunner.gnm1.ann1.VF7WU9.1	AhERF-4	ERF-VII	arahy.Tifrunner.gnm1.ann1.GGDF5U.1	AhERF-39	ERF-VII	0.0077685	0.0502928	0.154465	1173	267.25	905.75	7	13	0.0077284	0.0486436		3.09685
	arahy.Tifrunner.gnm1.ann1.KF0N62.1	AhERF-27	ERF-IX	arahy.Tifrunner.gnm1.ann1.87AL67.1	AhERF-67	ERF-IX	0.0221255	0.0241308	0.9169	585	126.333	458.667	10	3	0.0218023	0.0237467		1.48588
	arahy.Tifrunner.gnm1.ann1.T22KDW.1	AhERF-31	ERF-IX	arahy.Tifrunner.gnm1.ann1.EAK3RU.1	AhERF-71	ERF-IX	0.0289934	0.0872889	0.332154	744	163.833	580.167	16.5	13.5	0.0284401	0.0824008		5.37493
Mean							0.0192103	0.0619897	0.244584	1014	220.5	777.083	14	14.5	0.0189664	0.0604752		3.8171
								2.293
								0.00888461

## Sheet: Table S6
	Supplementary Table S6. The Ka/Ks ratios and estimated divergence time for orthologous AP2/ERF genes between A. hypogaea cv. Tifrunner and A. duranensis.
	Gene name	PeanutBase Locus Identifier	Fanily-Group	PeanutBase Locus Identifier	Ka	Ks	Ka_Ks	EffectiveLen	AverageS-sites	AverageN-sites	cN	cS	pN	pS	Note	Mya
	AhAP2-5	arahy.Tifrunner.gnm1.ann1.K6QUG2.1	AP2	aradu.V14167.gnm1.ann1.Aradu.42K79.1	0	0	NaN	1452	339.333	1112.67	0	0	0	0		NaN
	AhAP2-45	arahy.Tifrunner.gnm1.ann1.4G06NJ.2	AP2	aradu.V14167.gnm1.ann1.Aradu.SE6Q0.1	NaN	NaN	NaN	1152	268.833	881.667	NaN	NaN	NaN	NaN		NaN
	AhAP2-15	arahy.Tifrunner.gnm1.ann1.00XS3D.1	AP2	aradu.V14167.gnm1.ann1.Aradu.SE6Q0.1	NaN	NaN	NaN	1224	287.75	934.75	NaN	NaN	NaN	NaN		NaN
	AhDREB-29	arahy.Tifrunner.gnm1.ann1.452FBF.1	DREB-III	aradu.V14167.gnm1.ann1.Aradu.KM0LY.1	0	0	NaN	168	34.5	133.5	0	0	0	0		NaN
	AhDREB-5	arahy.Tifrunner.gnm1.ann1.FAI7YU.1	DREB-III	aradu.V14167.gnm1.ann1.Aradu.KM0LY.1	0	0	NaN	168	34.5	133.5	0	0	0	0		NaN
	AhDREB-6	arahy.Tifrunner.gnm1.ann1.VJ8B3Q.1	DREB-II	aradu.V14167.gnm1.ann1.Aradu.JEC4J.1	0	0	NaN	339	79.6667	259.333	0	0	0	0		NaN
	AhDREB-9	arahy.Tifrunner.gnm1.ann1.PSKQ19.1	DREB-III	aradu.V14167.gnm1.ann1.Aradu.8U98A.1	0.00630919	0	#NAME?	420	101.667	318.333	2	0	0.00628272	0		NaN
	AhERF-30	arahy.Tifrunner.gnm1.ann1.C5BSUS.1	ERF-VIII	aradu.V14167.gnm1.ann1.Aradu.3Q82R.1	0	0	NaN	1065	241.833	823.167	0	0	0	0		NaN
	AhERF-24	arahy.Tifrunner.gnm1.ann1.DY3CW6.1	ERF-VIII	aradu.V14167.gnm1.ann1.Aradu.PM527.1	0	0	NaN	258	62.3333	195.667	0	0	0	0		NaN
	AhERF-36	arahy.Tifrunner.gnm1.ann1.768P1R.2	ERF-X	aradu.V14167.gnm1.ann1.Aradu.ME4LN.1	0.00126502	0	#NAME?	1044	252.833	791.167	1	0	0.00126396	0		NaN
	AhERF-15	arahy.Tifrunner.gnm1.ann1.ZJ433C.1	ERF-VII	aradu.V14167.gnm1.ann1.Aradu.00XL9.1	0	0	NaN	1116	255	861	0	0	0	0		NaN
	AhERF-18	arahy.Tifrunner.gnm1.ann1.LF78J6.1	ERF-IX	aradu.V14167.gnm1.ann1.Aradu.3R22E.1	0	0	NaN	480	102.167	377.833	0	0	0	0		NaN
	AhAP2-37	arahy.Tifrunner.gnm1.ann1.L4Q0K2.1	AP2	aradu.V14167.gnm1.ann1.Aradu.VJK1R.1	0.0215644	0.052765	0.408687	1296	284.583	1011.42	21.5	14.5	0.0212573	0.0509517		3.24908
	AhAP2-6	arahy.Tifrunner.gnm1.ann1.TN1J43.1	AP2	aradu.V14167.gnm1.ann1.Aradu.F9X01.1	0.291118	1.12781	0.258127	1092	247.167	844.833	203.833	144.167	0.24127	0.583277		69.4461
	AhAP2-6	arahy.Tifrunner.gnm1.ann1.TN1J43.1	AP2	aradu.V14167.gnm1.ann1.Aradu.VJK1R.1	0.00293662	0.0176013	0.166841	1311	287.417	1023.58	3	5	0.00293088	0.0173963		1.08382
	AhAP2-10	arahy.Tifrunner.gnm1.ann1.6BK6B8.1	AP2	aradu.V14167.gnm1.ann1.Aradu.M2I8I.1	0.0154663	0.0231236	0.668856	2118	479.417	1638.58	25.0833	10.9167	0.0153079	0.0227707		1.42386
	AhAP2-10	arahy.Tifrunner.gnm1.ann1.6BK6B8.1	AP2	aradu.V14167.gnm1.ann1.Aradu.T7UUH.1	0.696643	2.59787	0.26816	1095	260.833	834.167	378.5	189.5	0.453746	0.726518		159.967
	AhAP2-35	arahy.Tifrunner.gnm1.ann1.XI0ITM.1	AP2	aradu.V14167.gnm1.ann1.Aradu.T7UUH.1	0.0237075	0.0660621	0.358867	1083	268.833	814.167	19	17	0.0233367	0.0632362		4.06786
	AhAP2-40	arahy.Tifrunner.gnm1.ann1.HP6LSM.1	AP2	aradu.V14167.gnm1.ann1.Aradu.M2I8I.1	0.00654812	0.0550495	0.11895	1986	452.167	1533.83	10	24	0.00651961	0.0530778		3.38975
	AhAP2-23	arahy.Tifrunner.gnm1.ann1.ETC6KF.1	AP2	aradu.V14167.gnm1.ann1.Aradu.VJK1R.1	0.302072	1.67147	0.180722	1167	258.75	908.25	225.833	173.167	0.248647	0.669243		102.923
	AhAP2-23	arahy.Tifrunner.gnm1.ann1.ETC6KF.1	AP2	aradu.V14167.gnm1.ann1.Aradu.F9X01.1	0.0220224	0.0428819	0.51356	1215	281.917	933.083	20.25	11.75	0.0217022	0.041679		2.64051
	AhAP2-42	arahy.Tifrunner.gnm1.ann1.N9BW0I.1	AP2	aradu.V14167.gnm1.ann1.Aradu.0KB9D.1	0.0324215	0.0249154	1.30126	1368	333.25	1034.75	32.8333	8.16667	0.0317307	0.0245061		1.5342
	AhAP2-13	arahy.Tifrunner.gnm1.ann1.RWA9J9.1	AP2	aradu.V14167.gnm1.ann1.Aradu.0KB9D.1	0.0324215	0.0249154	1.30126	1368	333.25	1034.75	32.8333	8.16667	0.0317307	0.0245061		1.5342
	AhAP2-38	arahy.Tifrunner.gnm1.ann1.WU5RMI.1	AP2	aradu.V14167.gnm1.ann1.Aradu.QYV19.1	0.217616	0.242609	0.89698	900	217.5	682.5	128.917	45.0833	0.188889	0.20728		14.939
	AhAP2-8	arahy.Tifrunner.gnm1.ann1.RN6KV5.2	AP2	aradu.V14167.gnm1.ann1.Aradu.QYV19.1	0.199677	0.224893	0.887875	906	219.583	686.417	120.333	42.6667	0.175307	0.194307		13.8481
	AhAP2-58	arahy.Tifrunner.gnm1.ann1.GP73H9.1	AP2	aradu.V14167.gnm1.ann1.Aradu.C5HAC.1	0.0430085	0.0940472	0.457308	1518	333.75	1184.25	49.5	29.5	0.0417986	0.0883895		5.79108
	AhAP2-27	arahy.Tifrunner.gnm1.ann1.V8I50K.1	AP2	aradu.V14167.gnm1.ann1.Aradu.C5HAC.1	0.0375699	0.0511166	0.734985	1521	333.917	1187.08	43.5	16.5	0.0366444	0.0494135		3.14757
	AhAP2-52	arahy.Tifrunner.gnm1.ann1.J9H0YQ.1	AP2	aradu.V14167.gnm1.ann1.Aradu.UA79E.1	0.0103385	0.0230281	0.448951	1380	308.667	1071.33	11	7	0.0102676	0.0226782		1.41799
	AhAP2-21	arahy.Tifrunner.gnm1.ann1.9T6609.1	AP2	aradu.V14167.gnm1.ann1.Aradu.GG3LG.1	0.00128576	0.0122602	0.104873	1968	411.167	1556.83	2	5	0.00128466	0.0121605		0.754937
	AhAP2-51	arahy.Tifrunner.gnm1.ann1.ZL8GWI.1	AP2	aradu.V14167.gnm1.ann1.Aradu.GG3LG.1	0.00859608	0.0379828	0.226315	1926	405	1521	13	15	0.00854701	0.037037		2.33884
	AhAP2-22	arahy.Tifrunner.gnm1.ann1.7SA24Y.1	AP2	aradu.V14167.gnm1.ann1.Aradu.UA79E.1	0	0.00322408	0	1389	310.833	1078.17	0	1	0	0.00321716		0.198527
	AhAP2-2	arahy.Tifrunner.gnm1.ann1.M71NXQ.1	AP2	aradu.V14167.gnm1.ann1.Aradu.S9CWT.1	0.32648	1.39201	0.234539	1203	270.5	932.5	246.833	171.167	0.264701	0.632779		85.7148
	AhAP2-2	arahy.Tifrunner.gnm1.ann1.M71NXQ.1	AP2	aradu.V14167.gnm1.ann1.Aradu.V7CSH.1	0.0351885	0.0487269	0.722157	1344	296.75	1047.25	36	14	0.0343757	0.0471778		3.00043
	AhAP2-31	arahy.Tifrunner.gnm1.ann1.ULX5CX.1	AP2	aradu.V14167.gnm1.ann1.Aradu.S9CWT.1	0.333504	1.49101	0.223676	1215	272.167	942.833	253.833	176.167	0.269224	0.647275		91.8111
	AhAP2-31	arahy.Tifrunner.gnm1.ann1.ULX5CX.1	AP2	aradu.V14167.gnm1.ann1.Aradu.V7CSH.1	0.0422542	0.103581	0.407933	1329	294.583	1034.42	42.5	28.5	0.041086	0.0967468		6.37816
	AhAP2-43	arahy.Tifrunner.gnm1.ann1.6V99EA.1	AP2	aradu.V14167.gnm1.ann1.Aradu.S9CWT.1	0.0114361	0.0165936	0.689185	1362	304.667	1057.33	12	5	0.0113493	0.0164114		1.02177
	AhAP2-43	arahy.Tifrunner.gnm1.ann1.6V99EA.1	AP2	aradu.V14167.gnm1.ann1.Aradu.V7CSH.1	0.360414	1.45976	0.2469	1173	256	917	262.417	164.583	0.286169	0.642904		89.8866
	AhAP2-59	arahy.Tifrunner.gnm1.ann1.5MV2CV.1	AP2	aradu.V14167.gnm1.ann1.Aradu.5AV3M.1	0.454001	1.75747	0.258326	495	107.917	387.083	131.833	73.1667	0.340581	0.677992		108.219
	AhAP2-59	arahy.Tifrunner.gnm1.ann1.5MV2CV.1	AP2	aradu.V14167.gnm1.ann1.Aradu.387PF.1	0.00262985	0.0428348	0.0613952	978	216.167	761.833	2	9	0.00262525	0.0416345		2.63761
	AhAP2-28	arahy.Tifrunner.gnm1.ann1.F0M2KT.1	AP2	aradu.V14167.gnm1.ann1.Aradu.5AV3M.1	0.447981	1.88539	0.237607	495	108.083	386.917	130.5	74.5	0.337282	0.689283		116.095
	AhAP2-28	arahy.Tifrunner.gnm1.ann1.F0M2KT.1	AP2	aradu.V14167.gnm1.ann1.Aradu.387PF.1	0	0.00928804	0	978	216.667	761.333	0	2	0	0.00923077		0.571924
	AhAP2-12	arahy.Tifrunner.gnm1.ann1.F5Q2PM.1	AP2	aradu.V14167.gnm1.ann1.Aradu.387PF.1	0.222744	1.15388	0.193039	942	205.583	736.417	141.917	121.083	0.192712	0.588974		71.0519
	AhAP2-12	arahy.Tifrunner.gnm1.ann1.F5Q2PM.1	AP2	aradu.V14167.gnm1.ann1.Aradu.G1CDJ.1	0.0295397	0.0713159	0.414209	852	187.417	664.583	19.25	12.75	0.0289655	0.0680302		4.39137
	AhAP2-41	arahy.Tifrunner.gnm1.ann1.I3YYWX.1	AP2	aradu.V14167.gnm1.ann1.Aradu.G1CDJ.1	0.0259067	0.0580064	0.446618	870	192.583	677.417	17.25	10.75	0.0254644	0.05582		3.57182
	AhAP2-25	arahy.Tifrunner.gnm1.ann1.UVRI66.2	AP2	aradu.V14167.gnm1.ann1.Aradu.EJI6Q.1	0.0514277	0.119669	0.429748	978	203.417	774.583	38.5	22.5	0.0497041	0.11061		7.36881
	AhAP2-49	arahy.Tifrunner.gnm1.ann1.6MJ8Q6.1	AP2	aradu.V14167.gnm1.ann1.Aradu.0KI78.1	0.0205565	0.0454685	0.452103	1245	283.333	961.667	19.5	12.5	0.0202773	0.0441176		2.79978
	AhAP2-17	arahy.Tifrunner.gnm1.ann1.AE6IJA.1	AP2	aradu.V14167.gnm1.ann1.Aradu.0KI78.1	0.0205565	0.034302	0.599278	1245	283.333	961.667	19.5	9.5	0.0202773	0.0335294		2.11219
	AhAP2-26	arahy.Tifrunner.gnm1.ann1.Y9PZ1H.1	AP2	aradu.V14167.gnm1.ann1.Aradu.P6UBG.1	0.0490342	0.0699912	0.700577	771	175.833	595.167	28.25	11.75	0.0474657	0.0668246		4.3098
	AhAP2-33	arahy.Tifrunner.gnm1.ann1.HG2532.2	AP2	aradu.V14167.gnm1.ann1.Aradu.A4KG4.1	0.0220166	0.0517766	0.425223	693	139.917	553.083	12	7	0.0216965	0.0500298		3.18821
	AhAP2-4	arahy.Tifrunner.gnm1.ann1.KP68JR.1	AP2	aradu.V14167.gnm1.ann1.Aradu.A4KG4.1	0.0161369	0.0215455	0.748969	705	141.25	563.75	9	3	0.0159645	0.0212389		1.32669
	AhAP2-29	arahy.Tifrunner.gnm1.ann1.H1PWIN.1	AP2	aradu.V14167.gnm1.ann1.Aradu.RG31X.1	0.0819928	0.135196	0.606472	762	169.75	592.25	46	21	0.0776699	0.123711		8.3249
	AhAP2-5	arahy.Tifrunner.gnm1.ann1.K6QUG2.1	AP2	aradu.V14167.gnm1.ann1.Aradu.GIP2Q.1	0.145159	0.665443	0.21814	741	172.083	568.917	75.0833	75.9167	0.131976	0.441162		40.9755
	AhAP2-36	arahy.Tifrunner.gnm1.ann1.QEK7F9.1	AP2	aradu.V14167.gnm1.ann1.Aradu.GIP2Q.1	0.142058	0.670431	0.211891	741	172.417	568.583	73.5833	76.4167	0.129415	0.443209		41.2827
	AhAP2-36	arahy.Tifrunner.gnm1.ann1.QEK7F9.1	AP2	aradu.V14167.gnm1.ann1.Aradu.42K79.1	0.00360469	0.00888461	0.405723	1452	339.667	1112.33	4	3	0.00359604	0.00883219		0.547082
	AhAP2-50	arahy.Tifrunner.gnm1.ann1.38RLY4.1	AP2	aradu.V14167.gnm1.ann1.Aradu.G5NTR.1	0.0713564	0.0700238	1.01903	531	118.417	412.583	28.0833	7.91667	0.0680671	0.0668543		4.31181
	AhAP2-45	arahy.Tifrunner.gnm1.ann1.4G06NJ.2	AP2	aradu.V14167.gnm1.ann1.Aradu.RG31X.1	0.193155	1.17852	0.163897	1047	237.583	809.417	137.833	141.167	0.170287	0.594177		72.5688
	AhAP2-15	arahy.Tifrunner.gnm1.ann1.00XS3D.1	AP2	aradu.V14167.gnm1.ann1.Aradu.RG31X.1	0.214947	1.14903	0.187069	1116	255.417	860.583	160.833	150.167	0.186889	0.587928		70.7528
	AhAP2-19	arahy.Tifrunner.gnm1.ann1.MRL478.1	AP2	aradu.V14167.gnm1.ann1.Aradu.G5NTR.1	0.0635356	0.0695111	0.914036	531	119.25	411.75	25.0833	7.91667	0.0609188	0.0663871		4.28024
	AhAP2-24	arahy.Tifrunner.gnm1.ann1.KDI7TH.1	AP2	aradu.V14167.gnm1.ann1.Aradu.GIP2Q.1	0.118116	0.158241	0.74643	786	182.833	603.167	65.9167	26.0833	0.109284	0.142662		9.74388
	AhAP2-24	arahy.Tifrunner.gnm1.ann1.KDI7TH.1	AP2	aradu.V14167.gnm1.ann1.Aradu.42K79.1	0.223382	0.772654	0.28911	1338	313.083	1024.92	198	151	0.193186	0.4823		47.5772
	AhAP2-54	arahy.Tifrunner.gnm1.ann1.YSN9W3.2	AP2	aradu.V14167.gnm1.ann1.Aradu.GIP2Q.1	0.0116945	0.0110245	1.06077	786	182.75	603.25	7	2	0.0116038	0.0109439		0.678851
	AhAP2-54	arahy.Tifrunner.gnm1.ann1.YSN9W3.2	AP2	aradu.V14167.gnm1.ann1.Aradu.42K79.1	0.14742	0.583517	0.252641	1401	329.417	1071.58	143.417	133.583	0.133836	0.405515		35.9308
	AhRAV-1	arahy.Tifrunner.gnm1.ann1.PDF2MW.1	RAV	aradu.V14167.gnm1.ann1.Aradu.7AQ1B.1	0.0146262	0.0351897	0.415638	1146	271.5	874.5	12.6667	9.33333	0.0144845	0.0343769		2.16685
	AhRAV-3	arahy.Tifrunner.gnm1.ann1.QDL5QZ.1	RAV	aradu.V14167.gnm1.ann1.Aradu.7AQ1B.1	0.0157946	0.0788755	0.200247	1146	271.583	874.417	13.6667	20.3333	0.0156295	0.0748696		4.85687
	AhSoloist-4	arahy.Tifrunner.gnm1.ann1.20QC9Q.1	Soloist	aradu.V14167.gnm1.ann1.Aradu.0N117.1	0.013665	0.077224	0.176952	1044	231.667	812.333	11	17	0.0135412	0.0733813		4.75517
	AhSoloist-1	arahy.Tifrunner.gnm1.ann1.RCQ4HC.1	Soloist	aradu.V14167.gnm1.ann1.Aradu.0N117.1	0.0260587	0.0709848	0.367102	1110	251	859	22	17	0.0256112	0.0677291		4.37098
	AhSoloist-2	arahy.Tifrunner.gnm1.ann1.L32FWB.1	Soloist	aradu.V14167.gnm1.ann1.Aradu.0N117.1	0.902316	2.19553	0.41098	939	206.5	732.5	384.417	146.583	0.524801	0.709847		135.192
	AhSoloist-5	arahy.Tifrunner.gnm1.ann1.ZH29RS.1	Soloist	aradu.V14167.gnm1.ann1.Aradu.UTD2W.1	0.00594239	0.0339161	0.175209	1086	241.25	844.75	5	8	0.00591891	0.0331606		2.08843
	AhDREB-23	arahy.Tifrunner.gnm1.ann1.X9M6WH.1	DREB-III	aradu.V14167.gnm1.ann1.Aradu.8U98A.1	0.200845	1.45294	0.138234	411	102.167	308.833	54.4167	65.5833	0.176201	0.641925		89.4665
	AhDREB-19	arahy.Tifrunner.gnm1.ann1.X2S259.1	DREB-III	aradu.V14167.gnm1.ann1.Aradu.1ZX0E.1	0.20462	0.465714	0.439367	555	128.75	426.25	76.3333	44.6667	0.179081	0.346926		28.677
	AhDREB-41	arahy.Tifrunner.gnm1.ann1.YAEJ5M.1	DREB-III	aradu.V14167.gnm1.ann1.Aradu.1ZX0E.1	0.193075	0.396306	0.487187	549	127.5	421.5	71.75	39.25	0.170225	0.307843		24.4031
	AhDREB-30	arahy.Tifrunner.gnm1.ann1.47NS3A.1	DREB-II	aradu.V14167.gnm1.ann1.Aradu.JEC4J.1	0	0.0386352	0	339	79.6667	259.333	0	3	0	0.0376569		2.37901
	AhDREB-10	arahy.Tifrunner.gnm1.ann1.B20XFZ.1	DREB-I	aradu.V14167.gnm1.ann1.Aradu.9P5WT.1	0.488186	2.68532	0.181798	714	161.5	552.5	198.25	117.75	0.358824	0.729102		165.352
	AhDREB-10	arahy.Tifrunner.gnm1.ann1.B20XFZ.1	DREB-I	aradu.V14167.gnm1.ann1.Aradu.61RDF.1	0.041338	0.106609	0.387752	354	80.5	273.5	11	8	0.0402194	0.0993789		6.56461
	AhDREB-13	arahy.Tifrunner.gnm1.ann1.XJX19T.1	DREB-I	aradu.V14167.gnm1.ann1.Aradu.88AFG.1	0.00119856	0.012346	0.0970813	1080	245	835	1	3	0.00119761	0.0122449		0.760219
	AhDREB-11	arahy.Tifrunner.gnm1.ann1.JRIM60.1	DREB-IV	aradu.V14167.gnm1.ann1.Aradu.14Z9Y.1	0.0194606	0.0317928	0.612105	597	128.5	468.5	9	4	0.0192102	0.0311284		1.95769
	AhDREB-27	arahy.Tifrunner.gnm1.ann1.KQL0FY.1	DREB-IV	aradu.V14167.gnm1.ann1.Aradu.1VU63.1	0.149003	0.231226	0.644404	936	196	740	100	39	0.135135	0.19898		14.2381
	AhDREB-4	arahy.Tifrunner.gnm1.ann1.U8GE9Q.1	DREB-IV	aradu.V14167.gnm1.ann1.Aradu.1VU63.1	0.12714	0.136406	0.932069	894	186.417	707.583	82.75	23.25	0.116947	0.124721		8.39938
	AhDREB-25	arahy.Tifrunner.gnm1.ann1.KD4831.1	DREB-IV	aradu.V14167.gnm1.ann1.Aradu.1VU63.1	0.503877	1.32149	0.381293	1116	226.167	889.833	326.5	140.5	0.366923	0.621223		81.3728
	AhDREB-39	arahy.Tifrunner.gnm1.ann1.L5HMHT.1	DREB-IV	aradu.V14167.gnm1.ann1.Aradu.IRG5E.1	0.0051937	0.0514855	0.100877	507	120.583	386.417	2	6	0.00517576	0.0497581		3.17029
	AhDREB-35	arahy.Tifrunner.gnm1.ann1.5KI8FH.1	DREB-IV	aradu.V14167.gnm1.ann1.Aradu.9SR9S.1	0.0063498	0.0228953	0.277341	1215	266.083	948.917	6	6	0.006323	0.0225493		1.40981
	AhDREB-12	arahy.Tifrunner.gnm1.ann1.73DHZN.1	DREB-IV	aradu.V14167.gnm1.ann1.Aradu.9SR9S.1	0.00422462	0.0152193	0.277583	1215	265.5	949.5	4	4	0.00421274	0.0150659		0.937149
	AhDREB-15	arahy.Tifrunner.gnm1.ann1.15RNTX.1	DREB-IV	aradu.V14167.gnm1.ann1.Aradu.9P5WT.1	0.00181488	0.0117649	0.154262	723	171.333	551.667	1	2	0.00181269	0.0116732		0.724443
	AhDREB-15	arahy.Tifrunner.gnm1.ann1.15RNTX.1	DREB-IV	aradu.V14167.gnm1.ann1.Aradu.61RDF.1	0.209648	1.07017	0.195903	348	81	267	48.8333	46.1667	0.182896	0.569959		65.8969
	AhDREB-32	arahy.Tifrunner.gnm1.ann1.301SU2.1	DREB-IV	aradu.V14167.gnm1.ann1.Aradu.9P5WT.1	0.499116	1.80876	0.275944	717	162.333	554.667	202.167	110.833	0.364483	0.682752		111.377
	AhDREB-32	arahy.Tifrunner.gnm1.ann1.301SU2.1	DREB-IV	aradu.V14167.gnm1.ann1.Aradu.61RDF.1	0.052952	0.166968	0.317139	354	80.1667	273.833	14	12	0.051126	0.149688		10.2813
	AhDREB-14	arahy.Tifrunner.gnm1.ann1.8V3MXA.1	DREB-V	aradu.V14167.gnm1.ann1.Aradu.W4PMX.1	0	0.0236862	0	564	128.667	435.333	0	3	0	0.0233161		1.45851
	AhDREB-36	arahy.Tifrunner.gnm1.ann1.P2AB97.1	DREB-V	aradu.V14167.gnm1.ann1.Aradu.W4PMX.1	0	0.0236862	0	564	128.667	435.333	0	3	0	0.0233161		1.45851
	AhDREB-1	arahy.Tifrunner.gnm1.ann1.CSV6ZK.1	DREB-V	aradu.V14167.gnm1.ann1.Aradu.D814J.1	0	0.0309641	0	717	164.833	552.167	0	5	0	0.0303337		1.90666
	AhDREB-16	arahy.Tifrunner.gnm1.ann1.3D7MPL.1	DREB-V	aradu.V14167.gnm1.ann1.Aradu.MIW9U.1	0.00332227	0.0256435	0.129556	762	158.667	603.333	2	4	0.00331492	0.0252101		1.57903
	AhDREB-40	arahy.Tifrunner.gnm1.ann1.KDEH1Y.1	DREB-V	aradu.V14167.gnm1.ann1.Aradu.MIW9U.1	0.0111097	0.0783468	0.141802	744	154.583	589.417	6.5	11.5	0.0110279	0.0743935		4.82431
	AhDREB-18	arahy.Tifrunner.gnm1.ann1.VHG0QP.1	DREB-V	aradu.V14167.gnm1.ann1.Aradu.D4PZ8.1	0.00202908	0.00705058	0.28779	636	142.5	493.5	1	1	0.00202634	0.00701754		0.434149
	AhDREB-34	arahy.Tifrunner.gnm1.ann1.2YN4P9.1	DREB-V	aradu.V14167.gnm1.ann1.Aradu.14Z9Y.1	0.00433527	0.0736286	0.0588803	591	128.333	462.667	2	9	0.00432277	0.0701299		4.53378
	AhERF-37	arahy.Tifrunner.gnm1.ann1.Y7XFN8.1	ERF-VI	aradu.V14167.gnm1.ann1.Aradu.83Z01.1	0.00638641	0.0294155	0.21711	837	208	629	4	6	0.0063593	0.0288462		1.8113
	AhERF-1	arahy.Tifrunner.gnm1.ann1.G0YQ1S.1	ERF-VI	aradu.V14167.gnm1.ann1.Aradu.83Z01.1	0.00159109	0.00482705	0.32962	837	207.833	629.167	1	1	0.0015894	0.00481155		0.297232
	AhERF-17	arahy.Tifrunner.gnm1.ann1.3WAX0M.1	ERF-VI	aradu.V14167.gnm1.ann1.Aradu.I9TTZ.1	0.00286944	0.0201017	0.142746	900	201.667	698.333	2	4	0.00286396	0.0198347		1.23779
	AhERF-57	arahy.Tifrunner.gnm1.ann1.J6K2KY.1	ERF-VI	aradu.V14167.gnm1.ann1.Aradu.I9TTZ.1	0.0258745	0.0998241	0.259201	861	192.583	668.417	17	18	0.0254332	0.093466		6.1468
	AhERF-25	arahy.Tifrunner.gnm1.ann1.Q66BD2.1	ERF-VIII	aradu.V14167.gnm1.ann1.Aradu.C87QH.1	0	0.00365409	0	1215	274.333	940.667	0	1	0	0.0036452		0.225005
	AhERF-2	arahy.Tifrunner.gnm1.ann1.PSW8JM.1	ERF-VIII	aradu.V14167.gnm1.ann1.Aradu.W6X5V.1	0.014866	0.00859403	1.72981	1506	351.083	1154.92	17	3	0.0147197	0.00854498		0.529189
	AhERF-38	arahy.Tifrunner.gnm1.ann1.PE2T0M.1	ERF-VIII	aradu.V14167.gnm1.ann1.Aradu.W6X5V.1	0.0291277	0.0531326	0.548208	1506	350.917	1155.08	33	18	0.0285694	0.0512942		3.27171
	AhERF-70	arahy.Tifrunner.gnm1.ann1.ZQ3898.1	ERF-VIII	aradu.V14167.gnm1.ann1.Aradu.3Q82R.1	0.00998351	0.0257168	0.38821	1044	237.333	806.667	8	6	0.00991735	0.0252809		1.58355
	AhERF-74	arahy.Tifrunner.gnm1.ann1.57AKVM.1	ERF-VIII	aradu.V14167.gnm1.ann1.Aradu.X3GS1.1	0.0106806	0.0640839	0.166665	579	154.667	424.333	4.5	9.5	0.0106049	0.0614224		3.94605
	AhERF-34	arahy.Tifrunner.gnm1.ann1.ILN3K9.1	ERF-VIII	aradu.V14167.gnm1.ann1.Aradu.X3GS1.1	0.0174634	0.0514551	0.339391	579	154.167	424.833	7.33333	7.66667	0.0172617	0.0497297		3.16842
	AhERF-43	arahy.Tifrunner.gnm1.ann1.4AG551.1	ERF-VIII	aradu.V14167.gnm1.ann1.Aradu.E2TII.1	0.513711	2.66756	0.192577	474	119.75	354.25	131.75	87.25	0.371912	0.728601		164.258
	AhERF-73	arahy.Tifrunner.gnm1.ann1.AS0C7C.1	ERF-VIII	aradu.V14167.gnm1.ann1.Aradu.E2TII.1	0.0056462	0.0236706	0.238532	705	171.667	533.333	3	4	0.005625	0.023301		1.45755
	AhERF-33	arahy.Tifrunner.gnm1.ann1.QGFJ76.1	ERF-VIII	aradu.V14167.gnm1.ann1.Aradu.E2TII.1	0.00187735	0.0357921	0.0524515	705	171.667	533.333	1	6	0.001875	0.0349515		2.20395
	AhERF-62	arahy.Tifrunner.gnm1.ann1.8ZPK8F.1	ERF-VIII	aradu.V14167.gnm1.ann1.Aradu.3P75R.1	0.00397549	0.0414511	0.095908	678	173.583	504.417	2	7	0.00396498	0.0403265		2.55241
	AhERF-23	arahy.Tifrunner.gnm1.ann1.JEZR1W.1	ERF-VIII	aradu.V14167.gnm1.ann1.Aradu.3P75R.1	0.00198643	0.0174511	0.113828	678	173.917	504.083	1	3	0.0019838	0.0172496		1.07458
	AhERF-45	arahy.Tifrunner.gnm1.ann1.DU9C9C.1	ERF-VIII	aradu.V14167.gnm1.ann1.Aradu.QQ9LA.1	0.0021978	0.0530022	0.0414663	612	156.333	455.667	1	8	0.00219459	0.0511727		3.26368
	AhERF-8	arahy.Tifrunner.gnm1.ann1.F0BU8J.1	ERF-VIII	aradu.V14167.gnm1.ann1.Aradu.QQ9LA.1	0	0.0129035	0	612	156.333	455.667	0	2	0	0.0127932		0.794553
	AhERF-63	arahy.Tifrunner.gnm1.ann1.RX34PI.1	ERF-VI-L	aradu.V14167.gnm1.ann1.Aradu.PM527.1	0.00513042	0.0669901	0.0765847	258	62.4167	195.583	1	4	0.00511291	0.0640854		4.12501
	AhERF-28	arahy.Tifrunner.gnm1.ann1.J0DG7J.1	ERF-VI-L	aradu.V14167.gnm1.ann1.Aradu.83F0C.1	0	0.00427961	0	1020	234.333	785.667	0	1	0	0.00426743		0.263523
	AhERF-69	arahy.Tifrunner.gnm1.ann1.VG3SGX.1	ERF-X	aradu.V14167.gnm1.ann1.Aradu.83F0C.1	0.00639118	0.0216465	0.295252	1020	234.333	785.667	5	5	0.00636402	0.0213371		1.33291
	AhERF-11	arahy.Tifrunner.gnm1.ann1.5I2TXN.1	ERF-X	aradu.V14167.gnm1.ann1.Aradu.Y3BW3.1	0.0319791	0.0821964	0.389057	582	124.167	457.833	14.3333	9.66667	0.0313069	0.0778523		5.06135
	AhERF-49	arahy.Tifrunner.gnm1.ann1.ARVN7W.1	ERF-X	aradu.V14167.gnm1.ann1.Aradu.Y3BW3.1	0.0319791	0.0821964	0.389057	582	124.167	457.833	14.3333	9.66667	0.0313069	0.0778523		5.06135
	AhERF-22	arahy.Tifrunner.gnm1.ann1.E9BLTS.1	ERF-X	aradu.V14167.gnm1.ann1.Aradu.546FD.1	0.0047572	0.0151616	0.313766	555	133.25	421.75	2	2	0.00474215	0.0150094		0.933596
	AhERF-60	arahy.Tifrunner.gnm1.ann1.I2ZHTU.1	ERF-X	aradu.V14167.gnm1.ann1.Aradu.546FD.1	0.0143516	0.0709656	0.202234	555	132.917	422.083	6	9	0.0142152	0.0677116		4.3698
	AhERF-26	arahy.Tifrunner.gnm1.ann1.2Q12N5.1	ERF-X	aradu.V14167.gnm1.ann1.Aradu.JL25Y.1	0.00934883	0.0268185	0.348596	690	151.833	538.167	5	4	0.0092908	0.0263447		1.65139
	AhERF-66	arahy.Tifrunner.gnm1.ann1.B66PX0.1	ERF-X	aradu.V14167.gnm1.ann1.Aradu.JL25Y.1	0.0264761	0.0983865	0.269103	690	151.833	538.167	14	14	0.0260142	0.0922064		6.05828
	AhERF-54	arahy.Tifrunner.gnm1.ann1.0UF999.1	ERF-X	aradu.V14167.gnm1.ann1.Aradu.H9U8I.1	0.0121088	0.0439964	0.275221	1380	339.333	1040.67	12.5	14.5	0.0120115	0.0427308		2.70914
	AhERF-14	arahy.Tifrunner.gnm1.ann1.WDSQ8J.1	ERF-X	aradu.V14167.gnm1.ann1.Aradu.H9U8I.1	0.0056027	0.0261591	0.214178	1425	350.083	1074.92	6	9	0.00558183	0.0257082		1.61078
	AhERF-68	arahy.Tifrunner.gnm1.ann1.2Y0GDL.1	ERF-X	aradu.V14167.gnm1.ann1.Aradu.NK24P.1	0.0735707	0.174721	0.421074	1017	241.667	775.333	54.3333	37.6667	0.0700774	0.155862		10.7587
	AhERF-29	arahy.Tifrunner.gnm1.ann1.P2THRP.1	ERF-X	aradu.V14167.gnm1.ann1.Aradu.NK24P.1	0.00252738	0.0040872	0.618365	1038	245.333	792.667	2	1	0.00252313	0.00407609		0.251675
	AhERF-6	arahy.Tifrunner.gnm1.ann1.2AHI7R.1	ERF-X	aradu.V14167.gnm1.ann1.Aradu.K41I0.1	0.00143027	0.00874008	0.163645	930	230.167	699.833	1	2	0.00142891	0.00868936		0.538183
	AhERF-42	arahy.Tifrunner.gnm1.ann1.F2D5GR.1	ERF-X	aradu.V14167.gnm1.ann1.Aradu.K41I0.1	0.010198	0.0223647	0.455989	918	226.917	691.083	7	5	0.010129	0.0220345		1.37714
	AhERF-76	arahy.Tifrunner.gnm1.ann1.EZ5RGK.1	ERF-VII	aradu.V14167.gnm1.ann1.Aradu.ME4LN.1	0.0182956	0.0762023	0.240092	1023	248.417	774.583	14	18	0.0180742	0.0724589		4.69226
	AhERF-9	arahy.Tifrunner.gnm1.ann1.45NR7C.1	ERF-VII	aradu.V14167.gnm1.ann1.Aradu.ZGR3J.1	0.0182915	0.0155075	1.17952	630	141.167	488.833	8.83333	2.16667	0.0180702	0.0153483		0.954896
	AhERF-46	arahy.Tifrunner.gnm1.ann1.ER44IM.1	ERF-VII	aradu.V14167.gnm1.ann1.Aradu.ZGR3J.1	0.0288464	0.0679197	0.424713	630	141.167	488.833	13.8333	9.16667	0.0282987	0.0649351		4.18225
	AhERF-56	arahy.Tifrunner.gnm1.ann1.DRB5KP.1	ERF-VII	aradu.V14167.gnm1.ann1.Aradu.NZ8CP.1	0.0116141	0.0724076	0.160398	897	202.833	694.167	8	14	0.0115246	0.0690222		4.4586
	AhERF-20	arahy.Tifrunner.gnm1.ann1.GP7L65.1	ERF-VII	aradu.V14167.gnm1.ann1.Aradu.NZ8CP.1	0	0.0148888	0	897	203.5	693.5	0	3	0	0.014742		0.9168
	AhERF-58	arahy.Tifrunner.gnm1.ann1.MMX4MC.1	ERF-VII	aradu.V14167.gnm1.ann1.Aradu.00XL9.1	0.00116302	0.0158213	0.0735096	1116	255.5	860.5	1	4	0.00116212	0.0156556		0.974217
	AhERF-39	arahy.Tifrunner.gnm1.ann1.GGDF5U.1	ERF-VII	aradu.V14167.gnm1.ann1.Aradu.3UE4N.1	0.0077105	0.0490152	0.157308	1014	231.833	782.167	6	11	0.007671	0.0474479		3.01818
	AhERF-4	arahy.Tifrunner.gnm1.ann1.VF7WU9.1	ERF-IX	aradu.V14167.gnm1.ann1.Aradu.3UE4N.1	0.00127932	0.017468	0.0732376	1014	231.667	782.333	1	4	0.00127823	0.0172662		1.07562
	AhERF-50	arahy.Tifrunner.gnm1.ann1.FU6CIC.1	ERF-IX	aradu.V14167.gnm1.ann1.Aradu.470B5.1	0.00171282	0.00556073	0.30802	765	180.5	584.5	1	1	0.00171086	0.00554017		0.342409
	AhERF-12	arahy.Tifrunner.gnm1.ann1.JGE7BU.1	ERF-IX	aradu.V14167.gnm1.ann1.Aradu.470B5.1	0.00171282	0.00556073	0.30802	765	180.5	584.5	1	1	0.00171086	0.00554017		0.342409
	AhERF-51	arahy.Tifrunner.gnm1.ann1.4XS3FZ.1	ERF-IX	aradu.V14167.gnm1.ann1.Aradu.LD7BF.1	0.00159957	0.0194658	0.0821735	834	208.167	625.833	1	4	0.00159787	0.0192154		1.19863
	AhERF-13	arahy.Tifrunner.gnm1.ann1.ZW7540.1	ERF-IX	aradu.V14167.gnm1.ann1.Aradu.LD7BF.1	0.00159957	0.0194658	0.0821735	834	208.167	625.833	1	4	0.00159787	0.0192154		1.19863
	AhERF-71	arahy.Tifrunner.gnm1.ann1.EAK3RU.1	ERF-IX	aradu.V14167.gnm1.ann1.Aradu.VS60N.1	0.023396	0.0688408	0.339856	741	162.167	578.833	13.3333	10.6667	0.0230348	0.065776		4.23897
	AhERF-31	arahy.Tifrunner.gnm1.ann1.T22KDW.1	ERF-IX	aradu.V14167.gnm1.ann1.Aradu.VS60N.1	0.0265926	0.0310007	0.857807	996	230.5	765.5	20	7	0.0261267	0.0303688		1.90891
	AhERF-32	arahy.Tifrunner.gnm1.ann1.L5Q3AX.1	ERF-IX	aradu.V14167.gnm1.ann1.Aradu.B90GQ.1	0.00290839	0.0317508	0.0916006	441	96.5	344.5	1	3	0.00290276	0.0310881		1.9551
	Mean				0.0168001	0.0514703	0.272162	900	207.167	693.833	12.5833	9.25	0.0166131	0.0497439		3.16936

## Sheet: Table S7
Supplementary Table S7. The Ka/Ks ratios and estimated divergence time for orthologous AP2/ERF genes between A. hypogaea cv. Tifrunner and A. ipaeansis.
Gene name	PeanutBase Locus Identifier	Fanily-Group	PeanutBase Locus Identifier	Ka	Ks	Ka_Ks	EffectiveLen	AverageS-sites	AverageN-sites	cN	cS	pN	pS	Note	Mya
AhAP2-37	arahy.Tifrunner.gnm1.ann1.L4Q0K2.1	AP2	araip.K30076.gnm1.ann1.Araip.AI81V.1	0	0	NaN	1296	285.667	1010.33	0	0	0	0		0
AhAP2-51	arahy.Tifrunner.gnm1.ann1.ZL8GWI.1	AP2	araip.K30076.gnm1.ann1.Araip.MYZ56.1	0	0	NaN	1722	361.167	1360.83	0	0	0	0		0
AhAP2-31	arahy.Tifrunner.gnm1.ann1.ULX5CX.1	AP2	araip.K30076.gnm1.ann1.Araip.TQ7YN.1	0	0	NaN	768	169.333	598.667	0	0	0	0		0
AhAP2-59	arahy.Tifrunner.gnm1.ann1.5MV2CV.1	AP2	araip.K30076.gnm1.ann1.Araip.L05NW.1	0	0	NaN	978	215.667	762.333	0	0	0	0		0
AhSoloist-4	arahy.Tifrunner.gnm1.ann1.20QC9Q.1	Soloist	araip.K30076.gnm1.ann1.Araip.W493A.1	0	0	NaN	678	148.5	529.5	0	0	0	0		0
AhSoloist-5	arahy.Tifrunner.gnm1.ann1.ZH29RS.1	Soloist	araip.K30076.gnm1.ann1.Araip.DLE1Q.1	0.00284698	0		909	205.167	703.833	2	0	0.00284158	0		0
AhDREB-23	arahy.Tifrunner.gnm1.ann1.X9M6WH.1	DREB-III	araip.K30076.gnm1.ann1.Araip.RA8PB.1	0	0	NaN	234	63	171	0	0	0	0		0
AhDREB-38	arahy.Tifrunner.gnm1.ann1.GS7VU5.1	DREB-III	araip.K30076.gnm1.ann1.Araip.6Z4YF.1	0	0	NaN	756	186.167	569.833	0	0	0	0		0
AhDREB-41	arahy.Tifrunner.gnm1.ann1.YAEJ5M.1	DREB-III	araip.K30076.gnm1.ann1.Araip.P3BCC.1	0	0	NaN	786	184.667	601.333	0	0	0	0		0
AhDREB-37	arahy.Tifrunner.gnm1.ann1.9V08HM.1	DREB-III	araip.K30076.gnm1.ann1.Araip.7XH09.1	0	0	NaN	606	140.5	465.5	0	0	0	0		0
AhDREB-30	arahy.Tifrunner.gnm1.ann1.47NS3A.1	DREB-II	araip.K30076.gnm1.ann1.Araip.VXX40.1	0	0	NaN	237	55.1667	181.833	0	0	0	0		0
AhDREB-33	arahy.Tifrunner.gnm1.ann1.WP3ECB.1	DREB-I	araip.K30076.gnm1.ann1.Araip.187W4.1	0	0	NaN	843	187.167	655.833	0	0	0	0		0
AhDREB-27	arahy.Tifrunner.gnm1.ann1.KQL0FY.1	DREB-IV	araip.K30076.gnm1.ann1.Araip.U663M.1	0	0	NaN	1059	221.5	837.5	0	0	0	0		0
AhDREB-25	arahy.Tifrunner.gnm1.ann1.KD4831.1	DREB-IV	araip.K30076.gnm1.ann1.Araip.3JJ8N.1	0	0	NaN	1470	292.833	1177.17	0	0	0	0		0
AhDREB-39	arahy.Tifrunner.gnm1.ann1.L5HMHT.1	DREB-IV	araip.K30076.gnm1.ann1.Araip.9R7P2.1	0	0	NaN	507	120.333	386.667	0	0	0	0		0
AhDREB-35	arahy.Tifrunner.gnm1.ann1.5KI8FH.1	DREB-IV	araip.K30076.gnm1.ann1.Araip.6ZJ3N.1	0.00105467	0		1215	266.167	948.833	1	0	0.00105393	0		0
AhDREB-26	arahy.Tifrunner.gnm1.ann1.DIZB8V.1	DREB-V	araip.K30076.gnm1.ann1.Araip.XMM29.1	0	0	NaN	723	166.833	556.167	0	0	0	0		0
AhDREB-40	arahy.Tifrunner.gnm1.ann1.KDEH1Y.1	DREB-V	araip.K30076.gnm1.ann1.Araip.S5ATW.1	0	0	NaN	729	148.5	580.5	0	0	0	0		0
AhDREB-34	arahy.Tifrunner.gnm1.ann1.2YN4P9.1	DREB-V	araip.K30076.gnm1.ann1.Araip.KAK82.1	0	0	NaN	594	128.667	465.333	0	0	0	0		0
AhERF-37	arahy.Tifrunner.gnm1.ann1.Y7XFN8.1	ERF-VI	araip.K30076.gnm1.ann1.Araip.P8G5K.1	0	0	NaN	840	208.5	631.5	0	0	0	0		0
AhERF-57	arahy.Tifrunner.gnm1.ann1.J6K2KY.1	ERF-VI	araip.K30076.gnm1.ann1.Araip.62IDN.1	0	0	NaN	861	192.5	668.5	0	0	0	0		0
AhERF-61	arahy.Tifrunner.gnm1.ann1.804PS6.1	ERF-VIII	araip.K30076.gnm1.ann1.Araip.ANU1V.1	0	0	NaN	423	95	328	0	0	0	0		0
AhERF-70	arahy.Tifrunner.gnm1.ann1.ZQ3898.1	ERF-VIII	araip.K30076.gnm1.ann1.Araip.IN0FT.1	0	0	NaN	1053	238.667	814.333	0	0	0	0		0
AhERF-74	arahy.Tifrunner.gnm1.ann1.57AKVM.1	ERF-VIII	araip.K30076.gnm1.ann1.Araip.993UZ.1	0	0	NaN	585	156.167	428.833	0	0	0	0		0
AhERF-73	arahy.Tifrunner.gnm1.ann1.AS0C7C.1	ERF-VIII	araip.K30076.gnm1.ann1.Araip.AKR06.1	0	0	NaN	705	171.667	533.333	0	0	0	0		0
AhERF-62	arahy.Tifrunner.gnm1.ann1.8ZPK8F.1	ERF-VIII	araip.K30076.gnm1.ann1.Araip.B2ESJ.1	0	0	NaN	678	173	505	0	0	0	0		0
AhERF-63	arahy.Tifrunner.gnm1.ann1.RX34PI.1	ERF-VI-L	araip.K30076.gnm1.ann1.Araip.0YB7K.1	0	0	NaN	258	62.5	195.5	0	0	0	0		0
AhERF-69	arahy.Tifrunner.gnm1.ann1.VG3SGX.1	ERF-X	araip.K30076.gnm1.ann1.Araip.KY0TY.1	0	0	NaN	1020	234.333	785.667	0	0	0	0		0
AhERF-66	arahy.Tifrunner.gnm1.ann1.B66PX0.1	ERF-X	araip.K30076.gnm1.ann1.Araip.3W5AL.1	0	0	NaN	690	151.833	538.167	0	0	0	0		0
AhERF-68	arahy.Tifrunner.gnm1.ann1.2Y0GDL.1	ERF-X	araip.K30076.gnm1.ann1.Araip.KL8NJ.1	0	0	NaN	1131	269.667	861.333	0	0	0	0		0
AhERF-76	arahy.Tifrunner.gnm1.ann1.EZ5RGK.1	ERF-VII	araip.K30076.gnm1.ann1.Araip.88WSL.1	0.00143438	0		924	226.167	697.833	1	0	0.00143301	0		0
AhERF-55	arahy.Tifrunner.gnm1.ann1.GIJ59W.1	ERF-VII	araip.K30076.gnm1.ann1.Araip.BUP6F.1	0	0	NaN	369	86.1667	282.833	0	0	0	0		0
AhERF-46	arahy.Tifrunner.gnm1.ann1.ER44IM.1	ERF-VII	araip.K30076.gnm1.ann1.Araip.ZRX6N.1	0	0	NaN	813	181.333	631.667	0	0	0	0		0
AhERF-75	arahy.Tifrunner.gnm1.ann1.0PYI42.1	ERF-VII	araip.K30076.gnm1.ann1.Araip.HTN5Z.1	0	0	NaN	516	110.5	405.5	0	0	0	0		0
AhERF-56	arahy.Tifrunner.gnm1.ann1.DRB5KP.1	ERF-VII	araip.K30076.gnm1.ann1.Araip.LJJ47.1	0	0	NaN	921	207.333	713.667	0	0	0	0		0
AhERF-58	arahy.Tifrunner.gnm1.ann1.MMX4MC.1	ERF-VII	araip.K30076.gnm1.ann1.Araip.E2MIX.1	0	0	NaN	1122	258	864	0	0	0	0		0
AhERF-39	arahy.Tifrunner.gnm1.ann1.GGDF5U.1	ERF-VII	araip.K30076.gnm1.ann1.Araip.F3QBW.1	0	0	NaN	1173	267.5	905.5	0	0	0	0		0
AhERF-71	arahy.Tifrunner.gnm1.ann1.EAK3RU.1	ERF-IX	araip.K30076.gnm1.ann1.Araip.SN6G0.1	0	0	NaN	747	163.5	583.5	0	0	0	0		0
AhERF-64	arahy.Tifrunner.gnm1.ann1.WPAQ8S.1	ERF-VIII	araip.K30076.gnm1.ann1.Araip.A8VCA.1	NaN	NaN	NaN	696	163.667	526.333	NaN	NaN	NaN	NaN		#VALUE!
AhAP2-37	arahy.Tifrunner.gnm1.ann1.L4Q0K2.1	AP2	araip.K30076.gnm1.ann1.Araip.X39YD.1	0.272521	1.38382	0.196935	1134	250.333	883.667	201.917	158.083	0.228499	0.631491		85.2103
AhAP2-6	arahy.Tifrunner.gnm1.ann1.TN1J43.1	AP2	araip.K30076.gnm1.ann1.Araip.X39YD.1	0.300762	1.37954	0.218016	1155	258	897	222.25	162.75	0.24777	0.630814		84.9471
AhAP2-6	arahy.Tifrunner.gnm1.ann1.TN1J43.1	AP2	araip.K30076.gnm1.ann1.Araip.AI81V.1	0.0129982	0.0397444	0.327044	1293	284.167	1008.83	13	11	0.0128862	0.0387097		2.44732
AhAP2-10	arahy.Tifrunner.gnm1.ann1.6BK6B8.1	AP2	araip.K30076.gnm1.ann1.Araip.RB7C2.1	0.0560396	0.0909428	0.616207	1227	276.333	950.667	51.3333	23.6667	0.0539972	0.0856454		5.59993
AhAP2-10	arahy.Tifrunner.gnm1.ann1.6BK6B8.1	AP2	araip.K30076.gnm1.ann1.Araip.XB73L.1	0.655509	3.11653	0.210333	1095	260.417	834.583	364.75	192.25	0.437044	0.73824		191.904
AhAP2-35	arahy.Tifrunner.gnm1.ann1.XI0ITM.1	AP2	araip.K30076.gnm1.ann1.Araip.XB73L.1	0	0.00366525	0	1098	273.5	824.5	0	1	0	0.00365631		0.225693
AhAP2-40	arahy.Tifrunner.gnm1.ann1.HP6LSM.1	AP2	araip.K30076.gnm1.ann1.Araip.RB7C2.1	0.00236687	0.00403227	0.586981	1095	248.667	846.333	2	1	0.00236314	0.00402145		0.248292
AhAP2-23	arahy.Tifrunner.gnm1.ann1.ETC6KF.1	AP2	araip.K30076.gnm1.ann1.Araip.X39YD.1	0.0305448	0.0927973	0.329156	1302	296.917	1005.08	30.0833	25.9167	0.0299312	0.087286		5.71412
AhAP2-23	arahy.Tifrunner.gnm1.ann1.ETC6KF.1	AP2	araip.K30076.gnm1.ann1.Araip.AI81V.1	0.275887	1.52865	0.180477	1149	253.333	895.667	206.75	165.25	0.230834	0.652303		94.1286
AhAP2-42	arahy.Tifrunner.gnm1.ann1.N9BW0I.1	AP2	araip.K30076.gnm1.ann1.Araip.1VN1Z.1	0.0285082	0.0469029	0.607814	1302	318.917	983.083	27.5	14.5	0.0279732	0.0454664		2.88811
AhAP2-13	arahy.Tifrunner.gnm1.ann1.RWA9J9.1	AP2	araip.K30076.gnm1.ann1.Araip.1VN1Z.1	0.0285082	0.0469029	0.607814	1302	318.917	983.083	27.5	14.5	0.0279732	0.0454664		2.88811
AhAP2-38	arahy.Tifrunner.gnm1.ann1.WU5RMI.1	AP2	araip.K30076.gnm1.ann1.Araip.46YUC.1	0.169907	0.173701	0.978157	1080	265.5	814.5	123.833	41.1667	0.152036	0.155053		10.6959
AhAP2-8	arahy.Tifrunner.gnm1.ann1.RN6KV5.2	AP2	araip.K30076.gnm1.ann1.Araip.46YUC.1	0.186006	0.223651	0.831682	1077	264.583	812.417	133.833	51.1667	0.164735	0.193386		13.7716
AhAP2-58	arahy.Tifrunner.gnm1.ann1.GP73H9.1	AP2	araip.K30076.gnm1.ann1.Araip.AXK3N.1	0.00251327	0.00595241	0.422227	1533	337.333	1195.67	3	2	0.00250906	0.00592885		0.366528
AhAP2-27	arahy.Tifrunner.gnm1.ann1.V8I50K.1	AP2	araip.K30076.gnm1.ann1.Araip.AXK3N.1	0.00758114	0.0618588	0.122555	1530	336.833	1193.17	9	20	0.00754295	0.0593765		3.80904
AhAP2-52	arahy.Tifrunner.gnm1.ann1.J9H0YQ.1	AP2	araip.K30076.gnm1.ann1.Araip.E0UEG.1	0.00167306	0.00292755	0.571488	1539	342.25	1196.75	2	1	0.00167119	0.00292184		0.180268
AhAP2-21	arahy.Tifrunner.gnm1.ann1.9T6609.1	AP2	araip.K30076.gnm1.ann1.Araip.MYZ56.1	0.00972097	0.0284664	0.341489	1704	358	1346	13	10	0.00965825	0.027933		1.75286
AhAP2-22	arahy.Tifrunner.gnm1.ann1.7SA24Y.1	AP2	araip.K30076.gnm1.ann1.Araip.E0UEG.1	0.0123324	0.0214246	0.575618	1476	331.417	1144.58	14	7	0.0122315	0.0211214		1.31925
AhAP2-2	arahy.Tifrunner.gnm1.ann1.M71NXQ.1	AP2	araip.K30076.gnm1.ann1.Araip.TQ7YN.1	0.0122702	0.0377834	0.324751	738	162.833	575.167	7	6	0.0121704	0.0368475		2.32657
AhAP2-43	arahy.Tifrunner.gnm1.ann1.6V99EA.1	AP2	araip.K30076.gnm1.ann1.Araip.60YE7.1	0	0.00326265	0	1380	307.167	1072.83	0	1	0	0.00325556		0.200902
AhAP2-28	arahy.Tifrunner.gnm1.ann1.F0M2KT.1	AP2	araip.K30076.gnm1.ann1.Araip.L05NW.1	0.00262985	0.0331023	0.0794462	978	216.167	761.833	2	7	0.00262525	0.0323824		2.03832
AhAP2-12	arahy.Tifrunner.gnm1.ann1.F5Q2PM.1	AP2	araip.K30076.gnm1.ann1.Araip.L05NW.1	0.223129	1.15472	0.193232	936	202.833	733.167	141.5	119.5	0.192998	0.589154		71.1033
AhAP2-12	arahy.Tifrunner.gnm1.ann1.F5Q2PM.1	AP2	araip.K30076.gnm1.ann1.Araip.34E5E.1	0.00617446	0.0277552	0.222461	834	183.5	650.5	4	5	0.00614912	0.027248		1.70907
AhAP2-41	arahy.Tifrunner.gnm1.ann1.I3YYWX.1	AP2	araip.K30076.gnm1.ann1.Araip.34E5E.1	0	0.00531917	0	852	188.667	663.333	0	1	0	0.00530035		0.327535
AhAP2-25	arahy.Tifrunner.gnm1.ann1.UVRI66.2	AP2	araip.K30076.gnm1.ann1.Araip.W7WHZ.1	0.134083	0.250116	0.536083	711	152.417	558.583	68.5833	32.4167	0.122781	0.212685		15.4012
AhAP2-47	arahy.Tifrunner.gnm1.ann1.UU942A.1	AP2	araip.K30076.gnm1.ann1.Araip.SZ63C.1	0	0.00437957	0	1056	229	827	0	1	0	0.00436681		0.269678
AhAP2-49	arahy.Tifrunner.gnm1.ann1.6MJ8Q6.1	AP2	araip.K30076.gnm1.ann1.Araip.6J28H.1	0.023472	0.0339344	0.691689	1260	286.333	973.667	22.5	9.5	0.0231085	0.0331781		2.08955
AhAP2-17	arahy.Tifrunner.gnm1.ann1.AE6IJA.1	AP2	araip.K30076.gnm1.ann1.Araip.6J28H.1	0.0234741	0.0561687	0.41792	1260	286.417	973.583	22.5	15.5	0.0231105	0.054117		3.45866
AhAP2-26	arahy.Tifrunner.gnm1.ann1.Y9PZ1H.1	AP2	araip.K30076.gnm1.ann1.Araip.S3MIZ.1	0.0599444	0.148303	0.404203	771	176.5	594.5	34.25	23.75	0.0576114	0.134561		9.13195
AhAP2-33	arahy.Tifrunner.gnm1.ann1.HG2532.2	AP2	araip.K30076.gnm1.ann1.Araip.80H4B.1	0.13018	0.196426	0.662745	633	137.917	495.083	59.1667	23.8333	0.119509	0.17281		12.0952
AhAP2-4	arahy.Tifrunner.gnm1.ann1.KP68JR.1	AP2	araip.K30076.gnm1.ann1.Araip.80H4B.1	0.106725	0.215407	0.495456	633	137.083	495.917	49.3333	25.6667	0.0994791	0.187234		13.264
AhAP2-29	arahy.Tifrunner.gnm1.ann1.H1PWIN.1	AP2	araip.K30076.gnm1.ann1.Araip.MAL00.1	0.157464	0.880327	0.17887	798	177.25	620.75	88.1667	91.8333	0.142032	0.518101		54.2073
AhAP2-29	arahy.Tifrunner.gnm1.ann1.H1PWIN.1	AP2	araip.K30076.gnm1.ann1.Araip.M3RAJ.1	0.0732623	0.0450017	1.62799	984	217.5	766.5	53.5	9.5	0.0697978	0.0436782		2.77104
AhAP2-5	arahy.Tifrunner.gnm1.ann1.K6QUG2.1	AP2	araip.K30076.gnm1.ann1.Araip.L8K4F.1	0.0216871	0.0196782	1.10209	1434	334.667	1099.33	23.5	6.5	0.0213766	0.0194223		1.21171
AhAP2-36	arahy.Tifrunner.gnm1.ann1.QEK7F9.1	AP2	araip.K30076.gnm1.ann1.Araip.L8K4F.1	0.0179567	0.0105212	1.70671	1434	335	1099	19.5	3.5	0.0177434	0.0104478		0.647858
AhAP2-50	arahy.Tifrunner.gnm1.ann1.38RLY4.1	AP2	araip.K30076.gnm1.ann1.Araip.B5WG1.1	0.0606667	0.0611682	0.991801	531	117.75	413.25	24.0833	6.91667	0.0582779	0.0587403		3.76651
AhAP2-45	arahy.Tifrunner.gnm1.ann1.4G06NJ.2	AP2	araip.K30076.gnm1.ann1.Araip.MAL00.1	0.00197304	0.00328588	0.60046	1320	305	1015	2	1	0.00197044	0.00327869		0.202332
AhAP2-55	arahy.Tifrunner.gnm1.ann1.N9UN2I.1	AP2	araip.K30076.gnm1.ann1.Araip.E29R3.1	0.155741	0.220438	0.706504	558	129.583	428.417	60.25	24.75	0.140634	0.190997		13.5738
AhAP2-15	arahy.Tifrunner.gnm1.ann1.00XS3D.1	AP2	araip.K30076.gnm1.ann1.Araip.MAL00.1	0.0188604	0.0526768	0.35804	1377	321.083	1055.92	19.6667	16.3333	0.0186252	0.0508695		3.24364
AhAP2-19	arahy.Tifrunner.gnm1.ann1.MRL478.1	AP2	araip.K30076.gnm1.ann1.Araip.B5WG1.1	0.0740583	0.0607204	1.21966	531	118.583	412.417	29.0833	6.91667	0.0705193	0.0583275		3.73894
AhAP2-24	arahy.Tifrunner.gnm1.ann1.KDI7TH.1	AP2	araip.K30076.gnm1.ann1.Araip.ICE1V.1	0.00788444	0.0379828	0.207579	336	81	255	2	3	0.00784314	0.037037		2.33884
AhAP2-24	arahy.Tifrunner.gnm1.ann1.KDI7TH.1	AP2	araip.K30076.gnm1.ann1.Araip.L8K4F.1	0.230486	0.730702	0.315431	1323	310.917	1012.08	200.833	145.167	0.198436	0.466899		44.994
AhAP2-54	arahy.Tifrunner.gnm1.ann1.YSN9W3.2	AP2	araip.K30076.gnm1.ann1.Araip.ICE1V.1	0.00393186	0.0251069	0.156604	336	81	255	1	2	0.00392157	0.0246914		1.54599
AhAP2-54	arahy.Tifrunner.gnm1.ann1.YSN9W3.2	AP2	araip.K30076.gnm1.ann1.Araip.L8K4F.1	0.167451	0.618039	0.27094	1380	324.417	1055.58	158.417	136.583	0.150075	0.421012		38.0566
AhSoloist-1	arahy.Tifrunner.gnm1.ann1.RCQ4HC.1	Soloist	araip.K30076.gnm1.ann1.Araip.W493A.1	0.00775451	0.0346883	0.223549	666	147.5	518.5	4	5	0.00771456	0.0338983		2.13598
AhSoloist-2	arahy.Tifrunner.gnm1.ann1.L32FWB.1	Soloist	araip.K30076.gnm1.ann1.Araip.W493A.1	1.14625	2.88329	0.39755	657	144.083	512.917	301.25	105.75	0.587327	0.73395		177.542
AhDREB-9	arahy.Tifrunner.gnm1.ann1.PSKQ19.1	DREB-III	araip.K30076.gnm1.ann1.Araip.RA8PB.1	0.133041	1.05273	0.126378	195	50.0833	144.917	17.6667	28.3333	0.121909	0.565724		64.8232
AhDREB-19	arahy.Tifrunner.gnm1.ann1.X2S259.1	DREB-III	araip.K30076.gnm1.ann1.Araip.P3BCC.1	0.0102173	0.0518192	0.197172	771	179.75	591.25	6	9	0.010148	0.0500695		3.19084
AhDREB-29	arahy.Tifrunner.gnm1.ann1.452FBF.1	DREB-III	araip.K30076.gnm1.ann1.Araip.Z2VYZ.1	0.0178462	0.050228	0.355304	675	164.667	510.333	9	8	0.0176355	0.048583		3.09286
AhDREB-5	arahy.Tifrunner.gnm1.ann1.FAI7YU.1	DREB-III	araip.K30076.gnm1.ann1.Araip.Z2VYZ.1	0.0178462	0.050228	0.355304	675	164.667	510.333	9	8	0.0176355	0.048583		3.09286
AhDREB-6	arahy.Tifrunner.gnm1.ann1.VJ8B3Q.1	DREB-II	araip.K30076.gnm1.ann1.Araip.VXX40.1	0	0.0568095	0	234	54.8333	179.167	0	3	0	0.0547112		3.49812
AhDREB-10	arahy.Tifrunner.gnm1.ann1.B20XFZ.1	DREB-I	araip.K30076.gnm1.ann1.Araip.LE5CL.1	0.0143323	0.0550112	0.260535	759	160.25	598.75	8.5	8.5	0.0141962	0.0530421		3.38739
AhDREB-13	arahy.Tifrunner.gnm1.ann1.XJX19T.1	DREB-I	araip.K30076.gnm1.ann1.Araip.K8KF4.1	0.0172368	0.0379161	0.454604	1065	243.417	821.583	14	9	0.0170403	0.0369736		2.33474
AhDREB-11	arahy.Tifrunner.gnm1.ann1.JRIM60.1	DREB-IV	araip.K30076.gnm1.ann1.Araip.KAK82.1	0.0228859	0.0609266	0.375631	594	128.167	465.833	10.5	7.5	0.0225403	0.0585176		3.75164
AhDREB-4	arahy.Tifrunner.gnm1.ann1.U8GE9Q.1	DREB-IV	araip.K30076.gnm1.ann1.Araip.LL89K.1	0.0977526	0.206241	0.473973	912	196.417	715.583	65.5833	35.4167	0.0916502	0.180314		12.6996
AhDREB-25	arahy.Tifrunner.gnm1.ann1.KD4831.1	DREB-IV	araip.K30076.gnm1.ann1.Araip.LL89K.1	0.384715	0.966258	0.398149	981	205.417	775.583	233.417	111.583	0.300956	0.543205		59.4987
AhDREB-3	arahy.Tifrunner.gnm1.ann1.SE8WTS.1	DREB-IV	araip.K30076.gnm1.ann1.Araip.LL89K.1	0.376596	1.04023	0.362031	978	204.25	773.75	229.083	114.917	0.296069	0.562627		64.0536
AhDREB-3	arahy.Tifrunner.gnm1.ann1.SE8WTS.1	DREB-IV	araip.K30076.gnm1.ann1.Araip.3JJ8N.1	0.0128666	0.0279916	0.459661	1467	291.167	1175.83	15	8	0.0127569	0.0274757		1.72362
AhDREB-12	arahy.Tifrunner.gnm1.ann1.73DHZN.1	DREB-IV	araip.K30076.gnm1.ann1.Araip.6ZJ3N.1	0.00740943	0.030744	0.241004	1215	265.583	949.417	7	8	0.00737295	0.0301224		1.8931
AhDREB-15	arahy.Tifrunner.gnm1.ann1.15RNTX.1	DREB-IV	araip.K30076.gnm1.ann1.Araip.LE5CL.1	0.46419	1.67753	0.276711	690	155	535	185.167	103.833	0.346106	0.669892		103.296
AhDREB-32	arahy.Tifrunner.gnm1.ann1.301SU2.1	DREB-IV	araip.K30076.gnm1.ann1.Araip.LE5CL.1	0.00660797	0.00627619	1.05286	768	160	608	4	1	0.00657895	0.00625		0.386465
AhDREB-14	arahy.Tifrunner.gnm1.ann1.8V3MXA.1	DREB-V	araip.K30076.gnm1.ann1.Araip.Y9RA8.1	0.00234101	0.0571705	0.0409478	555	127.167	427.833	1	7	0.00233736	0.0550459		3.52035
AhDREB-36	arahy.Tifrunner.gnm1.ann1.P2AB97.1	DREB-V	araip.K30076.gnm1.ann1.Araip.Y9RA8.1	0.00234101	0.0571705	0.0409478	555	127.167	427.833	1	7	0.00233736	0.0550459		3.52035
AhDREB-16	arahy.Tifrunner.gnm1.ann1.3D7MPL.1	DREB-V	araip.K30076.gnm1.ann1.Araip.S5ATW.1	0.00967046	0.105309	0.0918297	720	147.583	572.417	5.5	14.5	0.00960839	0.0982496		6.48452
AhDREB-18	arahy.Tifrunner.gnm1.ann1.VHG0QP.1	DREB-V	araip.K30076.gnm1.ann1.Araip.H2LYF.1	0.00350161	0.0385937	0.0907301	366	79.75	286.25	1	3	0.00349345	0.0376176		2.37646
AhERF-1	arahy.Tifrunner.gnm1.ann1.G0YQ1S.1	ERF-VI	araip.K30076.gnm1.ann1.Araip.P8G5K.1	0.00795763	0.0343759	0.231489	840	208.333	631.667	5	7	0.00791557	0.0336		2.11674
AhERF-17	arahy.Tifrunner.gnm1.ann1.3WAX0M.1	ERF-VI	araip.K30076.gnm1.ann1.Araip.62IDN.1	0.0243275	0.0998241	0.243704	861	192.583	668.417	16	18	0.0239372	0.093466		6.1468
AhERF-2	arahy.Tifrunner.gnm1.ann1.PSW8JM.1	ERF-VIII	araip.K30076.gnm1.ann1.Araip.P3T9T.1	0.0292937	0.0535411	0.547125	1497	348.333	1148.67	33	18	0.028729	0.0516746		3.29686
AhERF-38	arahy.Tifrunner.gnm1.ann1.PE2T0M.1	ERF-VIII	araip.K30076.gnm1.ann1.Araip.P3T9T.1	0.0710892	0.061598	1.15408	1731	391.75	1339.25	90.8333	23.1667	0.067824	0.0591364		3.79298
AhERF-30	arahy.Tifrunner.gnm1.ann1.C5BSUS.1	ERF-VIII	araip.K30076.gnm1.ann1.Araip.IN0FT.1	0.00998351	0.0257168	0.38821	1044	237.333	806.667	8	6	0.00991735	0.0252809		1.58355
AhERF-34	arahy.Tifrunner.gnm1.ann1.ILN3K9.1	ERF-VIII	araip.K30076.gnm1.ann1.Araip.993UZ.1	0.0197822	0.0650389	0.30416	582	155.167	426.833	8.33333	9.66667	0.0195236	0.0622986		4.00486
AhERF-43	arahy.Tifrunner.gnm1.ann1.4AG551.1	ERF-VIII	araip.K30076.gnm1.ann1.Araip.993UZ.1	0.251596	1.33211	0.18887	495	132.417	362.583	77.5	82.5	0.213744	0.623033		82.0266
AhERF-33	arahy.Tifrunner.gnm1.ann1.QGFJ76.1	ERF-VIII	araip.K30076.gnm1.ann1.Araip.AKR06.1	0.00375941	0.0481127	0.0781375	705	171.667	533.333	2	8	0.00375	0.0466019		2.9626
AhERF-23	arahy.Tifrunner.gnm1.ann1.JEZR1W.1	ERF-VIII	araip.K30076.gnm1.ann1.Araip.B2ESJ.1	0.00198413	0.0354397	0.0559861	678	173.333	504.667	1	6	0.00198151	0.0346154		2.18225
AhERF-24	arahy.Tifrunner.gnm1.ann1.DY3CW6.1	ERF-VIII	araip.K30076.gnm1.ann1.Araip.0YB7K.1	0.00513042	0.0669901	0.0765847	258	62.4167	195.583	1	4	0.00511291	0.0640854		4.12501
AhERF-28	arahy.Tifrunner.gnm1.ann1.J0DG7J.1	ERF-VI-L	araip.K30076.gnm1.ann1.Araip.KY0TY.1	0.00639118	0.0172669	0.370139	1020	234.333	785.667	5	4	0.00636402	0.0170697		1.06324
AhERF-11	arahy.Tifrunner.gnm1.ann1.5I2TXN.1	ERF-X	araip.K30076.gnm1.ann1.Araip.ZCG46.1	0.0183048	0.00538844	3.39704	585	124.167	460.833	8.33333	0.666667	0.0180832	0.00536913		0.3318
AhERF-49	arahy.Tifrunner.gnm1.ann1.ARVN7W.1	ERF-X	araip.K30076.gnm1.ann1.Araip.ZCG46.1	0.0183048	0.00538844	3.39704	585	124.167	460.833	8.33333	0.666667	0.0180832	0.00536913		0.3318
AhERF-26	arahy.Tifrunner.gnm1.ann1.2Q12N5.1	ERF-X	araip.K30076.gnm1.ann1.Araip.3W5AL.1	0.0322732	0.105934	0.304655	690	151.833	538.167	17	15	0.0315887	0.0987925		6.52301
AhERF-66	arahy.Tifrunner.gnm1.ann1.B66PX0.1	ERF-X	araip.K30076.gnm1.ann1.Araip.RQ5W2.1	0.332826	1.05001	0.316973	468	112.083	355.917	95.6667	63.3333	0.26879	0.565056		64.656
AhERF-29	arahy.Tifrunner.gnm1.ann1.P2THRP.1	ERF-X	araip.K30076.gnm1.ann1.Araip.KL8NJ.1	0.0758205	0.161624	0.469115	1083	257.917	825.083	59.5	37.5	0.0721139	0.145396		9.95224
AhERF-6	arahy.Tifrunner.gnm1.ann1.2AHI7R.1	ERF-X	araip.K30076.gnm1.ann1.Araip.8B6ML.1	0.00994627	0.0254585	0.390685	807	199.75	607.25	6	5	0.00988061	0.0250313		1.56764
AhERF-42	arahy.Tifrunner.gnm1.ann1.F2D5GR.1	ERF-X	araip.K30076.gnm1.ann1.Araip.88WSL.1	0.408905	0.974325	0.41968	798	201.833	596.167	187.917	110.083	0.315208	0.545417		59.9954
AhERF-42	arahy.Tifrunner.gnm1.ann1.F2D5GR.1	ERF-X	araip.K30076.gnm1.ann1.Araip.8B6ML.1	0	0.00497927	0	813	201.5	611.5	0	1	0	0.00496278		0.306605
AhERF-36	arahy.Tifrunner.gnm1.ann1.768P1R.2	ERF-X	araip.K30076.gnm1.ann1.Araip.88WSL.1	0.0130077	0.0841676	0.154545	924	226.083	697.917	9	18	0.0128955	0.0796167		5.18274
AhERF-36	arahy.Tifrunner.gnm1.ann1.768P1R.2	ERF-X	araip.K30076.gnm1.ann1.Araip.8B6ML.1	0.517257	1.07923	0.479283	756	188.917	567.083	211.917	108.083	0.373696	0.572122		66.4551
AhERF-76	arahy.Tifrunner.gnm1.ann1.EZ5RGK.1	ERF-VII	araip.K30076.gnm1.ann1.Araip.8B6ML.1	0.491192	0.927939	0.529336	756	189.25	566.75	204.25	100.75	0.360388	0.532365		57.1391
AhERF-20	arahy.Tifrunner.gnm1.ann1.GP7L65.1	ERF-VII	araip.K30076.gnm1.ann1.Araip.LJJ47.1	0.0115	0.066257	0.173566	906	205	701	8	13	0.0114123	0.0634146		4.07986
AhERF-15	arahy.Tifrunner.gnm1.ann1.ZJ433C.1	ERF-VII	araip.K30076.gnm1.ann1.Araip.E2MIX.1	0.00116302	0.0158213	0.0735096	1116	255.5	860.5	1	4	0.00116212	0.0156556		0.974217
AhERF-4	arahy.Tifrunner.gnm1.ann1.VF7WU9.1	ERF-IX	araip.K30076.gnm1.ann1.Araip.F3QBW.1	0.0077685	0.0502928	0.154465	1173	267.25	905.75	7	13	0.0077284	0.0486436		3.09685
AhERF-50	arahy.Tifrunner.gnm1.ann1.FU6CIC.1	ERF-IX	araip.K30076.gnm1.ann1.Araip.N6IZA.1	0.00688473	0.0338403	0.203448	765	181.333	583.667	4	6	0.00685323	0.0330882		2.08376
AhERF-12	arahy.Tifrunner.gnm1.ann1.JGE7BU.1	ERF-IX	araip.K30076.gnm1.ann1.Araip.N6IZA.1	0.00688473	0.0338403	0.203448	765	181.333	583.667	4	6	0.00685323	0.0330882		2.08376
AhERF-47	arahy.Tifrunner.gnm1.ann1.BDR3J7.1	ERF-IX	araip.K30076.gnm1.ann1.Araip.QQN2T.1	0.161061	0.388028	0.415074	579	133.417	445.583	64.5833	40.4167	0.144941	0.302936		23.8934
AhERF-31	arahy.Tifrunner.gnm1.ann1.T22KDW.1	ERF-IX	araip.K30076.gnm1.ann1.Araip.SN6G0.1	0.0289934	0.0872889	0.332154	744	163.833	580.167	16.5	13.5	0.0284401	0.0824008		5.37493
Mean				0.0183048	0.0555899	0.330655	856.5	201.667	665.875	14	9.58333	0.0180832	0.0535795		3.42303

## Sheet: Table S8
Supplementary Table S8. The Ka/Ks ratios and estimated divergence time for orthologous AP2/ERF genes between A. hypogaea cv. Tifrunner and Medicago truncatula L.
Gene name	PeanutBase Locus Identifier	Fanily-Group	Locus Identifier	Ka	Ks	Ka_Ks	EffectiveLen	AverageS-sites	AverageN-sites	cN	cS	pN	pS	Note	Mya
AhAP2-37	arahy.Tifrunner.gnm1.ann1.L4Q0K2.1	AP2	transcript:AES67699	0.280574	1.07322	0.261431	1338	290.583	1047.42	245.167	165.833	0.234068	0.570691		66.0851
AhAP2-37	arahy.Tifrunner.gnm1.ann1.L4Q0K2.1	AP2	transcript:AES88955	0.243528	1.02148	0.238408	1356	294.417	1061.58	220.75	164.25	0.207944	0.557883		62.8988
AhAP2-6	arahy.Tifrunner.gnm1.ann1.TN1J43.1	AP2		0.300696	1.12423	0.267469	1356	293	1063	263.333	170.667	0.247727	0.58248		69.2259
AhAP2-6	arahy.Tifrunner.gnm1.ann1.TN1J43.1	AP2	transcript:AES88955	0.262152	1.06929	0.245165	1371	297.5	1073.5	237.5	169.5	0.221239	0.569748		65.8428
AhAP2-10	arahy.Tifrunner.gnm1.ann1.6BK6B8.1	AP2	transcript:AES80430	0.308733	0.957524	0.322428	1896	428.083	1467.92	371.5	231.5	0.25308	0.540783		58.9609
AhAP2-10	arahy.Tifrunner.gnm1.ann1.6BK6B8.1	AP2	transcript:AES92298	0.602353	NaN	NaN	1446	332.833	1113.17	460.917	262.083	0.414059	0.787431	High Sequence Divergence Value (pS>=0.75)
AhAP2-35	arahy.Tifrunner.gnm1.ann1.XI0ITM.1	AP2	transcript:AES92298	0.218041	0.971631	0.224408	1314	313.333	1000.67	189.333	170.667	0.189207	0.544681		59.8295
AhAP2-40	arahy.Tifrunner.gnm1.ann1.HP6LSM.1	AP2	transcript:AES80430	0.30527	0.959471	0.318165	1758	396.25	1361.75	341.5	214.5	0.25078	0.541325		59.0807
AhAP2-23	arahy.Tifrunner.gnm1.ann1.ETC6KF.1	AP2	transcript:AES67699	0.294802	1.02196	0.288467	1173	264.333	908.667	221.5	147.5	0.243764	0.558008		62.9288
AhAP2-23	arahy.Tifrunner.gnm1.ann1.ETC6KF.1	AP2	transcript:AES88955	0.306234	1.26432	0.242212	1185	261.583	923.417	232.167	159.833	0.251421	0.611023		77.8523
AhAP2-42	arahy.Tifrunner.gnm1.ann1.N9BW0I.1	AP2	transcript:AES95988	0.158215	1.71169	0.0924323	1443	339.417	1103.58	157.417	228.583	0.142641	0.673459		105.4
AhAP2-42	arahy.Tifrunner.gnm1.ann1.N9BW0I.1	AP2	transcript:KEH20115	0.279667	1.10399	0.253323	1182	276	906	211.5	159.5	0.233444	0.577899		67.9798
AhAP2-13	arahy.Tifrunner.gnm1.ann1.RWA9J9.1	AP2	transcript:AES95988	0.158215	1.71169	0.0924323	1443	339.417	1103.58	157.417	228.583	0.142641	0.673459		105.4
AhAP2-13	arahy.Tifrunner.gnm1.ann1.RWA9J9.1	AP2	transcript:KEH20115	0.279667	1.10399	0.253323	1182	276	906	211.5	159.5	0.233444	0.577899		67.9798
AhAP2-38	arahy.Tifrunner.gnm1.ann1.WU5RMI.1	AP2	transcript:KEH20115	0.50792	1.82161	0.278831	978	235.417	742.583	274	161	0.368982	0.683894		112.168
AhAP2-8	arahy.Tifrunner.gnm1.ann1.RN6KV5.2	AP2	transcript:KEH20115	0.469314	1.76219	0.266324	969	233.5	735.5	256.583	158.417	0.348856	0.678444		108.51
AhAP2-52	arahy.Tifrunner.gnm1.ann1.J9H0YQ.1	AP2	transcript:KEH39993	0.282746	1.07159	0.263857	1647	358.583	1288.42	303.5	204.5	0.23556	0.5703		65.9844
AhAP2-52	arahy.Tifrunner.gnm1.ann1.J9H0YQ.1	AP2	transcript:KEH35850	0.272209	1.23105	0.221119	1662	370.833	1291.17	294.75	224.25	0.228282	0.604719		75.8038
AhAP2-21	arahy.Tifrunner.gnm1.ann1.9T6609.1	AP2	transcript:KEH39993	0.342904	0.790117	0.433991	1857	393.583	1463.42	402.75	192.25	0.275212	0.488461		48.6525
AhAP2-21	arahy.Tifrunner.gnm1.ann1.9T6609.1	AP2	transcript:KEH35850	0.348869	1.02383	0.340749	1827	398.25	1428.75	398.583	222.417	0.278973	0.558485		63.0437
AhAP2-51	arahy.Tifrunner.gnm1.ann1.ZL8GWI.1	AP2	transcript:KEH39993	0.324404	0.799239	0.405891	1839	392.917	1446.08	380.833	193.167	0.263355	0.491622		49.2142
AhAP2-22	arahy.Tifrunner.gnm1.ann1.7SA24Y.1	AP2	transcript:KEH39993	0.281891	1.0318	0.273203	1563	340.167	1222.83	287.333	190.667	0.234973	0.56051		63.5345
AhAP2-22	arahy.Tifrunner.gnm1.ann1.7SA24Y.1	AP2	transcript:KEH35850	0.274235	1.18177	0.232054	1560	349.667	1210.33	278	208	0.229689	0.594852		72.7692
AhAP2-2	arahy.Tifrunner.gnm1.ann1.M71NXQ.1	AP2	transcript:AES90761	0.249849	1.07006	0.233491	1599	350.333	1248.67	265.333	199.667	0.212493	0.569933		65.8904
AhAP2-2	arahy.Tifrunner.gnm1.ann1.M71NXQ.1	AP2	transcript:AES94498	0.372912	1.31872	0.282785	1434	310.917	1123.08	330	193	0.293834	0.620745		81.2017
AhAP2-31	arahy.Tifrunner.gnm1.ann1.ULX5CX.1	AP2	transcript:AES90761	0.24461	1.07631	0.227267	1608	351.167	1256.83	262.333	200.667	0.208726	0.571429		66.2755
AhAP2-43	arahy.Tifrunner.gnm1.ann1.6V99EA.1	AP2	transcript:AES90761	0.265073	0.954502	0.277708	1479	321.333	1157.67	258.5	173.5	0.223294	0.539938		58.7748
AhAP2-43	arahy.Tifrunner.gnm1.ann1.6V99EA.1	AP2	transcript:AES94498	0.393469	0.955467	0.411808	1410	304.667	1105.33	338.417	164.583	0.306167	0.540208		58.8342
AhAP2-59	arahy.Tifrunner.gnm1.ann1.5MV2CV.1	AP2	transcript:KEH24983	0.165076	0.665284	0.248129	984	215.75	768.25	113.833	95.1667	0.148172	0.441097		40.9658
AhAP2-28	arahy.Tifrunner.gnm1.ann1.F0M2KT.1	AP2	transcript:KEH24983	0.168179	0.642572	0.261728	984	216.25	767.75	115.667	93.3333	0.150657	0.431599		39.5672
AhAP2-12	arahy.Tifrunner.gnm1.ann1.F5Q2PM.1	AP2	transcript:AES77335	0.238152	0.766718	0.310611	987	212.25	774.75	158.083	101.917	0.204044	0.480173		47.2117
AhAP2-41	arahy.Tifrunner.gnm1.ann1.I3YYWX.1	AP2	transcript:AES77335	0.22901	0.755479	0.303132	1002	216.167	785.833	155.083	102.917	0.197349	0.476099		46.5196
AhAP2-49	arahy.Tifrunner.gnm1.ann1.6MJ8Q6.1	AP2	transcript:AES81356	0.0784836	0.742431	0.105712	1227	278.667	948.333	70.6667	131.333	0.0745167	0.471292		45.7162
AhAP2-17	arahy.Tifrunner.gnm1.ann1.AE6IJA.1	AP2	transcript:AES81356	0.0784908	0.771572	0.101728	1227	278.75	948.25	70.6667	134.333	0.0745232	0.481913		47.5106
AhAP2-26	arahy.Tifrunner.gnm1.ann1.Y9PZ1H.1	AP2	transcript:KEH28582	0.197861	0.854899	0.231444	843	185.583	657.417	114.333	94.6667	0.173913	0.510103		52.6415
AhAP2-33	arahy.Tifrunner.gnm1.ann1.HG2532.2	AP2	transcript:AES92458	0.196223	1.02714	0.191038	993	213.5	779.5	134.583	119.417	0.172653	0.559329		63.2476
AhAP2-4	arahy.Tifrunner.gnm1.ann1.KP68JR.1	AP2	transcript:AES92458	0.206996	0.974198	0.212478	975	210.25	764.75	138.333	114.667	0.180887	0.545382		59.9876
AhAP2-29	arahy.Tifrunner.gnm1.ann1.H1PWIN.1	AP2	transcript:KEH27523	0.11837	0.784325	0.15092	960	211.917	748.083	81.9167	103.083	0.109502	0.486433		48.2959
AhAP2-5	arahy.Tifrunner.gnm1.ann1.K6QUG2.1	AP2	transcript:AES67388	0.170037	0.778097	0.218529	1365	317.167	1047.83	159.417	153.583	0.152139	0.484235		47.9124
AhAP2-5	arahy.Tifrunner.gnm1.ann1.K6QUG2.1	AP2	transcript:KEH30075	0.18061	0.614405	0.293959	1374	318.5	1055.5	169.417	133.583	0.160508	0.419414		37.8328
AhAP2-36	arahy.Tifrunner.gnm1.ann1.QEK7F9.1	AP2	transcript:AES67388	0.170635	0.773661	0.220556	1365	317.167	1047.83	159.917	153.083	0.152617	0.482659		47.6392
AhAP2-36	arahy.Tifrunner.gnm1.ann1.QEK7F9.1	AP2	transcript:KEH30075	0.180976	0.618759	0.292482	1374	318.833	1055.17	169.667	134.333	0.160796	0.421328		38.1009
AhAP2-45	arahy.Tifrunner.gnm1.ann1.4G06NJ.2	AP2	transcript:KEH31463	0.263382	1.06162	0.248096	1425	316.667	1108.33	246.167	179.833	0.222105	0.567895		65.3705
AhAP2-45	arahy.Tifrunner.gnm1.ann1.4G06NJ.2	AP2	transcript:KEH27523	0.186677	1.24646	0.149765	1383	308.417	1074.58	177.583	187.417	0.165258	0.607674		76.7526
AhAP2-15	arahy.Tifrunner.gnm1.ann1.00XS3D.1	AP2	transcript:KEH31463	0.240728	1.0471	0.229899	1467	329	1138	234.333	185.667	0.205917	0.564336		64.4768
AhAP2-15	arahy.Tifrunner.gnm1.ann1.00XS3D.1	AP2	transcript:KEH27523	0.156939	1.22039	0.128597	1401	315.833	1085.17	153.667	190.333	0.141607	0.602639		75.1471
AhAP2-19	arahy.Tifrunner.gnm1.ann1.MRL478.1	AP2	transcript:AES81788	0.185841	0.70089	0.26515	1350	312.167	1037.83	170.833	142.167	0.164606	0.455419		43.1582
AhAP2-24	arahy.Tifrunner.gnm1.ann1.KDI7TH.1	AP2	transcript:AES67388	0.194748	0.748043	0.260344	1326	306.667	1019.33	174.833	145.167	0.171517	0.47337		46.0618
AhAP2-24	arahy.Tifrunner.gnm1.ann1.KDI7TH.1	AP2	transcript:KEH30075	0.272339	0.765504	0.355764	1305	302.25	1002.75	229	145	0.228372	0.479735		47.1369
AhAP2-54	arahy.Tifrunner.gnm1.ann1.YSN9W3.2	AP2	transcript:AES67388	0.121083	0.60385	0.200518	1389	322.5	1066.5	119.25	133.75	0.111814	0.414729		37.1829
AhAP2-54	arahy.Tifrunner.gnm1.ann1.YSN9W3.2	AP2	transcript:KEH30075	0.190444	0.628866	0.302838	1368	318.083	1049.92	176.583	135.417	0.168188	0.425727		38.7233
AhRAV-4	arahy.Tifrunner.gnm1.ann1.PZJ7B1.1	RAV	transcript:AES62073	0.16024	1.21319	0.132082	1089	260.167	828.833	119.583	156.417	0.144279	0.601217		74.7038
AhRAV-2	arahy.Tifrunner.gnm1.ann1.R3D0LA.1	RAV	transcript:AES62073	0.150747	1.25172	0.120432	1071	255.75	815.25	111.333	155.667	0.136563	0.608667		77.0762
AhSoloist-3	arahy.Tifrunner.gnm1.ann1.T9WCKL.1	Soloist	transcript:AES74774	0.258986	1.9614	0.132042	1068	231.25	836.75	183.25	160.75	0.219002	0.695135		120.776
AhSoloist-2	arahy.Tifrunner.gnm1.ann1.L32FWB.1	Soloist	transcript:KEH36640	0.315555	0.90265	0.349587	942	210.833	731.167	188.333	110.667	0.257579	0.524901		55.5819
AhSoloist-5	arahy.Tifrunner.gnm1.ann1.ZH29RS.1	Soloist	transcript:KEH36640	0.300092	0.89479	0.335377	942	210.833	731.167	180.833	110.167	0.247322	0.52253		55.0979
AhDREB-14	arahy.Tifrunner.gnm1.ann1.8V3MXA.1	DREB-V	transcript:AES68143	0.117841	0.893538	0.131881	519	114.75	404.25	44.0833	59.9167	0.10905	0.52215		55.0208
AhDREB-36	arahy.Tifrunner.gnm1.ann1.P2AB97.1	DREB-V	transcript:AES68143	0.117841	0.893538	0.131881	519	114.75	404.25	44.0833	59.9167	0.10905	0.52215		55.0208
AhDREB-1	arahy.Tifrunner.gnm1.ann1.CSV6ZK.1	DREB-V	transcript:AES91534	0.214576	1.64969	0.130071	633	141.333	491.667	91.75	94.25	0.18661	0.666863		101.582
AhDREB-16	arahy.Tifrunner.gnm1.ann1.3D7MPL.1	DREB-V	transcript:AES59013	0.257683	1.85034	0.139262	579	125.417	453.583	98.9167	86.0833	0.218078	0.686379		113.937
AhDREB-16	arahy.Tifrunner.gnm1.ann1.3D7MPL.1	DREB-V	transcript:AES73659	0.225623	1.07895	0.209114	615	133	482	93.9167	76.0833	0.194848	0.572055		66.4378
AhDREB-40	arahy.Tifrunner.gnm1.ann1.KDEH1Y.1	DREB-V	transcript:AES73659	0.207434	1.18623	0.174869	615	134	481	87.1667	79.8333	0.18122	0.595771		73.0435
AhDREB-21	arahy.Tifrunner.gnm1.ann1.MMJQ7K.1	DREB-V	transcript:AES73570	0.282057	1.56527	0.180198	483	103	380	89.3333	67.6667	0.235088	0.656958		96.3834
AhDREB-34	arahy.Tifrunner.gnm1.ann1.2YN4P9.1	DREB-V	transcript:AES73570	0.216132	0.889734	0.242918	552	121.083	430.917	80.9167	63.0833	0.187778	0.520991		54.7866
AhDREB-11	arahy.Tifrunner.gnm1.ann1.JRIM60.1	DREB-IV	transcript:AES73570	0.227601	0.888709	0.256103	561	122.917	438.083	86	64	0.19631	0.520678		54.7235
AhDREB-27	arahy.Tifrunner.gnm1.ann1.KQL0FY.1	DREB-IV	transcript:AES79603	0.335696	0.959074	0.350021	990	207.25	782.75	211.833	112.167	0.270627	0.541214		59.0563
AhDREB-4	arahy.Tifrunner.gnm1.ann1.U8GE9Q.1	DREB-IV	transcript:AES79603	0.410799	0.93553	0.439109	918	195.333	722.667	228.583	104.417	0.316305	0.534556		57.6065
AhDREB-25	arahy.Tifrunner.gnm1.ann1.KD4831.1	DREB-IV	transcript:AES79603	0.450944	0.783973	0.575203	1386	280	1106	374.833	136.167	0.338909	0.48631		48.2742
AhDREB-3	arahy.Tifrunner.gnm1.ann1.SE8WTS.1	DREB-IV	transcript:AES79603	0.413343	0.801364	0.515799	1383	277.917	1105.08	351.167	136.833	0.317774	0.492354		49.3451
AhDREB-39	arahy.Tifrunner.gnm1.ann1.L5HMHT.1	DREB-IV	transcript:AES67310	0.132389	6.23704	0.0212262	483	113.583	369.417	44.8333	85.1667	0.121363	0.749817		384.054
AhDREB-35	arahy.Tifrunner.gnm1.ann1.5KI8FH.1	DREB-IV	transcript:AES99658	0.411211	1.24897	0.329241	885	198.417	686.583	217.333	120.667	0.316543	0.608148		76.9068
AhDREB-12	arahy.Tifrunner.gnm1.ann1.73DHZN.1	DREB-IV	transcript:AES99658	0.413467	1.1539	0.358322	885	198.083	686.917	218.333	116.667	0.317845	0.588978		71.0528
AhDREB-15	arahy.Tifrunner.gnm1.ann1.15RNTX.1	DREB-IV	transcript:AES59595	0.265594	1.31587	0.20184	699	158	541	121	98	0.22366	0.620253		81.0262
AhDREB-15	arahy.Tifrunner.gnm1.ann1.15RNTX.1	DREB-IV	transcript:KEH36215	0.408084	1.12002	0.364356	657	150.75	506.25	159.333	87.6667	0.314733	0.581537		68.9665
AhDREB-32	arahy.Tifrunner.gnm1.ann1.301SU2.1	DREB-IV	transcript:AES59595	0.383119	1.61447	0.237303	711	153.5	557.5	167.25	101.75	0.3	0.662866		99.4134
AhDREB-32	arahy.Tifrunner.gnm1.ann1.301SU2.1	DREB-IV	transcript:KEH36215	0.443832	NaN	NaN	618	132.417	485.583	162.667	100.333	0.334992	0.757709	High Sequence Divergence Value (pS>=0.75)
AhDREB-10	arahy.Tifrunner.gnm1.ann1.B20XFZ.1	DREB-I	transcript:AES59595	0.380729	2.01098	0.189325	705	153.75	551.25	164.583	107.417	0.298564	0.698645		123.829
AhDREB-10	arahy.Tifrunner.gnm1.ann1.B20XFZ.1	DREB-I	transcript:KEH36215	0.482812	3.55751	0.135716	645	140.333	504.667	179.667	104.333	0.356011	0.743468		219.059
AhDREB-33	arahy.Tifrunner.gnm1.ann1.WP3ECB.1	DREB-I	transcript:AES81387	0.177553	0.719004	0.246942	843	183.083	659.917	104.333	84.6667	0.158101	0.462449		44.2737
AhDREB-13	arahy.Tifrunner.gnm1.ann1.XJX19T.1	DREB-I	transcript:AES99624	0.376894	1.374	0.274303	927	204.917	722.083	213.917	129.083	0.296249	0.629931		84.6062
AhDREB-20	arahy.Tifrunner.gnm1.ann1.17GHQZ.1	DREB-II	transcript:AES61896	0.315816	0.760675	0.415178	1071	240.417	830.583	214.083	114.917	0.257751	0.47799		46.8396
AhDREB-30	arahy.Tifrunner.gnm1.ann1.47NS3A.1	DREB-II	transcript:AES94645	0.14987	2.22324	0.0674108	474	115.75	358.25	48.6667	82.3333	0.135846	0.711303		136.899
AhDREB-6	arahy.Tifrunner.gnm1.ann1.VJ8B3Q.1	DREB-II	transcript:AES94645	0.157862	2.52475	0.062526	471	115.083	355.917	50.6667	83.3333	0.142355	0.724113		155.465
AhDREB-8	arahy.Tifrunner.gnm1.ann1.JE3RIW.1	DREB-III	transcript:AES93903	0.261542	1.24908	0.209388	477	110.167	366.833	81	67	0.220809	0.608169		76.9138
AhDREB-9	arahy.Tifrunner.gnm1.ann1.PSKQ19.1	DREB-III	transcript:KEH24686	0.217533	2.15426	0.100978	471	110	361	68.1667	77.8333	0.188827	0.707576		132.652
AhDREB-9	arahy.Tifrunner.gnm1.ann1.PSKQ19.1	DREB-III	transcript:KEH18632	0.231356	NaN	NaN	450	107.583	342.417	68.1667	90.8333	0.199075	0.844307	High Sequence Divergence Value (pS>=0.75)
AhDREB-23	arahy.Tifrunner.gnm1.ann1.X9M6WH.1	DREB-III	transcript:KEH18632	0.272128	NaN	NaN	513	127.417	385.583	88	102	0.228226	0.800523	High Sequence Divergence Value (pS>=0.75)
AhDREB-38	arahy.Tifrunner.gnm1.ann1.GS7VU5.1	DREB-III	transcript:KEH38960	0.420143	1.26874	0.331151	642	146.417	495.583	159.417	89.5833	0.321675	0.611838		78.1242
AhDREB-19	arahy.Tifrunner.gnm1.ann1.X2S259.1	DREB-III	transcript:AET01470	0.304031	2.65909	0.114337	597	139.583	457.417	114.333	101.667	0.249954	0.728358		163.737
AhDREB-41	arahy.Tifrunner.gnm1.ann1.YAEJ5M.1	DREB-III	transcript:AET01470	0.324071	3.81165	0.085021	597	138.75	458.25	120.583	103.417	0.263139	0.745345		234.708
AhDREB-37	arahy.Tifrunner.gnm1.ann1.9V08HM.1	DREB-III	transcript:AES67950	0.239233	1.46969	0.162777	558	126.75	431.25	88.3333	81.6667	0.204831	0.644313		90.4983
AhDREB-37	arahy.Tifrunner.gnm1.ann1.9V08HM.1	DREB-III	transcript:AET01470	0.281631	NaN	NaN	549	127	422	99.0833	102.917	0.234795	0.810367	High Sequence Divergence Value (pS>=0.75)
AhDREB-29	arahy.Tifrunner.gnm1.ann1.452FBF.1	DREB-III	transcript:AES90882	0.390902	1.35318	0.288878	660	161.333	498.667	151.917	101.083	0.304646	0.62655		83.3236
AhDREB-29	arahy.Tifrunner.gnm1.ann1.452FBF.1	DREB-III	transcript:AES94296	0.357716	1.5746	0.227179	534	123.333	410.667	116.833	81.1667	0.284497	0.658108		96.9578
AhDREB-5	arahy.Tifrunner.gnm1.ann1.FAI7YU.1	DREB-III	transcript:AES90882	0.390902	1.35318	0.288878	660	161.333	498.667	151.917	101.083	0.304646	0.62655		83.3236
AhDREB-5	arahy.Tifrunner.gnm1.ann1.FAI7YU.1	DREB-III	transcript:AES94296	0.357716	1.5746	0.227179	534	123.333	410.667	116.833	81.1667	0.284497	0.658108		96.9578
AhDREB-2	arahy.Tifrunner.gnm1.ann1.K6GECI.1	DREB-III	transcript:AET01204	0.375316	3.68559	0.101833	591	132.417	458.583	135.417	98.5833	0.295293	0.744493		226.945
AhDREB-24	arahy.Tifrunner.gnm1.ann1.VUU22W.1	ERF-VI	transcript:AET01204	0.385576	3.88023	0.0993696	591	132.417	458.583	138.25	98.75	0.301472	0.745752		238.93
AhERF-52	arahy.Tifrunner.gnm1.ann1.N4EN9H.1	ERF-VI	transcript:AES93982	0.364597	2.26493	0.160975	819	187.25	631.75	182.417	133.583	0.288748	0.713396		139.466
AhERF-52	arahy.Tifrunner.gnm1.ann1.N4EN9H.1	ERF-VI	transcript:KEH21185	0.4734	2.22213	0.213038	840	191.917	648.083	227.5	136.5	0.351035	0.711246		136.831
AhERF-25	arahy.Tifrunner.gnm1.ann1.Q66BD2.1	ERF-VIII	transcript:AES72437	0.272357	1.75093	0.15555	1008	231.167	776.833	177.417	156.583	0.228384	0.677361		107.816
AhERF-7	arahy.Tifrunner.gnm1.ann1.WBA6PF.1	ERF-VIII	transcript:AET03416	0.795284	NaN	NaN	1047	234.5	812.5	398.333	178.667	0.490256	0.761905	High Sequence Divergence Value (pS>=0.75)
AhERF-44	arahy.Tifrunner.gnm1.ann1.8UYF3G.1	ERF-VIII	transcript:AET03416	0.800983	NaN	NaN	1089	242.5	846.5	416.667	187.333	0.492223	0.772509	High Sequence Divergence Value (pS>=0.75)
AhERF-30	arahy.Tifrunner.gnm1.ann1.C5BSUS.1	ERF-VIII	transcript:AES64208	0.457745	0.799367	0.572634	882	200	682	233.667	98.3333	0.34262	0.491667		49.2221
AhERF-70	arahy.Tifrunner.gnm1.ann1.ZQ3898.1	ERF-VIII	transcript:AES64208	0.441866	0.771317	0.572873	882	199.417	682.583	227.917	96.0833	0.333903	0.481822		47.4949
AhERF-74	arahy.Tifrunner.gnm1.ann1.57AKVM.1	ERF-VIII	transcript:AES63877	0.142242	1.5096	0.0942253	510	138.25	371.75	48.1667	89.8333	0.129567	0.649789		92.9555
AhERF-34	arahy.Tifrunner.gnm1.ann1.ILN3K9.1	ERF-VIII	transcript:AES63877	0.138989	1.30512	0.106495	510	136.917	373.083	47.3333	84.6667	0.126871	0.618381		80.3646
AhERF-43	arahy.Tifrunner.gnm1.ann1.4AG551.1	ERF-VIII	transcript:AES63877	0.291889	1.9037	0.153327	492	131.5	360.5	87.1667	90.8333	0.241794	0.690748		117.223
AhERF-40	arahy.Tifrunner.gnm1.ann1.HGAZ7D.1	ERF-VIII	transcript:AES89693	0.242835	0.979689	0.24787	633	149.333	483.667	100.333	81.6667	0.207443	0.546875		60.3257
AhERF-73	arahy.Tifrunner.gnm1.ann1.AS0C7C.1	ERF-VIII	transcript:AES63881	0.162781	1.65722	0.0982249	564	135.167	428.833	62.75	90.25	0.146327	0.667694		102.046
AhERF-33	arahy.Tifrunner.gnm1.ann1.QGFJ76.1	ERF-VIII	transcript:AES63881	0.162781	1.42686	0.114083	564	135.167	428.833	62.75	86.25	0.146327	0.638101		87.8607
AhERF-23	arahy.Tifrunner.gnm1.ann1.JEZR1W.1	ERF-VIII	transcript:KEH33908	0.257411	1.36169	0.189039	639	162.833	476.167	103.75	102.25	0.217886	0.627943		83.8477
AhERF-24	arahy.Tifrunner.gnm1.ann1.DY3CW6.1	ERF-VIII	transcript:AES99819	0.415403	NaN	NaN	636	158.667	477.333	152.25	128.75	0.318959	0.81145	High Sequence Divergence Value (pS>=0.75)
AhERF-63	arahy.Tifrunner.gnm1.ann1.RX34PI.1	ERF-VI-L	transcript:AES99819	0.411258	NaN	NaN	636	158.75	477.25	151.083	129.917	0.316571	0.818373	High Sequence Divergence Value (pS>=0.75)
AhERF-28	arahy.Tifrunner.gnm1.ann1.J0DG7J.1	ERF-VI-L	transcript:KEH44224	0.470788	NaN	NaN	936	212.167	723.833	253.083	165.917	0.349643	0.782011	High Sequence Divergence Value (pS>=0.75)
AhERF-69	arahy.Tifrunner.gnm1.ann1.VG3SGX.1	ERF-X	transcript:KEH44224	0.470066	NaN	NaN	930	211.333	718.667	251	164	0.349258	0.776025	High Sequence Divergence Value (pS>=0.75)
AhERF-11	arahy.Tifrunner.gnm1.ann1.5I2TXN.1	ERF-X	transcript:AES77848	0.184366	0.698835	0.263819	522	115.667	406.333	66.4167	52.5833	0.163454	0.454611		43.0317
AhERF-49	arahy.Tifrunner.gnm1.ann1.ARVN7W.1	ERF-X	transcript:AES77848	0.184366	0.698835	0.263819	522	115.667	406.333	66.4167	52.5833	0.163454	0.454611		43.0317
AhERF-22	arahy.Tifrunner.gnm1.ann1.E9BLTS.1	ERF-X	transcript:KEH25639	0.306412	1.26788	0.241673	585	138.417	446.583	112.333	84.6667	0.251539	0.61168		78.0712
AhERF-26	arahy.Tifrunner.gnm1.ann1.2Q12N5.1	ERF-X	transcript:AES72998	0.278961	0.978721	0.285026	639	143.917	495.083	115.333	78.6667	0.232957	0.546613		60.266
AhERF-66	arahy.Tifrunner.gnm1.ann1.B66PX0.1	ERF-X	transcript:AES72998	0.316573	0.995862	0.317888	645	144.833	500.167	129.167	79.8333	0.258247	0.551208		61.3215
AhERF-68	arahy.Tifrunner.gnm1.ann1.2Y0GDL.1	ERF-X	transcript:AES62326	0.504156	1.05147	0.479478	993	239.5	753.5	276.583	135.417	0.367065	0.565414		64.7456
AhERF-29	arahy.Tifrunner.gnm1.ann1.P2THRP.1	ERF-X	transcript:AES62326	0.455669	0.990454	0.460061	981	235.25	745.75	254.667	129.333	0.341491	0.54977		60.9885
AhERF-6	arahy.Tifrunner.gnm1.ann1.2AHI7R.1	ERF-X	transcript:AET04637	0.414717	0.983421	0.421708	846	202.75	643.25	204.917	111.083	0.318565	0.547883		60.5555
AhERF-42	arahy.Tifrunner.gnm1.ann1.F2D5GR.1	ERF-X	transcript:AES72765	0.350457	0.903301	0.387974	879	215.833	663.167	185.667	113.333	0.27997	0.525097		55.622
AhERF-42	arahy.Tifrunner.gnm1.ann1.F2D5GR.1	ERF-X	transcript:AET04637	0.423196	0.931762	0.454189	843	201.667	641.333	207.417	107.583	0.323415	0.533471		57.3745
AhERF-35	arahy.Tifrunner.gnm1.ann1.768P1R.1	ERF-X	transcript:AES72765	0.404878	1.14372	0.354002	954	231.917	722.083	225.917	136.083	0.312868	0.586777		70.4259
AhERF-76	arahy.Tifrunner.gnm1.ann1.EZ5RGK.1	ERF-VII	transcript:AES72765	0.374967	1.31581	0.28497	954	232.167	721.833	213	144	0.295082	0.620244		81.023
AhERF-55	arahy.Tifrunner.gnm1.ann1.GIJ59W.1	ERF-VII	transcript:KEH42535	0.283927	0.795051	0.357117	345	80.5833	264.417	62.5	39.5	0.236369	0.490176		48.9563
AhERF-55	arahy.Tifrunner.gnm1.ann1.GIJ59W.1	ERF-VII	transcript:KEH23916	0.211873	0.731791	0.289526	336	77.75	258.25	47.6667	36.3333	0.184576	0.46731		45.061
AhERF-46	arahy.Tifrunner.gnm1.ann1.ER44IM.1	ERF-VII	transcript:KEH37187	0.370894	1.3219	0.280577	705	157.333	547.667	160.25	97.75	0.292605	0.621292		81.3976
AhERF-20	arahy.Tifrunner.gnm1.ann1.GP7L65.1	ERF-VII	transcript:AES61725	0.290206	1.18112	0.245704	807	183	624	150.167	108.833	0.240652	0.594718		72.7291
AhERF-4	arahy.Tifrunner.gnm1.ann1.VF7WU9.1	ERF-IX	transcript:AET01895	0.201977	1.21224	0.166615	1107	242.917	864.083	153	146	0.177066	0.601029		74.6454
AhERF-67	arahy.Tifrunner.gnm1.ann1.87AL67.1	ERF-IX	transcript:AES61908	0.385909	1.14099	0.338223	546	117	429	129.417	68.5833	0.301671	0.586182		70.258
AhERF-27	arahy.Tifrunner.gnm1.ann1.KF0N62.1	ERF-IX	transcript:AES61908	0.344016	0.988681	0.347955	546	118.333	427.667	118	65	0.275916	0.549296		60.8794
AhERF-50	arahy.Tifrunner.gnm1.ann1.FU6CIC.1	ERF-IX	transcript:AES90857	0.292383	2.25928	0.129414	753	173.417	579.583	140.333	123.667	0.242128	0.713119		139.118
AhERF-12	arahy.Tifrunner.gnm1.ann1.JGE7BU.1	ERF-IX	transcript:AES90857	0.292383	2.25928	0.129414	753	173.417	579.583	140.333	123.667	0.242128	0.713119		139.118
AhERF-51	arahy.Tifrunner.gnm1.ann1.4XS3FZ.1	ERF-IX	transcript:AES90855	0.159834	1.4441	0.110681	795	196.417	598.583	86.1667	125.833	0.143951	0.640645		88.9227
AhERF-13	arahy.Tifrunner.gnm1.ann1.ZW7540.1	ERF-IX	transcript:AES90855	0.159834	1.4441	0.110681	795	196.417	598.583	86.1667	125.833	0.143951	0.640645		88.9227
AhERF-47	arahy.Tifrunner.gnm1.ann1.BDR3J7.1	ERF-IX	transcript:KEH23452	0.351488	1.43969	0.244141	525	118.75	406.25	114	76	0.280615	0.64		88.6511
AhERF-71	arahy.Tifrunner.gnm1.ann1.EAK3RU.1	ERF-IX	transcript:AES63941	0.521642	0.936009	0.557304	465	102.083	362.917	136.417	54.5833	0.37589	0.534694		57.636
AhERF-71	arahy.Tifrunner.gnm1.ann1.EAK3RU.1	ERF-IX	transcript:KEH30939	0.499719	NaN	NaN	360	78.3333	281.667	102.75	59.25	0.364793	0.756383	High Sequence Divergence Value (pS>=0.75)
AhERF-31	arahy.Tifrunner.gnm1.ann1.T22KDW.1	ERF-IX	transcript:AES63941	0.478119	1.23099	0.388401	456	102.667	353.333	124.917	62.0833	0.353538	0.604708		75.8002
AhERF-31	arahy.Tifrunner.gnm1.ann1.T22KDW.1	ERF-IX	transcript:KEH30939	0.500872	2.67185	0.187463	360	78.3333	281.667	102.917	57.0833	0.365385	0.728723		164.523
AhERF-5	arahy.Tifrunner.gnm1.ann1.QR2UB9.1	ERF-IX	transcript:KEH42537	0.366674	1.05056	0.349026	630	135.5	494.5	143.417	76.5833	0.290024	0.565191		64.6897
Mean				0.281891	1.07895	0.245704	885	201.667	686.583	157.417	113.333	0.234973	0.586777		66.4378

## Sheet: Table S9
Supplementary Table S9. The Ka/Ks ratios and estimated divergence time for orthologous AP2/ERF genes between A. hypogaea cv. Tifrunner and Glycine max L.
Gene name	PeanutBase Locus Identifier	Fanily-Group	Locus Identifier	Ka	Ks	Ka_Ks	EffectiveLen	AverageS-sites	AverageN-sites	cN	cS	pN	pS	Note	Mya
AhAP2-37	arahy.Tifrunner.gnm1.ann1.L4Q0K2.1	AP2	transcript:KRH29690	0.187077	1.06763	0.175227	1380	303.417	1076.58	178.25	172.75	0.16557	0.569349		65.7408
AhAP2-37	arahy.Tifrunner.gnm1.ann1.L4Q0K2.1	AP2	transcript:KRH24688	0.181301	0.856369	0.211709	1368	299.5	1068.5	172.083	152.917	0.161051	0.510573		52.7321
AhAP2-6	arahy.Tifrunner.gnm1.ann1.TN1J43.1	AP2	transcript:KRH29690	0.204398	1.11395	0.183489	1395	305.083	1089.92	195	177	0.178913	0.580169		68.5932
AhAP2-6	arahy.Tifrunner.gnm1.ann1.TN1J43.1	AP2	transcript:KRH24688	0.196409	0.855636	0.229547	1383	302.25	1080.75	186.75	154.25	0.172797	0.510339		52.687
AhAP2-10	arahy.Tifrunner.gnm1.ann1.6BK6B8.1	AP2	transcript:KRH00957	0.306913	1.04686	0.293175	1911	431.083	1479.92	372.75	243.25	0.251872	0.564276		64.4618
AhAP2-10	arahy.Tifrunner.gnm1.ann1.6BK6B8.1	AP2	transcript:KRH40267	0.266993	1.0041	0.265901	1908	430.083	1477.92	332	238	0.224641	0.553381		61.8291
AhAP2-10	arahy.Tifrunner.gnm1.ann1.6BK6B8.1	AP2	transcript:KRH19032	0.602605	NaN	NaN	1476	345.833	1130.17	468.083	261.917	0.414172	0.757349	High Sequence Divergence Value (pS>=0.75)
AhAP2-10	arahy.Tifrunner.gnm1.ann1.6BK6B8.1	AP2	transcript:KRH02858	0.618625	NaN	NaN	1503	347.167	1155.83	486.917	273.083	0.421269	0.786606	High Sequence Divergence Value (pS>=0.75)
AhAP2-35	arahy.Tifrunner.gnm1.ann1.XI0ITM.1	AP2	transcript:KRH19032	0.178418	0.885357	0.201521	1341	324.417	1016.58	161.417	168.583	0.158784	0.519651		54.5171
AhAP2-35	arahy.Tifrunner.gnm1.ann1.XI0ITM.1	AP2	transcript:KRH02858	0.183461	0.912296	0.201098	1344	324	1020	166	171	0.162745	0.527778		56.1759
AhAP2-40	arahy.Tifrunner.gnm1.ann1.HP6LSM.1	AP2	transcript:KRH00957	0.294986	1.0154	0.290513	1767	400.25	1366.75	333.333	222.667	0.243888	0.556319		62.5243
AhAP2-40	arahy.Tifrunner.gnm1.ann1.HP6LSM.1	AP2	transcript:KRH40267	0.274171	1.02182	0.268316	1776	402.5	1373.5	315.417	224.583	0.229644	0.557971		62.92
AhAP2-23	arahy.Tifrunner.gnm1.ann1.ETC6KF.1	AP2	transcript:KRH29690	0.270328	1.50539	0.179574	1254	285.083	968.917	219.917	185.083	0.226972	0.649225		92.6964
AhAP2-23	arahy.Tifrunner.gnm1.ann1.ETC6KF.1	AP2	transcript:KRH24688	0.240559	1.3903	0.173026	1218	277.333	940.667	193.583	175.417	0.205794	0.632512		85.6098
AhAP2-42	arahy.Tifrunner.gnm1.ann1.N9BW0I.1	AP2	transcript:KRH74476	0.113982	0.796835	0.143044	1476	353	1123	118.75	173.25	0.105744	0.490793		49.0662
AhAP2-42	arahy.Tifrunner.gnm1.ann1.N9BW0I.1	AP2	transcript:KRH39470	0.123931	0.835052	0.148411	1479	351.917	1127.08	128.75	177.25	0.114233	0.50367		51.4195
AhAP2-42	arahy.Tifrunner.gnm1.ann1.N9BW0I.1	AP2	transcript:KRH45549	0.232593	0.923402	0.251887	1278	303.333	974.667	194.917	161.083	0.199983	0.531044		56.8597
AhAP2-13	arahy.Tifrunner.gnm1.ann1.RWA9J9.1	AP2	transcript:KRH74476	0.113982	0.796835	0.143044	1476	353	1123	118.75	173.25	0.105744	0.490793		49.0662
AhAP2-13	arahy.Tifrunner.gnm1.ann1.RWA9J9.1	AP2	transcript:KRH45549	0.232593	0.923402	0.251887	1278	303.333	974.667	194.917	161.083	0.199983	0.531044		56.8597
AhAP2-13	arahy.Tifrunner.gnm1.ann1.RWA9J9.1	AP2	transcript:KRH39470	0.123931	0.835052	0.148411	1479	351.917	1127.08	128.75	177.25	0.114233	0.50367		51.4195
AhAP2-38	arahy.Tifrunner.gnm1.ann1.WU5RMI.1	AP2	transcript:KRH74476	0.381526	1.25816	0.303242	1056	254.833	801.167	239.583	155.417	0.299043	0.609876		77.4728
AhAP2-38	arahy.Tifrunner.gnm1.ann1.WU5RMI.1	AP2	transcript:KRG99477	0.512054	2.17094	0.235867	1062	257.583	804.417	298.5	182.5	0.371076	0.708509		133.679
AhAP2-8	arahy.Tifrunner.gnm1.ann1.RN6KV5.2	AP2	transcript:KRH74476	0.384522	1.35191	0.284428	1059	256.25	802.75	241.5	160.5	0.300841	0.626341		83.2458
AhAP2-8	arahy.Tifrunner.gnm1.ann1.RN6KV5.2	AP2	transcript:KRG99477	0.502191	1.66871	0.300945	1053	256	797	291.75	171.25	0.36606	0.668945		102.753
AhAP2-52	arahy.Tifrunner.gnm1.ann1.J9H0YQ.1	AP2	transcript:KRH61449	0.24134	0.98801	0.244269	1659	372.417	1286.58	265.5	204.5	0.206361	0.549116		60.838
AhAP2-52	arahy.Tifrunner.gnm1.ann1.J9H0YQ.1	AP2	transcript:KRH52140	0.233502	0.816292	0.286052	1656	373.083	1282.92	257.417	185.583	0.20065	0.497431		50.2643
AhAP2-21	arahy.Tifrunner.gnm1.ann1.9T6609.1	AP2	transcript:KRH15454	0.271046	0.997037	0.271852	1533	337.25	1195.75	272	186	0.227472	0.55152		61.3939
AhAP2-21	arahy.Tifrunner.gnm1.ann1.9T6609.1	AP2	transcript:KRH52140	0.320142	1.1798	0.271352	1776	390	1386	361.167	231.833	0.260582	0.594444		72.6479
AhAP2-21	arahy.Tifrunner.gnm1.ann1.9T6609.1	AP2	transcript:KRH61449	0.305023	1.14371	0.266697	1776	389.417	1386.58	347.5	228.5	0.250616	0.586775		70.4254
AhAP2-51	arahy.Tifrunner.gnm1.ann1.ZL8GWI.1	AP2	transcript:KRH61449	0.313048	1.1271	0.277747	1782	391	1391	356	228	0.255931	0.58312		69.4027
AhAP2-51	arahy.Tifrunner.gnm1.ann1.ZL8GWI.1	AP2	transcript:KRH52140	0.320631	1.01535	0.315782	1785	393.667	1391.33	363	219	0.260901	0.556308		62.5218
AhAP2-22	arahy.Tifrunner.gnm1.ann1.7SA24Y.1	AP2	transcript:KRH61449	0.237712	1.09643	0.216806	1554	350.167	1203.83	245.25	201.75	0.203724	0.576154		67.5141
AhAP2-22	arahy.Tifrunner.gnm1.ann1.7SA24Y.1	AP2	transcript:KRH52140	0.234552	0.93493	0.250877	1548	349	1199	241.5	186.5	0.201418	0.534384		57.5696
AhAP2-2	arahy.Tifrunner.gnm1.ann1.M71NXQ.1	AP2	transcript:KRH77164	0.345959	1.00557	0.344043	1563	346.417	1216.58	337.167	191.833	0.277142	0.553765		61.9193
AhAP2-2	arahy.Tifrunner.gnm1.ann1.M71NXQ.1	AP2	transcript:KRH58159	0.244086	0.917925	0.265911	1608	358.083	1249.92	260.417	189.583	0.208347	0.529439		56.5225
AhAP2-2	arahy.Tifrunner.gnm1.ann1.M71NXQ.1	AP2	transcript:KRH04380	0.225321	0.786051	0.286649	1575	350.417	1224.58	238.333	170.667	0.194624	0.487039		48.4022
AhAP2-2	arahy.Tifrunner.gnm1.ann1.M71NXQ.1	AP2	transcript:KRH28323	0.316608	1.06536	0.297185	1563	348.833	1214.17	313.583	198.417	0.25827	0.568801		65.6008
AhAP2-31	arahy.Tifrunner.gnm1.ann1.ULX5CX.1	AP2	transcript:KRH77164	0.360258	1.09789	0.328136	1581	350.25	1230.75	352.083	201.917	0.286072	0.576493		67.6041
AhAP2-31	arahy.Tifrunner.gnm1.ann1.ULX5CX.1	AP2	transcript:KRH04380	0.23833	0.732479	0.325374	1611	357.167	1253.83	256	167	0.204174	0.467569		45.1034
AhAP2-43	arahy.Tifrunner.gnm1.ann1.6V99EA.1	AP2	transcript:KRH77164	0.299942	0.635473	0.471997	1488	326.083	1161.92	287.25	139.75	0.247221	0.428571		39.1301
AhAP2-43	arahy.Tifrunner.gnm1.ann1.6V99EA.1	AP2	transcript:KRH28323	0.257433	0.701519	0.366964	1434	317.667	1116.33	243.25	144.75	0.217901	0.455666		43.197
AhAP2-43	arahy.Tifrunner.gnm1.ann1.6V99EA.1	AP2	transcript:KRH58159	0.256011	0.792244	0.323147	1506	331.833	1174.17	254.667	162.333	0.216891	0.489201		48.7835
AhAP2-43	arahy.Tifrunner.gnm1.ann1.6V99EA.1	AP2	transcript:KRH04380	0.248842	0.790078	0.314959	1512	335.417	1176.58	249.167	163.833	0.211771	0.488447		48.6501
AhAP2-59	arahy.Tifrunner.gnm1.ann1.5MV2CV.1	AP2	transcript:KRH01131	0.166497	0.64024	0.260053	1008	222.167	785.833	117.333	95.6667	0.149311	0.430608		39.4236
AhAP2-28	arahy.Tifrunner.gnm1.ann1.F0M2KT.1	AP2	transcript:KRH01131	0.161649	0.603391	0.267901	1002	220.333	781.667	113.667	91.3333	0.145416	0.414523		37.1546
AhAP2-12	arahy.Tifrunner.gnm1.ann1.F5Q2PM.1	AP2	transcript:KRH01131	0.223246	0.783349	0.284988	1005	221.667	783.333	151.25	107.75	0.193085	0.48609		48.2358
AhAP2-12	arahy.Tifrunner.gnm1.ann1.F5Q2PM.1	AP2	transcript:KRH40131	0.206209	0.744939	0.276813	1005	222	783	141.167	104.833	0.180289	0.472222		45.8706
AhAP2-41	arahy.Tifrunner.gnm1.ann1.I3YYWX.1	AP2	transcript:KRH01131	0.227296	0.753579	0.301622	1023	227	796	156.083	107.917	0.196085	0.475404		46.4026
AhAP2-41	arahy.Tifrunner.gnm1.ann1.I3YYWX.1	AP2	transcript:KRH40131	0.211673	0.722091	0.293139	1023	226.833	796.167	146.833	105.167	0.184425	0.46363		44.4637
AhAP2-49	arahy.Tifrunner.gnm1.ann1.6MJ8Q6.1	AP2	transcript:KRG95240	0.0833166	0.565586	0.14731	1239	283.667	955.333	75.3333	112.667	0.0788555	0.39718		34.8267
AhAP2-49	arahy.Tifrunner.gnm1.ann1.6MJ8Q6.1	AP2	transcript:KRH66909	0.0872636	0.616443	0.14156	1251	283.917	967.083	79.6667	119.333	0.0823783	0.420311		37.9583
AhAP2-17	arahy.Tifrunner.gnm1.ann1.AE6IJA.1	AP2	transcript:KRG95240	0.0833397	0.587625	0.141825	1239	283.917	955.083	75.3333	115.667	0.0788762	0.407397		36.1838
AhAP2-17	arahy.Tifrunner.gnm1.ann1.AE6IJA.1	AP2	transcript:KRH66909	0.0872716	0.640577	0.136239	1251	284	967	79.6667	122.333	0.0823854	0.430751		39.4444
AhAP2-26	arahy.Tifrunner.gnm1.ann1.Y9PZ1H.1	AP2	transcript:KRH47304	0.175355	0.849851	0.206336	735	162.083	572.917	89.5833	82.4167	0.156364	0.508483		52.3307
AhAP2-26	arahy.Tifrunner.gnm1.ann1.Y9PZ1H.1	AP2	transcript:KRH44591	0.189985	0.986803	0.192525	762	165.667	596.333	100.083	90.9167	0.167831	0.548793		60.7638
AhAP2-33	arahy.Tifrunner.gnm1.ann1.HG2532.2	AP2	transcript:KRH02994	0.186569	0.741707	0.251539	1035	225.75	809.25	133.667	106.333	0.165174	0.471023		45.6716
AhAP2-33	arahy.Tifrunner.gnm1.ann1.HG2532.2	AP2	transcript:KRH72352	0.179984	0.916264	0.196433	1023	223.083	799.917	128	118	0.160017	0.52895		56.4202
AhAP2-4	arahy.Tifrunner.gnm1.ann1.KP68JR.1	AP2	transcript:KRH02994	0.177045	0.757947	0.233586	1011	221	790	124.583	105.417	0.1577	0.476998		46.6716
AhAP2-4	arahy.Tifrunner.gnm1.ann1.KP68JR.1	AP2	transcript:KRH72352	0.171881	0.91001	0.188879	999	218.333	780.667	119.917	115.083	0.153608	0.527099		56.0351
AhAP2-29	arahy.Tifrunner.gnm1.ann1.H1PWIN.1	AP2	transcript:KRH77030	0.122976	0.713102	0.172452	936	207.167	728.833	82.6667	95.3333	0.113423	0.460177		43.9102
AhAP2-29	arahy.Tifrunner.gnm1.ann1.H1PWIN.1	AP2	transcript:KRH04560	0.0908966	0.576528	0.157662	948	211.083	736.917	63.0833	84.9167	0.0856044	0.40229		35.5005
AhAP2-29	arahy.Tifrunner.gnm1.ann1.H1PWIN.1	AP2	transcript:KRH28441	0.0982523	0.63937	0.15367	933	207.25	725.75	66.8333	89.1667	0.0920886	0.430237		39.3701
AhAP2-5	arahy.Tifrunner.gnm1.ann1.K6QUG2.1	AP2	transcript:KRH24963	0.134802	0.466983	0.288665	1425	330.833	1094.17	135	115	0.123382	0.347607		28.7551
AhAP2-5	arahy.Tifrunner.gnm1.ann1.K6QUG2.1	AP2	transcript:KRH10362	0.138068	0.590009	0.23401	1365	318.25	1046.75	132	130	0.126105	0.408484		36.3306
AhAP2-5	arahy.Tifrunner.gnm1.ann1.K6QUG2.1	AP2	transcript:KRH22957	0.12888	0.564026	0.228501	1377	323.5	1053.5	124.75	128.25	0.118415	0.396445		34.7307
AhAP2-36	arahy.Tifrunner.gnm1.ann1.QEK7F9.1	AP2	transcript:KRH24963	0.13348	0.473393	0.281964	1425	331.167	1093.83	133.75	116.25	0.122276	0.351032		29.1498
AhAP2-36	arahy.Tifrunner.gnm1.ann1.QEK7F9.1	AP2	transcript:KRH10362	0.142676	0.596941	0.239011	1365	318.25	1046.75	136	131	0.129926	0.411626		36.7575
AhAP2-36	arahy.Tifrunner.gnm1.ann1.QEK7F9.1	AP2	transcript:KRH22957	0.128599	0.559124	0.23	1377	323.5	1053.5	124.5	127.5	0.118178	0.394127		34.4288
AhAP2-45	arahy.Tifrunner.gnm1.ann1.4G06NJ.2	AP2	transcript:KRH77030	0.174483	0.795351	0.219379	1383	312.917	1070.08	166.583	153.417	0.155673	0.49028		48.9748
AhAP2-45	arahy.Tifrunner.gnm1.ann1.4G06NJ.2	AP2	transcript:KRH28441	0.164676	0.788797	0.208769	1371	312.5	1058.5	156.5	152.5	0.147851	0.488		48.5712
AhAP2-45	arahy.Tifrunner.gnm1.ann1.4G06NJ.2	AP2	transcript:KRH04560	0.193092	0.802441	0.240631	1425	320.667	1104.33	188	158	0.170238	0.492723		49.4114
AhAP2-15	arahy.Tifrunner.gnm1.ann1.00XS3D.1	AP2	transcript:KRH77030	0.158735	0.827419	0.191844	1428	325.917	1102.08	157.667	163.333	0.143062	0.501151		50.9494
AhAP2-15	arahy.Tifrunner.gnm1.ann1.00XS3D.1	AP2	transcript:KRH04560	0.191396	0.775954	0.246659	1464	332.833	1131.17	191.083	160.917	0.168926	0.483475		47.7804
AhAP2-15	arahy.Tifrunner.gnm1.ann1.00XS3D.1	AP2	transcript:KRH28441	0.142379	0.826725	0.17222	1383	316.917	1066.08	138.25	158.75	0.12968	0.50092		50.9067
AhAP2-19	arahy.Tifrunner.gnm1.ann1.MRL478.1	AP2	transcript:KRG95917	0.131563	0.55792	0.23581	1350	315.5	1034.5	124.833	124.167	0.12067	0.393555		34.3547
AhAP2-19	arahy.Tifrunner.gnm1.ann1.MRL478.1	AP2	transcript:KRH67634	0.133923	0.527224	0.254015	1347	315.583	1031.42	126.5	119.5	0.122647	0.378664		32.4645
AhAP2-24	arahy.Tifrunner.gnm1.ann1.KDI7TH.1	AP2	transcript:KRH22957	0.164968	0.56518	0.291886	1347	315.5	1031.5	152.75	125.25	0.148085	0.396989		34.8017
AhAP2-24	arahy.Tifrunner.gnm1.ann1.KDI7TH.1	AP2	transcript:KRH10362	0.170249	0.494398	0.344356	1332	310.5	1021.5	155.583	112.417	0.152309	0.36205		30.4433
AhAP2-54	arahy.Tifrunner.gnm1.ann1.YSN9W3.2	AP2	transcript:KRH22957	0.0921357	0.457151	0.201543	1410	331.583	1078.42	93.5	113.5	0.0867012	0.342297		28.1497
AhAP2-54	arahy.Tifrunner.gnm1.ann1.YSN9W3.2	AP2	transcript:KRH10362	0.0973043	0.41718	0.233243	1395	326.583	1068.42	97.5	104.5	0.0912565	0.31998		25.6884
AhRAV-1	arahy.Tifrunner.gnm1.ann1.PDF2MW.1	RAV	transcript:KRH75484	0.130678	1.05248	0.124162	1137	268.417	868.583	104.167	151.833	0.119927	0.565663		64.8079
AhRAV-3	arahy.Tifrunner.gnm1.ann1.QDL5QZ.1	RAV	transcript:KRH75484	0.130719	1.11332	0.117414	1137	268.667	868.333	104.167	155.833	0.119962	0.580025		68.5539
AhRAV-4	arahy.Tifrunner.gnm1.ann1.PZJ7B1.1	RAV	transcript:KRH34761	0.147974	0.781802	0.189273	1005	239.25	765.75	102.833	116.167	0.134291	0.485545		48.1405
AhRAV-4	arahy.Tifrunner.gnm1.ann1.PZJ7B1.1	RAV	transcript:KRG92025	0.146533	0.7953	0.184248	1032	248.167	783.833	104.333	121.667	0.133107	0.490262		48.9717
AhRAV-2	arahy.Tifrunner.gnm1.ann1.R3D0LA.1	RAV	transcript:KRH34761	0.156027	0.723485	0.21566	1005	239.5	765.5	107.833	111.167	0.140867	0.464161		44.5495
AhRAV-2	arahy.Tifrunner.gnm1.ann1.R3D0LA.1	RAV	transcript:KRG92025	0.162373	0.750484	0.216358	1032	247.75	784.25	114.5	117.5	0.145999	0.474268		46.2121
AhSoloist-3	arahy.Tifrunner.gnm1.ann1.T9WCKL.1	Soloist	transcript:KRH18447	0.22126	1.11715	0.198057	1101	239	862	165.167	138.833	0.191609	0.580893		68.7903
AhSoloist-3	arahy.Tifrunner.gnm1.ann1.T9WCKL.1	Soloist	transcript:KRG93579	0.216536	1.29674	0.166985	1098	236.667	861.333	162	146	0.18808	0.616901		79.8484
AhSoloist-3	arahy.Tifrunner.gnm1.ann1.T9WCKL.1	Soloist	transcript:KRH01227	0.281111	1.66348	0.16899	1119	243.5	875.5	205.25	162.75	0.234437	0.668378		102.431
AhSoloist-2	arahy.Tifrunner.gnm1.ann1.L32FWB.1	Soloist	transcript:KRH21225	0.289297	0.775623	0.372987	1008	230.333	777.667	186.667	111.333	0.240034	0.483357		47.76
AhSoloist-2	arahy.Tifrunner.gnm1.ann1.L32FWB.1	Soloist	transcript:KRH11052	0.266787	0.700268	0.380979	990	228.667	761.333	170.917	104.083	0.224496	0.455175		43.12
AhSoloist-5	arahy.Tifrunner.gnm1.ann1.ZH29RS.1	Soloist	transcript:KRH21225	0.308196	0.795963	0.387199	1020	232.25	787.75	199.083	113.917	0.252724	0.490492		49.0125
AhSoloist-5	arahy.Tifrunner.gnm1.ann1.ZH29RS.1	Soloist	transcript:KRH11052	0.293733	0.740082	0.396892	999	229.583	769.417	187	108	0.243041	0.470417		45.5715
AhDREB-7	arahy.Tifrunner.gnm1.ann1.0IM2G4.1	DREB-III	transcript:KRH77484	0.284134	0.853568	0.332877	540	129.167	410.833	97.1667	65.8333	0.236511	0.509677		52.5596
AhDREB-31	arahy.Tifrunner.gnm1.ann1.RJA1IC.1	DREB-III	transcript:KRH77484	0.24864	0.889129	0.279644	531	128.167	402.833	85.25	66.75	0.211626	0.520806		54.7493
AhDREB-9	arahy.Tifrunner.gnm1.ann1.PSKQ19.1	DREB-III	transcript:KRH06455	0.208001	0.900078	0.231092	471	112.25	358.75	65.1667	58.8333	0.181649	0.524128		55.4235
AhDREB-9	arahy.Tifrunner.gnm1.ann1.PSKQ19.1	DREB-III	transcript:KRH47897	0.224861	0.800965	0.280737	471	112.417	358.583	69.6667	55.3333	0.194283	0.492216		49.3205
AhDREB-9	arahy.Tifrunner.gnm1.ann1.PSKQ19.1	DREB-III	transcript:KRH68923	0.188724	1.25318	0.150596	492	117.417	374.583	62.5	71.5	0.166852	0.608943		77.1662
AhDREB-9	arahy.Tifrunner.gnm1.ann1.PSKQ19.1	DREB-III	transcript:KRG97200	0.180644	1.58703	0.113825	492	118.25	373.75	60	78	0.160535	0.659619		97.7237
AhDREB-23	arahy.Tifrunner.gnm1.ann1.X9M6WH.1	DREB-III	transcript:KRH06455	0.285264	1.39915	0.203884	546	134.75	411.25	97.5833	85.4167	0.237285	0.63389		86.1546
AhDREB-23	arahy.Tifrunner.gnm1.ann1.X9M6WH.1	DREB-III	transcript:KRH47897	0.196136	1.15716	0.169497	528	129.167	398.833	68.8333	76.1667	0.172587	0.589677		71.2539
AhDREB-23	arahy.Tifrunner.gnm1.ann1.X9M6WH.1	DREB-III	transcript:KRH68923	0.247654	1.39698	0.177278	519	126.667	392.333	82.75	80.25	0.210918	0.633553		86.0207
AhDREB-38	arahy.Tifrunner.gnm1.ann1.GS7VU5.1	DREB-III	transcript:KRH30499	0.335267	1.82399	0.18381	681	164.083	516.917	139.75	112.25	0.270353	0.684104		112.315
AhDREB-38	arahy.Tifrunner.gnm1.ann1.GS7VU5.1	DREB-III	transcript:KRH22718	0.39292	1.16316	0.337804	684	167.667	516.333	157.917	99.0833	0.305842	0.590954		71.6232
AhDREB-38	arahy.Tifrunner.gnm1.ann1.GS7VU5.1	DREB-III	transcript:KRH25177	0.341406	2.15749	0.158242	660	156.833	503.167	138	111	0.274263	0.707758		132.85
AhDREB-38	arahy.Tifrunner.gnm1.ann1.GS7VU5.1	DREB-III	transcript:KRH26586	0.444729	2.03589	0.218445	645	155.167	489.833	164.333	108.667	0.335488	0.700322		125.362
AhDREB-19	arahy.Tifrunner.gnm1.ann1.X2S259.1	DREB-III	transcript:KRH47233	0.188768	1.67219	0.112887	579	136.083	442.917	73.9167	91.0833	0.166886	0.66932		102.967
AhDREB-19	arahy.Tifrunner.gnm1.ann1.X2S259.1	DREB-III	transcript:KRH44298	0.235654	1.46208	0.161177	660	157.667	502.333	101.583	101.417	0.202223	0.643235		90.0296
AhDREB-41	arahy.Tifrunner.gnm1.ann1.YAEJ5M.1	DREB-III	transcript:KRH44298	0.231801	1.46418	0.158315	660	158.5	501.5	100	102	0.199402	0.643533		90.1588
AhDREB-37	arahy.Tifrunner.gnm1.ann1.9V08HM.1	DREB-III	transcript:KRH23417	0.204282	1.20385	0.169691	564	128.75	435.25	77.8333	77.1667	0.178824	0.599353		74.1286
AhDREB-37	arahy.Tifrunner.gnm1.ann1.9V08HM.1	DREB-III	transcript:KRH47233	0.272901	1.7084	0.15974	585	137.667	447.333	102.333	92.6667	0.228763	0.673123		105.197
AhDREB-37	arahy.Tifrunner.gnm1.ann1.9V08HM.1	DREB-III	transcript:KRH09916	0.19087	1.35064	0.141318	564	128.833	435.167	73.3333	80.6667	0.168518	0.626132		83.1676
AhDREB-37	arahy.Tifrunner.gnm1.ann1.9V08HM.1	DREB-III	transcript:KRH44298	0.268184	1.57222	0.170576	594	141.25	452.75	102.083	92.9167	0.225474	0.657817		96.8118
AhDREB-29	arahy.Tifrunner.gnm1.ann1.452FBF.1	DREB-III	transcript:KRH28146	0.410799	1.03644	0.396355	567	133.083	433.917	137.25	74.75	0.316305	0.561678		63.8202
AhDREB-29	arahy.Tifrunner.gnm1.ann1.452FBF.1	DREB-III	transcript:KRH57459	0.372582	1.54782	0.240714	642	156.417	485.583	142.583	102.417	0.293633	0.654768		95.3091
AhDREB-29	arahy.Tifrunner.gnm1.ann1.452FBF.1	DREB-III	transcript:KRH04169	0.33015	1.25745	0.262555	639	155.667	483.333	129.083	94.9167	0.267069	0.609743		77.4291
AhDREB-5	arahy.Tifrunner.gnm1.ann1.FAI7YU.1	DREB-III	transcript:KRH28146	0.410799	1.03644	0.396355	567	133.083	433.917	137.25	74.75	0.316305	0.561678		63.8202
AhDREB-5	arahy.Tifrunner.gnm1.ann1.FAI7YU.1	DREB-III	transcript:KRH57459	0.372582	1.54782	0.240714	642	156.417	485.583	142.583	102.417	0.293633	0.654768		95.3091
AhDREB-5	arahy.Tifrunner.gnm1.ann1.FAI7YU.1	DREB-III	transcript:KRH04169	0.33015	1.25745	0.262555	639	155.667	483.333	129.083	94.9167	0.267069	0.609743		77.4291
AhDREB-30	arahy.Tifrunner.gnm1.ann1.47NS3A.1	DREB-II	transcript:KRH77034	0.11677	0.743707	0.157011	468	116.583	351.417	38	55	0.108134	0.471766		45.7948
AhDREB-30	arahy.Tifrunner.gnm1.ann1.47NS3A.1	DREB-II	transcript:KRH04555	0.139801	0.932598	0.149905	426	102.583	323.417	41.25	54.75	0.127544	0.533712		57.426
AhDREB-30	arahy.Tifrunner.gnm1.ann1.47NS3A.1	DREB-II	transcript:KRH28439	0.100974	0.681087	0.148254	474	116.75	357.25	33.75	52.25	0.0944717	0.447537		41.9388
AhDREB-6	arahy.Tifrunner.gnm1.ann1.VJ8B3Q.1	DREB-II	transcript:KRH77034	0.119917	0.772969	0.155139	468	116.083	351.917	39	56	0.110822	0.482412		47.5966
AhDREB-6	arahy.Tifrunner.gnm1.ann1.VJ8B3Q.1	DREB-II	transcript:KRH04555	0.1426	0.976089	0.146093	426	102.583	323.417	42	56	0.129863	0.545898		60.104
AhDREB-6	arahy.Tifrunner.gnm1.ann1.VJ8B3Q.1	DREB-II	transcript:KRH28439	0.11716	0.724815	0.161641	474	116.75	357.25	38.75	54.25	0.108467	0.464668		44.6315
AhDREB-8	arahy.Tifrunner.gnm1.ann1.JE3RIW.1	DREB-II	transcript:KRH27803	0.303021	0.865928	0.349937	528	122.5	405.5	101.083	62.9167	0.249281	0.513605		53.3207
AhDREB-33	arahy.Tifrunner.gnm1.ann1.WP3ECB.1	DREB-I	transcript:KRG95297	0.126334	0.614662	0.205535	837	186.917	650.083	75.5833	78.4167	0.116267	0.419527		37.8487
AhDREB-33	arahy.Tifrunner.gnm1.ann1.WP3ECB.1	DREB-I	transcript:KRH66977	0.138037	0.643063	0.214655	831	183.917	647.083	81.5833	79.4167	0.126079	0.431808		39.5975
AhDREB-13	arahy.Tifrunner.gnm1.ann1.XJX19T.1	DREB-I	transcript:KRH14926	0.474492	1.46601	0.323663	909	210.083	698.917	245.75	135.25	0.351616	0.643792		90.2713
AhDREB-13	arahy.Tifrunner.gnm1.ann1.XJX19T.1	DREB-I	transcript:KRH73281	0.431274	1.13086	0.381367	966	223.333	742.667	243.583	130.417	0.327985	0.583955		69.6343
AhDREB-20	arahy.Tifrunner.gnm1.ann1.17GHQZ.1	DREB-I	transcript:KRH34596	0.247673	0.771323	0.321101	1077	243	834	175.917	117.083	0.210931	0.481824		47.4953
AhDREB-20	arahy.Tifrunner.gnm1.ann1.17GHQZ.1	DREB-I	transcript:KRG92191	0.244584	0.801972	0.304978	1083	246.5	836.5	174.583	121.417	0.208707	0.492563		49.3825
AhDREB-27	arahy.Tifrunner.gnm1.ann1.KQL0FY.1	DREB-IV	transcript:KRH00328	0.279063	0.854576	0.326552	1017	216.667	800.333	186.5	110.5	0.233028	0.51		52.6217
AhDREB-27	arahy.Tifrunner.gnm1.ann1.KQL0FY.1	DREB-IV	transcript:KRH49463	0.295232	0.691495	0.426948	942	202.75	739.25	180.417	91.5833	0.244054	0.451706		42.5797
AhDREB-4	arahy.Tifrunner.gnm1.ann1.U8GE9Q.1	DREB-IV	transcript:KRH00328	0.276497	0.900809	0.306943	903	191.667	711.333	164.5	100.5	0.231256	0.524348		55.4685
AhDREB-4	arahy.Tifrunner.gnm1.ann1.U8GE9Q.1	DREB-IV	transcript:KRH49463	0.254096	0.825372	0.307856	819	177.167	641.833	138.333	88.6667	0.215528	0.50047		50.8234
AhDREB-25	arahy.Tifrunner.gnm1.ann1.KD4831.1	DREB-IV	transcript:KRH00328	0.433159	0.903793	0.479268	1398	290.5	1107.5	364.417	152.583	0.329044	0.525244		55.6523
AhDREB-25	arahy.Tifrunner.gnm1.ann1.KD4831.1	DREB-IV	transcript:KRH49463	0.461222	0.895924	0.514801	981	207.667	773.333	266.417	108.583	0.344504	0.522873		55.1677
AhDREB-3	arahy.Tifrunner.gnm1.ann1.SE8WTS.1	DREB-IV	transcript:KRH00328	0.41539	0.865414	0.47999	1395	288.25	1106.75	353	148	0.318952	0.513443		53.289
AhDREB-3	arahy.Tifrunner.gnm1.ann1.SE8WTS.1	DREB-IV	transcript:KRH49463	0.472738	0.812522	0.581815	981	206.083	774.917	271.75	102.25	0.350683	0.496159		50.0322
AhDREB-39	arahy.Tifrunner.gnm1.ann1.L5HMHT.1	DREB-IV	transcript:KRH26854	0.0838553	1.18494	0.0707677	501	118.667	382.333	30.3333	70.6667	0.0793374	0.595506		72.9641
AhDREB-39	arahy.Tifrunner.gnm1.ann1.L5HMHT.1	DREB-IV	transcript:KRH56072	0.163864	1.63734	0.100079	504	117.333	386.667	56.9167	78.0833	0.147198	0.665483		100.821
AhDREB-39	arahy.Tifrunner.gnm1.ann1.L5HMHT.1	DREB-IV	transcript:KRH22495	0.0749257	1.29033	0.0580669	504	119.5	384.5	27.4167	73.5833	0.0713047	0.61576		79.454
AhDREB-39	arahy.Tifrunner.gnm1.ann1.L5HMHT.1	DREB-IV	transcript:KRH25441	0.153096	1.51224	0.101238	504	117.667	386.333	53.5	76.5	0.138481	0.650142		93.1182
AhDREB-35	arahy.Tifrunner.gnm1.ann1.5KI8FH.1	DREB-IV	transcript:KRH14906	0.194009	0.888663	0.218315	1155	256.083	898.917	153.667	133.333	0.170947	0.520664		54.7206
AhDREB-35	arahy.Tifrunner.gnm1.ann1.5KI8FH.1	DREB-IV	transcript:KRH73245	0.17853	0.889755	0.200651	1152	254	898	142.667	132.333	0.158872	0.520997		54.7879
AhDREB-12	arahy.Tifrunner.gnm1.ann1.73DHZN.1	DREB-IV	transcript:KRH14906	0.197473	0.912113	0.216501	1155	255.5	899.5	156.167	134.833	0.173615	0.527723		56.1646
AhDREB-12	arahy.Tifrunner.gnm1.ann1.73DHZN.1	DREB-IV	transcript:KRH73245	0.181937	0.900217	0.202103	1152	253.417	898.583	145.167	132.833	0.161551	0.52417		55.4321
AhDREB-15	arahy.Tifrunner.gnm1.ann1.15RNTX.1	DREB-IV	transcript:KRH05892	0.326426	1.3276	0.245877	708	163.917	544.083	144	102	0.264665	0.622267		81.7488
AhDREB-15	arahy.Tifrunner.gnm1.ann1.15RNTX.1	DREB-IV	transcript:KRH51773	0.290161	0.989785	0.293156	705	163	542	130.417	89.5833	0.240621	0.549591		60.9473
AhDREB-15	arahy.Tifrunner.gnm1.ann1.15RNTX.1	DREB-IV	transcript:KRH61095	0.30346	0.913485	0.3322	702	164.417	537.583	134.167	86.8333	0.249574	0.52813		56.2491
AhDREB-32	arahy.Tifrunner.gnm1.ann1.301SU2.1	DREB-IV	transcript:KRH05892	0.483383	1.58006	0.305927	741	161.917	579.083	206.333	106.667	0.35631	0.658775		97.2943
AhDREB-32	arahy.Tifrunner.gnm1.ann1.301SU2.1	DREB-IV	transcript:KRH51773	0.421562	1.25479	0.335961	684	151.417	532.583	171.75	92.25	0.322485	0.609246		77.2657
AhDREB-32	arahy.Tifrunner.gnm1.ann1.301SU2.1	DREB-IV	transcript:KRH61095	0.370201	1.2547	0.295052	669	149.917	519.083	151.667	91.3333	0.292182	0.609227		77.2596
AhDREB-10	arahy.Tifrunner.gnm1.ann1.B20XFZ.1	DREB-IV	transcript:KRH05892	0.435441	1.39054	0.313146	735	162.833	572.167	189	103	0.330323	0.632549		85.6242
AhDREB-10	arahy.Tifrunner.gnm1.ann1.B20XFZ.1	DREB-IV	transcript:KRH51773	0.385465	1.36756	0.281863	663	147.083	515.917	155.5	92.5	0.301405	0.628895		84.2095
AhDREB-10	arahy.Tifrunner.gnm1.ann1.B20XFZ.1	DREB-IV	transcript:KRH61095	0.346105	1.12313	0.308161	648	145.417	502.583	139.333	84.6667	0.277234	0.582235		69.1583
AhDREB-14	arahy.Tifrunner.gnm1.ann1.8V3MXA.1	DREB-V	transcript:KRH09737	0.135752	0.958162	0.141679	522	118	404	50.1667	63.8333	0.124175	0.54096		59.0001
AhDREB-14	arahy.Tifrunner.gnm1.ann1.8V3MXA.1	DREB-V	transcript:KRH44444	0.116891	0.711152	0.164368	540	121.167	418.833	45.3333	55.6667	0.108237	0.459422		43.7901
AhDREB-14	arahy.Tifrunner.gnm1.ann1.8V3MXA.1	DREB-V	transcript:KRH47461	0.123708	0.865577	0.142919	534	120.417	413.583	47.1667	61.8333	0.114044	0.513495		53.2991
AhDREB-36	arahy.Tifrunner.gnm1.ann1.P2AB97.1	DREB-V	transcript:KRH09737	0.135752	0.958162	0.141679	522	118	404	50.1667	63.8333	0.124175	0.54096		59.0001
AhDREB-36	arahy.Tifrunner.gnm1.ann1.P2AB97.1	DREB-V	transcript:KRH44444	0.116891	0.711152	0.164368	540	121.167	418.833	45.3333	55.6667	0.108237	0.459422		43.7901
AhDREB-36	arahy.Tifrunner.gnm1.ann1.P2AB97.1	DREB-V	transcript:KRH47461	0.123708	0.865577	0.142919	534	120.417	413.583	47.1667	61.8333	0.114044	0.513495		53.2991
AhDREB-1	arahy.Tifrunner.gnm1.ann1.CSV6ZK.1	DREB-V	transcript:KRH03696	0.180564	1.48461	0.121624	684	154.833	529.167	84.9167	100.083	0.160472	0.646394		91.4168
AhDREB-16	arahy.Tifrunner.gnm1.ann1.3D7MPL.1	DREB-V	transcript:KRH05157	0.237873	1.1207	0.212253	591	131.083	459.917	93.75	76.25	0.203841	0.581691		69.0089
AhDREB-16	arahy.Tifrunner.gnm1.ann1.3D7MPL.1	DREB-V	transcript:KRH52445	0.158961	1.1649	0.136459	549	119.083	429.917	61.5833	70.4167	0.143245	0.591323		71.7303
AhDREB-16	arahy.Tifrunner.gnm1.ann1.3D7MPL.1	DREB-V	transcript:KRH61775	0.167463	1.20103	0.139432	570	123.583	446.417	67	74	0.150084	0.598786		73.9553
AhDREB-40	arahy.Tifrunner.gnm1.ann1.KDEH1Y.1	DREB-V	transcript:KRH61775	0.166822	1.5178	0.10991	570	123.167	446.833	66.8333	80.1667	0.149571	0.65088		93.4608
AhDREB-40	arahy.Tifrunner.gnm1.ann1.KDEH1Y.1	DREB-V	transcript:KRH52445	0.177872	1.82648	0.0973849	549	118	431	68.25	80.75	0.158353	0.684322		112.468
AhDREB-18	arahy.Tifrunner.gnm1.ann1.VHG0QP.1	DREB-V	transcript:KRH23632	0.193868	1.11686	0.173583	522	119.083	402.917	68.8333	69.1667	0.170838	0.580826		68.772
AhDREB-18	arahy.Tifrunner.gnm1.ann1.VHG0QP.1	DREB-V	transcript:KRH09667	0.223648	1.06104	0.210781	528	119.917	408.083	78.9167	68.0833	0.193384	0.567755		65.3351
AhDREB-18	arahy.Tifrunner.gnm1.ann1.VHG0QP.1	DREB-V	transcript:KRH44522	0.171826	0.937846	0.183213	558	126.583	431.417	66.25	67.75	0.153564	0.535221		57.7491
AhDREB-18	arahy.Tifrunner.gnm1.ann1.VHG0QP.1	DREB-V	transcript:KRH47384	0.193551	0.897588	0.215634	567	128.333	438.667	74.8333	67.1667	0.170593	0.523377		55.2702
AhDREB-21	arahy.Tifrunner.gnm1.ann1.MMJQ7K.1	DREB-V	transcript:KRH61698	0.319783	1.72485	0.185398	498	109.417	388.583	101.167	73.8333	0.260347	0.674791		106.21
AhDREB-21	arahy.Tifrunner.gnm1.ann1.MMJQ7K.1	DREB-V	transcript:KRH52366	0.322345	2.2676	0.142152	498	109.667	388.333	101.75	78.25	0.262017	0.713526		139.631
AhDREB-34	arahy.Tifrunner.gnm1.ann1.2YN4P9.1	DREB-V	transcript:KRH15790	0.219873	0.74186	0.296381	570	129.667	440.333	83.9167	61.0833	0.190575	0.47108		45.6811
AhDREB-34	arahy.Tifrunner.gnm1.ann1.2YN4P9.1	DREB-V	transcript:KRH61698	0.148119	1.03652	0.142899	552	123.583	428.417	57.5833	69.4167	0.13441	0.561699		63.8254
AhDREB-34	arahy.Tifrunner.gnm1.ann1.2YN4P9.1	DREB-V	transcript:KRH05257	0.247529	0.686582	0.360523	582	131	451	95.0833	58.9167	0.210828	0.449746		42.2772
AhDREB-34	arahy.Tifrunner.gnm1.ann1.2YN4P9.1	DREB-V	transcript:KRH52366	0.145471	0.981962	0.148144	552	122.833	429.167	56.75	67.25	0.132233	0.54749		60.4657
AhDREB-11	arahy.Tifrunner.gnm1.ann1.JRIM60.1	DREB-V	transcript:KRH15790	0.248196	0.814356	0.304776	573	129.333	443.667	93.75	64.25	0.211307	0.496778		50.1451
AhDREB-11	arahy.Tifrunner.gnm1.ann1.JRIM60.1	DREB-V	transcript:KRH61698	0.192227	0.936509	0.205259	561	125.583	435.417	73.8333	67.1667	0.169569	0.534837		57.6668
AhDREB-11	arahy.Tifrunner.gnm1.ann1.JRIM60.1	DREB-V	transcript:KRH05257	0.268651	0.760897	0.353071	591	133	458	103.417	63.5833	0.225801	0.47807		46.8533
AhDREB-11	arahy.Tifrunner.gnm1.ann1.JRIM60.1	DREB-V	transcript:KRH52366	0.171434	0.962833	0.178052	555	123.25	431.75	66.1667	66.8333	0.153252	0.542258		59.2878
AhERF-37	arahy.Tifrunner.gnm1.ann1.Y7XFN8.1	ERF-VI	transcript:KRH30664	0.305543	1.05676	0.289133	774	189.25	584.75	146.75	107.25	0.250962	0.566711		65.0712
AhERF-37	arahy.Tifrunner.gnm1.ann1.Y7XFN8.1	ERF-VI	transcript:KRH17205	0.379895	1.6023	0.237093	807	196.667	610.333	181.917	130.083	0.298061	0.661441		98.6638
AhERF-37	arahy.Tifrunner.gnm1.ann1.Y7XFN8.1	ERF-VI	transcript:KRH72836	0.370411	2.03783	0.181768	768	185	583	170.417	129.583	0.29231	0.70045		125.482
AhERF-37	arahy.Tifrunner.gnm1.ann1.Y7XFN8.1	ERF-VI	transcript:KRG98122	0.371549	1.08226	0.343308	675	168.75	506.25	148.333	96.6667	0.293004	0.57284		66.6418
AhERF-1	arahy.Tifrunner.gnm1.ann1.G0YQ1S.1	ERF-VI	transcript:KRH30664	0.29567	0.971521	0.304337	771	188.5	582.5	142.333	102.667	0.244349	0.544651		59.8227
AhERF-1	arahy.Tifrunner.gnm1.ann1.G0YQ1S.1	ERF-VI	transcript:KRH17205	0.377947	1.63126	0.23169	795	192.917	602.083	178.75	128.25	0.296886	0.664795		100.447
AhERF-1	arahy.Tifrunner.gnm1.ann1.G0YQ1S.1	ERF-VI	transcript:KRH72836	0.369279	2.05991	0.179269	768	185.333	582.667	169.917	130.083	0.291619	0.701888		126.842
AhERF-1	arahy.Tifrunner.gnm1.ann1.G0YQ1S.1	ERF-VI	transcript:KRG98122	0.388538	1.08108	0.359397	675	168.25	506.75	153.667	96.3333	0.30324	0.572561		66.5692
AhERF-17	arahy.Tifrunner.gnm1.ann1.3WAX0M.1	ERF-VI	transcript:KRG97126	0.495024	1.05317	0.470034	819	182.917	636.083	230.5	103.5	0.362374	0.565831		64.8501
AhERF-17	arahy.Tifrunner.gnm1.ann1.3WAX0M.1	ERF-VI	transcript:KRH68876	0.481147	1.00891	0.476898	816	181.5	634.5	225.333	100.667	0.355135	0.554637		62.1251
AhERF-57	arahy.Tifrunner.gnm1.ann1.J6K2KY.1	ERF-VI	transcript:KRG97126	0.475647	0.963448	0.493693	804	177.75	626.25	220.583	96.4167	0.352229	0.542429		59.3256
AhERF-57	arahy.Tifrunner.gnm1.ann1.J6K2KY.1	ERF-VI	transcript:KRH68876	0.469279	0.929222	0.505024	804	176.917	627.083	218.75	94.25	0.348837	0.532737		57.2181
AhERF-52	arahy.Tifrunner.gnm1.ann1.N4EN9H.1	ERF-VI	transcript:KRH77624	0.250408	0.843175	0.296982	822	197.667	624.333	132.917	100.083	0.212894	0.506324		51.9196
AhERF-52	arahy.Tifrunner.gnm1.ann1.N4EN9H.1	ERF-VI	transcript:KRH27859	0.199527	1.08747	0.183478	783	185.083	597.917	104.75	106.25	0.175192	0.574066		66.9626
AhERF-52	arahy.Tifrunner.gnm1.ann1.N4EN9H.1	ERF-VI	transcript:KRH41287	0.30884	1.15764	0.266785	786	184.25	601.75	152.333	108.667	0.253151	0.589778		71.283
AhERF-52	arahy.Tifrunner.gnm1.ann1.N4EN9H.1	ERF-VI	transcript:KRH60010	0.389338	1.6171	0.240763	858	198.667	659.333	200.25	131.75	0.303716	0.663171		99.5752
AhERF-25	arahy.Tifrunner.gnm1.ann1.Q66BD2.1	ERF-VI	transcript:KRH18134	0.394074	2.21318	0.178058	993	224.167	768.833	235.667	159.333	0.306525	0.710781		136.279
AhERF-25	arahy.Tifrunner.gnm1.ann1.Q66BD2.1	ERF-VI	transcript:KRH53432	0.256481	1.53898	0.166657	1020	232.417	787.583	171.083	151.917	0.217226	0.653639		94.7648
AhERF-25	arahy.Tifrunner.gnm1.ann1.Q66BD2.1	ERF-VI	transcript:KRH64510	0.222888	1.22701	0.181651	924	216.083	707.917	136.5	130.5	0.192819	0.603934		75.5548
AhERF-7	arahy.Tifrunner.gnm1.ann1.WBA6PF.1	ERF-VIII	transcript:KRH74517	0.390243	1.05199	0.370958	945	212.333	732.667	222.917	120.083	0.304254	0.565542		64.7775
AhERF-7	arahy.Tifrunner.gnm1.ann1.WBA6PF.1	ERF-VIII	transcript:KRH69639	0.530924	1.47873	0.359041	1056	238.417	817.583	311.083	153.917	0.380491	0.645578		91.0547
AhERF-7	arahy.Tifrunner.gnm1.ann1.WBA6PF.1	ERF-VIII	transcript:KRG99434	0.420283	1.29258	0.32515	963	214.5	748.5	240.833	132.167	0.321755	0.616162		79.5924
AhERF-7	arahy.Tifrunner.gnm1.ann1.WBA6PF.1	ERF-VIII	transcript:KRH45585	0.480571	1.22176	0.393344	975	217.833	757.167	268.667	131.333	0.354832	0.602907		75.2314
AhERF-44	arahy.Tifrunner.gnm1.ann1.8UYF3G.1	ERF-VIII	transcript:KRH74517	0.350883	1.06944	0.328099	978	217.333	760.667	213.167	123.833	0.280237	0.569785		65.8524
AhERF-44	arahy.Tifrunner.gnm1.ann1.8UYF3G.1	ERF-VIII	transcript:KRH69639	0.468222	1.42468	0.32865	1080	241.333	838.667	292.083	153.917	0.348271	0.637776		87.7268
AhERF-44	arahy.Tifrunner.gnm1.ann1.8UYF3G.1	ERF-VIII	transcript:KRG99434	0.408676	1.26536	0.322973	1011	224.417	786.583	247.833	137.167	0.315076	0.611214		77.916
AhERF-44	arahy.Tifrunner.gnm1.ann1.8UYF3G.1	ERF-VIII	transcript:KRH45585	0.474491	1.13576	0.417773	1023	228.333	794.667	279.417	133.583	0.351615	0.585036		69.9361
AhERF-21	arahy.Tifrunner.gnm1.ann1.2RQ41J.1	ERF-VIII	transcript:KRH06790	0.327517	1.23401	0.26541	687	163.833	523.167	138.833	99.1667	0.265371	0.60529		75.9856
AhERF-21	arahy.Tifrunner.gnm1.ann1.2RQ41J.1	ERF-VIII	transcript:KRH70088	0.304696	1.06997	0.28477	756	180.583	575.417	144.083	102.917	0.250398	0.569912		65.885
AhERF-21	arahy.Tifrunner.gnm1.ann1.2RQ41J.1	ERF-VIII	transcript:KRH08427	0.326429	0.998352	0.326968	756	180.75	575.25	152.25	99.75	0.264668	0.551867		61.4749
AhERF-59	arahy.Tifrunner.gnm1.ann1.K3BVMJ.1	ERF-VIII	transcript:KRH06790	0.341508	1.18199	0.288926	684	163.333	520.667	142.833	97.1667	0.274328	0.594898		72.7828
AhERF-59	arahy.Tifrunner.gnm1.ann1.K3BVMJ.1	ERF-VIII	transcript:KRH70088	0.292464	1.20059	0.2436	744	179	565	136.833	107.167	0.242183	0.598696		73.9279
AhERF-59	arahy.Tifrunner.gnm1.ann1.K3BVMJ.1	ERF-VIII	transcript:KRH08427	0.316387	1.05221	0.300688	756	181.667	574.333	148.25	102.75	0.258125	0.565596		64.7912
AhERF-30	arahy.Tifrunner.gnm1.ann1.C5BSUS.1	ERF-VIII	transcript:KRH21045	0.409057	1.00942	0.405239	933	212.25	720.75	227.25	117.75	0.315297	0.55477		62.1565
AhERF-30	arahy.Tifrunner.gnm1.ann1.C5BSUS.1	ERF-VIII	transcript:KRH11206	0.422347	1.02134	0.413522	903	206	697	225.083	114.917	0.322932	0.557848		62.8904
AhERF-70	arahy.Tifrunner.gnm1.ann1.ZQ3898.1	ERF-VIII	transcript:KRH21045	0.419726	0.89785	0.467479	930	213.167	716.833	230.417	111.583	0.321437	0.523456		55.2863
AhERF-70	arahy.Tifrunner.gnm1.ann1.ZQ3898.1	ERF-VIII	transcript:KRH11206	0.391156	0.860872	0.454372	891	204.75	686.25	209.167	104.833	0.304797	0.512007		53.0094
AhERF-64	arahy.Tifrunner.gnm1.ann1.WPAQ8S.1	ERF-VIII	transcript:KRH47397	0.393737	1.10152	0.357448	609	149.25	459.75	140.833	86.1667	0.306326	0.577331		67.8278
AhERF-64	arahy.Tifrunner.gnm1.ann1.WPAQ8S.1	ERF-VIII	transcript:KRH44513	0.401313	1.11861	0.35876	582	144.667	437.333	135.917	84.0833	0.310785	0.581221		68.8801
AhERF-74	arahy.Tifrunner.gnm1.ann1.57AKVM.1	ERF-VIII	transcript:KRH21385	0.143773	0.89051	0.16145	483	127.583	355.417	46.5	66.5	0.130832	0.521228		54.8344
AhERF-74	arahy.Tifrunner.gnm1.ann1.57AKVM.1	ERF-VIII	transcript:KRH10926	0.17162	1.19652	0.143432	507	133.25	373.75	57.3333	79.6667	0.1534	0.597874		73.6774
AhERF-34	arahy.Tifrunner.gnm1.ann1.ILN3K9.1	ERF-VIII	transcript:KRH21385	0.153827	0.897264	0.17144	483	127.083	355.917	49.5	66.5	0.139077	0.523279		55.2502
AhERF-34	arahy.Tifrunner.gnm1.ann1.ILN3K9.1	ERF-VIII	transcript:KRH10926	0.16626	1.15664	0.143743	507	132.583	374.417	55.8333	78.1667	0.149121	0.589566		71.2219
AhERF-43	arahy.Tifrunner.gnm1.ann1.4AG551.1	ERF-VIII	transcript:KRH21385	0.231362	1.39657	0.165664	468	123.917	344.083	68.5	78.5	0.19908	0.63349		85.9959
AhERF-43	arahy.Tifrunner.gnm1.ann1.4AG551.1	ERF-VIII	transcript:KRH10926	0.240728	1.18341	0.203418	486	128.25	357.75	73.6667	76.3333	0.205917	0.595192		72.8703
AhERF-40	arahy.Tifrunner.gnm1.ann1.HGAZ7D.1	ERF-VIII	transcript:KRH25634	0.216599	1.15508	0.187518	594	137.75	456.25	85.8333	81.1667	0.188128	0.589232		71.1257
AhERF-40	arahy.Tifrunner.gnm1.ann1.HGAZ7D.1	ERF-VIII	transcript:KRH55920	0.215971	1.40547	0.153664	606	141.5	464.5	87.1667	89.8333	0.187657	0.634865		86.5439
AhERF-65	arahy.Tifrunner.gnm1.ann1.L00VS1.1	ERF-VIII	transcript:KRH25634	0.506372	1.5814	0.320204	582	136.583	445.417	164	90	0.368195	0.658938		97.377
AhERF-65	arahy.Tifrunner.gnm1.ann1.L00VS1.1	ERF-VIII	transcript:KRH55920	0.369086	1.72955	0.2134	576	135.75	440.25	128.333	91.6667	0.291501	0.675261		106.5
AhERF-73	arahy.Tifrunner.gnm1.ann1.AS0C7C.1	ERF-VIII	transcript:KRH21384	0.175306	0.998369	0.175592	642	155.833	486.167	76	86	0.156325	0.551872		61.4759
AhERF-73	arahy.Tifrunner.gnm1.ann1.AS0C7C.1	ERF-VIII	transcript:KRH10927	0.192959	1.00901	0.191236	636	155.5	480.5	81.75	86.25	0.170135	0.554662		62.131
AhERF-33	arahy.Tifrunner.gnm1.ann1.QGFJ76.1	ERF-VIII	transcript:KRH21384	0.172712	0.974462	0.177238	642	155.833	486.167	75	85	0.154268	0.545455		60.0038
AhERF-33	arahy.Tifrunner.gnm1.ann1.QGFJ76.1	ERF-VIII	transcript:KRH10927	0.190272	0.984714	0.193225	636	155.5	480.5	80.75	85.25	0.168054	0.548232		60.6351
AhERF-62	arahy.Tifrunner.gnm1.ann1.8ZPK8F.1	ERF-VIII	transcript:KRH14334	0.18007	1.21847	0.147783	639	162.167	476.833	76.3333	97.6667	0.160084	0.602261		75.0289
AhERF-62	arahy.Tifrunner.gnm1.ann1.8ZPK8F.1	ERF-VIII	transcript:KRH73797	0.172941	1.51098	0.114456	627	159.75	467.25	72.1667	103.833	0.15445	0.649974		93.0407
AhERF-23	arahy.Tifrunner.gnm1.ann1.JEZR1W.1	ERF-VIII	transcript:KRH14334	0.176662	1.25471	0.140799	639	162.5	476.5	75	99	0.157398	0.609231		77.2607
AhERF-23	arahy.Tifrunner.gnm1.ann1.JEZR1W.1	ERF-VIII	transcript:KRH73797	0.174289	1.53482	0.113557	627	159.75	467.25	72.6667	104.333	0.15552	0.653104		94.5089
AhERF-23	arahy.Tifrunner.gnm1.ann1.JEZR1W.1	ERF-VIII	transcript:KRH46237	0.184642	1.6163	0.114238	609	154.833	454.167	74.3333	102.667	0.16367	0.663079		99.526
AhERF-24	arahy.Tifrunner.gnm1.ann1.DY3CW6.1	ERF-VIII	transcript:KRH14811	0.242018	1.19242	0.202963	594	146.417	447.583	92.5833	87.4167	0.206852	0.59704		73.4252
AhERF-24	arahy.Tifrunner.gnm1.ann1.DY3CW6.1	ERF-VIII	transcript:KRH73332	0.198791	1.2408	0.160212	588	146.583	441.417	77.0833	88.9167	0.174627	0.606595		76.4038
AhERF-63	arahy.Tifrunner.gnm1.ann1.RX34PI.1	ERF-VIII	transcript:KRH14811	0.242071	1.22492	0.197622	594	146.5	447.5	92.5833	88.4167	0.20689	0.603527		75.4263
AhERF-63	arahy.Tifrunner.gnm1.ann1.RX34PI.1	ERF-VIII	transcript:KRH73332	0.198834	1.27544	0.155894	588	146.667	441.333	77.0833	89.9167	0.17466	0.613068		78.5371
AhERF-28	arahy.Tifrunner.gnm1.ann1.J0DG7J.1	ERF-VI-L	transcript:KRH35958	0.280702	1.30283	0.215456	972	222.5	749.5	175.5	137.5	0.234156	0.617978		80.2233
AhERF-28	arahy.Tifrunner.gnm1.ann1.J0DG7J.1	ERF-VI-L	transcript:KRG90812	0.259896	1.1549	0.225037	987	225.167	761.833	167.333	132.667	0.219646	0.589193		71.1147
AhERF-69	arahy.Tifrunner.gnm1.ann1.VG3SGX.1	ERF-VI-L	transcript:KRH35958	0.283464	1.34777	0.210321	972	222.167	749.833	177	139	0.236052	0.625656		82.9907
AhERF-69	arahy.Tifrunner.gnm1.ann1.VG3SGX.1	ERF-VI-L	transcript:KRG90812	0.259586	1.15836	0.224098	987	225.167	761.833	167.167	132.833	0.219427	0.589933		71.3277
AhERF-11	arahy.Tifrunner.gnm1.ann1.5I2TXN.1	ERF-X	transcript:KRH01504	0.28111	0.733154	0.383425	675	148.917	526.083	123.333	69.6667	0.234437	0.467823		45.145
AhERF-49	arahy.Tifrunner.gnm1.ann1.ARVN7W.1	ERF-X	transcript:KRH01504	0.28111	0.733154	0.383425	675	148.917	526.083	123.333	69.6667	0.234437	0.467823		45.145
AhERF-22	arahy.Tifrunner.gnm1.ann1.E9BLTS.1	ERF-X	transcript:KRH06817	0.434452	1.29802	0.334704	711	165.417	545.583	179.917	102.083	0.329769	0.617128		79.9272
AhERF-22	arahy.Tifrunner.gnm1.ann1.E9BLTS.1	ERF-X	transcript:KRH08410	0.451584	1.23336	0.36614	669	158.083	510.917	173.333	95.6667	0.33926	0.605166		75.9461
AhERF-22	arahy.Tifrunner.gnm1.ann1.E9BLTS.1	ERF-X	transcript:KRH70063	0.41939	1.24848	0.335919	654	153.083	500.917	160.917	93.0833	0.321244	0.608057		76.8771
AhERF-22	arahy.Tifrunner.gnm1.ann1.E9BLTS.1	ERF-X	transcript:KRG94719	0.539007	1.30768	0.412187	867	199.167	667.833	256.75	123.25	0.384452	0.618828		80.5219
AhERF-60	arahy.Tifrunner.gnm1.ann1.I2ZHTU.1	ERF-X	transcript:KRH06817	0.39382	1.319	0.298576	711	165.917	545.083	167	103	0.306375	0.620794		81.219
AhERF-60	arahy.Tifrunner.gnm1.ann1.I2ZHTU.1	ERF-X	transcript:KRH08410	0.439087	1.24024	0.354032	672	159.25	512.75	170.417	96.5833	0.332358	0.606489		76.3698
AhERF-60	arahy.Tifrunner.gnm1.ann1.I2ZHTU.1	ERF-X	transcript:KRH70063	0.394459	1.42755	0.276318	657	152.25	504.75	154.833	97.1667	0.306753	0.638205		87.9035
AhERF-60	arahy.Tifrunner.gnm1.ann1.I2ZHTU.1	ERF-X	transcript:KRG94719	0.470678	1.28323	0.366792	888	206	682	238.417	126.583	0.349585	0.614482		79.0165
AhERF-26	arahy.Tifrunner.gnm1.ann1.2Q12N5.1	ERF-X	transcript:KRH63877	0.426839	1.53626	0.277843	576	126.667	449.333	146.25	82.75	0.325482	0.653289		94.5975
AhERF-26	arahy.Tifrunner.gnm1.ann1.2Q12N5.1	ERF-X	transcript:KRH54084	0.317051	1.2875	0.246254	648	144.25	503.75	130.25	88.75	0.258561	0.615251		79.2793
AhERF-66	arahy.Tifrunner.gnm1.ann1.B66PX0.1	ERF-X	transcript:KRH63877	0.449577	1.54851	0.290329	576	127	449	151.833	83.1667	0.338159	0.654856		95.3515
AhERF-66	arahy.Tifrunner.gnm1.ann1.B66PX0.1	ERF-X	transcript:KRH54084	0.316677	1.21637	0.260346	648	144.417	503.583	130.083	86.9167	0.258315	0.601847		74.8995
AhERF-68	arahy.Tifrunner.gnm1.ann1.2Y0GDL.1	ERF-X	transcript:KRH08660	0.578498	1.52834	0.378515	1038	246.833	791.167	319	161	0.403202	0.652262		94.1094
AhERF-68	arahy.Tifrunner.gnm1.ann1.2Y0GDL.1	ERF-X	transcript:KRG91683	0.384253	1.27152	0.3022	783	194.333	588.667	177	119	0.30068	0.61235		78.2955
AhERF-29	arahy.Tifrunner.gnm1.ann1.P2THRP.1	ERF-X	transcript:KRG91683	0.415539	1.18656	0.350206	777	188.25	588.75	187.833	112.167	0.319038	0.595839		73.0638
AhERF-6	arahy.Tifrunner.gnm1.ann1.2AHI7R.1	ERF-X	transcript:KRH59504	0.38708	1.0005	0.386887	861	210.583	650.417	196.667	116.333	0.30237	0.552434		61.6071
AhERF-42	arahy.Tifrunner.gnm1.ann1.F2D5GR.1	ERF-X	transcript:KRH64120	0.355313	1.11698	0.318101	786	193.25	592.75	167.75	112.25	0.283003	0.580854		68.7797
AhERF-42	arahy.Tifrunner.gnm1.ann1.F2D5GR.1	ERF-X	transcript:KRH43369	0.402393	0.896227	0.448985	765	183.25	581.75	181.167	95.8333	0.311417	0.522965		55.1864
AhERF-42	arahy.Tifrunner.gnm1.ann1.F2D5GR.1	ERF-X	transcript:KRH53825	0.357445	0.891975	0.400734	876	223	653	185.667	116.333	0.284329	0.521674		54.9245
AhERF-42	arahy.Tifrunner.gnm1.ann1.F2D5GR.1	ERF-X	transcript:KRH59504	0.379146	0.905326	0.418795	849	207.5	641.5	190.917	109.083	0.29761	0.525703		55.7467
AhERF-35	arahy.Tifrunner.gnm1.ann1.768P1R.1	ERF-X	transcript:KRH64120	0.332518	0.939144	0.354065	786	194.333	591.667	158.917	104.083	0.268592	0.535592		57.829
AhERF-35	arahy.Tifrunner.gnm1.ann1.768P1R.1	ERF-X	transcript:KRH53825	0.328806	0.904198	0.363644	852	216.833	635.167	169.083	113.917	0.266203	0.525365		55.6772
AhERF-35	arahy.Tifrunner.gnm1.ann1.768P1R.1	ERF-X	transcript:KRH59504	0.459048	1.37283	0.334382	909	219.667	689.333	236.667	138.333	0.343327	0.629742		84.5336
AhERF-76	arahy.Tifrunner.gnm1.ann1.EZ5RGK.1	ERF-X	transcript:KRH64120	0.303466	0.909884	0.333521	786	194	592	147.75	102.25	0.249578	0.527062		56.0273
AhERF-76	arahy.Tifrunner.gnm1.ann1.EZ5RGK.1	ERF-X	transcript:KRH53825	0.321296	0.921658	0.348606	858	218.333	639.667	167.167	115.833	0.261334	0.530534		56.7523
AhERF-76	arahy.Tifrunner.gnm1.ann1.EZ5RGK.1	ERF-X	transcript:KRH59504	0.454391	1.28629	0.353258	912	219.5	692.5	236	135	0.340794	0.615034		79.205
AhERF-55	arahy.Tifrunner.gnm1.ann1.GIJ59W.1	ERF-VII	transcript:KRH32179	0.215298	0.880402	0.244546	348	78.1667	269.833	50.5	40.5	0.187153	0.518124		54.2119
AhERF-55	arahy.Tifrunner.gnm1.ann1.GIJ59W.1	ERF-VII	transcript:KRH67370	0.253237	0.678386	0.373294	357	83.25	273.75	58.8333	37.1667	0.214916	0.446446		41.7726
AhERF-46	arahy.Tifrunner.gnm1.ann1.ER44IM.1	ERF-VII	transcript:KRH37061	0.296397	1.02022	0.290523	702	157.083	544.917	133.417	87.5833	0.244839	0.55756		62.8211
AhERF-56	arahy.Tifrunner.gnm1.ann1.DRB5KP.1	ERF-VII	transcript:KRG96472	0.21639	1.28605	0.16826	561	130.083	430.917	81	80	0.187971	0.61499		79.19
AhERF-20	arahy.Tifrunner.gnm1.ann1.GP7L65.1	ERF-VII	transcript:KRH31850	0.266477	1.63891	0.162593	846	193.167	652.833	146.417	128.583	0.224279	0.66566		100.918
AhERF-20	arahy.Tifrunner.gnm1.ann1.GP7L65.1	ERF-VII	transcript:KRG96472	0.200737	1.16665	0.172062	561	130.417	430.583	75.8333	77.1667	0.176118	0.591693		71.8383
AhERF-20	arahy.Tifrunner.gnm1.ann1.GP7L65.1	ERF-VII	transcript:KRH69270	0.242611	1.67189	0.145112	834	190.75	643.25	133.333	127.667	0.207281	0.669288		102.949
AhERF-4	arahy.Tifrunner.gnm1.ann1.VF7WU9.1	ERF-VII	transcript:KRH06264	0.204116	1.00018	0.20408	1098	248.333	849.667	151.833	137.167	0.178698	0.552349		61.5873
AhERF-4	arahy.Tifrunner.gnm1.ann1.VF7WU9.1	ERF-VII	transcript:KRH47694	0.214164	0.879237	0.24358	1122	253.333	868.667	161.833	131.167	0.186301	0.517763		54.1402
AhERF-67	arahy.Tifrunner.gnm1.ann1.87AL67.1	ERF-IX	transcript:KRH34607	0.426428	1.42116	0.300056	546	119.917	426.083	138.583	76.4167	0.325249	0.637248		87.51
AhERF-67	arahy.Tifrunner.gnm1.ann1.87AL67.1	ERF-IX	transcript:KRG92180	0.289444	1.24644	0.232217	510	113	397	95.3333	68.6667	0.240134	0.60767		76.7513
AhERF-27	arahy.Tifrunner.gnm1.ann1.KF0N62.1	ERF-IX	transcript:KRH34607	0.47245	1.39192	0.339424	555	122.083	432.917	151.75	77.25	0.350529	0.632765		85.7091
AhERF-27	arahy.Tifrunner.gnm1.ann1.KF0N62.1	ERF-IX	transcript:KRG92180	0.367182	1.04586	0.351082	528	115.833	412.167	119.667	65.3333	0.290336	0.564029		64.4003
AhERF-50	arahy.Tifrunner.gnm1.ann1.FU6CIC.1	ERF-IX	transcript:KRH77324	0.224513	1.13328	0.198109	732	174.083	557.917	108.25	101.75	0.194025	0.58449		69.7834
AhERF-50	arahy.Tifrunner.gnm1.ann1.FU6CIC.1	ERF-IX	transcript:KRH57483	0.251102	0.91533	0.274329	738	172.917	565.083	120.583	91.4167	0.21339	0.528675		56.3627
AhERF-50	arahy.Tifrunner.gnm1.ann1.FU6CIC.1	ERF-IX	transcript:KRH04191	0.265085	1.06499	0.248909	741	175.25	565.75	126.333	99.6667	0.223302	0.568711		65.578
AhERF-50	arahy.Tifrunner.gnm1.ann1.FU6CIC.1	ERF-IX	transcript:KRH28164	0.237205	1.23726	0.191718	741	174.667	566.333	115.167	105.833	0.203355	0.605916		76.1858
AhERF-12	arahy.Tifrunner.gnm1.ann1.JGE7BU.1	ERF-IX	transcript:KRH77324	0.224513	1.13328	0.198109	732	174.083	557.917	108.25	101.75	0.194025	0.58449		69.7834
AhERF-12	arahy.Tifrunner.gnm1.ann1.JGE7BU.1	ERF-IX	transcript:KRH57483	0.251102	0.91533	0.274329	738	172.917	565.083	120.583	91.4167	0.21339	0.528675		56.3627
AhERF-12	arahy.Tifrunner.gnm1.ann1.JGE7BU.1	ERF-IX	transcript:KRH04191	0.265085	1.06499	0.248909	741	175.25	565.75	126.333	99.6667	0.223302	0.568711		65.578
AhERF-12	arahy.Tifrunner.gnm1.ann1.JGE7BU.1	ERF-IX	transcript:KRH28164	0.237205	1.23726	0.191718	741	174.667	566.333	115.167	105.833	0.203355	0.605916		76.1858
AhERF-51	arahy.Tifrunner.gnm1.ann1.4XS3FZ.1	ERF-IX	transcript:KRH77323	0.157629	1.06568	0.147913	804	200.833	603.167	85.75	114.25	0.142166	0.56888		65.6209
AhERF-51	arahy.Tifrunner.gnm1.ann1.4XS3FZ.1	ERF-IX	transcript:KRH57484	0.169305	1.14504	0.147859	744	184.25	559.75	84.8333	108.167	0.151556	0.587065		70.5074
AhERF-51	arahy.Tifrunner.gnm1.ann1.4XS3FZ.1	ERF-IX	transcript:KRH04192	0.166631	1.09214	0.152573	744	185.167	558.833	83.5	106.5	0.149418	0.575158		67.25
AhERF-51	arahy.Tifrunner.gnm1.ann1.4XS3FZ.1	ERF-IX	transcript:KRH28165	0.152448	1.33828	0.113913	714	180	534	73.6667	112.333	0.137953	0.624074		82.4067
AhERF-13	arahy.Tifrunner.gnm1.ann1.ZW7540.1	ERF-IX	transcript:KRH77323	0.157629	1.06568	0.147913	804	200.833	603.167	85.75	114.25	0.142166	0.56888		65.6209
AhERF-13	arahy.Tifrunner.gnm1.ann1.ZW7540.1	ERF-IX	transcript:KRH57484	0.169305	1.14504	0.147859	744	184.25	559.75	84.8333	108.167	0.151556	0.587065		70.5074
AhERF-13	arahy.Tifrunner.gnm1.ann1.ZW7540.1	ERF-IX	transcript:KRH04192	0.166631	1.09214	0.152573	744	185.167	558.833	83.5	106.5	0.149418	0.575158		67.25
AhERF-13	arahy.Tifrunner.gnm1.ann1.ZW7540.1	ERF-IX	transcript:KRH28165	0.152448	1.33828	0.113913	714	180	534	73.6667	112.333	0.137953	0.624074		82.4067
AhERF-47	arahy.Tifrunner.gnm1.ann1.BDR3J7.1	ERF-IX	transcript:KRH01076	0.251088	0.974018	0.257786	546	125	421	89.8333	68.1667	0.213381	0.545333		59.9765
AhERF-47	arahy.Tifrunner.gnm1.ann1.BDR3J7.1	ERF-IX	transcript:KRH40171	0.269803	1.04057	0.259284	537	122.917	414.083	93.8333	69.1667	0.226605	0.562712		64.0744
AhERF-48	arahy.Tifrunner.gnm1.ann1.C7A6P7.1	ERF-IX	transcript:KRH01077	0.279282	0.980127	0.284944	627	142.75	484.25	112.917	78.0833	0.233178	0.546994		60.3526
AhERF-71	arahy.Tifrunner.gnm1.ann1.EAK3RU.1	ERF-IX	transcript:KRH21337	0.23647	0.609408	0.388032	699	155	544	110.333	64.6667	0.202819	0.417204		37.5251
AhERF-71	arahy.Tifrunner.gnm1.ann1.EAK3RU.1	ERF-IX	transcript:KRH10962	0.703834	2.12148	0.331766	672	145.25	526.75	240.5	102.5	0.456573	0.70568		130.633
AhERF-31	arahy.Tifrunner.gnm1.ann1.T22KDW.1	ERF-IX	transcript:KRH21337	0.360293	0.979235	0.367934	765	169.333	595.667	170.417	92.5833	0.286094	0.546752		60.2977
AhERF-31	arahy.Tifrunner.gnm1.ann1.T22KDW.1	ERF-IX	transcript:KRH10962	0.819637	NaN	NaN	705	157.083	547.917	273.167	118.833	0.498555	0.756499	High Sequence Divergence Value (pS>=0.75)
AhERF-18	arahy.Tifrunner.gnm1.ann1.LF78J6.1	ERF-IX	transcript:KRG97053	0.404288	1.31995	0.306291	564	128.833	435.167	136	80	0.312524	0.620957		81.2776
Mean				0.247663	1.04057	0.240763	783	185.042	592.375	138.125	104.417	0.210924	0.564152		64.0744

## Sheet: Table S10
Supplementary Table S10. Cis-acting elements of AhAP2/ERF promoter
AP2/ERF members	Site Name	Organism	Position	Strand	Matrix score.	sequence	function
AhDREB-1	ABRE	Arabidopsis thaliana	55	-	5	ACGTG	cis-acting element involved in the abscisic acid responsiveness
AhDREB-1	ABRE	Arabidopsis thaliana	624	-	5	ACGTG	cis-acting element involved in the abscisic acid responsiveness
AhDREB-1	ARE	Zea mays	446	+	6	AAACCA	cis-acting regulatory element essential for the anaerobic induction
AhDREB-1	AT-rich element	Glycine max	152	+	10	ATAGAAATCAA	binding site of AT-rich DNA binding protein (ATBP-1)
AhDREB-1	CGTCA-motif	Hordeum vulgare	57	+	5	CGTCA	cis-acting regulatory element involved in the MeJA-responsiveness
AhDREB-1	G-box	Zea mays	55	+	6	CACGTC	cis-acting regulatory element involved in light responsiveness
AhDREB-1	G-box	Arabidopsis thaliana	624	-	6	TACGTG	cis-acting regulatory element involved in light responsiveness
AhDREB-1	LTR	Hordeum vulgare	213	-	6	CCGAAA	cis-acting element involved in low-temperature responsiveness
AhDREB-1	MRE	Petroselinum crispum	1123	+	7	AACCTAA	MYB binding site involved in light responsiveness
AhDREB-1	P-box	Oryza sativa	188	-	7	CCTTTTG	gibberellin-responsive element
AhDREB-1	TATC-box	Oryza sativa	1479	-	7	TATCCCA	cis-acting element involved in gibberellin-responsiveness
AhDREB-1	TCA-element	Nicotiana tabacum	899	-	9	CCATCTTTTT	cis-acting element involved in salicylic acid responsiveness
AhDREB-1	TCCC-motif	Spinacia oleracea	1390	-	7	TCTCCCT	part of a light responsive element
AhDREB-1	TGACG-motif	Hordeum vulgare	57	-	5	TGACG	cis-acting regulatory element involved in the MeJA-responsiveness
AhDREB-2	ARE	Zea mays	34	-	6	AAACCA	cis-acting regulatory element essential for the anaerobic induction
AhDREB-2	AT-rich element	Glycine max	689	+	10	ATAGAAATCAA	binding site of AT-rich DNA binding protein (ATBP-1)
AhDREB-2	Box 4	Petroselinum crispum	1143	-	6	ATTAAT	part of a conserved DNA module involved in light responsiveness
AhDREB-2	Box 4	Petroselinum crispum	1182	-	6	ATTAAT	part of a conserved DNA module involved in light responsiveness
AhDREB-2	Box 4	Petroselinum crispum	1042	-	6	ATTAAT	part of a conserved DNA module involved in light responsiveness
AhDREB-2	Box 4	Petroselinum crispum	1094	-	6	ATTAAT	part of a conserved DNA module involved in light responsiveness
AhDREB-2	Box 4	Petroselinum crispum	1156	-	6	ATTAAT	part of a conserved DNA module involved in light responsiveness
AhDREB-2	GATA-motif	Solanum tuberosum	1289	-	9	AAGGATAAGG	part of a light responsive element
AhDREB-2	GT1-motif	Avena sativa	904	+	7	GGTTAAT	light responsive element
AhDREB-2	LTR	Hordeum vulgare	377	-	6	CCGAAA	cis-acting element involved in low-temperature responsiveness
AhDREB-2	P-box	Oryza sativa	1423	+	7	CCTTTTG	gibberellin-responsive element
AhDREB-2	TCCC-motif	Spinacia oleracea	1396	+	7	TCTCCCT	part of a light responsive element
AhDREB-2	TCT-motif	Arabidopsis thaliana	101	-	6	TCTTAC	part of a light responsive element
AhDREB-3	ABRE	Arabidopsis thaliana	768	+	5	ACGTG	cis-acting element involved in the abscisic acid responsiveness
AhDREB-3	ABRE	Arabidopsis thaliana	949	+	5	ACGTG	cis-acting element involved in the abscisic acid responsiveness
AhDREB-3	ABRE	Arabidopsis thaliana	644	+	5	ACGTG	cis-acting element involved in the abscisic acid responsiveness
AhDREB-3	ABRE	Arabidopsis thaliana	1489	+	5	ACGTG	cis-acting element involved in the abscisic acid responsiveness
AhDREB-3	ABRE	Arabidopsis thaliana	767	-	6	CACGTG	cis-acting element involved in the abscisic acid responsiveness
AhDREB-3	ARE	Zea mays	802	+	6	AAACCA	cis-acting regulatory element essential for the anaerobic induction
AhDREB-3	AT1-motif	Solanum tuberosum	69	+	13	AATTATTTTTTATT	part of a light responsive module
AhDREB-3	ATCT-motif	Pisum sativum	612	-	9	AATCTAATCC	part of a conserved DNA module involved in light responsiveness
AhDREB-3	Box 4	Petroselinum crispum	1345	-	6	ATTAAT	part of a conserved DNA module involved in light responsiveness
AhDREB-3	Box 4	Petroselinum crispum	448	+	6	ATTAAT	part of a conserved DNA module involved in light responsiveness
AhDREB-3	Box 4	Petroselinum crispum	1092	-	6	ATTAAT	part of a conserved DNA module involved in light responsiveness
AhDREB-3	CGTCA-motif	Hordeum vulgare	117	+	5	CGTCA	cis-acting regulatory element involved in the MeJA-responsiveness
AhDREB-3	G-Box	Pisum sativum	767	-	6	CACGTG	cis-acting regulatory element involved in light responsiveness
AhDREB-3	G-Box	Pisum sativum	643	-	6	CACGTT	cis-acting regulatory element involved in light responsiveness
AhDREB-3	G-box	Arabidopsis thaliana	948	+	6	TACGTG	cis-acting regulatory element involved in light responsiveness
AhDREB-3	G-box	Brassica oleracea	545	+	9	TAACACGTAG	cis-acting regulatory element involved in light responsiveness
AhDREB-3	G-box	Arabidopsis thaliana	767	-	6	CACGTG	cis-acting regulatory element involved in light responsiveness
AhDREB-3	G-box	Arabidopsis thaliana	1488	+	6	TACGTG	cis-acting regulatory element involved in light responsiveness
AhDREB-3	GT1-motif	Arabidopsis thaliana	889	+	6	GGTTAA	light responsive element
AhDREB-3	TGACG-motif	Hordeum vulgare	117	-	5	TGACG	cis-acting regulatory element involved in the MeJA-responsiveness
AhDREB-4	ARE	Zea mays	20	+	6	AAACCA	cis-acting regulatory element essential for the anaerobic induction
AhDREB-4	Box 4	Petroselinum crispum	614	+	6	ATTAAT	part of a conserved DNA module involved in light responsiveness
AhDREB-4	GA-motif	Arabidopsis thaliana	755	-	8	ATAGATAA	part of a light responsive element
AhDREB-4	GATA-motif	Arabidopsis thaliana	751	-	10	AAGATAAGATT	part of a light responsive element
AhDREB-4	GATA-motif	Arabidopsis thaliana	738	-	10	AAGATAAGATT	part of a light responsive element
AhDREB-4	LTR	Hordeum vulgare	288	-	6	CCGAAA	cis-acting element involved in low-temperature responsiveness
AhDREB-4	TC-rich repeats	Nicotiana tabacum	134	+	9	ATTCTCTAAC	cis-acting element involved in defense and stress responsiveness
AhDREB-4	chs-CMA1a	Daucus carota	1125	-	8	TTACTTAA	part of a light responsive element
AhDREB-5	ARE	Zea mays	1170	-	6	AAACCA	cis-acting regulatory element essential for the anaerobic induction
AhDREB-5	ARE	Zea mays	518	-	6	AAACCA	cis-acting regulatory element essential for the anaerobic induction
AhDREB-5	Box 4	Petroselinum crispum	1322	-	6	ATTAAT	part of a conserved DNA module involved in light responsiveness
AhDREB-5	Box 4	Petroselinum crispum	1432	-	6	ATTAAT	part of a conserved DNA module involved in light responsiveness
AhDREB-5	Box 4	Petroselinum crispum	1334	-	6	ATTAAT	part of a conserved DNA module involved in light responsiveness
AhDREB-5	Box 4	Petroselinum crispum	1444	-	6	ATTAAT	part of a conserved DNA module involved in light responsiveness
AhDREB-5	Box 4	Petroselinum crispum	928	-	6	ATTAAT	part of a conserved DNA module involved in light responsiveness
AhDREB-5	Box 4	Petroselinum crispum	894	-	6	ATTAAT	part of a conserved DNA module involved in light responsiveness
AhDREB-5	LTR	Hordeum vulgare	90	-	6	CCGAAA	cis-acting element involved in low-temperature responsiveness
AhDREB-5	LTR	Hordeum vulgare	1069	+	6	CCGAAA	cis-acting element involved in low-temperature responsiveness
AhDREB-5	MBS	Arabidopsis thaliana	1111	-	6	CAACTG	MYB binding site involved in drought-inducibility
AhDREB-5	RY-element	Helianthus annuus	209	+	8	CATGCATG	cis-acting regulatory element involved in seed-specific regulation
AhDREB-6	ABRE	Arabidopsis thaliana	1316	+	5	ACGTG	cis-acting element involved in the abscisic acid responsiveness
AhDREB-6	AE-box	Arabidopsis thaliana	335	-	8	AGAAACTT	part of a module for light response
AhDREB-6	AT-rich element	Glycine max	130	-	10	ATAGAAATCAA	binding site of AT-rich DNA binding protein (ATBP-1)
AhDREB-6	Box 4	Petroselinum crispum	1052	-	6	ATTAAT	part of a conserved DNA module involved in light responsiveness
AhDREB-6	Box 4	Petroselinum crispum	646	+	6	ATTAAT	part of a conserved DNA module involved in light responsiveness
AhDREB-6	Box 4	Petroselinum crispum	1056	-	6	ATTAAT	part of a conserved DNA module involved in light responsiveness
AhDREB-6	Box II	Solanum tuberosum	611	-	9	TGGTAATAA	part of a light responsive element
AhDREB-6	G-box	Zea mays	1315	-	6	CACGTC	cis-acting regulatory element involved in light responsiveness
AhDREB-6	MRE	Petroselinum crispum	1477	-	7	AACCTAA	MYB binding site involved in light responsiveness
AhDREB-7	ABRE	Arabidopsis thaliana	629	-	5	ACGTG	cis-acting element involved in the abscisic acid responsiveness
AhDREB-7	AT1-motif	Solanum tuberosum	953	+	13	AATTATTTTTTATT	part of a light responsive module
AhDREB-7	AT1-motif	Solanum tuberosum	1153	-	13	AATTATTTTTTATT	part of a light responsive module
AhDREB-7	Box 4	Petroselinum crispum	1340	-	6	ATTAAT	part of a conserved DNA module involved in light responsiveness
AhDREB-7	Box 4	Petroselinum crispum	483	+	6	ATTAAT	part of a conserved DNA module involved in light responsiveness
AhDREB-7	Box 4	Petroselinum crispum	184	+	6	ATTAAT	part of a conserved DNA module involved in light responsiveness
AhDREB-7	Box 4	Petroselinum crispum	1182	-	6	ATTAAT	part of a conserved DNA module involved in light responsiveness
AhDREB-7	Box III	Pisum sativum	550	+	11	atCATTTTCACt	protein binding site
AhDREB-7	CGTCA-motif	Hordeum vulgare	194	-	5	CGTCA	cis-acting regulatory element involved in the MeJA-responsiveness
AhDREB-7	G-box	Arabidopsis thaliana	629	-	6	TACGTG	cis-acting regulatory element involved in light responsiveness
AhDREB-7	GT1-motif	Arabidopsis thaliana	1249	-	6	GGTTAA	light responsive element
AhDREB-7	MRE	Petroselinum crispum	999	-	7	AACCTAA	MYB binding site involved in light responsiveness
AhDREB-7	TC-rich repeats	Nicotiana tabacum	167	+	9	ATTCTCTAAC	cis-acting element involved in defense and stress responsiveness
AhDREB-7	TGACG-motif	Hordeum vulgare	194	+	5	TGACG	cis-acting regulatory element involved in the MeJA-responsiveness
AhDREB-8	ARE	Zea mays	80	+	6	AAACCA	cis-acting regulatory element essential for the anaerobic induction
AhDREB-8	ARE	Zea mays	625	-	6	AAACCA	cis-acting regulatory element essential for the anaerobic induction
AhDREB-8	ATC-motif	Spinacia oleracea	747	+	8	AGTAATCT	part of a conserved DNA module involved in light responsiveness
AhDREB-8	ATCT-motif	Pisum sativum	1180	-	9	AATCTAATCC	part of a conserved DNA module involved in light responsiveness
AhDREB-8	Box 4	Petroselinum crispum	1116	-	6	ATTAAT	part of a conserved DNA module involved in light responsiveness
AhDREB-8	Box 4	Petroselinum crispum	825	-	6	ATTAAT	part of a conserved DNA module involved in light responsiveness
AhDREB-8	Box 4	Petroselinum crispum	225	+	6	ATTAAT	part of a conserved DNA module involved in light responsiveness
AhDREB-8	Box 4	Petroselinum crispum	711	+	6	ATTAAT	part of a conserved DNA module involved in light responsiveness
AhDREB-8	Box 4	Petroselinum crispum	1187	-	6	ATTAAT	part of a conserved DNA module involved in light responsiveness
AhDREB-8	GATA-motif	Arabidopsis thaliana	469	+	10	AAGATAAGATT	part of a light responsive element
AhDREB-8	GATA-motif	Arabidopsis thaliana	503	+	10	AAGATAAGATT	part of a light responsive element
AhDREB-8	GATA-motif	Arabidopsis thaliana	474	+	10	AAGATAAGATT	part of a light responsive element
AhDREB-8	GT1-motif	Arabidopsis thaliana	1237	+	6	GGTTAA	light responsive element
AhDREB-8	Gap-box	Arabidopsis thaliana	807	-	9.5	CAAATGAA(A/G)A	part of a light responsive element
AhDREB-8	P-box	Oryza sativa	104	+	7	CCTTTTG	gibberellin-responsive element
AhDREB-8	TC-rich repeats	Nicotiana tabacum	1027	+	9	ATTCTCTAAC	cis-acting element involved in defense and stress responsiveness
AhDREB-8	TCA-element	Nicotiana tabacum	27	+	9	CCATCTTTTT	cis-acting element involved in salicylic acid responsiveness
AhDREB-8	TCT-motif	Arabidopsis thaliana	1066	-	6	TCTTAC	part of a light responsive element
AhDREB-9	ARE	Zea mays	245	-	6	AAACCA	cis-acting regulatory element essential for the anaerobic induction
AhDREB-9	AT1-motif	Solanum tuberosum	1265	-	13	AATTATTTTTTATT	part of a light responsive module
AhDREB-9	Box 4	Petroselinum crispum	886	-	6	ATTAAT	part of a conserved DNA module involved in light responsiveness
AhDREB-9	Box 4	Petroselinum crispum	898	-	6	ATTAAT	part of a conserved DNA module involved in light responsiveness
AhDREB-9	Box 4	Petroselinum crispum	1009	-	6	ATTAAT	part of a conserved DNA module involved in light responsiveness
AhDREB-9	Box 4	Petroselinum crispum	773	-	6	ATTAAT	part of a conserved DNA module involved in light responsiveness
AhDREB-9	Box 4	Petroselinum crispum	1099	-	6	ATTAAT	part of a conserved DNA module involved in light responsiveness
AhDREB-9	Box 4	Petroselinum crispum	993	-	6	ATTAAT	part of a conserved DNA module involved in light responsiveness
AhDREB-9	CAT-box	Arabidopsis thaliana	21	-	6	GCCACT	cis-acting regulatory element related to meristem expression
AhDREB-9	CGTCA-motif	Hordeum vulgare	1478	+	5	CGTCA	cis-acting regulatory element involved in the MeJA-responsiveness
AhDREB-9	G-box	Zea mays	115	-	6	CACGAC	cis-acting regulatory element involved in light responsiveness
AhDREB-9	GA-motif	Arabidopsis thaliana	191	-	8	ATAGATAA	part of a light responsive element
AhDREB-9	GT1-motif	Avena sativa	622	+	7	GGTTAAT	light responsive element
AhDREB-9	O2-site	Zea mays	1318	+	9	GATGATGTGG	cis-acting regulatory element involved in zein metabolism regulation
AhDREB-9	TCA-element	Brassica oleracea	1448	-	9	TCAGAAGAGG	cis-acting element involved in salicylic acid responsiveness
AhDREB-9	TGACG-motif	Hordeum vulgare	1478	-	5	TGACG	cis-acting regulatory element involved in the MeJA-responsiveness
AhDREB-10	ABRE	Arabidopsis thaliana	510	+	5	ACGTG	cis-acting element involved in the abscisic acid responsiveness
AhDREB-10	ABRE	Arabidopsis thaliana	694	+	6	CACGTG	cis-acting element involved in the abscisic acid responsiveness
AhDREB-10	ABRE	Arabidopsis thaliana	695	+	5	ACGTG	cis-acting element involved in the abscisic acid responsiveness
AhDREB-10	ABRE	Arabidopsis thaliana	611	+	5	ACGTG	cis-acting element involved in the abscisic acid responsiveness
AhDREB-10	AT-rich element	Glycine max	1356	+	10	ATAGAAATCAA	binding site of AT-rich DNA binding protein (ATBP-1)
AhDREB-10	Box 4	Petroselinum crispum	1439	-	6	ATTAAT	part of a conserved DNA module involved in light responsiveness
AhDREB-10	Box 4	Petroselinum crispum	933	-	6	ATTAAT	part of a conserved DNA module involved in light responsiveness
AhDREB-10	Box 4	Petroselinum crispum	1194	-	6	ATTAAT	part of a conserved DNA module involved in light responsiveness
AhDREB-10	CGTCA-motif	Hordeum vulgare	455	+	5	CGTCA	cis-acting regulatory element involved in the MeJA-responsiveness
AhDREB-10	CGTCA-motif	Hordeum vulgare	1229	+	5	CGTCA	cis-acting regulatory element involved in the MeJA-responsiveness
AhDREB-10	CGTCA-motif	Hordeum vulgare	437	-	5	CGTCA	cis-acting regulatory element involved in the MeJA-responsiveness
AhDREB-10	G-Box	Pisum sativum	691	-	9	CACGTGAAA	cis-acting regulatory element involved in light responsiveness
AhDREB-10	G-Box	Pisum sativum	694	+	6	CACGTG	cis-acting regulatory element involved in light responsiveness
AhDREB-10	G-box	Arabidopsis thaliana	509	+	6	TACGTG	cis-acting regulatory element involved in light responsiveness
AhDREB-10	G-box	Arabidopsis thaliana	694	+	6	CACGTG	cis-acting regulatory element involved in light responsiveness
AhDREB-10	G-box	Arabidopsis thaliana	610	+	6	TACGTG	cis-acting regulatory element involved in light responsiveness
AhDREB-10	GA-motif	Arabidopsis thaliana	1	-	8	ATAGATAA	part of a light responsive element
AhDREB-10	GT1-motif	Arabidopsis thaliana	840	+	6	GGTTAA	light responsive element
AhDREB-10	Gap-box	Arabidopsis thaliana	489	-	9	CAAATGAA(A/G)A	part of a light responsive element
AhDREB-10	I-box	Triticum aestivum	578	+	8	AGATAAGG	part of a light responsive element
AhDREB-10	TC-rich repeats	Nicotiana tabacum	635	-	9	ATTCTCTAAC	cis-acting element involved in defense and stress responsiveness
AhDREB-10	TGACG-motif	Hordeum vulgare	437	+	5	TGACG	cis-acting regulatory element involved in the MeJA-responsiveness
AhDREB-10	TGACG-motif	Hordeum vulgare	1229	-	5	TGACG	cis-acting regulatory element involved in the MeJA-responsiveness
AhDREB-10	TGACG-motif	Hordeum vulgare	455	-	5	TGACG	cis-acting regulatory element involved in the MeJA-responsiveness
AhDREB-10	circadian	Lycopersicon esculentum	797	-	9	CAAAGATATC	cis-acting regulatory element involved in circadian control
AhDREB-11	ARE	Zea mays	376	+	6	AAACCA	cis-acting regulatory element essential for the anaerobic induction
AhDREB-11	AT1-motif	Solanum tuberosum	1096	-	13	AATTATTTTTTATT	part of a light responsive module
AhDREB-11	Box 4	Petroselinum crispum	1197	-	6	ATTAAT	part of a conserved DNA module involved in light responsiveness
AhDREB-11	Box 4	Petroselinum crispum	554	+	6	ATTAAT	part of a conserved DNA module involved in light responsiveness
AhDREB-11	Box 4	Petroselinum crispum	638	+	6	ATTAAT	part of a conserved DNA module involved in light responsiveness
AhDREB-11	Box 4	Petroselinum crispum	615	+	6	ATTAAT	part of a conserved DNA module involved in light responsiveness
AhDREB-11	Box 4	Petroselinum crispum	1294	-	6	ATTAAT	part of a conserved DNA module involved in light responsiveness
AhDREB-11	Box 4	Petroselinum crispum	898	-	6	ATTAAT	part of a conserved DNA module involved in light responsiveness
AhDREB-11	Box 4	Petroselinum crispum	248	+	6	ATTAAT	part of a conserved DNA module involved in light responsiveness
AhDREB-11	Box 4	Petroselinum crispum	1114	-	6	ATTAAT	part of a conserved DNA module involved in light responsiveness
AhDREB-11	CAT-box	Arabidopsis thaliana	1481	-	6	GCCACT	cis-acting regulatory element related to meristem expression
AhDREB-11	GCN4_motif	Oryza sativa	759	+	7	TGAGTCA	cis-regulatory element involved in endosperm expression
AhDREB-11	GT1-motif	Arabidopsis thaliana	188	+	6	GGTTAA	light responsive element
AhDREB-11	GT1-motif	Arabidopsis thaliana	152	+	6	GGTTAA	light responsive element
AhDREB-11	LAMP-element	Pisum sativum	1283	+	8	CTTTATCA	part of a light responsive element
AhDREB-11	MRE	Petroselinum crispum	149	-	7	AACCTAA	MYB binding site involved in light responsiveness
AhDREB-11	O2-site	Zea mays	1032	-	9	GATGACATGG	cis-acting regulatory element involved in zein metabolism regulation
AhDREB-11	TCA-element	Nicotiana tabacum	308	-	9	CCATCTTTTT	cis-acting element involved in salicylic acid responsiveness
AhDREB-12	3-AF1 binding site	Solanum tuberosum	564	+	10	TAAGAGAGGAA	light responsive element
AhDREB-12	ABRE	Arabidopsis thaliana	665	+	6	CACGTG	cis-acting element involved in the abscisic acid responsiveness
AhDREB-12	ABRE	Hordeum vulgare	663	-	9	CGCACGTGTC	cis-acting element involved in the abscisic acid responsiveness
AhDREB-12	ABRE	Arabidopsis thaliana	666	+	5	ACGTG	cis-acting element involved in the abscisic acid responsiveness
AhDREB-12	ABRE	Arabidopsis thaliana	718	-	5	ACGTG	cis-acting element involved in the abscisic acid responsiveness
AhDREB-12	ARE	Zea mays	585	+	6	AAACCA	cis-acting regulatory element essential for the anaerobic induction
AhDREB-12	ARE	Zea mays	1492	-	6	AAACCA	cis-acting regulatory element essential for the anaerobic induction
AhDREB-12	ARE	Zea mays	1049	-	6	AAACCA	cis-acting regulatory element essential for the anaerobic induction
AhDREB-12	ATCT-motif	Pisum sativum	473	-	9	AATCTAATCC	part of a conserved DNA module involved in light responsiveness
AhDREB-12	ATCT-motif	Pisum sativum	468	-	9	AATCTAATCC	part of a conserved DNA module involved in light responsiveness
AhDREB-12	Box 4	Petroselinum crispum	1265	-	6	ATTAAT	part of a conserved DNA module involved in light responsiveness
AhDREB-12	Box 4	Petroselinum crispum	143	+	6	ATTAAT	part of a conserved DNA module involved in light responsiveness
AhDREB-12	Box 4	Petroselinum crispum	401	+	6	ATTAAT	part of a conserved DNA module involved in light responsiveness
AhDREB-12	CAT-box	Arabidopsis thaliana	641	-	6	GCCACT	cis-acting regulatory element related to meristem expression
AhDREB-12	CGTCA-motif	Hordeum vulgare	134	+	5	CGTCA	cis-acting regulatory element involved in the MeJA-responsiveness
AhDREB-12	CGTCA-motif	Hordeum vulgare	1022	+	5	CGTCA	cis-acting regulatory element involved in the MeJA-responsiveness
AhDREB-12	CGTCA-motif	Hordeum vulgare	720	+	5	CGTCA	cis-acting regulatory element involved in the MeJA-responsiveness
AhDREB-12	G-Box	Pisum sativum	665	+	6	CACGTG	cis-acting regulatory element involved in light responsiveness
AhDREB-12	G-box	Zea mays	718	+	6	CACGTC	cis-acting regulatory element involved in light responsiveness
AhDREB-12	G-box	Arabidopsis thaliana	665	+	6	CACGTG	cis-acting regulatory element involved in light responsiveness
AhDREB-12	GA-motif	Arabidopsis thaliana	1259	-	8	ATAGATAA	part of a light responsive element
AhDREB-12	GT1-motif	Arabidopsis thaliana	1271	+	6	GGTTAA	light responsive element
AhDREB-12	TCA-element	Nicotiana tabacum	529	-	9	CCATCTTTTT	cis-acting element involved in salicylic acid responsiveness
AhDREB-12	TGA-element	Brassica oleracea	906	+	6	AACGAC	auxin-responsive element
AhDREB-12	TGA-element	Brassica oleracea	1203	-	6	AACGAC	auxin-responsive element
AhDREB-12	TGACG-motif	Hordeum vulgare	1022	-	5	TGACG	cis-acting regulatory element involved in the MeJA-responsiveness
AhDREB-12	TGACG-motif	Hordeum vulgare	134	-	5	TGACG	cis-acting regulatory element involved in the MeJA-responsiveness
AhDREB-12	TGACG-motif	Hordeum vulgare	720	-	5	TGACG	cis-acting regulatory element involved in the MeJA-responsiveness
AhDREB-12	WUN-motif	Brassica oleracea	1231	-	9	AAATTTCCT	wound-responsive element
AhDREB-13	3-AF1 binding site	Solanum tuberosum	336	-	10	TAAGAGAGGAA	light responsive element
AhDREB-13	3-AF1 binding site	Solanum tuberosum	596	-	10	TAAGAGAGGAA	light responsive element
AhDREB-13	ARE	Zea mays	1429	+	6	AAACCA	cis-acting regulatory element essential for the anaerobic induction
AhDREB-13	ARE	Zea mays	238	+	6	AAACCA	cis-acting regulatory element essential for the anaerobic induction
AhDREB-13	ARE	Zea mays	811	-	6	AAACCA	cis-acting regulatory element essential for the anaerobic induction
AhDREB-13	Box 4	Petroselinum crispum	992	-	6	ATTAAT	part of a conserved DNA module involved in light responsiveness
AhDREB-13	Box 4	Petroselinum crispum	1149	-	6	ATTAAT	part of a conserved DNA module involved in light responsiveness
AhDREB-13	Box 4	Petroselinum crispum	722	+	6	ATTAAT	part of a conserved DNA module involved in light responsiveness
AhDREB-13	Box 4	Petroselinum crispum	555	+	6	ATTAAT	part of a conserved DNA module involved in light responsiveness
AhDREB-13	Box 4	Petroselinum crispum	123	+	6	ATTAAT	part of a conserved DNA module involved in light responsiveness
AhDREB-13	Box 4	Petroselinum crispum	176	+	6	ATTAAT	part of a conserved DNA module involved in light responsiveness
AhDREB-13	CGTCA-motif	Hordeum vulgare	562	-	5	CGTCA	cis-acting regulatory element involved in the MeJA-responsiveness
AhDREB-13	GATA-motif	Arabidopsis thaliana	547	+	10	AAGATAAGATT	part of a light responsive element
AhDREB-13	GATA-motif	Arabidopsis thaliana	878	+	7	GATAGGA	part of a light responsive element
AhDREB-13	GCN4_motif	Oryza sativa	851	+	7	TGAGTCA	cis-regulatory element involved in endosperm expression
AhDREB-13	GCN4_motif	Oryza sativa	842	-	7	TGAGTCA	cis-regulatory element involved in endosperm expression
AhDREB-13	MRE	Petroselinum crispum	353	-	7	AACCTAA	MYB binding site involved in light responsiveness
AhDREB-13	Sp1	Oryza sativa	1250	-	6	GGGCGG	light responsive element
AhDREB-13	TC-rich repeats	Nicotiana tabacum	813	+	9	GTTTTCTTAC	cis-acting element involved in defense and stress responsiveness
AhDREB-13	TCA-element	Nicotiana tabacum	619	+	9	CCATCTTTTT	cis-acting element involved in salicylic acid responsiveness
AhDREB-13	TCT-motif	Arabidopsis thaliana	602	+	6	TCTTAC	part of a light responsive element
AhDREB-13	TGACG-motif	Hordeum vulgare	562	+	5	TGACG	cis-acting regulatory element involved in the MeJA-responsiveness
AhDREB-13	circadian	Lycopersicon esculentum	478	-	9	CAAAGATATC	cis-acting regulatory element involved in circadian control
AhDREB-14	ABRE	Arabidopsis thaliana	949	-	5	ACGTG	cis-acting element involved in the abscisic acid responsiveness
AhDREB-14	ABRE	Arabidopsis thaliana	865	-	6	CACGTG	cis-acting element involved in the abscisic acid responsiveness
AhDREB-14	ABRE	Arabidopsis thaliana	866	+	5	ACGTG	cis-acting element involved in the abscisic acid responsiveness
AhDREB-14	Box 4	Petroselinum crispum	161	+	6	ATTAAT	part of a conserved DNA module involved in light responsiveness
AhDREB-14	Box 4	Petroselinum crispum	1390	-	6	ATTAAT	part of a conserved DNA module involved in light responsiveness
AhDREB-14	Box 4	Petroselinum crispum	165	+	6	ATTAAT	part of a conserved DNA module involved in light responsiveness
AhDREB-14	Box 4	Petroselinum crispum	503	+	6	ATTAAT	part of a conserved DNA module involved in light responsiveness
AhDREB-14	CAT-box	Arabidopsis thaliana	819	+	6	GCCACT	cis-acting regulatory element related to meristem expression
AhDREB-14	G-Box	Pisum sativum	865	-	6	CACGTG	cis-acting regulatory element involved in light responsiveness
AhDREB-14	G-box	Arabidopsis thaliana	865	-	6	CACGTG	cis-acting regulatory element involved in light responsiveness
AhDREB-14	G-box	Arabidopsis thaliana	949	-	6	TACGTG	cis-acting regulatory element involved in light responsiveness
AhDREB-14	GATA-motif	Pisum sativum	51	+	7	GATAGGG	part of a light responsive element
AhDREB-14	GATA-motif	Solanum tuberosum	431	+	9	AAGGATAAGG	part of a light responsive element
AhDREB-14	LTR	Hordeum vulgare	578	+	6	CCGAAA	cis-acting element involved in low-temperature responsiveness
AhDREB-14	O2-site	Zea mays	380	-	10	GATGACATGG	cis-acting regulatory element involved in zein metabolism regulation
AhDREB-14	RY-element	Helianthus annuus	735	+	8	CATGCATG	cis-acting regulatory element involved in seed-specific regulation
AhDREB-14	RY-element	Helianthus annuus	627	+	8	CATGCATG	cis-acting regulatory element involved in seed-specific regulation
AhDREB-14	TATC-box	Oryza sativa	1108	+	7	TATCCCA	cis-acting element involved in gibberellin-responsiveness
AhDREB-14	TATC-box	Oryza sativa	661	+	7	TATCCCA	cis-acting element involved in gibberellin-responsiveness
AhDREB-14	TCT-motif	Arabidopsis thaliana	1464	-	6	TCTTAC	part of a light responsive element
AhDREB-14	TGA-element	Brassica oleracea	957	+	6	AACGAC	auxin-responsive element
AhDREB-15	3-AF1 binding site	Solanum tuberosum	266	-	10	TAAGAGAGGAA	light responsive element
AhDREB-15	ABRE	Arabidopsis thaliana	1354	-	5	ACGTG	cis-acting element involved in the abscisic acid responsiveness
AhDREB-15	ABRE	Triticum aestivum	1352	-	9	GACACGTGGC	cis-acting element involved in the abscisic acid responsiveness
AhDREB-15	ABRE	Arabidopsis thaliana	872	-	5	ACGTG	cis-acting element involved in the abscisic acid responsiveness
AhDREB-15	ARE	Zea mays	1034	+	6	AAACCA	cis-acting regulatory element essential for the anaerobic induction
AhDREB-15	ARE	Zea mays	12	-	6	AAACCA	cis-acting regulatory element essential for the anaerobic induction
AhDREB-15	ARE	Zea mays	1313	-	6	AAACCA	cis-acting regulatory element essential for the anaerobic induction
AhDREB-15	ARE	Zea mays	966	+	6	AAACCA	cis-acting regulatory element essential for the anaerobic induction
AhDREB-15	AuxRR-core	Nicotiana tabacum	807	+	7	GGTCCAT	cis-acting regulatory element involved in auxin responsiveness
AhDREB-15	G-box	Arabidopsis thaliana	872	-	6	TACGTG	cis-acting regulatory element involved in light responsiveness
AhDREB-15	G-box	Zea mays	1354	+	6	CACGTC	cis-acting regulatory element involved in light responsiveness
AhDREB-15	GT1-motif	Arabidopsis thaliana	797	+	6	GGTTAA	light responsive element
AhDREB-15	GT1-motif	Arabidopsis thaliana	294	+	6	GGTTAA	light responsive element
AhDREB-15	MBS	Arabidopsis thaliana	8	+	6	CAACTG	MYB binding site involved in drought-inducibility
AhDREB-15	TCA-element	Nicotiana tabacum	544	-	9	CCATCTTTTT	cis-acting element involved in salicylic acid responsiveness
AhDREB-15	TGA-element	Brassica oleracea	1002	+	6	AACGAC	auxin-responsive element
AhDREB-16	AE-box	Arabidopsis thaliana	627	+	8	AGAAACTT	part of a module for light response
AhDREB-16	ARE	Zea mays	37	-	6	AAACCA	cis-acting regulatory element essential for the anaerobic induction
AhDREB-16	AT1-motif	Solanum tuberosum	1256	+	13	AATTATTTTTTATT	part of a light responsive module
AhDREB-16	AT1-motif	Solanum tuberosum	725	+	13	AATTATTTTTTATT	part of a light responsive module
AhDREB-16	Box 4	Petroselinum crispum	1234	-	6	ATTAAT	part of a conserved DNA module involved in light responsiveness
AhDREB-16	Box 4	Petroselinum crispum	1406	-	6	ATTAAT	part of a conserved DNA module involved in light responsiveness
AhDREB-16	Box 4	Petroselinum crispum	1212	-	6	ATTAAT	part of a conserved DNA module involved in light responsiveness
AhDREB-16	Box 4	Petroselinum crispum	1184	-	6	ATTAAT	part of a conserved DNA module involved in light responsiveness
AhDREB-16	Box 4	Petroselinum crispum	1364	-	6	ATTAAT	part of a conserved DNA module involved in light responsiveness
AhDREB-16	LAMP-element	Pisum sativum	354	+	8	CTTTATCA	part of a light responsive element
AhDREB-16	WUN-motif	Brassica oleracea	580	-	9	AAATTTCCT	wound-responsive element
AhDREB-16	chs-CMA1a	Daucus carota	254	-	8	TTACTTAA	part of a light responsive element
AhDREB-17	ABRE	Arabidopsis thaliana	145	+	5	ACGTG	cis-acting element involved in the abscisic acid responsiveness
AhDREB-17	ABRE	Arabidopsis thaliana	1257	-	5	ACGTG	cis-acting element involved in the abscisic acid responsiveness
AhDREB-17	ABRE	Arabidopsis thaliana	1227	+	5	ACGTG	cis-acting element involved in the abscisic acid responsiveness
AhDREB-17	ABRE	Arabidopsis thaliana	1291	+	5	ACGTG	cis-acting element involved in the
AhDREB-17	ACA-motif	Arabidopsis thaliana	437	-	12	AATCACAACCATA	part of gapA in (gapA-CMA1) involved with light responsiveness
AhDREB-17	AE-box	Arabidopsis thaliana	40	-	8	AGAAACAA	part of a module for light response
AhDREB-17	AT-rich element	Glycine max	254	+	10	ATAGAAATCAA	binding site of AT-rich DNA binding protein (ATBP-1)
AhDREB-17	AT-rich element	Glycine max	837	-	10	ATAGAAATCAA	binding site of AT-rich DNA binding protein (ATBP-1)
AhDREB-17	Box 4	Petroselinum crispum	1441	-	6	ATTAAT	part of a conserved DNA module involved in light responsiveness
AhDREB-17	Box 4	Petroselinum crispum	836	-	6	ATTAAT	part of a conserved DNA module involved in light responsiveness
AhDREB-17	Box 4	Petroselinum crispum	1433	-	6	ATTAAT	part of a conserved DNA module involved in light responsiveness
AhDREB-17	Box 4	Petroselinum crispum	230	+	6	ATTAAT	part of a conserved DNA module involved in light responsiveness
AhDREB-17	CGTCA-motif	Hordeum vulgare	1165	-	5	CGTCA	cis-acting regulatory element involved in the MeJA-responsiveness
AhDREB-17	G-Box	Pisum sativum	1226	-	6	CACGTT	cis-acting regulatory element involved in light responsiveness
AhDREB-17	G-Box	Pisum sativum	1290	-	6	CACGTT	cis-acting regulatory element involved in light responsiveness
AhDREB-17	G-box	Arabidopsis thaliana	144	+	6	TACGTG	cis-acting regulatory element involved in light responsiveness
AhDREB-17	G-box	Arabidopsis thaliana	1257	-	6	TACGTG	cis-acting regulatory element involved in light responsiveness
AhDREB-17	TGACG-motif	Hordeum vulgare	1165	+	5	TGACG	cis-acting regulatory element involved in the MeJA-responsiveness
AhDREB-17	chs-CMA1a	Daucus carota	665	-	8	TTACTTAA	part of a light responsive element
AhDREB-17	chs-CMA2a	Petroselinum crispum	99	+	8	TCACTTGA	part of a light responsive element
AhDREB-18	AuxRR-core	Nicotiana tabacum	1348	+	7	GGTCCAT	cis-acting regulatory element involved in auxin responsiveness
AhDREB-18	Box 4	Petroselinum crispum	1113	-	6	ATTAAT	part of a conserved DNA module involved in light responsiveness
AhDREB-18	Box 4	Petroselinum crispum	1209	-	6	ATTAAT	part of a conserved DNA module involved in light responsiveness
AhDREB-18	Box 4	Petroselinum crispum	359	+	6	ATTAAT	part of a conserved DNA module involved in light responsiveness
AhDREB-18	Box 4	Petroselinum crispum	1130	-	6	ATTAAT	part of a conserved DNA module involved in light responsiveness
AhDREB-18	Box 4	Petroselinum crispum	995	-	6	ATTAAT	part of a conserved DNA module involved in light responsiveness
AhDREB-18	GT1-motif	Arabidopsis thaliana	328	-	6	GGTTAA	light responsive element
AhDREB-18	GT1-motif	Arabidopsis thaliana	158	-	6	GGTTAA	light responsive element
AhDREB-18	GT1-motif	Arabidopsis thaliana	889	+	6	GGTTAA	light responsive element
AhDREB-18	P-box	Oryza sativa	1435	+	7	CCTTTTG	gibberellin-responsive element
AhDREB-18	TCCC-motif	Spinacia oleracea	1280	-	7	TCTCCCT	part of a light responsive element
AhDREB-18	TGA-element	Brassica oleracea	1023	+	6	AACGAC	auxin-responsive element
AhDREB-18	chs-CMA1a	Daucus carota	177	-	8	TTACTTAA	part of a light responsive element
AhDREB-19	3-AF1 binding site	Solanum tuberosum	679	+	10	TAAGAGAGGAA	light responsive element
AhDREB-19	Box 4	Petroselinum crispum	1152	-	6	ATTAAT	part of a conserved DNA module involved in light responsiveness
AhDREB-19	Box 4	Petroselinum crispum	964	-	6	ATTAAT	part of a conserved DNA module involved in light responsiveness
AhDREB-19	Box 4	Petroselinum crispum	772	-	6	ATTAAT	part of a conserved DNA module involved in light responsiveness
AhDREB-19	Box 4	Petroselinum crispum	760	-	6	ATTAAT	part of a conserved DNA module involved in light responsiveness
AhDREB-19	Box 4	Petroselinum crispum	729	+	6	ATTAAT	part of a conserved DNA module involved in light responsiveness
AhDREB-19	Box 4	Petroselinum crispum	529	+	6	ATTAAT	part of a conserved DNA module involved in light responsiveness
AhDREB-19	Box 4	Petroselinum crispum	359	+	6	ATTAAT	part of a conserved DNA module involved in light responsiveness
AhDREB-19	Box 4	Petroselinum crispum	421	+	6	ATTAAT	part of a conserved DNA module involved in light responsiveness
AhDREB-19	CGTCA-motif	Hordeum vulgare	1006	+	5	CGTCA	cis-acting regulatory element involved in the MeJA-responsiveness
AhDREB-19	GATA-motif	Solanum tuberosum	1407	-	9	AAGGATAAGG	part of a light responsive element
AhDREB-19	GCN4_motif	Oryza sativa	985	-	7	TGAGTCA	cis-regulatory element involved in endosperm expression
AhDREB-19	GT1-motif	Arabidopsis thaliana	1375	+	6	GGTTAA	light responsive element
AhDREB-19	MRE	Petroselinum crispum	300	+	7	AACCTAA	MYB binding site involved in light responsiveness
AhDREB-19	TC-rich repeats	Nicotiana tabacum	562	-	9	GTTTTCTTAC	cis-acting element involved in defense and stress responsiveness
AhDREB-19	TC-rich repeats	Nicotiana tabacum	901	-	9	GTTTTCTTAC	cis-acting element involved in defense and stress responsiveness
AhDREB-19	TGA-element	Brassica oleracea	971	-	6	AACGAC	auxin-responsive element
AhDREB-19	TGACG-motif	Hordeum vulgare	1006	-	5	TGACG	cis-acting regulatory element involved in the MeJA-responsiveness
AhDREB-20	Box 4	Petroselinum crispum	163	+	6	ATTAAT	part of a conserved DNA module involved in light responsiveness
AhDREB-20	Box 4	Petroselinum crispum	200	+	6	ATTAAT	part of a conserved DNA module involved in light responsiveness
AhDREB-20	CGTCA-motif	Hordeum vulgare	1076	+	5	CGTCA	cis-acting regulatory element involved in the MeJA-responsiveness
AhDREB-20	GATA-motif	Arabidopsis thaliana	880	-	10	AAGATAAGATT	part of a light responsive element
AhDREB-20	P-box	Oryza sativa	1465	-	7	CCTTTTG	gibberellin-responsive element
AhDREB-20	TGA-element	Brassica oleracea	1007	-	6	AACGAC	auxin-responsive element
AhDREB-20	TGACG-motif	Hordeum vulgare	1076	-	5	TGACG	cis-acting regulatory element involved in the MeJA-responsiveness
AhDREB-20	WUN-motif	Brassica oleracea	241	-	9	AAATTTCCT	wound-responsive element
AhDREB-20	chs-CMA1a	Daucus carota	842	+	8	TTACTTAA	part of a light responsive element
AhDREB-21	AE-box	Arabidopsis thaliana	913	+	8	AGAAACTT	part of a module for light response
AhDREB-21	AT-rich element	Glycine max	456	+	10	ATAGAAATCAA	binding site of AT-rich DNA binding protein (ATBP-1)
AhDREB-21	Box 4	Petroselinum crispum	159	+	6	ATTAAT	part of a conserved DNA module involved in light responsiveness
AhDREB-21	Box 4	Petroselinum crispum	1412	-	6	ATTAAT	part of a conserved DNA module involved in light responsiveness
AhDREB-21	Box 4	Petroselinum crispum	257	+	6	ATTAAT	part of a conserved DNA module involved in light responsiveness
AhDREB-21	Box 4	Petroselinum crispum	1342	-	6	ATTAAT	part of a conserved DNA module involved in light responsiveness
AhDREB-21	G-box	Zea mays	744	-	6	CACGAC	cis-acting regulatory element involved in light responsiveness
AhDREB-21	GT1-motif	Arabidopsis thaliana	490	-	6	GGTTAA	light responsive element
AhDREB-21	GT1-motif	Avena sativa	272	+	7	GGTTAAT	light responsive element
AhDREB-21	MBS	Arabidopsis thaliana	942	+	6	CAACTG	MYB binding site involved in drought-inducibility
AhDREB-21	MBS	Arabidopsis thaliana	553	-	6	CAACTG	MYB binding site involved in drought-inducibility
AhDREB-21	TCA-element	Nicotiana tabacum	1071	-	9	CCATCTTTTT	cis-acting element involved in salicylic acid responsiveness
AhDREB-21	TCCC-motif	Spinacia oleracea	1008	+	7	TCTCCCT	part of a light responsive element
AhDREB-21	circadian	Lycopersicon esculentum	1092	+	9	CAAAGATATC	cis-acting regulatory element involved in circadian control
AhDREB-22	ABRE	Arabidopsis thaliana	939	-	5	ACGTG	cis-acting element involved in the abscisic acid responsiveness
AhDREB-22	ABRE	Arabidopsis thaliana	1179	-	5	ACGTG	cis-acting element involved in the abscisic acid responsiveness
AhDREB-22	AT1-motif	Solanum tuberosum	673	+	13	AATTATTTTTTATT	part of a light responsive module
AhDREB-22	Box 4	Petroselinum crispum	1011	-	6	ATTAAT	part of a conserved DNA module involved in light responsiveness
AhDREB-22	Box 4	Petroselinum crispum	807	-	6	ATTAAT	part of a conserved DNA module involved in light responsiveness
AhDREB-22	Box 4	Petroselinum crispum	843	-	6	ATTAAT	part of a conserved DNA module involved in light responsiveness
AhDREB-22	CGTCA-motif	Hordeum vulgare	524	+	5	CGTCA	cis-acting regulatory element involved in the MeJA-responsiveness
AhDREB-22	G-box	Arabidopsis thaliana	1179	-	6	TACGTG	cis-acting regulatory element involved in light responsiveness
AhDREB-22	G-box	Arabidopsis thaliana	939	-	6	TACGTG	cis-acting regulatory element involved in light responsiveness
AhDREB-22	GA-motif	Arabidopsis thaliana	115	-	8	ATAGATAA	part of a light responsive element
AhDREB-22	GATA-motif	Solanum tuberosum	400	+	9	AAGGATAAGG	part of a light responsive element
AhDREB-22	GT1-motif	Arabidopsis thaliana	70	-	6	GGTTAA	light responsive element
AhDREB-22	P-box	Oryza sativa	1451	-	7	CCTTTTG	gibberellin-responsive element
AhDREB-22	TGACG-motif	Hordeum vulgare	524	-	5	TGACG	cis-acting regulatory element involved in the MeJA-responsiveness
AhDREB-23	ABRE	Arabidopsis thaliana	1004	+	5	ACGTG	cis-acting element involved in the abscisic acid responsiveness
AhDREB-23	ABRE	Arabidopsis thaliana	972	+	5	ACGTG	cis-acting element involved in the abscisic acid responsiveness
AhDREB-23	ABRE	Arabidopsis thaliana	2	-	5	ACGTG	cis-acting element involved in the abscisic acid responsiveness
AhDREB-23	ABRE	Arabidopsis thaliana	971	-	6	CACGTG	cis-acting element involved in the abscisic acid responsiveness
AhDREB-23	ARE	Zea mays	94	+	6	AAACCA	cis-acting regulatory element essential for the anaerobic induction
AhDREB-23	AT1-motif	Solanum tuberosum	754	-	13	AATTATTTTTTATT	part of a light responsive module
AhDREB-23	AT1-motif	Solanum tuberosum	656	-	13	AATTATTTTTTATT	part of a light responsive module
AhDREB-23	Box 4	Petroselinum crispum	335	+	6	ATTAAT	part of a conserved DNA module involved in light responsiveness
AhDREB-23	Box 4	Petroselinum crispum	373	+	6	ATTAAT	part of a conserved DNA module involved in light responsiveness
AhDREB-23	Box 4	Petroselinum crispum	1045	-	6	ATTAAT	part of a conserved DNA module involved in light responsiveness
AhDREB-23	Box 4	Petroselinum crispum	1145	-	6	ATTAAT	part of a conserved DNA module involved in light responsiveness
AhDREB-23	G-Box	Pisum sativum	971	-	6	CACGTG	cis-acting regulatory element involved in light responsiveness
AhDREB-23	G-Box	Pisum sativum	1003	-	6	CACGTT	cis-acting regulatory element involved in light responsiveness
AhDREB-23	G-box	Arabidopsis thaliana	971	-	6	CACGTG	cis-acting regulatory element involved in light responsiveness
AhDREB-23	G-box	Arabidopsis thaliana	2	-	6	TACGTG	cis-acting regulatory element involved in light responsiveness
AhDREB-23	LTR	Hordeum vulgare	880	+	6	CCGAAA	cis-acting element involved in low-temperature responsiveness
AhDREB-23	TGA-element	Brassica oleracea	926	+	6	AACGAC	auxin-responsive element
AhDREB-24	ARE	Zea mays	34	-	6	AAACCA	cis-acting regulatory element essential for the anaerobic induction
AhDREB-24	AT-rich element	Glycine max	686	+	10	ATAGAAATCAA	binding site of AT-rich DNA binding protein (ATBP-1)
AhDREB-24	Box 4	Petroselinum crispum	1039	-	6	ATTAAT	part of a conserved DNA module involved in light responsiveness
AhDREB-24	Box 4	Petroselinum crispum	1069	-	6	ATTAAT	part of a conserved DNA module involved in light responsiveness
AhDREB-24	Box 4	Petroselinum crispum	1183	-	6	ATTAAT	part of a conserved DNA module involved in light responsiveness
AhDREB-24	Box 4	Petroselinum crispum	1056	-	6	ATTAAT	part of a conserved DNA module involved in light responsiveness
AhDREB-24	Box 4	Petroselinum crispum	1157	-	6	ATTAAT	part of a conserved DNA module involved in light responsiveness
AhDREB-24	Box 4	Petroselinum crispum	1073	-	6	ATTAAT	part of a conserved DNA module involved in light responsiveness
AhDREB-24	GATA-motif	Solanum tuberosum	1290	-	9	AAGGATAAGG	part of a light responsive element
AhDREB-24	GT1-motif	Avena sativa	917	+	7	GGTTAAT	light responsive element
AhDREB-24	LTR	Hordeum vulgare	46	-	6	CCGAAA	cis-acting element involved in low-temperature responsiveness
AhDREB-24	P-box	Oryza sativa	1424	+	7	CCTTTTG	gibberellin-responsive element
AhDREB-24	TCCC-motif	Spinacia oleracea	1397	+	7	TCTCCCT	part of a light responsive element
AhDREB-25	ABRE	Arabidopsis thaliana	1340	-	5	ACGTG	cis-acting element involved in the abscisic acid responsiveness
AhDREB-25	ARE	Zea mays	875	-	6	AAACCA	cis-acting regulatory element essential for the anaerobic induction
AhDREB-25	ARE	Zea mays	1056	+	6	AAACCA	cis-acting regulatory element essential for the anaerobic induction
AhDREB-25	Box 4	Petroselinum crispum	1375	-	6	ATTAAT	part of a conserved DNA module involved in light responsiveness
AhDREB-25	CAT-box	Arabidopsis thaliana	1104	-	6	GCCACT	cis-acting regulatory element related to meristem expression
AhDREB-25	CGTCA-motif	Hordeum vulgare	118	+	5	CGTCA	cis-acting regulatory element involved in the MeJA-responsiveness
AhDREB-25	G-box	Arabidopsis thaliana	1340	-	6	TACGTG	cis-acting regulatory element involved in light responsiveness
AhDREB-25	LTR	Hordeum vulgare	1208	+	6	CCGAAA	cis-acting element involved in low-temperature responsiveness
AhDREB-25	TATC-box	Oryza sativa	1050	+	7	TATCCCA	cis-acting element involved in gibberellin-responsiveness
AhDREB-25	TCA-element	Brassica oleracea	1024	+	9	TCAGAAGAGG	cis-acting element involved in salicylic acid responsiveness
AhDREB-25	TCCC-motif	Spinacia oleracea	1301	-	7	TCTCCCT	part of a light responsive element
AhDREB-25	TCT-motif	Arabidopsis thaliana	437	+	6	TCTTAC	part of a light responsive element
AhDREB-25	TGACG-motif	Hordeum vulgare	118	-	5	TGACG	cis-acting regulatory element involved in the MeJA-responsiveness
AhDREB-25	chs-CMA1a	Daucus carota	992	-	8	TTACTTAA	part of a light responsive element
AhDREB-26	ABRE	Arabidopsis thaliana	279	-	5	ACGTG	cis-acting element involved in the abscisic acid responsiveness
AhDREB-26	ARE	Zea mays	1340	+	6	AAACCA	cis-acting regulatory element essential for the anaerobic induction
AhDREB-26	ARE	Zea mays	674	+	6	AAACCA	cis-acting regulatory element essential for the anaerobic induction
AhDREB-26	AT-rich element	Glycine max	381	+	10	ATAGAAATCAA	binding site of AT-rich DNA binding protein (ATBP-1)
AhDREB-26	AT-rich element	Glycine max	1068	+	10	ATAGAAATCAA	binding site of AT-rich DNA binding protein (ATBP-1)
AhDREB-26	Box 4	Petroselinum crispum	1215	-	6	ATTAAT	part of a conserved DNA module involved in light responsiveness
AhDREB-26	Box 4	Petroselinum crispum	44	+	6	ATTAAT	part of a conserved DNA module involved in light responsiveness
AhDREB-26	Box 4	Petroselinum crispum	66	+	6	ATTAAT	part of a conserved DNA module involved in light responsiveness
AhDREB-26	CGTCA-motif	Hordeum vulgare	281	+	5	CGTCA	cis-acting regulatory element involved in the MeJA-responsiveness
AhDREB-26	G-box	Zea mays	279	+	6	CACGTC	cis-acting regulatory element involved in light responsiveness
AhDREB-26	LAMP-element	Pisum sativum	203	-	8	CTTTATCA	part of a light responsive element
AhDREB-26	LTR	Hordeum vulgare	442	-	6	CCGAAA	cis-acting element involved in low-temperature responsiveness
AhDREB-26	MBS	Arabidopsis thaliana	1495	+	6	CAACTG	MYB binding site involved in drought-inducibility
AhDREB-26	MRE	Petroselinum crispum	837	-	7	AACCTAA	MYB binding site involved in light responsiveness
AhDREB-26	P-box	Oryza sativa	417	-	7	CCTTTTG	gibberellin-responsive element
AhDREB-26	TATC-box	Oryza sativa	1414	-	7	TATCCCA	cis-acting element involved in gibberellin-responsiveness
AhDREB-26	TCA-element	Nicotiana tabacum	677	+	9	CCATCTTTTT	cis-acting element involved in salicylic acid responsiveness
AhDREB-26	TGACG-motif	Hordeum vulgare	281	-	5	TGACG	cis-acting regulatory element involved in the MeJA-responsiveness
AhDREB-26	circadian	Lycopersicon esculentum	953	+	9	CAAAGATATC	cis-acting regulatory element involved in circadian control
AhDREB-27	ABRE	Arabidopsis thaliana	171	+	5	ACGTG	cis-acting element involved in the abscisic acid responsiveness
AhDREB-27	ABRE	Arabidopsis thaliana	1281	-	5	ACGTG	cis-acting element involved in the abscisic acid responsiveness
AhDREB-27	ACA-motif	Arabidopsis thaliana	460	-	12	AATCACAACCATA	part of gapA in (gapA-CMA1) involved with light responsiveness
AhDREB-27	ACE	Petroselinum crispum	1279	+	9	GACACGTATG	cis-acting element involved in light responsiveness
AhDREB-27	AE-box	Arabidopsis thaliana	112	-	8	AGAAACAA	part of a module for light response
AhDREB-27	AE-box	Arabidopsis thaliana	1404	-	8	AGAAACAA	part of a module for light response
AhDREB-27	ARE	Zea mays	916	-	6	AAACCA	cis-acting regulatory element essential for the anaerobic induction
AhDREB-27	Box 4	Petroselinum crispum	431	+	6	ATTAAT	part of a conserved DNA module involved in light responsiveness
AhDREB-27	Box 4	Petroselinum crispum	851	-	6	ATTAAT	part of a conserved DNA module involved in light responsiveness
AhDREB-27	Box 4	Petroselinum crispum	278	+	6	ATTAAT	part of a conserved DNA module involved in light responsiveness
AhDREB-27	CGTCA-motif	Hordeum vulgare	1187	-	5	CGTCA	cis-acting regulatory element involved in the MeJA-responsiveness
AhDREB-27	G-Box	Pisum sativum	170	-	6	CACGTT	cis-acting regulatory element involved in light responsiveness
AhDREB-27	G-Box	Triticum aestivum	1212	-	10	TCCACATGGCA	cis-acting regulatory element involved in light responsiveness
AhDREB-27	G-box	Arabidopsis thaliana	1281	-	6	TACGTG	cis-acting regulatory element involved in light responsiveness
AhDREB-27	GT1-motif	Arabidopsis thaliana	1476	-	6	GGTTAA	light responsive element
AhDREB-27	MBS	Arabidopsis thaliana	269	+	6	CAACTG	MYB binding site involved in drought-inducibility
AhDREB-27	TGACG-motif	Hordeum vulgare	1187	+	5	TGACG	cis-acting regulatory element involved in the MeJA-responsiveness
AhDREB-27	chs-CMA1a	Daucus carota	164	-	8	TTACTTAA	part of a light responsive element
AhDREB-27	chs-CMA1a	Daucus carota	305	+	8	TTACTTAA	part of a light responsive element
AhDREB-27	chs-CMA1a	Daucus carota	695	-	8	TTACTTAA	part of a light responsive element
AhDREB-28	ABRE	Arabidopsis thaliana	146	+	5	ACGTG	cis-acting element involved in the abscisic acid responsiveness
AhDREB-28	ABRE	Arabidopsis thaliana	72	+	5	ACGTG	cis-acting element involved in the abscisic acid responsiveness
AhDREB-28	ABRE	Triticum aestivum	1247	+	9	GACACGTGGC	cis-acting element involved in the abscisic acid responsiveness
AhDREB-28	ABRE	Arabidopsis thaliana	1289	-	5	ACGTG	cis-acting element involved in the abscisic acid responsiveness
AhDREB-28	ABRE	Arabidopsis thaliana	1354	-	5	ACGTG	cis-acting element involved in the abscisic acid responsiveness
AhDREB-28	ACE	Petroselinum crispum	1287	+	9	GACACGTATG	cis-acting element involved in light responsiveness
AhDREB-28	AE-box	Arabidopsis thaliana	127	-	8	AGAAACAA	part of a module for light response
AhDREB-28	AE-box	Arabidopsis thaliana	1470	-	8	AGAAACTT	part of a module for light response
AhDREB-28	ARE	Zea mays	1017	+	6	AAACCA	cis-acting regulatory element essential for the anaerobic induction
AhDREB-28	CAT-box	Arabidopsis thaliana	1458	-	6	GCCACT	cis-acting regulatory element related to meristem expression
AhDREB-28	CGTCA-motif	Hordeum vulgare	1204	-	5	CGTCA	cis-acting regulatory element involved in the MeJA-responsiveness
AhDREB-28	G-box	Arabidopsis thaliana	1354	-	6	TACGTG	cis-acting regulatory element involved in light responsiveness
AhDREB-28	G-box	Arabidopsis thaliana	145	+	6	TACGTG	cis-acting regulatory element involved in light responsiveness
AhDREB-28	G-box	Arabidopsis thaliana	71	+	6	TACGTG	cis-acting regulatory element involved in light responsiveness
AhDREB-28	G-box	Arabidopsis thaliana	1289	-	6	TACGTG	cis-acting regulatory element involved in light responsiveness
AhDREB-28	GT1-motif	Arabidopsis thaliana	1362	+	6	GGTTAA	light responsive element
AhDREB-28	I-box	Larix laricina	1167	+	9	GTATAAGGCC	part of a light responsive element
AhDREB-28	L-box	Petroselinum crispum	1261	-	10	ATCCCACCTAC	part of a light responsive element
AhDREB-28	LAMP-element	Spinacia oleracea	1166	-	9	CCTTATCCA	part of a light responsive element
AhDREB-28	TGA-box	Glycine max	1204	+	8	TGACGTAA	part of an auxin-responsive element
AhDREB-28	TGACG-motif	Hordeum vulgare	1204	+	5	TGACG	cis-acting regulatory element involved in the MeJA-responsiveness
AhDREB-28	chs-CMA1a	Daucus carota	677	-	8	TTACTTAA	part of a light responsive element
AhDREB-28	chs-CMA2a	Petroselinum crispum	98	+	8	TCACTTGA	part of a light responsive element
AhDREB-29	ARE	Zea mays	1170	-	6	AAACCA	cis-acting regulatory element essential for the anaerobic induction
AhDREB-29	ARE	Zea mays	518	-	6	AAACCA	cis-acting regulatory element essential for the anaerobic induction
AhDREB-29	Box 4	Petroselinum crispum	1432	-	6	ATTAAT	part of a conserved DNA module involved in light responsiveness
AhDREB-29	Box 4	Petroselinum crispum	1334	-	6	ATTAAT	part of a conserved DNA module involved in light responsiveness
AhDREB-29	Box 4	Petroselinum crispum	1322	-	6	ATTAAT	part of a conserved DNA module involved in light responsiveness
AhDREB-29	Box 4	Petroselinum crispum	928	-	6	ATTAAT	part of a conserved DNA module involved in light responsiveness
AhDREB-29	Box 4	Petroselinum crispum	894	-	6	ATTAAT	part of a conserved DNA module involved in light responsiveness
AhDREB-29	Box 4	Petroselinum crispum	1444	-	6	ATTAAT	part of a conserved DNA module involved in light responsiveness
AhDREB-29	LTR	Hordeum vulgare	90	-	6	CCGAAA	cis-acting element involved in low-temperature responsiveness
AhDREB-29	LTR	Hordeum vulgare	1069	+	6	CCGAAA	cis-acting element involved in low-temperature responsiveness
AhDREB-29	MBS	Arabidopsis thaliana	1111	-	6	CAACTG	MYB binding site involved in drought-inducibility
AhDREB-29	RY-element	Helianthus annuus	209	+	8	CATGCATG	cis-acting regulatory element involved in seed-specific regulation
AhDREB-30	ABRE	Arabidopsis thaliana	1336	+	5	ACGTG	cis-acting element involved in the abscisic acid responsiveness
AhDREB-30	AE-box	Arabidopsis thaliana	316	-	8	AGAAACTT	part of a module for light response
AhDREB-30	AT-rich element	Glycine max	111	-	10	ATAGAAATCAA	binding site of AT-rich DNA binding protein (ATBP-1)
AhDREB-30	Box 4	Petroselinum crispum	37	+	6	ATTAAT	part of a conserved DNA module involved in light responsiveness
AhDREB-30	Box 4	Petroselinum crispum	624	+	6	ATTAAT	part of a conserved DNA module involved in light responsiveness
AhDREB-30	Box 4	Petroselinum crispum	1065	-	6	ATTAAT	part of a conserved DNA module involved in light responsiveness
AhDREB-30	Box 4	Petroselinum crispum	1061	-	6	ATTAAT	part of a conserved DNA module involved in light responsiveness
AhDREB-30	Box 4	Petroselinum crispum	1057	-	6	ATTAAT	part of a conserved DNA module involved in light responsiveness
AhDREB-30	Box 4	Petroselinum crispum	240	+	6	ATTAAT	part of a conserved DNA module involved in light responsiveness
AhDREB-30	Box 4	Petroselinum crispum	236	+	6	ATTAAT	part of a conserved DNA module involved in light responsiveness
AhDREB-30	Box II	Solanum tuberosum	589	-	9	TGGTAATAA	part of a light responsive element
AhDREB-30	CGTCA-motif	Hordeum vulgare	266	-	5	CGTCA	cis-acting regulatory element involved in the MeJA-responsiveness
AhDREB-30	G-box	Zea mays	1335	-	6	CACGTC	cis-acting regulatory element involved in light responsiveness
AhDREB-30	GT1-motif	Arabidopsis thaliana	876	-	6	GGTTAA	light responsive element
AhDREB-30	MRE	Petroselinum crispum	1477	-	7	AACCTAA	MYB binding site involved in light
AhDREB-30	TCT-motif	Arabidopsis thaliana	512	-	6	TCTTAC	part of a light responsive element
AhDREB-30	TGACG-motif	Hordeum vulgare	266	+	5	TGACG	cis-acting regulatory element involved in the MeJA-responsiveness
AhDREB-31	Box 4	Petroselinum crispum	1058	-	6	ATTAAT	part of a conserved DNA module involved in light responsiveness
AhDREB-31	Box 4	Petroselinum crispum	1334	-	6	ATTAAT	part of a conserved DNA module involved in light responsiveness
AhDREB-31	Box 4	Petroselinum crispum	709	+	6	ATTAAT	part of a conserved DNA module involved in light responsiveness
AhDREB-31	CAT-box	Arabidopsis thaliana	865	-	6	GCCACT	cis-acting regulatory element related to meristem expression
AhDREB-31	CGTCA-motif	Hordeum vulgare	1226	-	5	CGTCA	cis-acting regulatory element involved in the MeJA-responsiveness
AhDREB-31	CGTCA-motif	Hordeum vulgare	278	+	5	CGTCA	cis-acting regulatory element involved in the MeJA-responsiveness
AhDREB-31	GT1-motif	Arabidopsis thaliana	294	+	6	GGTTAA	light responsive element
AhDREB-31	GT1-motif	Arabidopsis thaliana	1180	-	6	GGTTAA	light responsive element
AhDREB-31	TC-rich repeats	Nicotiana tabacum	947	-	10	ATTCTCTAAC	cis-acting element involved in defense and stress responsiveness
AhDREB-31	TCA-element	Nicotiana tabacum	1473	+	9	CCATCTTTTT	cis-acting element involved in salicylic acid responsiveness
AhDREB-31	TGACG-motif	Hordeum vulgare	1226	+	5	TGACG	cis-acting regulatory element involved in the MeJA-responsiveness
AhDREB-31	TGACG-motif	Hordeum vulgare	278	-	5	TGACG	cis-acting regulatory element involved in the MeJA-responsiveness
AhDREB-32	ABRE	Arabidopsis thaliana	825	-	5	ACGTG	cis-acting element involved in the abscisic acid responsiveness
AhDREB-32	AT-rich element	Glycine max	128	-	10	ATAGAAATCAA	binding site of AT-rich DNA binding protein (ATBP-1)
AhDREB-32	Box 4	Petroselinum crispum	1288	-	6	ATTAAT	part of a conserved DNA module involved in light responsiveness
AhDREB-32	Box 4	Petroselinum crispum	517	+	6	ATTAAT	part of a conserved DNA module involved in light responsiveness
AhDREB-32	Box 4	Petroselinum crispum	294	+	6	ATTAAT	part of a conserved DNA module involved in light responsiveness
AhDREB-32	Box 4	Petroselinum crispum	50	+	6	ATTAAT	part of a conserved DNA module involved in light responsiveness
AhDREB-32	Box 4	Petroselinum crispum	871	-	6	ATTAAT	part of a conserved DNA module involved in light responsiveness
AhDREB-32	CGTCA-motif	Hordeum vulgare	260	-	5	CGTCA	cis-acting regulatory element involved in the MeJA-responsiveness
AhDREB-32	CGTCA-motif	Hordeum vulgare	902	+	5	CGTCA	cis-acting regulatory element involved in the MeJA-responsiveness
AhDREB-32	CGTCA-motif	Hordeum vulgare	884	-	5	CGTCA	cis-acting regulatory element involved in the MeJA-responsiveness
AhDREB-32	G-box	Arabidopsis thaliana	825	-	6	TACGTG	cis-acting regulatory element involved in light responsiveness
AhDREB-32	GA-motif	Arabidopsis thaliana	1327	+	8	ATAGATAA	part of a light responsive element
AhDREB-32	GATA-motif	Arabidopsis thaliana	1200	+	10	AAGATAAGATT	part of a light responsive element
AhDREB-32	GT1-motif	Arabidopsis thaliana	641	-	6	GGTTAA	light responsive element
AhDREB-32	Gap-box	Arabidopsis thaliana	841	+	9	CAAATGAA(A/G)A	part of a light responsive element
AhDREB-32	TC-rich repeats	Nicotiana tabacum	1394	+	9	GTTTTCTTAC	cis-acting element involved in defense and stress responsiveness
AhDREB-32	TCA-element	Nicotiana tabacum	1467	-	9	CCATCTTTTT	cis-acting element involved in salicylic acid responsiveness
AhDREB-32	TCT-motif	Arabidopsis thaliana	1398	+	6	TCTTAC	part of a light responsive element
AhDREB-32	TCT-motif	Arabidopsis thaliana	149	-	6	TCTTAC	part of a light responsive element
AhDREB-32	TGA-element	Brassica oleracea	468	+	6	AACGAC	auxin-responsive element
AhDREB-32	TGACG-motif	Hordeum vulgare	902	-	5	TGACG	cis-acting regulatory element involved in the MeJA-responsiveness
AhDREB-32	TGACG-motif	Hordeum vulgare	884	+	5	TGACG	cis-acting regulatory element involved in the MeJA-responsiveness
AhDREB-32	TGACG-motif	Hordeum vulgare	260	+	5	TGACG	cis-acting regulatory element involved in the MeJA-responsiveness
AhDREB-33	A-box	Oryza sativa	1290	-	12	AATAACAAACTCC	sequence conserved in alpha-amylase promoters
AhDREB-33	ABRE	Arabidopsis thaliana	228	-	5	ACGTG	cis-acting element involved in the abscisic acid responsiveness
AhDREB-33	ABRE	Arabidopsis thaliana	115	-	5	ACGTG	cis-acting element involved in the abscisic acid responsiveness
AhDREB-33	ARE	Zea mays	1154	-	6	AAACCA	cis-acting regulatory element essential for the anaerobic induction
AhDREB-33	ARE	Zea mays	813	+	6	AAACCA	cis-acting regulatory element essential for the anaerobic induction
AhDREB-33	ARE	Zea mays	837	-	6	AAACCA	cis-acting regulatory element essential for the anaerobic induction
AhDREB-33	ARE	Zea mays	1130	+	6	AAACCA	cis-acting regulatory element essential for the anaerobic induction
AhDREB-33	ARE	Zea mays	774	-	6	AAACCA	cis-acting regulatory element essential for the anaerobic induction
AhDREB-33	ATCT-motif	Pisum sativum	946	+	9	AATCTAATCC	part of a conserved DNA module involved in light responsiveness
AhDREB-33	Box 4	Petroselinum crispum	1445	-	6	ATTAAT	part of a conserved DNA module involved in light responsiveness
AhDREB-33	Box 4	Petroselinum crispum	1070	-	6	ATTAAT	part of a conserved DNA module involved in light responsiveness
AhDREB-33	Box 4	Petroselinum crispum	934	-	6	ATTAAT	part of a conserved DNA module involved in light responsiveness
AhDREB-33	Box 4	Petroselinum crispum	1005	-	6	ATTAAT	part of a conserved DNA module involved in light responsiveness
AhDREB-33	CAT-box	Arabidopsis thaliana	1031	+	6	GCCACT	cis-acting regulatory element related to meristem expression
AhDREB-33	CCAAT-box	Hordeum vulgare	1182	-	6	CAACGG	MYBHv1 binding site
AhDREB-33	G-Box	Pisum sativum	115	+	6	CACGTT	cis-acting regulatory element involved in light responsiveness
AhDREB-33	G-box	Arabidopsis thaliana	228	-	6	TACGTG	cis-acting regulatory element involved in light responsiveness
AhDREB-33	GATA-motif	Solanum tuberosum	461	+	9	AAGGATAAGG	part of a light responsive element
AhDREB-33	LTR	Hordeum vulgare	457	+	6	CCGAAA	cis-acting element involved in low-temperature responsiveness
AhDREB-33	MBSI	Petunia hybrida	622	+	11	aaaAaaC(G/C)GTTA	MYB binding site involved in flavonoid biosynthetic genes regulation
AhDREB-33	O2-site	Zea mays	348	+	9	GTTGACGTGA	cis-acting regulatory element involved in zein metabolism regulation
AhDREB-33	P-box	Oryza sativa	1421	-	7	CCTTTTG	gibberellin-responsive element
AhDREB-33	chs-CMA1a	Daucus carota	1350	+	8	TTACTTAA	part of a light responsive element
AhDREB-34	ARE	Zea mays	367	+	6	AAACCA	cis-acting regulatory element essential for the anaerobic induction
AhDREB-34	ATC-motif	Spinacia oleracea	856	-	8	AGTAATCT	part of a conserved DNA module involved in light responsiveness
AhDREB-34	Box 4	Petroselinum crispum	1191	-	6	ATTAAT	part of a conserved DNA module involved in light responsiveness
AhDREB-34	Box 4	Petroselinum crispum	883	-	6	ATTAAT	part of a conserved DNA module involved in light responsiveness
AhDREB-34	Box 4	Petroselinum crispum	1289	-	6	ATTAAT	part of a conserved DNA module involved in light responsiveness
AhDREB-34	Box 4	Petroselinum crispum	243	+	6	ATTAAT	part of a conserved DNA module involved in light responsiveness
AhDREB-34	Box 4	Petroselinum crispum	547	+	6	ATTAAT	part of a conserved DNA module involved in light responsiveness
AhDREB-34	Box 4	Petroselinum crispum	616	+	6	ATTAAT	part of a conserved DNA module involved in light responsiveness
AhDREB-34	CAT-box	Arabidopsis thaliana	1481	-	6	GCCACT	cis-acting regulatory element related to meristem expression
AhDREB-34	GT1-motif	Arabidopsis thaliana	147	+	6	GGTTAA	light responsive element
AhDREB-34	GT1-motif	Arabidopsis thaliana	183	+	6	GGTTAA	light responsive element
AhDREB-34	LAMP-element	Pisum sativum	1277	+	8	CTTTATCA	part of a light responsive element
AhDREB-34	O2-site	Zea mays	1032	-	9	GATGACATGG	cis-acting regulatory element involved in zein metabolism regulation
AhDREB-34	TC-rich repeats	Nicotiana tabacum	1013	+	9	GTTTTCTTAC	cis-acting element involved in defense and stress responsiveness
AhDREB-34	TCA-element	Nicotiana tabacum	299	-	9	CCATCTTTTT	cis-acting element involved in salicylic acid responsiveness
AhDREB-34	TCT-motif	Arabidopsis thaliana	929	+	6	TCTTAC	part of a light responsive element
AhDREB-35	ABRE	Arabidopsis thaliana	669	+	5	ACGTG	cis-acting element involved in the abscisic acid responsiveness
AhDREB-35	ABRE	Hordeum vulgare	666	-	9	CGCACGTGTC	cis-acting element involved in the abscisic acid responsiveness
AhDREB-35	ABRE	Arabidopsis thaliana	668	+	6	CACGTG	cis-acting element involved in the abscisic acid responsiveness
AhDREB-35	ABRE	Arabidopsis thaliana	721	-	5	ACGTG	cis-acting element involved in the abscisic acid responsiveness
AhDREB-35	ARE	Zea mays	1492	-	6	AAACCA	cis-acting regulatory element essential for the anaerobic induction
AhDREB-35	ARE	Zea mays	1050	-	6	AAACCA	cis-acting regulatory element essential for the anaerobic induction
AhDREB-35	ARE	Zea mays	581	+	6	AAACCA	cis-acting regulatory element essential for the anaerobic induction
AhDREB-35	ATCT-motif	Pisum sativum	419	-	9	AATCTAATCC	part of a conserved DNA module involved in light responsiveness
AhDREB-35	ATCT-motif	Pisum sativum	414	-	9	AATCTAATCC	part of a conserved DNA module involved in light responsiveness
AhDREB-35	Box 4	Petroselinum crispum	352	+	6	ATTAAT	part of a conserved DNA module involved in light responsiveness
AhDREB-35	Box 4	Petroselinum crispum	97	+	6	ATTAAT	part of a conserved DNA module involved in light responsiveness
AhDREB-35	CAT-box	Arabidopsis thaliana	644	-	6	GCCACT	cis-acting regulatory element related to meristem expression
AhDREB-35	CGTCA-motif	Hordeum vulgare	628	-	5	CGTCA	cis-acting regulatory element involved in the MeJA-responsiveness
AhDREB-35	CGTCA-motif	Hordeum vulgare	1023	+	5	CGTCA	cis-acting regulatory element involved in the MeJA-responsiveness
AhDREB-35	CGTCA-motif	Hordeum vulgare	723	+	5	CGTCA	cis-acting regulatory element involved in the MeJA-responsiveness
AhDREB-35	G-Box	Pisum sativum	668	+	6	CACGTG	cis-acting regulatory element involved in light responsiveness
AhDREB-35	G-box	Arabidopsis thaliana	668	+	6	CACGTG	cis-acting regulatory element involved in light responsiveness
AhDREB-35	G-box	Zea mays	721	+	6	CACGTC	cis-acting regulatory element involved in light responsiveness
AhDREB-35	GA-motif	Arabidopsis thaliana	1260	-	8	ATAGATAA	part of a light responsive element
AhDREB-35	GT1-motif	Arabidopsis thaliana	1272	+	6	GGTTAA	light responsive element
AhDREB-35	HD-Zip 3	Arabidopsis thaliana	286	+	9.5	GTAAT(G/C)ATTAC	protein binding site
AhDREB-35	TCA-element	Nicotiana tabacum	526	-	9	CCATCTTTTT	cis-acting element involved in salicylic acid responsiveness
AhDREB-35	TGA-element	Brassica oleracea	907	+	6	AACGAC	auxin-responsive element
AhDREB-35	TGA-element	Brassica oleracea	1204	-	6	AACGAC	auxin-responsive element
AhDREB-35	TGACG-motif	Hordeum vulgare	1023	-	5	TGACG	cis-acting regulatory element involved in the MeJA-responsiveness
AhDREB-35	TGACG-motif	Hordeum vulgare	723	-	5	TGACG	cis-acting regulatory element involved in the MeJA-responsiveness
AhDREB-35	TGACG-motif	Hordeum vulgare	628	+	5	TGACG	cis-acting regulatory element involved in the MeJA-responsiveness
AhDREB-36	ABRE	Arabidopsis thaliana	669	+	5	ACGTG	cis-acting element involved in the abscisic acid responsiveness
AhDREB-36	ABRE	Hordeum vulgare	666	-	9	CGCACGTGTC	cis-acting element involved in the abscisic acid responsiveness
AhDREB-36	ABRE	Arabidopsis thaliana	668	+	6	CACGTG	cis-acting element involved in the abscisic acid responsiveness
AhDREB-36	ABRE	Arabidopsis thaliana	721	-	5	ACGTG	cis-acting element involved in the abscisic acid responsiveness
AhDREB-36	ARE	Zea mays	1492	-	6	AAACCA	cis-acting regulatory element essential for the anaerobic induction
AhDREB-36	ARE	Zea mays	1050	-	6	AAACCA	cis-acting regulatory element essential for the anaerobic induction
AhDREB-36	ARE	Zea mays	581	+	6	AAACCA	cis-acting regulatory element essential for the anaerobic induction
AhDREB-36	ATCT-motif	Pisum sativum	419	-	9	AATCTAATCC	part of a conserved DNA module involved in light responsiveness
AhDREB-36	ATCT-motif	Pisum sativum	414	-	9	AATCTAATCC	part of a conserved DNA module involved in light responsiveness
AhDREB-36	Box 4	Petroselinum crispum	352	+	6	ATTAAT	part of a conserved DNA module involved in light responsiveness
AhDREB-36	Box 4	Petroselinum crispum	97	+	6	ATTAAT	part of a conserved DNA module involved in light responsiveness
AhDREB-36	CAT-box	Arabidopsis thaliana	644	-	6	GCCACT	cis-acting regulatory element related to meristem expression
AhDREB-36	CGTCA-motif	Hordeum vulgare	628	-	5	CGTCA	cis-acting regulatory element involved in the MeJA-responsiveness
AhDREB-36	CGTCA-motif	Hordeum vulgare	1023	+	5	CGTCA	cis-acting regulatory element involved in the MeJA-responsiveness
AhDREB-36	CGTCA-motif	Hordeum vulgare	723	+	5	CGTCA	cis-acting regulatory element involved in the MeJA-responsiveness
AhDREB-36	G-Box	Pisum sativum	668	+	6	CACGTG	cis-acting regulatory element involved in light responsiveness
AhDREB-36	G-box	Arabidopsis thaliana	668	+	6	CACGTG	cis-acting regulatory element involved in light responsiveness
AhDREB-36	G-box	Zea mays	721	+	6	CACGTC	cis-acting regulatory element involved in light responsiveness
AhDREB-36	GA-motif	Arabidopsis thaliana	1260	-	8	ATAGATAA	part of a light responsive element
AhDREB-36	GT1-motif	Arabidopsis thaliana	1272	+	6	GGTTAA	light responsive element
AhDREB-36	HD-Zip 3	Arabidopsis thaliana	286	+	9.5	GTAAT(G/C)ATTAC	protein binding site
AhDREB-36	TCA-element	Nicotiana tabacum	526	-	9	CCATCTTTTT	cis-acting element involved in salicylic acid responsiveness
AhDREB-36	TGA-element	Brassica oleracea	907	+	6	AACGAC	auxin-responsive element
AhDREB-36	TGA-element	Brassica oleracea	1204	-	6	AACGAC	auxin-responsive element
AhDREB-36	TGACG-motif	Hordeum vulgare	1023	-	5	TGACG	cis-acting regulatory element involved in the MeJA-responsiveness
AhDREB-36	TGACG-motif	Hordeum vulgare	723	-	5	TGACG	cis-acting regulatory element involved in the MeJA-responsiveness
AhDREB-36	TGACG-motif	Hordeum vulgare	628	+	5	TGACG	cis-acting regulatory element involved in the MeJA-responsiveness
AhDREB-36	WUN-motif	Brassica oleracea	1232	-	9	AAATTTCCT	wound-responsive element
AhDREB-37	ABRE	Arabidopsis thaliana	67	+	6	CACGTG	cis-acting element involved in the abscisic acid responsiveness
AhDREB-37	ABRE	Arabidopsis thaliana	68	+	5	ACGTG	cis-acting element involved in the abscisic acid responsiveness
AhDREB-37	AT-rich element	Glycine max	319	-	10	ATAGAAATCAA	binding site of AT-rich DNA binding protein (ATBP-1)
AhDREB-37	Box 4	Petroselinum crispum	993	-	6	ATTAAT	part of a conserved DNA module involved in light responsiveness
AhDREB-37	Box 4	Petroselinum crispum	1210	-	6	ATTAAT	part of a conserved DNA module involved in light responsiveness
AhDREB-37	Box 4	Petroselinum crispum	1160	-	6	ATTAAT	part of a conserved DNA module involved in light responsiveness
AhDREB-37	Box 4	Petroselinum crispum	1010	-	6	ATTAAT	part of a conserved DNA module involved in light responsiveness
AhDREB-37	Box 4	Petroselinum crispum	1092	-	6	ATTAAT	part of a conserved DNA module involved in light responsiveness
AhDREB-37	Box 4	Petroselinum crispum	1006	-	6	ATTAAT	part of a conserved DNA module involved in light responsiveness
AhDREB-37	Box 4	Petroselinum crispum	163	+	6	ATTAAT	part of a conserved DNA module involved in light responsiveness
AhDREB-37	Box 4	Petroselinum crispum	318	+	6	ATTAAT	part of a conserved DNA module involved in light responsiveness
AhDREB-37	CCAAT-box	Hordeum vulgare	242	-	6	CAACGG	MYBHv1 binding site
AhDREB-37	CGTCA-motif	Hordeum vulgare	230	+	5	CGTCA	cis-acting regulatory element involved in the MeJA-responsiveness
AhDREB-37	G-Box	Pisum sativum	67	+	6	CACGTG	cis-acting regulatory element involved in light responsiveness
AhDREB-37	G-Box	Pisum sativum	64	-	9	CACGTGAAA	cis-acting regulatory element involved in light responsiveness
AhDREB-37	G-box	Arabidopsis thaliana	67	+	6	CACGTG	cis-acting regulatory element involved in light responsiveness
AhDREB-37	GT1-motif	Arabidopsis thaliana	348	-	6	GGTTAA	light responsive element
AhDREB-37	GT1-motif	Arabidopsis thaliana	1291	+	6	GGTTAA	light responsive element
AhDREB-37	TC-rich repeats	Nicotiana tabacum	361	+	9	GTTTTCTTAC	cis-acting element involved in defense and stress responsiveness
AhDREB-37	TGACG-motif	Hordeum vulgare	230	-	5	TGACG	cis-acting regulatory element involved in the MeJA-responsiveness
AhDREB-38	ABRE	Arabidopsis thaliana	1344	-	5	ACGTG	cis-acting element involved in the abscisic acid responsiveness
AhDREB-38	ABRE	Arabidopsis thaliana	1183	+	5	ACGTG	cis-acting element involved in the abscisic acid responsiveness
AhDREB-38	ABRE	Arabidopsis thaliana	994	-	5	ACGTG	cis-acting element involved in the abscisic acid responsiveness
AhDREB-38	ABRE	Arabidopsis thaliana	779	-	5	ACGTG	cis-acting element involved in the abscisic acid responsiveness
AhDREB-38	ABRE	Arabidopsis thaliana	23	+	5	ACGTG	cis-acting element involved in the abscisic acid responsiveness
AhDREB-38	Box 4	Petroselinum crispum	327	+	6	ATTAAT	part of a conserved DNA module involved in light responsiveness
AhDREB-38	Box 4	Petroselinum crispum	825	-	6	ATTAAT	part of a conserved DNA module involved in light responsiveness
AhDREB-38	Box 4	Petroselinum crispum	197	+	6	ATTAAT	part of a conserved DNA module involved in light responsiveness
AhDREB-38	Box 4	Petroselinum crispum	1469	-	6	ATTAAT	part of a conserved DNA module involved in light responsiveness
AhDREB-38	Box 4	Petroselinum crispum	1487	-	6	ATTAAT	part of a conserved DNA module involved in light responsiveness
AhDREB-38	Box 4	Petroselinum crispum	218	+	6	ATTAAT	part of a conserved DNA module involved in light responsiveness
AhDREB-38	Box 4	Petroselinum crispum	398	+	6	ATTAAT	part of a conserved DNA module involved in light responsiveness
AhDREB-38	CGTCA-motif	Hordeum vulgare	738	-	5	CGTCA	cis-acting regulatory element involved in the MeJA-responsiveness
AhDREB-38	CGTCA-motif	Hordeum vulgare	1285	+	5	CGTCA	cis-acting regulatory element involved in the MeJA-responsiveness
AhDREB-38	G-Box	Pisum sativum	22	-	6	CACGTT	cis-acting regulatory element involved in light responsiveness
AhDREB-38	G-Box	Pisum sativum	1344	+	6	CACGTT	cis-acting regulatory element involved in light responsiveness
AhDREB-38	G-Box	Pisum sativum	1182	-	6	CACGTT	cis-acting regulatory element involved in light responsiveness
AhDREB-38	G-Box	Pisum sativum	779	+	6	CACGTT	cis-acting regulatory element involved in light responsiveness
AhDREB-38	G-Box	Pisum sativum	994	+	6	CACGTT	cis-acting regulatory element involved in light responsiveness
AhDREB-38	G-box	Zea mays	53	-	6	CACGAC	cis-acting regulatory element involved in light responsiveness
AhDREB-38	GATA-motif	Arabidopsis thaliana	421	+	10	AAGATAAGATT	part of a light responsive element
AhDREB-38	GT1-motif	Arabidopsis thaliana	887	-	6	GGTTAA	light responsive element
AhDREB-38	I-box	Larix laricina	58	-	9	GTATAAGGCC	part of a light responsive element
AhDREB-38	TGACG-motif	Hordeum vulgare	1285	-	5	TGACG	cis-acting regulatory element involved in the MeJA-responsiveness
AhDREB-38	TGACG-motif	Hordeum vulgare	738	+	5	TGACG	cis-acting regulatory element involved in the MeJA-responsiveness
AhDREB-39	ABRE	Arabidopsis thaliana	196	+	5	ACGTG	cis-acting element involved in the abscisic acid responsiveness
AhDREB-39	AT-rich sequence	Pisum sativum	837	+	9	TAAAATACT	element for maximal elicitor-mediated activation (2copies)
AhDREB-39	AuxRR-core	Nicotiana tabacum	742	+	7	GGTCCAT	cis-acting regulatory element involved in auxin responsiveness
AhDREB-39	AuxRR-core	Nicotiana tabacum	150	+	7	GGTCCAT	cis-acting regulatory element involved in auxin responsiveness
AhDREB-39	G-box	Arabidopsis thaliana	195	+	6	TACGTG	cis-acting regulatory element involved in light responsiveness
AhDREB-39	GATA-motif	Solanum tuberosum	1369	-	9	AAGGATAAGG	part of a light responsive element
AhDREB-39	GTGGC-motif	Spinacia oleracea	590	+	10	GATTCTGTGGC	part of a light responsive element
AhDREB-39	Gap-box	Arabidopsis thaliana	71	-	9	CAAATGAA(A/G)A	part of a light responsive element
AhDREB-39	LTR	Hordeum vulgare	1436	-	6	CCGAAA	cis-acting element involved in low-temperature responsiveness
AhDREB-39	LTR	Hordeum vulgare	1426	-	6	CCGAAA	cis-acting element involved in low-temperature responsiveness
AhDREB-39	LTR	Hordeum vulgare	923	+	6	CCGAAA	cis-acting element involved in low-temperature responsiveness
AhDREB-39	MBS	Arabidopsis thaliana	630	-	6	CAACTG	MYB binding site involved in drought-inducibility
AhDREB-39	TC-rich repeats	Nicotiana tabacum	1104	+	9	ATTCTCTAAC	cis-acting element involved in defense and stress responsiveness
AhDREB-39	TCT-motif	Arabidopsis thaliana	242	-	6	TCTTAC	part of a light responsive element
AhDREB-39	chs-CMA2b	Hordeum vulgare	880	+	11	GAACCTACACAC	part of a light responsive element
AhDREB-39	chs-Unit 1 m1	Hordeum vulgare	314	-	10	ACCTAACCCGC	part of a light responsive element
AhDREB-40	ARE	Zea mays	1474	+	6	AAACCA	cis-acting regulatory element essential for the anaerobic induction
AhDREB-40	ARE	Zea mays	1244	+	6	AAACCA	cis-acting regulatory element essential for the anaerobic induction
AhDREB-40	ARE	Zea mays	1360	-	6	AAACCA	cis-acting regulatory element essential for the anaerobic induction
AhDREB-40	Box 4	Petroselinum crispum	382	+	6	ATTAAT	part of a conserved DNA module involved in light responsiveness
AhDREB-40	Box 4	Petroselinum crispum	609	+	6	ATTAAT	part of a conserved DNA module involved in light responsiveness
AhDREB-40	Box 4	Petroselinum crispum	838	-	6	ATTAAT	part of a conserved DNA module involved in light responsiveness
AhDREB-40	CGTCA-motif	Hordeum vulgare	1493	+	5	CGTCA	cis-acting regulatory element involved in the MeJA-responsiveness
AhDREB-40	GATA-motif	Arabidopsis thaliana	538	+	10	AAGATAAGATT	part of a light responsive element
AhDREB-40	GCN4_motif	Oryza sativa	749	+	7	TGAGTCA	cis-regulatory element involved in endosperm expression
AhDREB-40	GT1-motif	Avena sativa	1318	+	7	GGTTAAT	light responsive element
AhDREB-40	HD-Zip 1	Arabidopsis thaliana	754	-	8.5	CAAT(A/T)ATTG	element involved in differentiation of the palisade mesophyll cells
AhDREB-40	HD-Zip 3	Arabidopsis thaliana	811	-	9.5	GTAAT(G/C)ATTAC	protein binding site
AhDREB-40	MRE	Petroselinum crispum	1315	-	7	AACCTAA	MYB binding site involved in light responsiveness
AhDREB-40	TCA-element	Nicotiana tabacum	1098	-	9	CCATCTTTTT	cis-acting element involved in salicylic acid responsiveness
AhDREB-40	TGACG-motif	Hordeum vulgare	1493	-	5	TGACG	cis-acting regulatory element involved in the MeJA-responsiveness
AhDREB-40	circadian	Lycopersicon esculentum	707	-	9	CAAAGATATC	cis-acting regulatory element involved in circadian control
AhDREB-41	3-AF1 binding site	Solanum tuberosum	933	+	10	TAAGAGAGGAA	light responsive element
AhDREB-41	ABRE	Arabidopsis thaliana	1186	+	5	ACGTG	cis-acting element involved in the abscisic acid responsiveness
AhDREB-41	ABRE	Arabidopsis thaliana	1185	-	6	CACGTG	cis-acting element involved in the abscisic acid responsiveness
AhDREB-41	ACE	Petroselinum crispum	489	-	9	CTAACGTATT	cis-acting element involved in light responsiveness
AhDREB-41	Box 4	Petroselinum crispum	783	-	6	ATTAAT	part of a conserved DNA module involved in light responsiveness
AhDREB-41	Box 4	Petroselinum crispum	1019	-	6	ATTAAT	part of a conserved DNA module involved in light responsiveness
AhDREB-41	Box 4	Petroselinum crispum	593	+	6	ATTAAT	part of a conserved DNA module involved in light responsiveness
AhDREB-41	Box 4	Petroselinum crispum	1031	-	6	ATTAAT	part of a conserved DNA module involved in light responsiveness
AhDREB-41	Box 4	Petroselinum crispum	605	+	6	ATTAAT	part of a conserved DNA module involved in light responsiveness
AhDREB-41	Box 4	Petroselinum crispum	969	-	6	ATTAAT	part of a conserved DNA module involved in light responsiveness
AhDREB-41	CGTCA-motif	Hordeum vulgare	272	+	5	CGTCA	cis-acting regulatory element involved in the MeJA-responsiveness
AhDREB-41	G-Box	Pisum sativum	1185	-	6	CACGTG	cis-acting regulatory element involved in light responsiveness
AhDREB-41	G-box	Arabidopsis thaliana	1185	-	6	CACGTG	cis-acting regulatory element involved in light responsiveness
AhDREB-41	GATA-motif	Solanum tuberosum	1389	-	9	AAGGATAAGG	part of a light responsive element
AhDREB-41	GCN4_motif	Oryza sativa	104	-	7	TGAGTCA	cis-regulatory element involved in endosperm expression
AhDREB-41	GT1-motif	Arabidopsis thaliana	1357	+	6	GGTTAA	light responsive element
AhDREB-41	GT1-motif	Arabidopsis thaliana	676	-	6	GGTTAA	light responsive element
AhDREB-41	MBS	Arabidopsis thaliana	287	+	6	CAACTG	MYB binding site involved in drought-inducibility
AhDREB-41	MBSI	Petunia hybrida	677	-	11	TTTTTACGGTTA	MYB binding site involved in flavonoid biosynthetic genes regulation
AhDREB-41	O2-site	Zea mays	37	+	9	GATGATGTGG	cis-acting regulatory element involved in zein metabolism regulation
AhDREB-41	TC-rich repeats	Nicotiana tabacum	1210	-	9	ATTCTCTAAC	cis-acting element involved in defense and stress responsiveness
AhDREB-41	TCCC-motif	Spinacia oleracea	378	-	7	TCTCCCT	part of a light responsive element
AhDREB-41	TGA-box	Glycine max	269	-	8	TGACGTAA	part of an auxin-responsive element
AhDREB-41	TGACG-motif	Hordeum vulgare	272	-	5	TGACG	cis-acting regulatory element involved in the MeJA-responsiveness
AhERF-1	3-AF1 binding site	Solanum tuberosum	24	+	10	TAAGAGAGGAA	light responsive element
AhERF-1	ARE	Zea mays	663	-	6	AAACCA	cis-acting regulatory element essential for the anaerobic induction
AhERF-1	ARE	Zea mays	256	-	6	AAACCA	cis-acting regulatory element essential for the anaerobic induction
AhERF-1	ATC-motif	Spinacia oleracea	1320	+	8	AGTAATCT	part of a conserved DNA module involved in light responsiveness
AhERF-1	ATCT-motif	Pisum sativum	1445	-	9	AATCTAATCC	part of a conserved DNA module involved in light responsiveness
AhERF-1	Box 4	Petroselinum crispum	872	-	6	ATTAAT	part of a conserved DNA module involved in light responsiveness
AhERF-1	Box 4	Petroselinum crispum	865	-	6	ATTAAT	part of a conserved DNA module involved in light responsiveness
AhERF-1	GATA-motif	Pisum sativum	616	+	7	GATAGGG	part of a light responsive element
AhERF-1	GCN4_motif	Oryza sativa	555	-	7	TGAGTCA	cis-regulatory element involved in endosperm expression
AhERF-1	GT1-motif	Arabidopsis thaliana	1334	+	6	GGTTAA	light responsive element
AhERF-1	MRE	Petroselinum crispum	1331	-	7	AACCTAA	MYB binding site involved in light responsiveness
AhERF-1	TC-rich repeats	Nicotiana tabacum	592	+	9	ATTCTCTAAC	cis-acting element involved in defense and stress responsiveness
AhERF-1	TCA-element	Nicotiana tabacum	611	-	9	CCATCTTTTT	cis-acting element involved in salicylic acid responsiveness
AhERF-1	TCA-element	Nicotiana tabacum	166	-	9	CCATCTTTTT	cis-acting element involved in salicylic acid responsiveness
AhERF-1	TCCC-motif	Spinacia oleracea	1124	-	7	TCTCCCT	part of a light responsive element
AhERF-1	TCT-motif	Arabidopsis thaliana	596	+	6	TCTTAC	part of a light responsive element
AhERF-1	chs-CMA1a	Daucus carota	1049	-	8	TTACTTAA	part of a light responsive element
AhERF-2	ABRE	Arabidopsis thaliana	161	-	5	ACGTG	cis-acting element involved in the abscisic acid responsiveness
AhERF-2	ABRE	Arabidopsis thaliana	588	+	5	ACGTG	cis-acting element involved in the abscisic acid responsiveness
AhERF-2	AE-box	Arabidopsis thaliana	136	-	8	AGAAACTT	part of a module for light response
AhERF-2	ARE	Zea mays	668	+	6	AAACCA	cis-acting regulatory element essential for the anaerobic induction
AhERF-2	AT1-motif	Solanum tuberosum	424	-	14	AATTATTTTTTATT	part of a light responsive module
AhERF-2	Box 4	Petroselinum crispum	248	+	6	ATTAAT	part of a conserved DNA module involved in light responsiveness
AhERF-2	Box 4	Petroselinum crispum	387	+	6	ATTAAT	part of a conserved DNA module involved in light responsiveness
AhERF-2	Box 4	Petroselinum crispum	252	+	6	ATTAAT	part of a conserved DNA module involved in light responsiveness
AhERF-2	CGTCA-motif	Hordeum vulgare	19	-	5	CGTCA	cis-acting regulatory element involved in the MeJA-responsiveness
AhERF-2	CGTCA-motif	Hordeum vulgare	508	+	5	CGTCA	cis-acting regulatory element involved in the MeJA-responsiveness
AhERF-2	G-Box	Pisum sativum	587	-	6	CACGTT	cis-acting regulatory element involved in light responsiveness
AhERF-2	G-box	Zea mays	161	+	6	CACGTC	cis-acting regulatory element involved in light responsiveness
AhERF-2	GATA-motif	Arabidopsis thaliana	1052	-	7	GATAGGA	part of a light responsive element
AhERF-2	GATA-motif	Arabidopsis thaliana	1402	-	7	GATAGGA	part of a light responsive element
AhERF-2	GT1-motif	Avena sativa	1230	-	7	GGTTAAT	light responsive element
AhERF-2	GT1-motif	Arabidopsis thaliana	1231	-	6	GGTTAA	light responsive element
AhERF-2	GT1-motif	Solanum tuberosum	26	+	9	GTGTGTGAA	light responsive element
AhERF-2	I-box	Zea mays	931	-	9	gGATAAGGTG	part of a light responsive element
AhERF-2	LTR	Hordeum vulgare	574	+	6	CCGAAA	cis-acting element involved in low-temperature responsiveness
AhERF-2	O2-site	Zea mays	1015	+	9	GATGACATGG	cis-acting regulatory element involved in zein metabolism regulation
AhERF-2	TATC-box	Oryza sativa	1318	-	7	TATCCCA	cis-acting element involved in gibberellin-responsiveness
AhERF-2	TATC-box	Oryza sativa	1055	+	7	TATCCCA	cis-acting element involved in gibberellin-responsiveness
AhERF-2	TC-rich repeats	Nicotiana tabacum	1462	+	9	ATTCTCTAAC	cis-acting element involved in defense and stress responsiveness
AhERF-2	TCA-element	Nicotiana tabacum	64	-	9	CCATCTTTTT	cis-acting element involved in salicylic acid responsiveness
AhERF-2	TGACG-motif	Hordeum vulgare	19	+	5	TGACG	cis-acting regulatory element involved in the MeJA-responsiveness
AhERF-2	TGACG-motif	Hordeum vulgare	508	-	5	TGACG	cis-acting regulatory element involved in the MeJA-responsiveness
AhERF-2	chs-CMA1a	Daucus carota	737	+	8	TTACTTAA	part of a light responsive element
AhERF-2	chs-CMA2a	Petroselinum crispum	750	+	8	TCACTTGA	part of a light responsive element
AhERF-3	3-AF1 binding site	Solanum tuberosum	1479	-	10	TAAGAGAGGAA	light responsive element
AhERF-3	ABRE	Oryza sativa	75	-	9	GCCGCGTGGC	cis-acting element involved in the abscisic acid responsiveness
AhERF-3	ABRE	Arabidopsis thaliana	1393	-	5	ACGTG	cis-acting element involved in the abscisic acid responsiveness
AhERF-3	AE-box	Arabidopsis thaliana	405	-	8	AGAAACAA	part of a module for light response
AhERF-3	AT-rich sequence	Pisum sativum	610	+	9	TAAAATACT	element for maximal elicitor-mediated activation (2copies)
AhERF-3	Box 4	Petroselinum crispum	249	+	6	ATTAAT	part of a conserved DNA module involved in light responsiveness
AhERF-3	Box 4	Petroselinum crispum	104	+	6	ATTAAT	part of a conserved DNA module involved in light responsiveness
AhERF-3	Box 4	Petroselinum crispum	999	-	6	ATTAAT	part of a conserved DNA module involved in light responsiveness
AhERF-3	Box 4	Petroselinum crispum	1049	-	6	ATTAAT	part of a conserved DNA module involved in light responsiveness
AhERF-3	Box 4	Petroselinum crispum	1269	-	6	ATTAAT	part of a conserved DNA module involved in light responsiveness
AhERF-3	Box 4	Petroselinum crispum	795	-	6	ATTAAT	part of a conserved DNA module involved in light responsiveness
AhERF-3	Box 4	Petroselinum crispum	844	-	6	ATTAAT	part of a conserved DNA module involved
AhERF-3	CGTCA-motif	Hordeum vulgare	1407	+	5	CGTCA	cis-acting regulatory element involved in the MeJA-responsiveness
AhERF-3	G-Box	Pisum sativum	1393	+	6	CACGTT	cis-acting regulatory element involved in light responsiveness
AhERF-3	GATA-motif	Solanum tuberosum	1421	+	9	AAGGATAAGG	part of a light responsive element
AhERF-3	GT1-motif	Arabidopsis thaliana	1104	+	6	GGTTAA	light responsive element
AhERF-3	LTR	Hordeum vulgare	62	+	6	CCGAAA	cis-acting element involved in low-temperature responsiveness
AhERF-3	MBS	Arabidopsis thaliana	1247	+	6	CAACTG	MYB binding site involved in drought-inducibility
AhERF-3	MRE	Petroselinum crispum	736	-	7	AACCTAA	MYB binding site involved in light responsiveness
AhERF-3	O2-site	Zea mays	49	-	9	GATGACATGG	cis-acting regulatory element involved in zein metabolism regulation
AhERF-3	TC-rich repeats	Nicotiana tabacum	137	+	9	GTTTTCTTAC	cis-acting element involved in defense and stress responsiveness
AhERF-3	TCT-motif	Arabidopsis thaliana	141	+	6	TCTTAC	part of a light responsive element
AhERF-3	TGACG-motif	Hordeum vulgare	1407	-	5	TGACG	cis-acting regulatory element involved in the MeJA-responsiveness
AhERF-3	circadian	Lycopersicon esculentum	1126	-	9	CAAAGATATC	cis-acting regulatory element involved in circadian control
AhERF-3	circadian	Lycopersicon esculentum	1122	+	9	CAAAGATATC	cis-acting regulatory element involved in circadian control
AhERF-3	circadian	Lycopersicon esculentum	1152	-	9	CAAAGATATC	cis-acting regulatory element involved in circadian control
AhERF-4	ABRE	Arabidopsis thaliana	366	+	5	ACGTG	cis-acting element involved in the abscisic acid responsiveness
AhERF-4	ABRE	Arabidopsis thaliana	333	+	6	CACGTG	cis-acting element involved in the abscisic acid responsiveness
AhERF-4	ABRE	Arabidopsis thaliana	334	+	5	ACGTG	cis-acting element involved in the abscisic acid responsiveness
AhERF-4	ABRE	Arabidopsis thaliana	365	+	6	CACGTG	cis-acting element involved in the abscisic acid responsiveness
AhERF-4	ARE	Zea mays	1370	+	6	AAACCA	cis-acting regulatory element essential for the anaerobic induction
AhERF-4	ARE	Zea mays	1440	+	6	AAACCA	cis-acting regulatory element essential for the anaerobic induction
AhERF-4	AT1-motif	Solanum tuberosum	802	+	13	AATTATTTTTTATT	part of a light responsive module
AhERF-4	Box 4	Petroselinum crispum	223	+	6	ATTAAT	part of a conserved DNA module involved in light responsiveness
AhERF-4	Box 4	Petroselinum crispum	124	+	6	ATTAAT	part of a conserved DNA module involved in light responsiveness
AhERF-4	Box 4	Petroselinum crispum	90	+	6	ATTAAT	part of a conserved DNA module involved in light responsiveness
AhERF-4	Box 4	Petroselinum crispum	998	-	6	ATTAAT	part of a conserved DNA module involved in light responsiveness
AhERF-4	Box 4	Petroselinum crispum	1390	-	6	ATTAAT	part of a conserved DNA module involved in light responsiveness
AhERF-4	Box 4	Petroselinum crispum	586	+	6	ATTAAT	part of a conserved DNA module involved in light responsiveness
AhERF-4	Box II -like sequence	Oryza sativa	207	-	11	TCCGTGTACCA	cis-acting regulatory element
AhERF-4	G-Box	Pisum sativum	365	+	6	CACGTG	cis-acting regulatory element involved in light responsiveness
AhERF-4	G-Box	Pisum sativum	333	+	6	CACGTG	cis-acting regulatory element involved in light responsiveness
AhERF-4	G-box	Arabidopsis thaliana	333	+	6	CACGTG	cis-acting regulatory element involved in light responsiveness
AhERF-4	G-box	Arabidopsis thaliana	365	+	6	CACGTG	cis-acting regulatory element involved in light responsiveness
AhERF-4	GATA-motif	Arabidopsis thaliana	634	+	10	AAGATAAGATT	part of a light responsive element
AhERF-4	GCN4_motif	Oryza sativa	606	-	7	TGAGTCA	cis-regulatory element involved in endosperm expression
AhERF-4	GT1-motif	Arabidopsis thaliana	429	+	6	GGTTAA	light responsive element
AhERF-4	TCA-element	Nicotiana tabacum	1260	-	9	CCATCTTTTT	cis-acting element involved in salicylic acid responsiveness
AhERF-4	TCA-element	Nicotiana tabacum	969	+	9	CCATCTTTTT	cis-acting element involved in salicylic acid responsiveness
AhERF-4	TCT-motif	Arabidopsis thaliana	477	-	6	TCTTAC	part of a light responsive element
AhERF-5	ABRE	Arabidopsis thaliana	1221	+	5	ACGTG	cis-acting element involved in the abscisic acid responsiveness
AhERF-5	ABRE	Arabidopsis thaliana	708	+	5	ACGTG	cis-acting element involved in the abscisic acid responsiveness
AhERF-5	ABRE	Arabidopsis thaliana	1220	-	6	CACGTG	cis-acting element involved in the abscisic acid responsiveness
AhERF-5	ABRE	Arabidopsis thaliana	311	-	7	AACCCGG	cis-acting element involved in the abscisic acid responsiveness
AhERF-5	ACE	Petroselinum crispum	1046	-	9	CTAACGTATT	cis-acting element involved in light responsiveness
AhERF-5	AE-box	Arabidopsis thaliana	1391	+	8	AGAAACAA	part of a module for light response
AhERF-5	ARE	Zea mays	85	-	6	AAACCA	cis-acting regulatory element essential for the anaerobic induction
AhERF-5	Box 4	Petroselinum crispum	760	-	6	ATTAAT	part of a conserved DNA module involved in light responsiveness
AhERF-5	CAT-box	Arabidopsis thaliana	597	-	6	GCCACT	cis-acting regulatory element related to meristem expression
AhERF-5	G-Box	Pisum sativum	1220	-	6	CACGTG	cis-acting regulatory element involved in light responsiveness
AhERF-5	G-Box	Pisum sativum	707	-	6	CACGTT	cis-acting regulatory element involved in light responsiveness
AhERF-5	G-box	Arabidopsis thaliana	1220	-	6	CACGTG	cis-acting regulatory element involved in light responsiveness
AhERF-5	GA-motif	Arabidopsis thaliana	631	-	8	ATAGATAA	part of a light responsive element
AhERF-5	MBS	Arabidopsis thaliana	75	+	6	CAACTG	MYB binding site involved in drought-inducibility
AhERF-5	MBS	Arabidopsis thaliana	1127	-	6	CAACTG	MYB binding site involved in drought-inducibility
AhERF-5	TCA-element	Nicotiana tabacum	442	+	9	CCATCTTTTT	cis-acting element involved in salicylic acid responsiveness
AhERF-5	chs-CMA1a	Daucus carota	905	+	8	TTACTTAA	part of a light responsive element
AhERF-6	A-box	Petroselinum crispum	1153	-	6	CCGTCC	cis-acting regulatory element
AhERF-6	ABRE	Arabidopsis thaliana	1108	+	5	ACGTG	cis-acting element involved in the abscisic acid responsiveness
AhERF-6	Box 4	Petroselinum crispum	456	+	6	ATTAAT	part of a conserved DNA module involved in light responsiveness
AhERF-6	Box 4	Petroselinum crispum	107	+	6	ATTAAT	part of a conserved DNA module involved in light responsiveness
AhERF-6	Box 4	Petroselinum crispum	252	+	6	ATTAAT	part of a conserved DNA module involved in light responsiveness
AhERF-6	Box 4	Petroselinum crispum	1213	-	6	ATTAAT	part of a conserved DNA module involved in light responsiveness
AhERF-6	Box 4	Petroselinum crispum	753	-	6	ATTAAT	part of a conserved DNA module involved in light responsiveness
AhERF-6	Box 4	Petroselinum crispum	343	+	6	ATTAAT	part of a conserved DNA module involved in light responsiveness
AhERF-6	CGTCA-motif	Hordeum vulgare	535	-	5	CGTCA	cis-acting regulatory element involved in the MeJA-responsiveness
AhERF-6	G-Box	Pisum sativum	1107	-	6	CACGTT	cis-acting regulatory element involved in light responsiveness
AhERF-6	GATA-motif	Pisum sativum	1050	-	7	GATAGGG	part of a light responsive element
AhERF-6	GT1-motif	Arabidopsis thaliana	745	-	6	GGTTAA	light responsive element
AhERF-6	I-box	Flaveria trinervia	1050	+	10	cCATATCCAAT	part of a light responsive element
AhERF-6	LTR	Hordeum vulgare	953	+	6	CCGAAA	cis-acting element involved in low-temperature responsiveness
AhERF-6	RY-element	Helianthus annuus	90	+	8	CATGCATG	cis-acting regulatory element involved in seed-specific regulation
AhERF-6	TCA-element	Nicotiana tabacum	817	-	9	CCATCTTTTT	cis-acting element involved in salicylic acid responsiveness
AhERF-6	TCT-motif	Arabidopsis thaliana	1346	-	6	TCTTAC	part of a light responsive element
AhERF-6	TGACG-motif	Hordeum vulgare	535	+	5	TGACG	cis-acting regulatory element involved in the MeJA-responsiveness
AhERF-6	chs-CMA2a	Petroselinum crispum	260	-	8	TCACTTGA	part of a light responsive element
AhERF-7	A-box	Oryza sativa	1395	+	12	AATAACAAACTCC	sequence conserved in alpha-amylase promoters
AhERF-7	AACA_motif	Oryza sativa	1397	+	11	TAACAAACTCCA	involved in endosperm-specific negative expression
AhERF-7	ABRE	Arabidopsis thaliana	110	+	6	CACGTG	cis-acting element involved in the abscisic acid responsiveness
AhERF-7	ABRE	Arabidopsis thaliana	111	+	5	ACGTG	cis-acting element involved in the abscisic acid responsiveness
AhERF-7	AE-box	Arabidopsis thaliana	537	-	8	AGAAACTT	part of a module for light response
AhERF-7	ARE	Zea mays	230	+	6	AAACCA	cis-acting regulatory element essential for the anaerobic induction
AhERF-7	ARE	Zea mays	1431	+	6	AAACCA	cis-acting regulatory element essential for the anaerobic induction
AhERF-7	ARE	Zea mays	508	+	6	AAACCA	cis-acting regulatory element essential for the anaerobic induction
AhERF-7	ARE	Zea mays	459	-	6	AAACCA	cis-acting regulatory element essential for the anaerobic induction
AhERF-7	AT-rich element	Glycine max	1115	-	10	ATAGAAATCAA	binding site of AT-rich DNA binding protein (ATBP-1)
AhERF-7	Box 4	Petroselinum crispum	91	+	6	ATTAAT	part of a conserved DNA module involved in light responsiveness
AhERF-7	Box 4	Petroselinum crispum	1392	-	6	ATTAAT	part of a conserved DNA module involved in light responsiveness
AhERF-7	Box 4	Petroselinum crispum	1380	-	6	ATTAAT	part of a conserved DNA module involved in light responsiveness
AhERF-7	Box 4	Petroselinum crispum	1055	-	6	ATTAAT	part of a conserved DNA module involved in light responsiveness
AhERF-7	Box 4	Petroselinum crispum	1059	-	6	ATTAAT	part of a conserved DNA module involved in light responsiveness
AhERF-7	Box 4	Petroselinum crispum	1038	-	6	ATTAAT	part of a conserved DNA module involved in light responsiveness
AhERF-7	Box 4	Petroselinum crispum	797	-	6	ATTAAT	part of a conserved DNA module involved in light responsiveness
AhERF-7	Box 4	Petroselinum crispum	1365	-	6	ATTAAT	part of a conserved DNA module involved in light responsiveness
AhERF-7	CAT-box	Arabidopsis thaliana	240	-	6	GCCACT	cis-acting regulatory element related to meristem expression
AhERF-7	CAT-box	Arabidopsis thaliana	1441	-	6	GCCACT	cis-acting regulatory element related to meristem expression
AhERF-7	CCAAT-box	Hordeum vulgare	554	+	6	CAACGG	MYBHv1 binding site
AhERF-7	G-Box	Pisum sativum	110	+	6	CACGTG	cis-acting regulatory element involved in light responsiveness
AhERF-7	G-box	Arabidopsis thaliana	110	+	6	CACGTG	cis-acting regulatory element involved in light responsiveness
AhERF-7	RY-element	Helianthus annuus	1333	-	8	CATGCATG	cis-acting regulatory element involved in seed-specific regulation
AhERF-7	TCT-motif	Arabidopsis thaliana	188	-	6	TCTTAC	part of a light responsive element
AhERF-8	A-box	Petroselinum crispum	191	-	6	CCGTCC	cis-acting regulatory element
AhERF-8	ABRE	Arabidopsis thaliana	1183	-	5	ACGTG	cis-acting element involved in the abscisic acid responsiveness
AhERF-8	ABRE	Hordeum vulgare	1181	-	9	GCAACGTGTC	cis-acting element involved in the abscisic acid responsiveness
AhERF-8	ABRE	Arabidopsis thaliana	482	+	5	ACGTG	cis-acting element involved in the abscisic acid responsiveness
AhERF-8	AE-box	Arabidopsis thaliana	703	-	8	AGAAACAA	part of a module for light response
AhERF-8	AT1-motif	Solanum tuberosum	1027	+	13	AATTATTTTTTATT	part of a light responsive module
AhERF-8	Box 4	Petroselinum crispum	1074	-	6	ATTAAT	part of a conserved DNA module involved in light responsiveness
AhERF-8	G-Box	Pisum sativum	1183	+	6	CACGTT	cis-acting regulatory element involved in light responsiveness
AhERF-8	G-Box	Pisum sativum	481	-	6	CACGTT	cis-acting regulatory element involved in light responsiveness
AhERF-8	GATA-motif	Solanum tuberosum	1207	+	10	AAGGATAAGG	part of a light responsive element
AhERF-8	I-box	Arabidopsis thaliana	1208	-	9	ccttatcct	part of a light responsive element
AhERF-8	LTR	Hordeum vulgare	57	+	6	CCGAAA	cis-acting element involved in low-temperature responsiveness
AhERF-8	LTR	Hordeum vulgare	176	+	6	CCGAAA	cis-acting element involved in low-temperature responsiveness
AhERF-8	LTR	Hordeum vulgare	776	-	6	CCGAAA	cis-acting element involved in low-temperature responsiveness
AhERF-8	O2-site	Zea mays	358	+	9	GATGATGTGG	cis-acting regulatory element involved in zein metabolism regulation
AhERF-8	TC-rich repeats	Nicotiana tabacum	102	-	9	ATTCTCTAAC	cis-acting element involved in defense and stress responsiveness
AhERF-8	TCA-element	Nicotiana tabacum	839	+	9	CCATCTTTTT	cis-acting element involved in salicylic acid responsiveness
AhERF-8	TCA-element	Nicotiana tabacum	578	+	9	CCATCTTTTT	cis-acting element involved in salicylic acid responsiveness
AhERF-8	TCT-motif	Arabidopsis thaliana	1310	-	6	TCTTAC	part of a light responsive element
AhERF-8	TCT-motif	Arabidopsis thaliana	674	+	6	TCTTAC	part of a light responsive element
AhERF-8	TGA-element	Brassica oleracea	223	+	6	AACGAC	auxin-responsive element
AhERF-9	A-box	Petroselinum crispum	172	-	6	CCGTCC	cis-acting regulatory element
AhERF-9	ABRE	Arabidopsis thaliana	321	-	5	ACGTG	cis-acting element involved in the abscisic acid responsiveness
AhERF-9	ABRE	Arabidopsis thaliana	808	+	5	ACGTG	cis-acting element involved in the abscisic acid responsiveness
AhERF-9	ABRE	Arabidopsis thaliana	490	-	5	ACGTG	cis-acting element involved in the abscisic acid responsiveness
AhERF-9	ARE	Zea mays	1455	+	6	AAACCA	cis-acting regulatory element essential for the anaerobic induction
AhERF-9	ARE	Zea mays	520	+	6	AAACCA	cis-acting regulatory element essential for the anaerobic induction
AhERF-9	ATC-motif	Spinacia oleracea	555	+	8	AGTAATCT	part of a conserved DNA module involved in light responsiveness
AhERF-9	ATCT-motif	Pisum sativum	955	+	9	AATCTAATCC	part of a conserved DNA module involved in light responsiveness
AhERF-9	ATCT-motif	Pisum sativum	558	+	9	AATCTAATCC	part of a conserved DNA module involved in light responsiveness
AhERF-9	Box 4	Petroselinum crispum	664	+	6	ATTAAT	part of a conserved DNA module involved in light responsiveness
AhERF-9	G-Box	Pisum sativum	807	-	6	CACGTT	cis-acting regulatory element involved in light responsiveness
AhERF-9	G-box	Zea mays	321	+	6	CACGTC	cis-acting regulatory element involved in light responsiveness
AhERF-9	G-box	Arabidopsis thaliana	490	-	6	TACGTG	cis-acting regulatory element involved in light responsiveness
AhERF-9	GATA-motif	Arabidopsis thaliana	432	+	7	GATAGGA	part of a light responsive element
AhERF-9	GC-motif	Zea mays	96	+	6	CCCCCG	enhancer-like element involved in anoxic specific inducibility
AhERF-9	GT1-motif	Avena sativa	1279	+	7	GGTTAAT	light responsive element
AhERF-9	O2-site	Zea mays	17	-	9	GATGACATGG	cis-acting regulatory element involved in zein metabolism regulation
AhERF-9	O2-site	Zea mays	239	-	9	GATGACATGG	cis-acting regulatory element involved in zein metabolism regulation
AhERF-9	TCT-motif	Arabidopsis thaliana	76	-	6	TCTTAC	part of a light responsive element
AhERF-10	A-box	Petroselinum crispum	1188	-	6	CCGTCC	cis-acting regulatory element
AhERF-10	ABRE	Arabidopsis thaliana	1337	-	5	ACGTG	cis-acting element involved in the abscisic acid responsiveness
AhERF-10	ARE	Zea mays	388	-	6	AAACCA	cis-acting regulatory element essential for the anaerobic induction
AhERF-10	AuxRR-core	Nicotiana tabacum	1004	+	7	GGTCCAT	cis-acting regulatory element involved in auxin responsiveness
AhERF-10	Box 4	Petroselinum crispum	542	+	6	ATTAAT	part of a conserved DNA module involved in light responsiveness
AhERF-10	CGTCA-motif	Hordeum vulgare	947	+	5	CGTCA	cis-acting regulatory element involved in the MeJA-responsiveness
AhERF-10	CGTCA-motif	Hordeum vulgare	354	-	5	CGTCA	cis-acting regulatory element involved in the MeJA-responsiveness
AhERF-10	G-box	Zea mays	1337	+	6	CACGTC	cis-acting regulatory element involved in light responsiveness
AhERF-10	G-box	Zea mays	514	+	6	CACGAC	cis-acting regulatory element involved in light responsiveness
AhERF-10	GATA-motif	Solanum tuberosum	908	-	9	AAGGATAAGG	part of a light responsive element
AhERF-10	GATA-motif	Arabidopsis thaliana	1448	+	7	GATAGGA	part of a light responsive element
AhERF-10	GC-motif	Zea mays	1112	+	6	CCCCCG	enhancer-like element involved in anoxic specific inducibility
AhERF-10	I-box	Zea mays	906	-	9	gGATAAGGTG	part of a light responsive element
AhERF-10	O2-site	Zea mays	1255	-	9	GATGACATGG	cis-acting regulatory element involved in zein metabolism regulation
AhERF-10	O2-site	Zea mays	1033	-	9	GATGACATGG	cis-acting regulatory element involved in zein metabolism regulation
AhERF-10	Sp1	Oryza sativa	1115	-	6	GGGCGG	light responsive element
AhERF-10	TATC-box	Oryza sativa	868	+	7	TATCCCA	cis-acting element involved in gibberellin-responsiveness
AhERF-10	TCT-motif	Arabidopsis thaliana	1092	-	6	TCTTAC	part of a light responsive element
AhERF-10	TGACG-motif	Hordeum vulgare	354	+	5	TGACG	cis-acting regulatory element involved in the MeJA-responsiveness
AhERF-10	TGACG-motif	Hordeum vulgare	947	-	5	TGACG	cis-acting regulatory element involved in the MeJA-responsiveness
AhERF-10	circadian	Lycopersicon esculentum	532	+	9	CAAAGATATC	cis-acting regulatory element involved in circadian control
AhERF-11	Box 4	Petroselinum crispum	1199	-	6	ATTAAT	part of a conserved DNA module involved in light responsiveness
AhERF-11	Box 4	Petroselinum crispum	378	+	6	ATTAAT	part of a conserved DNA module involved in light responsiveness
AhERF-11	CAT-box	Arabidopsis thaliana	957	-	6	GCCACT	cis-acting regulatory element related to meristem expression
AhERF-11	CAT-box	Arabidopsis thaliana	1001	-	6	GCCACT	cis-acting regulatory element related to meristem expression
AhERF-11	GA-motif	Arabidopsis thaliana	295	+	8	ATAGATAA	part of a light responsive element
AhERF-11	GA-motif	Arabidopsis thaliana	512	+	8	ATAGATAA	part of a light responsive element
AhERF-11	MRE	Petroselinum crispum	1286	+	7	AACCTAA	MYB binding site involved in light responsiveness
AhERF-11	TC-rich repeats	Nicotiana tabacum	970	-	9	ATTCTCTAAC	cis-acting element involved in defense and stress responsiveness
AhERF-11	TCT-motif	Arabidopsis thaliana	901	-	6	TCTTAC	part of a light responsive element
AhERF-11	chs-CMA1a	Daucus carota	226	-	8	TTACTTAA	part of a light responsive element
AhERF-12	A-box	Petroselinum crispum	172	-	6	CCGTCC	cis-acting regulatory element
AhERF-12	ABRE	Arabidopsis thaliana	321	-	5	ACGTG	cis-acting element involved in the abscisic acid responsiveness
AhERF-12	ABRE	Arabidopsis thaliana	808	+	5	ACGTG	cis-acting element involved in the abscisic acid responsiveness
AhERF-12	ABRE	Arabidopsis thaliana	490	-	5	ACGTG	cis-acting element involved in the abscisic acid responsiveness
AhERF-12	ARE	Zea mays	1455	+	6	AAACCA	cis-acting regulatory element essential for the anaerobic induction
AhERF-12	ARE	Zea mays	520	+	6	AAACCA	cis-acting regulatory element essential for the anaerobic induction
AhERF-12	ATC-motif	Spinacia oleracea	555	+	8	AGTAATCT	part of a conserved DNA module involved in light responsiveness
AhERF-12	ATCT-motif	Pisum sativum	955	+	9	AATCTAATCC	part of a conserved DNA module involved in light responsiveness
AhERF-12	ATCT-motif	Pisum sativum	558	+	9	AATCTAATCC	part of a conserved DNA module involved in light responsiveness
AhERF-12	Box 4	Petroselinum crispum	664	+	6	ATTAAT	part of a conserved DNA module involved in light responsiveness
AhERF-12	G-Box	Pisum sativum	807	-	6	CACGTT	cis-acting regulatory element involved in light responsiveness
AhERF-12	G-box	Zea mays	321	+	6	CACGTC	cis-acting regulatory element involved in light responsiveness
AhERF-12	G-box	Arabidopsis thaliana	490	-	6	TACGTG	cis-acting regulatory element involved in light responsiveness
AhERF-12	GATA-motif	Arabidopsis thaliana	432	+	7	GATAGGA	part of a light responsive element
AhERF-12	GC-motif	Zea mays	96	+	6	CCCCCG	enhancer-like element involved in anoxic specific inducibility
AhERF-12	GT1-motif	Avena sativa	1279	+	7	GGTTAAT	light responsive element
AhERF-12	O2-site	Zea mays	17	-	9	GATGACATGG	cis-acting regulatory element involved in zein metabolism regulation
AhERF-12	O2-site	Zea mays	239	-	9	GATGACATGG	cis-acting regulatory element involved in zein metabolism regulation
AhERF-12	Sp1	Oryza sativa	99	-	6	GGGCGG	light responsive element
AhERF-12	TCT-motif	Arabidopsis thaliana	76	-	6	TCTTAC	part of a light responsive element
AhERF-13	ABRE	Arabidopsis thaliana	229	-	5	ACGTG	cis-acting element involved in the abscisic acid responsiveness
AhERF-13	Box 4	Petroselinum crispum	461	+	6	ATTAAT	part of a conserved DNA module involved in light responsiveness
AhERF-13	Box 4	Petroselinum crispum	968	-	6	ATTAAT	part of a conserved DNA module involved in light responsiveness
AhERF-13	Box 4	Petroselinum crispum	945	-	6	ATTAAT	part of a conserved DNA module involved in light responsiveness
AhERF-13	Box 4	Petroselinum crispum	98	+	6	ATTAAT	part of a conserved DNA module involved in light responsiveness
AhERF-13	Box 4	Petroselinum crispum	368	+	6	ATTAAT	part of a conserved DNA module involved in light responsiveness
AhERF-13	CGTCA-motif	Hordeum vulgare	143	-	5	CGTCA	cis-acting regulatory element involved in the MeJA-responsiveness
AhERF-13	CGTCA-motif	Hordeum vulgare	1407	-	5	CGTCA	cis-acting regulatory element involved in the MeJA-responsiveness
AhERF-13	G-Box	Pisum sativum	229	+	6	CACGTT	cis-acting regulatory element involved in light responsiveness
AhERF-13	GATA-motif	Arabidopsis thaliana	730	-	7	GATAGGA	part of a light responsive element
AhERF-13	GATA-motif	Pisum sativum	248	-	7	GATAGGG	part of a light responsive element
AhERF-13	GATA-motif	Pisum sativum	716	+	7	GATAGGG	part of a light responsive element
AhERF-13	GC-motif	Zea mays	1107	-	6	CCCCCG	enhancer-like element involved in anoxic specific inducibility
AhERF-13	GT1-motif	Arabidopsis thaliana	328	-	6	GGTTAA	light responsive element
AhERF-13	I-box	Zea mays	676	-	9	gGATAAGGTG	part of a light responsive element
AhERF-13	TCT-motif	Arabidopsis thaliana	1356	+	6	TCTTAC	part of a light responsive element
AhERF-13	TCT-motif	Arabidopsis thaliana	1390	+	6	TCTTAC	part of a light responsive element
AhERF-13	TGACG-motif	Hordeum vulgare	1407	+	5	TGACG	cis-acting regulatory element involved in the MeJA-responsiveness
AhERF-13	TGACG-motif	Hordeum vulgare	143	+	5	TGACG	cis-acting regulatory element involved in the MeJA-responsiveness
AhERF-14	ABRE	Arabidopsis thaliana	1047	-	5	ACGTG	cis-acting element involved in the abscisic acid responsiveness
AhERF-14	ABRE	Arabidopsis thaliana	1460	+	5	ACGTG	cis-acting element involved in the abscisic acid responsiveness
AhERF-14	AT-rich element	Glycine max	453	-	10	ATAGAAATCAA	binding site of AT-rich DNA binding protein (ATBP-1)
AhERF-14	Box 4	Petroselinum crispum	604	+	6	ATTAAT	part of a conserved DNA module involved in light responsiveness
AhERF-14	Box 4	Petroselinum crispum	1329	-	6	ATTAAT	part of a conserved DNA module involved in light responsiveness
AhERF-14	Box 4	Petroselinum crispum	33	+	6	ATTAAT	part of a conserved DNA module involved in light responsiveness
AhERF-14	Box 4	Petroselinum crispum	8	+	6	ATTAAT	part of a conserved DNA module involved in light responsiveness
AhERF-14	G-Box	Pisum sativum	1459	-	6	CACGTT	cis-acting regulatory element involved in
AhERF-14	G-box	Zea mays	1047	+	6	CACGTC	cis-acting regulatory element involved in light responsiveness
AhERF-14	GT1-motif	Arabidopsis thaliana	520	-	6	GGTTAA	light responsive element
AhERF-14	GT1-motif	Avena sativa	546	+	7	GGTTAAT	light responsive element
AhERF-14	LTR	Hordeum vulgare	947	-	6	CCGAAA	cis-acting element involved in low-temperature responsiveness
AhERF-14	TCA-element	Nicotiana tabacum	285	-	9	CCATCTTTTT	cis-acting element involved in salicylic acid responsiveness
AhERF-14	TCA-element	Brassica oleracea	1215	-	9	TCAGAAGAGG	cis-acting element involved in salicylic acid responsiveness
AhERF-14	WUN-motif	Brassica oleracea	823	-	9	AAATTTCCT	wound-responsive element
AhERF-14	circadian	Lycopersicon esculentum	99	+	9	CAAAGATATC	cis-acting regulatory element involved in circadian control
AhERF-15	ABRE	Arabidopsis thaliana	611	+	5	ACGTG	cis-acting element involved in the abscisic acid responsiveness
AhERF-15	Box 4	Petroselinum crispum	916	-	6	ATTAAT	part of a conserved DNA module involved in light responsiveness
AhERF-15	Box 4	Petroselinum crispum	810	-	6	ATTAAT	part of a conserved DNA module involved in light responsiveness
AhERF-15	Box 4	Petroselinum crispum	468	+	6	ATTAAT	part of a conserved DNA module involved in light responsiveness
AhERF-15	Box 4	Petroselinum crispum	1288	-	6	ATTAAT	part of a conserved DNA module involved in light responsiveness
AhERF-15	Box 4	Petroselinum crispum	861	-	6	ATTAAT	part of a conserved DNA module involved in light responsiveness
AhERF-15	Box 4	Petroselinum crispum	1029	-	6	ATTAAT	part of a conserved DNA module involved in light responsiveness
AhERF-15	Box 4	Petroselinum crispum	1077	-	6	ATTAAT	part of a conserved DNA module involved in light responsiveness
AhERF-15	G-box	Zea mays	706	-	6	CACGAC	cis-acting regulatory element involved in light responsiveness
AhERF-15	G-box	Zea mays	330	+	6	CACGAC	cis-acting regulatory element involved in light responsiveness
AhERF-15	G-box	Arabidopsis thaliana	610	+	6	TACGTG	cis-acting regulatory element involved in light responsiveness
AhERF-15	LTR	Hordeum vulgare	1295	-	6	CCGAAA	cis-acting element involved in low-temperature responsiveness
AhERF-15	MRE	Petroselinum crispum	203	-	7	AACCTAA	MYB binding site involved in light responsiveness
AhERF-15	TC-rich repeats	Nicotiana tabacum	1370	+	9	ATTCTCTAAC	cis-acting element involved in defense and stress responsiveness
AhERF-15	TCT-motif	Arabidopsis thaliana	1236	-	6	TCTTAC	part of a light responsive element
AhERF-15	TCT-motif	Arabidopsis thaliana	2	+	6	TCTTAC	part of a light responsive element
AhERF-15	TGA-element	Brassica oleracea	1327	+	6	AACGAC	auxin-responsive element
AhERF-16	ABRE	Arabidopsis thaliana	611	+	5	ACGTG	cis-acting element involved in the abscisic acid responsiveness
AhERF-16	Box 4	Petroselinum crispum	916	-	6	ATTAAT	part of a conserved DNA module involved in light responsiveness
AhERF-16	Box 4	Petroselinum crispum	468	+	6	ATTAAT	part of a conserved DNA module involved in light responsiveness
AhERF-16	Box 4	Petroselinum crispum	1288	-	6	ATTAAT	part of a conserved DNA module involved in light responsiveness
AhERF-16	Box 4	Petroselinum crispum	810	-	6	ATTAAT	part of a conserved DNA module involved in light responsiveness
AhERF-16	Box 4	Petroselinum crispum	861	-	6	ATTAAT	part of a conserved DNA module involved in light responsiveness
AhERF-16	Box 4	Petroselinum crispum	1077	-	6	ATTAAT	part of a conserved DNA module involved in light responsiveness
AhERF-16	Box 4	Petroselinum crispum	1029	-	6	ATTAAT	part of a conserved DNA module involved in light responsiveness
AhERF-16	G-box	Zea mays	706	-	6	CACGAC	cis-acting regulatory element involved in light responsiveness
AhERF-16	G-box	Arabidopsis thaliana	610	+	6	TACGTG	cis-acting regulatory element involved in light responsiveness
AhERF-16	G-box	Zea mays	330	+	6	CACGAC	cis-acting regulatory element involved in light responsiveness
AhERF-16	LTR	Hordeum vulgare	1295	-	6	CCGAAA	cis-acting element involved in low-temperature responsiveness
AhERF-16	MRE	Petroselinum crispum	203	-	7	AACCTAA	MYB binding site involved in light responsiveness
AhERF-16	TC-rich repeats	Nicotiana tabacum	1370	+	9	ATTCTCTAAC	cis-acting element involved in defense and stress responsiveness
AhERF-16	TCT-motif	Arabidopsis thaliana	2	+	6	TCTTAC	part of a light responsive element
AhERF-16	TCT-motif	Arabidopsis thaliana	1236	-	6	TCTTAC	part of a light responsive element
AhERF-16	TGA-element	Brassica oleracea	1327	+	6	AACGAC	auxin-responsive element
AhERF-17	A-box	Petroselinum crispum	320	+	6	CCGTCC	cis-acting regulatory element
AhERF-17	ABRE	Arabidopsis thaliana	1240	+	5	ACGTG	cis-acting element involved in the abscisic acid responsiveness
AhERF-17	ABRE	Arabidopsis thaliana	1239	-	6	CACGTG	cis-acting element involved in the abscisic acid responsiveness
AhERF-17	ABRE	Arabidopsis thaliana	782	-	5	ACGTG	cis-acting element involved in the abscisic acid responsiveness
AhERF-17	ACA-motif	Arabidopsis thaliana	236	+	12	AATCACAACCATA	part of gapA in (gapA-CMA1) involved with light responsiveness
AhERF-17	AT-rich element	Glycine max	1049	+	10	ATAGAAATCAA	binding site of AT-rich DNA binding protein (ATBP-1)
AhERF-17	AT1-motif	Solanum tuberosum	1464	+	13	AATTATTTTTTATT	part of a light responsive module
AhERF-17	Box 4	Petroselinum crispum	89	+	6	ATTAAT	part of a conserved DNA module involved in light responsiveness
AhERF-17	Box 4	Petroselinum crispum	1390	-	6	ATTAAT	part of a conserved DNA module involved in light responsiveness
AhERF-17	Box 4	Petroselinum crispum	508	+	6	ATTAAT	part of a conserved DNA module involved in light responsiveness
AhERF-17	Box 4	Petroselinum crispum	1373	-	6	ATTAAT	part of a conserved DNA module involved in light responsiveness
AhERF-17	G-Box	Pisum sativum	782	+	6	CACGTT	cis-acting regulatory element involved in light responsiveness
AhERF-17	G-Box	Pisum sativum	1239	-	6	CACGTG	cis-acting regulatory element involved in light responsiveness
AhERF-17	G-box	Arabidopsis thaliana	1239	-	6	CACGTG	cis-acting regulatory element involved in light responsiveness
AhERF-17	MBSI	Petunia hybrida	268	+	10.5	aaaAaaC(G/C)GTTA	MYB binding site involved in flavonoid biosynthetic genes regulation
AhERF-17	TCT-motif	Arabidopsis thaliana	453	+	6	TCTTAC	part of a light responsive element
AhERF-17	TCT-motif	Arabidopsis thaliana	385	-	6	TCTTAC	part of a light responsive element
AhERF-17	TGA-element	Brassica oleracea	1117	-	6	AACGAC	auxin-responsive element
AhERF-17	TGA-element	Brassica oleracea	1187	-	6	AACGAC	auxin-responsive element
AhERF-17	circadian	Lycopersicon esculentum	37	-	9	CAAAGATATC	cis-acting regulatory element involved in circadian control
AhERF-18	ABRE	Arabidopsis thaliana	1230	+	5	ACGTG	cis-acting element involved in the abscisic acid responsiveness
AhERF-18	ABRE	Arabidopsis thaliana	597	+	5	ACGTG	cis-acting element involved in the abscisic acid responsiveness
AhERF-18	ABRE	Arabidopsis thaliana	1229	-	6	CACGTG	cis-acting element involved in the abscisic acid responsiveness
AhERF-18	ARE	Zea mays	1195	+	6	AAACCA	cis-acting regulatory element essential for the anaerobic induction
AhERF-18	ATC-motif	Spinacia oleracea	857	+	8	AGTAATCT	part of a conserved DNA module involved in light responsiveness
AhERF-18	Box 4	Petroselinum crispum	435	+	6	ATTAAT	part of a conserved DNA module involved in light responsiveness
AhERF-18	Box 4	Petroselinum crispum	1003	-	6	ATTAAT	part of a conserved DNA module involved in light responsiveness
AhERF-18	Box 4	Petroselinum crispum	1462	-	6	ATTAAT	part of a conserved DNA module involved in light responsiveness
AhERF-18	Box 4	Petroselinum crispum	687	+	6	ATTAAT	part of a conserved DNA module involved in light responsiveness
AhERF-18	Box 4	Petroselinum crispum	3	+	6	ATTAAT	part of a conserved DNA module involved in light responsiveness
AhERF-18	Box 4	Petroselinum crispum	1281	-	6	ATTAAT	part of a conserved DNA module involved in light responsiveness
AhERF-18	Box 4	Petroselinum crispum	999	-	6	ATTAAT	part of a conserved DNA module involved in light responsiveness
AhERF-18	Box 4	Petroselinum crispum	297	+	6	ATTAAT	part of a conserved DNA module involved in light responsiveness
AhERF-18	Box 4	Petroselinum crispum	110	+	6	ATTAAT	part of a conserved DNA module involved in light responsiveness
AhERF-18	Box 4	Petroselinum crispum	1368	-	6	ATTAAT	part of a conserved DNA module involved in light responsiveness
AhERF-18	G-Box	Pisum sativum	1229	-	6	CACGTG	cis-acting regulatory element involved in light responsiveness
AhERF-18	G-box	Arabidopsis thaliana	596	+	6	TACGTG	cis-acting regulatory element involved in light responsiveness
AhERF-18	G-box	Arabidopsis thaliana	1229	-	6	CACGTG	cis-acting regulatory element involved in light responsiveness
AhERF-18	GA-motif	Arabidopsis thaliana	371	+	8	ATAGATAA	part of a light responsive element
AhERF-18	GATA-motif	Solanum tuberosum	786	-	10	AAGGATAAGG	part of a light responsive element
AhERF-18	GATA-motif	Arabidopsis thaliana	1325	-	11	AAGATAAGATT	part of a light responsive element
AhERF-18	GCN4_motif	Oryza sativa	1224	-	7	TGAGTCA	cis-regulatory element involved in endosperm expression
AhERF-18	I-box	Zea mays	230	-	9	gGATAAGGTG	part of a light responsive element
AhERF-18	I-box	Arabidopsis thaliana	786	+	9	ccttatcct	part of a light responsive element
AhERF-18	TC-rich repeats	Nicotiana tabacum	555	-	9	ATTCTCTAAC	cis-acting element involved in defense and stress responsiveness
AhERF-18	TCA-element	Nicotiana tabacum	472	+	9	CCATCTTTTT	cis-acting element involved in salicylic acid responsiveness
AhERF-18	TCCC-motif	Spinacia oleracea	782	+	7	TCTCCCT	part of a light responsive element
AhERF-19	ABRE	Arabidopsis thaliana	630	+	5	ACGTG	cis-acting element involved in the abscisic acid responsiveness
AhERF-19	ABRE	Arabidopsis thaliana	542	+	6	CACGTG	cis-acting element involved in the abscisic acid responsiveness
AhERF-19	ABRE	Arabidopsis thaliana	773	+	5	ACGTG	cis-acting element involved in the abscisic acid responsiveness
AhERF-19	ABRE	Arabidopsis thaliana	208	+	5	ACGTG	cis-acting element involved in the abscisic acid responsiveness
AhERF-19	ABRE	Arabidopsis thaliana	543	+	5	ACGTG	cis-acting element involved in the abscisic acid responsiveness
AhERF-19	Box 4	Petroselinum crispum	753	-	6	ATTAAT	part of a conserved DNA module involved in light responsiveness
AhERF-19	CCAAT-box	Hordeum vulgare	403	+	6	CAACGG	MYBHv1 binding site
AhERF-19	CCAAT-box	Hordeum vulgare	780	+	6	CAACGG	MYBHv1 binding site
AhERF-19	CGTCA-motif	Hordeum vulgare	628	-	5	CGTCA	cis-acting regulatory element involved in the MeJA-responsiveness
AhERF-19	G-Box	Pisum sativum	542	+	6	CACGTG	cis-acting regulatory element involved in light responsiveness
AhERF-19	G-Box	Pisum sativum	207	-	6	CACGTT	cis-acting regulatory element involved in light responsiveness
AhERF-19	G-Box	Pisum sativum	772	-	6	CACGTT	cis-acting regulatory element involved in light responsiveness
AhERF-19	G-box	Zea mays	629	-	6	CACGTC	cis-acting regulatory element involved in light responsiveness
AhERF-19	G-box	Zea mays	624	-	6	CACGAC	cis-acting regulatory element involved in light responsiveness
AhERF-19	G-box	Arabidopsis thaliana	542	+	6	CACGTG	cis-acting regulatory element involved in light responsiveness
AhERF-19	LTR	Hordeum vulgare	148	+	6	CCGAAA	cis-acting element involved in low-temperature responsiveness
AhERF-19	LTR	Hordeum vulgare	233	+	6	CCGAAA	cis-acting element involved in low-temperature responsiveness
AhERF-19	MBS	Arabidopsis thaliana	87	+	6	CAACTG	MYB binding site involved in drought-inducibility
AhERF-19	MRE	Petroselinum crispum	1142	+	7	AACCTAA	MYB binding site involved in light responsiveness
AhERF-19	O2-site	Zea mays	1476	-	8	GATGA(C/T)(A/G)TG(A/G)	cis-acting regulatory element involved in zein metabolism regulation
AhERF-19	TGA-element	Brassica oleracea	1092	-	6	AACGAC	auxin-responsive element
AhERF-19	TGACG-motif	Hordeum vulgare	628	+	5	TGACG	cis-acting regulatory element involved in the MeJA-responsiveness
AhERF-20	ABRE	Arabidopsis thaliana	1174	+	5	ACGTG	cis-acting element involved in the abscisic acid responsiveness
AhERF-20	ABRE	Arabidopsis thaliana	1335	-	5	ACGTG	cis-acting element involved in the abscisic acid responsiveness
AhERF-20	ARE	Zea mays	612	+	6	AAACCA	cis-acting regulatory element essential for the anaerobic induction
AhERF-20	ARE	Zea mays	599	-	6	AAACCA	cis-acting regulatory element essential for the anaerobic induction
AhERF-20	Box 4	Petroselinum crispum	512	+	6	ATTAAT	part of a conserved DNA module involved in light responsiveness
AhERF-20	Box 4	Petroselinum crispum	328	+	6	ATTAAT	part of a conserved DNA module involved in light responsiveness
AhERF-20	Box 4	Petroselinum crispum	1437	-	6	ATTAAT	part of a conserved DNA module involved in light responsiveness
AhERF-20	Box 4	Petroselinum crispum	1088	-	6	ATTAAT	part of a conserved DNA module involved in light responsiveness
AhERF-20	CGTCA-motif	Hordeum vulgare	1308	-	5	CGTCA	cis-acting regulatory element involved in the MeJA-responsiveness
AhERF-20	G-box	Brassica napus	1172	-	8	CCACGTAA	cis-acting regulatory element involved in light responsiveness
AhERF-20	G-box	Arabidopsis thaliana	1335	-	6	TACGTG	cis-acting regulatory element involved in light responsiveness
AhERF-20	G-box	Arabidopsis thaliana	1173	+	6	TACGTG	cis-acting regulatory element involved in light responsiveness
AhERF-20	GT1-motif	Arabidopsis thaliana	518	-	6	GGTTAA	light responsive element
AhERF-20	I-box	Flaveria trinervia	854	-	11	cCATATCCAAT	part of a light responsive element
AhERF-20	LTR	Hordeum vulgare	522	+	6	CCGAAA	cis-acting element involved in low-temperature responsiveness
AhERF-20	TC-rich repeats	Nicotiana tabacum	1041	+	9	ATTCTCTAAC	cis-acting element involved in defense and stress responsiveness
AhERF-20	TCT-motif	Arabidopsis thaliana	1170	+	6	TCTTAC	part of a light responsive element
AhERF-20	TCT-motif	Arabidopsis thaliana	398	-	6	TCTTAC	part of a light responsive element
AhERF-20	TGACG-motif	Hordeum vulgare	1308	+	5	TGACG	cis-acting regulatory element involved in the MeJA-responsiveness
AhERF-20	WUN-motif	Brassica oleracea	243	+	9	AAATTTCCT	wound-responsive element
AhERF-21	ABRE	Arabidopsis thaliana	336	+	6	CACGTG	cis-acting element involved in the abscisic acid responsiveness
AhERF-21	ABRE	Arabidopsis thaliana	337	+	5	ACGTG	cis-acting element involved in the abscisic acid responsiveness
AhERF-21	ARE	Zea mays	159	-	6	AAACCA	cis-acting regulatory element essential for the anaerobic induction
AhERF-21	ARE	Zea mays	59	-	6	AAACCA	cis-acting regulatory element essential for the anaerobic induction
AhERF-21	ARE	Zea mays	1493	-	6	AAACCA	cis-acting regulatory element essential for the anaerobic induction
AhERF-21	ARE	Zea mays	1407	-	6	AAACCA	cis-acting regulatory element essential for the anaerobic induction
AhERF-21	ATC-motif	Spinacia oleracea	447	+	8	AGTAATCT	part of a conserved DNA module involved in light responsiveness
AhERF-21	ATCT-motif	Pisum sativum	25	-	9	AATCTAATCC	part of a conserved DNA module involved in light responsiveness
AhERF-21	Box 4	Petroselinum crispum	1068	-	6	ATTAAT	part of a conserved DNA module involved in light responsiveness
AhERF-21	Box 4	Petroselinum crispum	621	+	6	ATTAAT	part of a conserved DNA module involved in light responsiveness
AhERF-21	Box 4	Petroselinum crispum	617	+	6	ATTAAT	part of a conserved DNA module involved in light responsiveness
AhERF-21	Box 4	Petroselinum crispum	279	+	6	ATTAAT	part of a conserved DNA module involved in light responsiveness
AhERF-21	G-Box	Pisum sativum	336	+	6	CACGTG	cis-acting regulatory element involved in light responsiveness
AhERF-21	G-box	Arabidopsis thaliana	336	+	6	CACGTG	cis-acting regulatory element involved in light responsiveness
AhERF-21	Gap-box	Arabidopsis thaliana	1276	-	9.5	CAAATGAA(A/G)A	part of a light responsive element
AhERF-21	HD-Zip 3	Arabidopsis thaliana	706	+	9.5	GTAAT(G/C)ATTAC	protein binding site
AhERF-21	LS7	Zea mays	1050	+	13	CAGATTTATTTTTA	part of a light responsive element
AhERF-21	LTR	Hordeum vulgare	62	-	6	CCGAAA	cis-acting element involved in low-temperature responsiveness
AhERF-21	LTR	Hordeum vulgare	44	+	6	CCGAAA	cis-acting element involved in low-temperature responsiveness
AhERF-21	O2-site	Zea mays	130	+	9	GATGACATGG	cis-acting regulatory element involved in zein metabolism regulation
AhERF-21	P-box	Oryza sativa	20	-	7	CCTTTTG	gibberellin-responsive element
AhERF-21	TCT-motif	Arabidopsis thaliana	571	+	6	TCTTAC	part of a light responsive element
AhERF-21	TGA-element	Brassica oleracea	262	-	6	AACGAC	auxin-responsive element
AhERF-22	ABRE	Arabidopsis thaliana	172	+	5	ACGTG	cis-acting element involved in the abscisic acid responsiveness
AhERF-22	ABRE	Arabidopsis thaliana	997	-	5	ACGTG	cis-acting element involved in the abscisic acid responsiveness
AhERF-22	ARE	Zea mays	1014	+	6	AAACCA	cis-acting regulatory element essential for the anaerobic induction
AhERF-22	ARE	Zea mays	246	-	6	AAACCA	cis-acting regulatory element essential for the anaerobic induction
AhERF-22	ARE	Zea mays	766	+	6	AAACCA	cis-acting regulatory element essential for the anaerobic induction
AhERF-22	AT1-motif	Solanum tuberosum	672	+	13	AATTATTTTTTATT	part of a light responsive module
AhERF-22	AT1-motif	Solanum tuberosum	1372	-	13	AATTATTTTTTATT	part of a light responsive module
AhERF-22	Box 4	Petroselinum crispum	1369	-	6	ATTAAT	part of a conserved DNA module involved in light responsiveness
AhERF-22	Box 4	Petroselinum crispum	865	-	6	ATTAAT	part of a conserved DNA module involved in light responsiveness
AhERF-22	Box 4	Petroselinum crispum	949	-	6	ATTAAT	part of a conserved DNA module involved in light responsiveness
AhERF-22	Box 4	Petroselinum crispum	470	+	6	ATTAAT	part of a conserved DNA module involved in light responsiveness
AhERF-22	Box 4	Petroselinum crispum	629	+	6	ATTAAT	part of a conserved DNA module involved in light responsiveness
AhERF-22	Box 4	Petroselinum crispum	1356	-	6	ATTAAT	part of a conserved DNA module involved in light responsiveness
AhERF-22	G-Box	Pisum sativum	171	-	6	CACGTT	cis-acting regulatory element involved in light responsiveness
AhERF-22	G-box	Arabidopsis thaliana	997	-	6	TACGTG	cis-acting regulatory element involved in light responsiveness
AhERF-22	GC-motif	Zea mays	1185	-	6	CCCCCG	enhancer-like element involved in anoxic specific inducibility
AhERF-22	GT1-motif	Arabidopsis thaliana	1487	+	6	GGTTAA	light responsive element
AhERF-22	TC-rich repeats	Nicotiana tabacum	1241	-	9	GTTTTCTTAC	cis-acting element involved in defense and stress responsiveness
AhERF-22	TCA-element	Nicotiana tabacum	1491	-	9	CCATCTTTTT	cis-acting element involved in salicylic acid responsiveness
AhERF-22	TCT-motif	Arabidopsis thaliana	1241	-	6	TCTTAC	part of a light responsive element
AhERF-22	TCT-motif	Arabidopsis thaliana	779	+	6	TCTTAC	part of a light responsive element
AhERF-22	chs-CMA1a	Daucus carota	730	-	8	TTACTTAA	part of a light responsive element
AhERF-22	chs-CMA2a	Petroselinum crispum	273	+	8	TCACTTGA	part of a light responsive element
AhERF-23	ABRE	Arabidopsis thaliana	1332	+	5	ACGTG	cis-acting element involved in the abscisic acid responsiveness
AhERF-23	ABRE	Arabidopsis thaliana	808	+	5	ACGTG	cis-acting element involved in the abscisic acid responsiveness
AhERF-23	ABRE	Arabidopsis thaliana	807	-	6	CACGTG	cis-acting element involved in the abscisic acid responsiveness
AhERF-23	ABRE	Arabidopsis thaliana	1331	-	6	CACGTG	cis-acting element involved in the abscisic acid responsiveness
AhERF-23	ABRE	Arabidopsis thaliana	1168	+	5	ACGTG	cis-acting element involved in the abscisic acid responsiveness
AhERF-23	ARE	Zea mays	12	-	6	AAACCA	cis-acting regulatory element essential for the anaerobic induction
AhERF-23	AT1-motif	Solanum tuberosum	437	+	13	AATTATTTTTTATT	part of a light responsive module
AhERF-23	Box 4	Petroselinum crispum	302	+	6	ATTAAT	part of a conserved DNA module involved in light responsiveness
AhERF-23	Box 4	Petroselinum crispum	1218	-	6	ATTAAT	part of a conserved DNA module involved in light responsiveness
AhERF-23	Box 4	Petroselinum crispum	606	+	6	ATTAAT	part of a conserved DNA module involved in light responsiveness
AhERF-23	G-Box	Pisum sativum	807	-	6	CACGTG	cis-acting regulatory element involved in light responsiveness
AhERF-23	G-Box	Pisum sativum	1331	-	6	CACGTG	cis-acting regulatory element involved in light responsiveness
AhERF-23	G-box	Arabidopsis thaliana	1331	-	6	CACGTG	cis-acting regulatory element involved in light responsiveness
AhERF-23	G-box	Arabidopsis thaliana	807	-	6	CACGTG	cis-acting regulatory element involved in light responsiveness
AhERF-23	G-box	Arabidopsis thaliana	1167	+	6	TACGTG	cis-acting regulatory element involved in light responsiveness
AhERF-23	GT1-motif	Solanum tuberosum	125	+	9	GTGTGTGAA	light responsive element
AhERF-23	P-box	Oryza sativa	522	+	7	CCTTTTG	gibberellin-responsive element
AhERF-23	TC-rich repeats	Nicotiana tabacum	1160	+	9	GTTTTCTTAC	cis-acting element involved in defense and stress responsiveness
AhERF-23	TCA-element	Nicotiana tabacum	1102	-	9	CCATCTTTTT	cis-acting element involved in salicylic acid responsiveness
AhERF-23	TCCC-motif	Spinacia oleracea	476	+	7	TCTCCCT	part of a light responsive element
AhERF-23	TCT-motif	Arabidopsis thaliana	1164	+	6	TCTTAC	part of a light responsive element
AhERF-23	TGA-element	Brassica oleracea	144	-	6	AACGAC	auxin-responsive element
AhERF-24	3-AF1 binding site	Solanum tuberosum	1111	-	10	TAAGAGAGGAA	light responsive element
AhERF-24	AE-box	Arabidopsis thaliana	264	+	8	AGAAACTT	part of a module for light response
AhERF-24	Box 4	Petroselinum crispum	508	+	6	ATTAAT	part of a conserved DNA module involved in light responsiveness
AhERF-24	Box 4	Petroselinum crispum	336	+	6	ATTAAT	part of a conserved DNA module involved in light responsiveness
AhERF-24	Box 4	Petroselinum crispum	641		6	ATTAAT	part of a conserved DNA module involved in light responsiveness
AhERF-24	CGTCA-motif	Hordeum vulgare	1466	+	5	CGTCA	cis-acting regulatory element involved in the MeJA-responsiveness
AhERF-24	CGTCA-motif	Hordeum vulgare	29	+	5	CGTCA	cis-acting regulatory element involved in the MeJA-responsiveness
AhERF-24	GT1-motif	Arabidopsis thaliana	1395	-	6	GGTTAA	light responsive element
AhERF-24	I-box	Larix laricina	319	+	9	GTATAAGGCC	part of a light responsive element
AhERF-24	O2-site	Zea mays	1487	-	9	GATGATGTGG	cis-acting regulatory element involved in zein metabolism regulation
AhERF-24	TC-rich repeats	Nicotiana tabacum	300	-	9	GTTTTCTTAC	cis-acting element involved in defense and stress responsiveness
AhERF-24	TCA-element	Nicotiana tabacum	68	+	9	CCATCTTTTT	cis-acting element involved in salicylic acid responsiveness
AhERF-24	TCT-motif	Arabidopsis thaliana	704	+	6	TCTTAC	part of a light responsive element
AhERF-24	TGACG-motif	Hordeum vulgare	29	-	5	TGACG	cis-acting regulatory element involved in the MeJA-responsiveness
AhERF-24	TGACG-motif	Hordeum vulgare	1466	-	5	TGACG	cis-acting regulatory element involved in the MeJA-responsiveness
AhERF-25	ABRE	Arabidopsis thaliana	917	-	6	CACGTG	cis-acting element involved in the abscisic acid responsiveness
AhERF-25	ABRE	Arabidopsis thaliana	1265	+	5	ACGTG	cis-acting element involved in the abscisic acid responsiveness
AhERF-25	ABRE	Arabidopsis thaliana	918	+	5	ACGTG	cis-acting element involved in the abscisic acid responsiveness
AhERF-25	ABRE	Arabidopsis thaliana	808	-	5	ACGTG	cis-acting element involved in the abscisic acid responsiveness
AhERF-25	ABRE	Hordeum vulgare	806	-	10	GCAACGTGTC	cis-acting element involved in the abscisic acid responsiveness
AhERF-25	ABRE	Arabidopsis thaliana	1079	+	5	ACGTG	cis-acting element involved in the abscisic acid responsiveness
AhERF-25	ARE	Zea mays	1397	-	6	AAACCA	cis-acting regulatory element essential for the anaerobic induction
AhERF-25	Box 4	Petroselinum crispum	952	-	6	ATTAAT	part of a conserved DNA module involved in light responsiveness
AhERF-25	Box II	Solanum tuberosum	1100	+	9	TGGTAATAA	part of a light responsive element
AhERF-25	CGTCA-motif	Hordeum vulgare	97	-	5	CGTCA	cis-acting regulatory element involved in the MeJA-responsiveness
AhERF-25	G-Box	Pisum sativum	917	-	6	CACGTG	cis-acting regulatory element involved in light responsiveness
AhERF-25	G-Box	Pisum sativum	1078	-	6	CACGTT	cis-acting regulatory element involved in light responsiveness
AhERF-25	G-Box	Pisum sativum	808	+	6	CACGTT	cis-acting regulatory element involved in light responsiveness
AhERF-25	G-Box	Pisum sativum	1264	-	6	CACGTT	cis-acting regulatory element involved in light responsiveness
AhERF-25	G-box	Arabidopsis thaliana	917	-	6	CACGTG	cis-acting regulatory element involved in light responsiveness
AhERF-25	G-box	Lycopersicon esculentum	805	+	11	tgACACGTGGCA	cis-acting regulatory element involved in light responsiveness
AhERF-25	G-box	Brassica oleracea	1262	+	8	TAAACGTG	cis-acting regulatory element involved in light responsiveness
AhERF-25	GCN4_motif	Oryza sativa	773	-	7	TGAGTCA	cis-regulatory element involved in endosperm expression
AhERF-25	GT1-motif	Avena sativa	29	+	7	GGTTAAT	light responsive element
AhERF-25	LTR	Hordeum vulgare	1028	+	6	CCGAAA	cis-acting element involved in low-temperature responsiveness
AhERF-25	LTR	Hordeum vulgare	594	+	6	CCGAAA	cis-acting element involved in low-temperature responsiveness
AhERF-25	LTR	Hordeum vulgare	553	+	6	CCGAAA	cis-acting element involved in low-temperature responsiveness
AhERF-25	LTR	Hordeum vulgare	600	+	6	CCGAAA	cis-acting element involved in low-temperature responsiveness
AhERF-25	MBS	Arabidopsis thaliana	1368	+	6	CAACTG	MYB binding site involved in drought-inducibility
AhERF-25	MBS	Arabidopsis thaliana	538	-	6	CAACTG	MYB binding site involved in drought-inducibility
AhERF-25	TCCC-motif	Spinacia oleracea	379	+	7	TCTCCCT	part of a light responsive element
AhERF-25	TCCC-motif	Spinacia oleracea	56	-	7	TCTCCCT	part of a light responsive element
AhERF-25	TGACG-motif	Hordeum vulgare	97	+	5	TGACG	cis-acting regulatory element involved in the MeJA-responsiveness
AhERF-26	Box 4	Petroselinum crispum	393	+	6	ATTAAT	part of a conserved DNA module involved in light responsiveness
AhERF-26	Box 4	Petroselinum crispum	1232	-	6	ATTAAT	part of a conserved DNA module involved in light responsiveness
AhERF-26	Box 4	Petroselinum crispum	602	+	6	ATTAAT	part of a conserved DNA module involved in light responsiveness
AhERF-26	Box 4	Petroselinum crispum	922	-	6	ATTAAT	part of a conserved DNA module involved in light responsiveness
AhERF-26	Box 4	Petroselinum crispum	1168	-	6	ATTAAT	part of a conserved DNA module involved in light responsiveness
AhERF-26	Box 4	Petroselinum crispum	211	+	6	ATTAAT	part of a conserved DNA module involved in light responsiveness
AhERF-26	Box 4	Petroselinum crispum	629	+	6	ATTAAT	part of a conserved DNA module involved in light responsiveness
AhERF-26	GA-motif	Arabidopsis thaliana	320	+	8	ATAGATAA	part of a light responsive element
AhERF-26	GARE-motif	Brassica oleracea	1303	+	7	TCTGTTG	gibberellin-responsive element
AhERF-26	I-box	Flaveria trinervia	41	-	10	cCATATCCAAT	part of a light responsive element
AhERF-26	LAMP-element	Pisum sativum	521	+	8	CTTTATCA	part of a light responsive element
AhERF-26	O2-site	Zea mays	1249	+	8	GATGA(C/T)(A/G)TG(A/G)	cis-acting regulatory element involved in zein metabolism regulation
AhERF-26	TCCC-motif	Spinacia oleracea	438	-	7	TCTCCCT	part of a light responsive element
AhERF-26	chs-CMA1a	Daucus carota	204	-	8	TTACTTAA	part of a light responsive element
AhERF-27	AE-box	Arabidopsis thaliana	1303	+	8	AGAAACTT	part of a module for light response
AhERF-27	ARE	Zea mays	1356	-	6	AAACCA	cis-acting regulatory element essential for the anaerobic induction
AhERF-27	ARE	Zea mays	1368	-	6	AAACCA	cis-acting regulatory element essential for the anaerobic induction
AhERF-27	AuxRR-core	Nicotiana tabacum	167	-	7	GGTCCAT	cis-acting regulatory element involved in auxin responsiveness
AhERF-27	Box 4	Petroselinum crispum	863	-	6	ATTAAT	part of a conserved DNA module involved in light responsiveness
AhERF-27	Box 4	Petroselinum crispum	573	+	6	ATTAAT	part of a conserved DNA module involved in light responsiveness
AhERF-27	Box 4	Petroselinum crispum	582	+	6	ATTAAT	part of a conserved DNA module involved in light responsiveness
AhERF-27	Box II -like sequence	Oryza sativa	185	-	10	TCCGTGTACCA	cis-acting regulatory element
AhERF-27	CAT-box	Arabidopsis thaliana	51	-	6	GCCACT	cis-acting regulatory element related to meristem expression
AhERF-27	GATA-motif	Arabidopsis thaliana	443	-	10	AAGATAAGATT	part of a light responsive element
AhERF-27	GATA-motif	Solanum tuberosum	1435	-	9	AAGGATAAGG	part of a light responsive element
AhERF-27	GATA-motif	Arabidopsis thaliana	1399	+	10	AAGATAAGATT	part of a light responsive element
AhERF-27	I-box	Zea mays	256	-	9	gGATAAGGTG	part of a light responsive element
AhERF-27	I-box	Gossypium hirsutum	1433	-	10	AAGATAAGGCT	part of a light responsive element
AhERF-27	LTR	Hordeum vulgare	534	-	6	CCGAAA	cis-acting element involved in low-temperature responsiveness
AhERF-27	LTR	Hordeum vulgare	1225	-	6	CCGAAA	cis-acting element involved in low-temperature responsiveness
AhERF-27	MRE	Petroselinum crispum	736	-	7	AACCTAA	MYB binding site involved in light responsiveness
AhERF-27	O2-site	Zea mays	999	+	8	GATGA(C/T)(A/G)TG(A/G)	cis-acting regulatory element involved in zein metabolism regulation
AhERF-27	TC-rich repeats	Nicotiana tabacum	551	-	9	GTTTTCTTAC	cis-acting element involved in defense and stress responsiveness
AhERF-27	TCA-element	Nicotiana tabacum	1349	-	9	CCATCTTTTT	cis-acting element involved in salicylic acid responsiveness
AhERF-27	TCT-motif	Arabidopsis thaliana	551	-	6	TCTTAC	part of a light responsive element
AhERF-27	TCT-motif	Arabidopsis thaliana	522	-	6	TCTTAC	part of a light responsive element
AhERF-27	circadian	Lycopersicon esculentum	730	-	9	CAAAGATATC	cis-acting regulatory element involved in circadian control
AhERF-28	ARE	Zea mays	864	+	6	AAACCA	cis-acting regulatory element essential for the anaerobic induction
AhERF-28	ARE	Zea mays	724	+	6	AAACCA	cis-acting regulatory element essential for the anaerobic induction
AhERF-28	Box 4	Petroselinum crispum	1337	-	6	ATTAAT	part of a conserved DNA module involved in light responsiveness
AhERF-28	CAT-box	Arabidopsis thaliana	1220	-	6	GCCACT	cis-acting regulatory element related to meristem expression
AhERF-28	CGTCA-motif	Hordeum vulgare	283	+	5	CGTCA	cis-acting regulatory element involved in the MeJA-responsiveness
AhERF-28	G-box	Zea mays	1045	+	6	CACGAC	cis-acting regulatory element involved in light responsiveness
AhERF-28	GC-motif	Zea mays	42	-	6	CCCCCG	enhancer-like element involved in anoxic specific inducibility
AhERF-28	LTR	Hordeum vulgare	231	+	6	CCGAAA	cis-acting element involved in low-temperature responsiveness
AhERF-28	LTR	Hordeum vulgare	39	-	6	CCGAAA	cis-acting element involved in low-temperature responsiveness
AhERF-28	TCCC-motif	Spinacia oleracea	93	-	7	TCTCCCT	part of a light responsive element
AhERF-28	TGACG-motif	Hordeum vulgare	283	-	5	TGACG	cis-acting regulatory element involved in the MeJA-responsiveness
AhERF-29	ATCT-motif	Pisum sativum	117	+	9	AATCTAATCC	part of a conserved DNA module involved in light responsiveness
AhERF-29	Box 4	Petroselinum crispum	1173	-	6	ATTAAT	part of a conserved DNA module involved in light responsiveness
AhERF-29	Box 4	Petroselinum crispum	394	+	6	ATTAAT	part of a conserved DNA module involved in light responsiveness
AhERF-29	Box 4	Petroselinum crispum	758	-		ATTAAT	part of a conserved DNA module involved in light responsiveness
AhERF-29	Box 4	Petroselinum crispum	742	+	6	ATTAAT	part of a conserved DNA module involved in light responsiveness
AhERF-29	Box 4	Petroselinum crispum	226	+	6	ATTAAT	part of a conserved DNA module involved in light responsiveness
AhERF-29	GA-motif	Arabidopsis thaliana	1206	-	8	ATAGATAA	part of a light responsive element
AhERF-29	GATA-motif	Arabidopsis thaliana	386	+	10	AAGATAAGATT	part of a light responsive element
AhERF-29	I-box	Triticum aestivum	148	-	8	AGATAAGG	part of a light responsive element
AhERF-29	MRE	Petroselinum crispum	117	+	7	AACCTAA	MYB binding site involved in light responsiveness
AhERF-29	TCT-motif	Arabidopsis thaliana	424	-	6	TCTTAC	part of a light responsive element
AhERF-29	chs-CMA2a	Petroselinum crispum	942	-	8	TCACTTGA	part of a light responsive element
AhERF-30	ABRE	Arabidopsis thaliana	379	+	5	ACGTG	cis-acting element involved in the abscisic acid responsiveness
AhERF-30	ABRE	Hordeum vulgare	376	+	9	CGCACGTGTC	cis-acting element involved in the abscisic acid responsiveness
AhERF-30	ABRE	Arabidopsis thaliana	378	+	6	CACGTG	cis-acting element involved in the abscisic acid responsiveness
AhERF-30	AE-box	Arabidopsis thaliana	1133	+	8	AGAAACAA	part of a module for light response
AhERF-30	Box 4	Petroselinum crispum	605	+	6	ATTAAT	part of a conserved DNA module involved in light responsiveness
AhERF-30	Box 4	Petroselinum crispum	1303	-	6	ATTAAT	part of a conserved DNA module involved in light responsiveness
AhERF-30	Box 4	Petroselinum crispum	1127	-	6	ATTAAT	part of a conserved DNA module involved in light responsiveness
AhERF-30	Box 4	Petroselinum crispum	1332	-	6	ATTAAT	part of a conserved DNA module involved in light responsiveness
AhERF-30	Box III	Pisum sativum	1072	+	11	atCATTTTCACt	protein binding site
AhERF-30	G-Box	Pisum sativum	378	+	6	CACGTG	cis-acting regulatory element involved in light responsiveness
AhERF-30	G-box	Arabidopsis thaliana	378	+	6	CACGTG	cis-acting regulatory element involved in light responsiveness
AhERF-30	G-box	Brassica oleracea	1381	+	9	TAACACGTAG	cis-acting regulatory element involved in light responsiveness
AhERF-30	GA-motif	Arabidopsis thaliana	698	+	8	ATAGATAA	part of a light responsive element
AhERF-30	GA-motif	Arabidopsis thaliana	142	-	8	ATAGATAA	part of a light responsive element
AhERF-30	GA-motif	Arabidopsis thaliana	1376	+	8	ATAGATAA	part of a light responsive element
AhERF-30	GT1-motif	Arabidopsis thaliana	1455	-	6	GGTTAA	light responsive element
AhERF-30	MBS	Arabidopsis thaliana	1270	-	6	CAACTG	MYB binding site involved in drought-inducibility
AhERF-30	MRE	Petroselinum crispum	209	-	7	AACCTAA	MYB binding site involved in light responsiveness
AhERF-30	circadian	Lycopersicon esculentum	82	-	9	CAAAGATATC	cis-acting regulatory element involved in circadian control
AhERF-31	AE-box	Arabidopsis thaliana	419	-	8	AGAAACAA	part of a module for light response
AhERF-31	ARE	Zea mays	967	-	6	AAACCA	cis-acting regulatory element essential for the anaerobic induction
AhERF-31	ARE	Zea mays	1005	-	6	AAACCA	cis-acting regulatory element essential for the anaerobic induction
AhERF-31	AT1-motif	Solanum tuberosum	623	-	13	AATTATTTTTTATT	part of a light responsive module
AhERF-31	Box 4	Petroselinum crispum	1330	-	6	ATTAAT	part of a conserved DNA module involved in light responsiveness
AhERF-31	Box 4	Petroselinum crispum	312	+	6	ATTAAT	part of a conserved DNA module involved in light responsiveness
AhERF-31	Box 4	Petroselinum crispum	318	+	6	ATTAAT	part of a conserved DNA module involved in light responsiveness
AhERF-31	Box 4	Petroselinum crispum	465	+	6	ATTAAT	part of a conserved DNA module involved in light responsiveness
AhERF-31	Box 4	Petroselinum crispum	65	+	6	ATTAAT	part of a conserved DNA module involved in light responsiveness
AhERF-31	Box 4	Petroselinum crispum	599	+	6	ATTAAT	part of a conserved DNA module involved in light responsiveness
AhERF-31	Box 4	Petroselinum crispum	69	+	6	ATTAAT	part of a conserved DNA module involved in light responsiveness
AhERF-31	Box 4	Petroselinum crispum	84	+	6	ATTAAT	part of a conserved DNA module involved in light responsiveness
AhERF-31	Box 4	Petroselinum crispum	1326	-	6	ATTAAT	part of a conserved DNA module involved in light responsiveness
AhERF-31	Box 4	Petroselinum crispum	892	-	6	ATTAAT	part of a conserved DNA module involved in light responsiveness
AhERF-31	CAT-box	Arabidopsis thaliana	228	+	6	GCCACT	cis-acting regulatory element related to meristem expression
AhERF-31	GATA-motif	Arabidopsis thaliana	1240	-	10	AAGATAAGATT	part of a light responsive element
AhERF-31	GATA-motif	Arabidopsis thaliana	434	+	7	GATAGGA	part of a light responsive element
AhERF-31	GCN4_motif	Oryza sativa	924	+	7	TGAGTCA	cis-regulatory element involved in endosperm expression
AhERF-31	GT1-motif	Arabidopsis thaliana	181	-	6	GGTTAA	light responsive element
AhERF-31	GT1-motif	Avena sativa	180	-	7	GGTTAAT	light responsive element
AhERF-31	I-box	Gossypium hirsutum	1240	-	10	AAGATAAGGCT	part of a light responsive element
AhERF-31	I-box	Triticum aestivum	1242	-	8	AGATAAGG	part of a light responsive element
AhERF-31	MBS	Arabidopsis thaliana	1348	+	6	CAACTG	MYB binding site involved in drought-inducibility
AhERF-31	TATC-box	Oryza sativa	808	+	7	TATCCCA	cis-acting element involved in gibberellin-responsiveness
AhERF-32	ABRE	Arabidopsis thaliana	813	+	5	ACGTG	cis-acting element involved in the abscisic acid responsiveness
AhERF-32	Box 4	Petroselinum crispum	550	+	6	ATTAAT	part of a conserved DNA module involved in light responsiveness
AhERF-32	Box 4	Petroselinum crispum	1396	-	6	ATTAAT	part of a conserved DNA module involved in light responsiveness
AhERF-32	Box 4	Petroselinum crispum	964	-	6	ATTAAT	part of a conserved DNA module involved in light responsiveness
AhERF-32	Box 4	Petroselinum crispum	945	-	6	ATTAAT	part of a conserved DNA module involved in light responsiveness
AhERF-32	Box 4	Petroselinum crispum	1075	-	6	ATTAAT	part of a conserved DNA module involved in light responsiveness
AhERF-32	CAT-box	Arabidopsis thaliana	164	+	6	GCCACT	cis-acting regulatory element related to meristem expression
AhERF-32	CGTCA-motif	Hordeum vulgare	876	+	5	CGTCA	cis-acting regulatory element involved in the MeJA-responsiveness
AhERF-32	G-box	Zea mays	812	-	6	CACGTC	cis-acting regulatory element involved in light responsiveness
AhERF-32	GARE-motif	Brassica oleracea	807	-	7	TCTGTTG	gibberellin-responsive element
AhERF-32	GCN4_motif	Oryza sativa	1160	+	7	TGAGTCA	cis-regulatory element involved in endosperm expression
AhERF-32	O2-site	Zea mays	438	-	9	GATGACATGG	cis-acting regulatory element involved in zein metabolism regulation
AhERF-32	TC-rich repeats	Nicotiana tabacum	1093	-	9	ATTCTCTAAC	cis-acting element involved in defense and stress responsiveness
AhERF-32	TGACG-motif	Hordeum vulgare	876	-	5	TGACG	cis-acting regulatory element involved in the MeJA-responsiveness
AhERF-33	3-AF1 binding site	Solanum tuberosum	1446	-	10	TAAGAGAGGAA	light responsive element
AhERF-33	3-AF1 binding site	Solanum tuberosum	273	-	11	TAAGAGAGGAA	light responsive element
AhERF-33	ABRE	Arabidopsis thaliana	1248	-	5	ACGTG	cis-acting element involved in the abscisic acid responsiveness
AhERF-33	ABRE	Oryza sativa	653	-	9	GCCGCGTGGC	cis-acting element involved in the abscisic acid responsiveness
AhERF-33	AE-box	Arabidopsis thaliana	1186	+	8	AGAAACAA	part of a module for light response
AhERF-33	ARE	Zea mays	1476	+	6	AAACCA	cis-acting regulatory element essential for the anaerobic induction
AhERF-33	Box 4	Petroselinum crispum	1485	-	6	ATTAAT	part of a conserved DNA module involved in light responsiveness
AhERF-33	Box 4	Petroselinum crispum	1082	-	6	ATTAAT	part of a conserved DNA module involved in light responsiveness
AhERF-33	Box 4	Petroselinum crispum	574	+	6	ATTAAT	part of a conserved DNA module involved in light responsiveness
AhERF-33	Box 4	Petroselinum crispum	596	+	6	ATTAAT	part of a conserved DNA module involved in light responsiveness
AhERF-33	Box 4	Petroselinum crispum	326	+	6	ATTAAT	part of a conserved DNA module involved in light responsiveness
AhERF-33	Box 4	Petroselinum crispum	81	+	6	ATTAAT	part of a conserved DNA module involved in light responsiveness
AhERF-33	CCAAT-box	Hordeum vulgare	905	-	6	CAACGG	MYBHv1 binding site
AhERF-33	CGTCA-motif	Hordeum vulgare	202	+	5	CGTCA	cis-acting regulatory element involved in the MeJA-responsiveness
AhERF-33	G-box	Brassica napus	1247	+	8	CCACGTAA	cis-acting regulatory element involved in light responsiveness
AhERF-33	G-box	Arabidopsis thaliana	1248	-	6	TACGTG	cis-acting regulatory element involved in light responsiveness
AhERF-33	GC-motif	Zea mays	1423	+	6	CCCCCG	enhancer-like element involved in anoxic specific inducibility
AhERF-33	GC-motif	Zea mays	1007	+	6	CCCCCG	enhancer-like element involved in anoxic specific inducibility
AhERF-33	I-box	Zea mays	1438	-	9	gGATAAGGTG	part of a light responsive element
AhERF-33	P-box	Oryza sativa	745	-	7	CCTTTTG	gibberellin-responsive element
AhERF-33	TCT-motif	Arabidopsis thaliana	1287	+	6	TCTTAC	part of a light responsive element
AhERF-33	TCT-motif	Arabidopsis thaliana	1452	+	6	TCTTAC	part of a light responsive element
AhERF-33	TGACG-motif	Hordeum vulgare	202	-	5	TGACG	cis-acting regulatory element involved in the MeJA-responsiveness
AhERF-34	A-box	Petroselinum crispum	1305	-	6	CCGTCC	cis-acting regulatory element
AhERF-34	ABRE	Arabidopsis thaliana	1217	-	5	ACGTG	cis-acting element involved in the abscisic acid responsiveness
AhERF-34	ABRE	Arabidopsis thaliana	914	+	5	ACGTG	cis-acting element involved in the abscisic acid responsiveness
AhERF-34	ABRE	Arabidopsis thaliana	584	+	6	CACGTG	cis-acting element involved in the abscisic acid responsiveness
AhERF-34	ABRE	Arabidopsis thaliana	585	+	5	ACGTG	cis-acting element involved in the abscisic acid responsiveness
AhERF-34	ABRE	Arabidopsis thaliana	913	-	6	CACGTG	cis-acting element involved in the abscisic acid responsiveness
AhERF-34	ABRE	Arabidopsis thaliana	290	+	5	ACGTG	cis-acting element involved in the abscisic acid responsiveness
AhERF-34	ARE	Zea mays	1272	-	6	AAACCA	cis-acting regulatory element essential for the anaerobic induction
AhERF-34	AT-rich element	Glycine max	1056	-	10	ATAGAAATCAA	binding site of AT-rich DNA binding protein (ATBP-1)
AhERF-34	ATC-motif	Spinacia oleracea	973	-	8	AGTAATCT	part of a conserved DNA module involved in light responsiveness
AhERF-34	Box 4	Petroselinum crispum	417	+	6	ATTAAT	part of a conserved DNA module involved in light responsiveness
AhERF-34	CCAAT-box	Hordeum vulgare	208	-	6	CAACGG	MYBHv1 binding site
AhERF-34	CGTCA-motif	Hordeum vulgare	316	+	5	CGTCA	cis-acting regulatory element involved in the MeJA-responsiveness
AhERF-34	CGTCA-motif	Hordeum vulgare	313	-	5	CGTCA	cis-acting regulatory element involved in the MeJA-responsiveness
AhERF-34	G-Box	Pisum sativum	584	+	6	CACGTG	cis-acting regulatory element involved in light responsiveness
AhERF-34	G-Box	Pisum sativum	913	-	6	CACGTG	cis-acting regulatory element involved in light responsiveness
AhERF-34	G-box	Arabidopsis thaliana	1217	-	6	TACGTG	cis-acting regulatory element involved in light responsiveness
AhERF-34	G-box	Zea mays	289	-	6	CACGTC	cis-acting regulatory element involved in light responsiveness
AhERF-34	G-box	Zea mays	105	+	6	CACGAC	cis-acting regulatory element involved in light responsiveness
AhERF-34	G-box	Arabidopsis thaliana	913	-	6	CACGTG	cis-acting regulatory element involved in light responsiveness
AhERF-34	G-box	Arabidopsis thaliana	584	+	6	CACGTG	cis-acting regulatory element involved in light responsiveness
AhERF-34	GARE-motif	Brassica oleracea	1341	+	7	TCTGTTG	gibberellin-responsive element
AhERF-34	GATA-motif	Arabidopsis thaliana	377	+	10	AAGATAAGATT	part of a light responsive element
AhERF-34	GATA-motif	Pisum sativum	250	+	7	GATAGGG	part of a light responsive element
AhERF-34	I-box	Zea mays	540	+	9	gGATAAGGTG	part of a light responsive element
AhERF-34	MBS	Arabidopsis thaliana	1400	+	6	CAACTG	MYB binding site involved in drought-inducibility
AhERF-34	P-box	Oryza sativa	1329	+	7	CCTTTTG	gibberellin-responsive element
AhERF-34	TC-rich repeats	Nicotiana tabacum	450	-	9	ATTCTCTAAC	cis-acting element involved in defense and stress responsiveness
AhERF-34	TGACG-motif	Hordeum vulgare	316	-	5	TGACG	cis-acting regulatory element involved in the MeJA-responsiveness
AhERF-34	TGACG-motif	Hordeum vulgare	313	+	5	TGACG	cis-acting regulatory element involved in the MeJA-responsiveness
AhERF-35	ABRE	Arabidopsis thaliana	667	-	5	ACGTG	cis-acting element involved in the abscisic acid responsiveness
AhERF-35	ABRE	Arabidopsis thaliana	227	+	5	ACGTG	cis-acting element involved in the abscisic acid responsiveness
AhERF-35	ARE	Zea mays	219	-	6	AAACCA	cis-acting regulatory element essential for the anaerobic induction
AhERF-35	ARE	Zea mays	154	-	6	AAACCA	cis-acting regulatory element essential for the anaerobic induction
AhERF-35	Box 4	Petroselinum crispum	978	-	6	ATTAAT	part of a conserved DNA module involved in light responsiveness
AhERF-35	Box 4	Petroselinum crispum	837	-	6	ATTAAT	part of a conserved DNA module involved in light responsiveness
AhERF-35	Box 4	Petroselinum crispum	525	+	6	ATTAAT	part of a conserved DNA module involved in light responsiveness
AhERF-35	Box 4	Petroselinum crispum	1155	-	6	ATTAAT	part of a conserved DNA module involved in light responsiveness
AhERF-35	Box 4	Petroselinum crispum	271	+	6	ATTAAT	part of a conserved DNA module involved in light responsiveness
AhERF-35	CGTCA-motif	Hordeum vulgare	225	-	5	CGTCA	cis-acting regulatory element involved in the MeJA-responsiveness
AhERF-35	G-box	Zea mays	667	+	6	CACGTC	cis-acting regulatory element involved in light responsiveness
AhERF-35	G-box	Zea mays	226	-	6	CACGTC	cis-acting regulatory element involved in light responsiveness
AhERF-35	GARE-motif	Brassica oleracea	1238	-	7	TCTGTTG	gibberellin-responsive element
AhERF-35	GT1-motif	Arabidopsis thaliana	186	-	6	GGTTAA	light responsive element
AhERF-35	GT1-motif	Avena sativa	185	-	7	GGTTAAT	light responsive element
AhERF-35	GT1-motif	Avena sativa	1191	+	7	GGTTAAT	light responsive element
AhERF-35	P-box	Oryza sativa	1314	-	7	CCTTTTG	gibberellin-responsive element
AhERF-35	TCA-element	Nicotiana tabacum	1104	+	9	CCATCTTTTT	cis-acting element involved in salicylic acid responsiveness
AhERF-35	TGACG-motif	Hordeum vulgare	225	+	5	TGACG	cis-acting regulatory element involved in the MeJA-responsiveness
AhERF-35	circadian	Lycopersicon esculentum	1059	-	9	CAAAGATATC	cis-acting regulatory element involved in circadian control
AhERF-36	ABRE	Arabidopsis thaliana	189	+	5	ACGTG	cis-acting element involved in the abscisic acid responsiveness
AhERF-36	ABRE	Arabidopsis thaliana	629	-	5	ACGTG	cis-acting element involved in the abscisic acid responsiveness
AhERF-36	ARE	Zea mays	181	-	6	AAACCA	cis-acting regulatory element essential for the anaerobic induction
AhERF-36	ARE	Zea mays	116	-	6	AAACCA	cis-acting regulatory element essential for the anaerobic induction
AhERF-36	Box 4	Petroselinum crispum	1117	-	6	ATTAAT	part of a conserved DNA module involved in light responsiveness
AhERF-36	Box 4	Petroselinum crispum	940	-	6	ATTAAT	part of a conserved DNA module involved in light responsiveness
AhERF-36	Box 4	Petroselinum crispum	233	+	6	ATTAAT	part of a conserved DNA module involved in light responsiveness
AhERF-36	Box 4	Petroselinum crispum	487	+	6	ATTAAT	part of a conserved DNA module involved in light responsiveness
AhERF-36	Box 4	Petroselinum crispum	799	-	6	ATTAAT	part of a conserved DNA module involved in light responsiveness
AhERF-36	CGTCA-motif	Hordeum vulgare	187	-	5	CGTCA	cis-acting regulatory element involved in the MeJA-responsiveness
AhERF-36	G-box	Zea mays	188	-	6	CACGTC	cis-acting regulatory element involved in light responsiveness
AhERF-36	G-box	Zea mays	629	+	6	CACGTC	cis-acting regulatory element involved in light responsiveness
AhERF-36	GARE-motif	Brassica oleracea	1200	-	7	TCTGTTG	gibberellin-responsive element
AhERF-36	GT1-motif	Avena sativa	147	-	7	GGTTAAT	light responsive element
AhERF-36	GT1-motif	Avena sativa	1153	+	7	GGTTAAT	light responsive element
AhERF-36	GT1-motif	Arabidopsis thaliana	148	-	6	GGTTAA	light responsive element
AhERF-36	P-box	Oryza sativa	1276	-	7	CCTTTTG	gibberellin-responsive element
AhERF-36	TCA-element	Nicotiana tabacum	1066	+	9	CCATCTTTTT	cis-acting element involved in salicylic acid responsiveness
AhERF-36	TGACG-motif	Hordeum vulgare	187	+	5	TGACG	cis-acting regulatory element involved in the MeJA-responsiveness
AhERF-36	circadian	Lycopersicon esculentum	1021	-	9	CAAAGATATC	cis-acting regulatory element involved in circadian control
AhERF-37	3-AF1 binding site	Solanum tuberosum	1467	-	10	TAAGAGAGGAA	light responsive element
AhERF-37	ABRE	Arabidopsis thaliana	677	+	6	CACGTG	cis-acting element involved in the abscisic acid responsiveness
AhERF-37	ABRE	Arabidopsis thaliana	678	+	5	ACGTG	cis-acting element involved in the abscisic acid responsiveness
AhERF-37	ABRE	Arabidopsis thaliana	594	+	6	CACGTG	cis-acting element involved in the abscisic acid responsiveness
AhERF-37	ABRE	Arabidopsis thaliana	595	+	5	ACGTG	cis-acting element involved in the abscisic acid responsiveness
AhERF-37	AE-box	Arabidopsis thaliana	1271	-	8	AGAAACAA	part of a module for light response
AhERF-37	ARE	Zea mays	1201	+	6	AAACCA	cis-acting regulatory element essential for the anaerobic induction
AhERF-37	ARE	Zea mays	759	+	6	AAACCA	cis-acting regulatory element essential for the anaerobic induction
AhERF-37	ATC-motif	Spinacia oleracea	3	-	8	AGTAATCT	part of a conserved DNA module involved in light responsiveness
AhERF-37	Box 4	Petroselinum crispum	61	+	6	ATTAAT	part of a conserved DNA module involved in light responsiveness
AhERF-37	Box 4	Petroselinum crispum	402	+	6	ATTAAT	part of a conserved DNA module involved in light responsiveness
AhERF-37	Box 4	Petroselinum crispum	395	+	6	ATTAAT	part of a conserved DNA module involved in light responsiveness
AhERF-37	G-Box	Pisum sativum	677	+	6	CACGTG	cis-acting regulatory element involved in light responsiveness
AhERF-37	G-Box	Pisum sativum	594	+	6	CACGTG	cis-acting regulatory element involved in light responsiveness
AhERF-37	G-box	Arabidopsis thaliana	594	+	6	CACGTG	cis-acting regulatory element involved in light responsiveness
AhERF-37	G-box	Arabidopsis thaliana	677	+	6	CACGTG	cis-acting regulatory element involved in light responsiveness
AhERF-37	GATA-motif	Arabidopsis thaliana	809	-	7	GATAGGA	part of a light responsive element
AhERF-37	GCN4_motif	Oryza sativa	869	+	7	TGAGTCA	cis-regulatory element involved in endosperm expression
AhERF-37	TCA-element	Nicotiana tabacum	1293	+	9	CCATCTTTTT	cis-acting element involved in salicylic acid responsiveness
AhERF-37	TCCC-motif	Spinacia oleracea	138	+	7	TCTCCCT	part of a light responsive element
AhERF-37	chs-CMA1a	Daucus carota	210	+	8	TTACTTAA	part of a light responsive element
AhERF-38	AE-box	Arabidopsis thaliana	150	-	8	AGAAACTT	part of a module for light response
AhERF-38	ARE	Zea mays	709	-	6	AAACCA	cis-acting regulatory element essential for the anaerobic induction
AhERF-38	ARE	Zea mays	329	-	6	AAACCA	cis-acting regulatory element essential for the anaerobic induction
AhERF-38	Box 4	Petroselinum crispum	409	+	6	ATTAAT	part of a conserved DNA module involved in light responsiveness
AhERF-38	Box 4	Petroselinum crispum	297	+	6	ATTAAT	part of a conserved DNA module involved in light responsiveness
AhERF-38	Box 4	Petroselinum crispum	733	+	6	ATTAAT	part of a conserved DNA module involved in light responsiveness
AhERF-38	Box 4	Petroselinum crispum	606	+	6	ATTAAT	part of a conserved DNA module involved in light responsiveness
AhERF-38	Box 4	Petroselinum crispum	1308	-	6	ATTAAT	part of a conserved DNA module involved in light responsiveness
AhERF-38	Box 4	Petroselinum crispum	531	+	6	ATTAAT	part of a conserved DNA module involved in light responsiveness
AhERF-38	CGTCA-motif	Hordeum vulgare	714	-	5	CGTCA	cis-acting regulatory element involved in the MeJA-responsiveness
AhERF-38	CGTCA-motif	Hordeum vulgare	4	-	5	CGTCA	cis-acting regulatory element involved in the MeJA-responsiveness
AhERF-38	GA-motif	Arabidopsis thaliana	852	+	8	ATAGATAA	part of a light responsive element
AhERF-38	GA-motif	Arabidopsis thaliana	1158	+	8	ATAGATAA	part of a light responsive element
AhERF-38	GT1-motif	Solanum tuberosum	11	+	9	GTGTGTGAA	light responsive element
AhERF-38	I-box	Gossypium hirsutum	785	-	10	AAGATAAGGCT	part of a light responsive element
AhERF-38	TC-rich repeats	Nicotiana tabacum	1474	-	9	GTTTTCTTAC	cis-acting element involved in defense and stress responsiveness
AhERF-38	TCA-element	Nicotiana tabacum	1423	+	9	CCATCTTTTT	cis-acting element involved in salicylic acid responsiveness
AhERF-38	TCA-element	Nicotiana tabacum	49	-	9	CCATCTTTTT	cis-acting element involved in salicylic acid responsiveness
AhERF-38	TGACG-motif	Hordeum vulgare	714	+	5	TGACG	cis-acting regulatory element involved in the MeJA-responsiveness
AhERF-38	TGACG-motif	Hordeum vulgare	4	+	5	TGACG	cis-acting regulatory element involved in the MeJA-responsiveness
AhERF-39	ABRE	Arabidopsis thaliana	332	+	5	ACGTG	cis-acting element involved in the abscisic acid responsiveness
AhERF-39	ABRE	Arabidopsis thaliana	300	+	5	ACGTG	cis-acting element involved in the abscisic acid responsiveness
AhERF-39	ABRE	Arabidopsis thaliana	299	+	6	CACGTG	cis-acting element involved in the abscisic acid responsiveness
AhERF-39	ABRE	Arabidopsis thaliana	331	+	6	CACGTG	cis-acting element involved in the abscisic acid responsiveness
AhERF-39	ARE	Zea mays	1440	+	6	AAACCA	cis-acting regulatory element essential for the anaerobic induction
AhERF-39	Box 4	Petroselinum crispum	1390	-	6	ATTAAT	part of a conserved DNA module involved in light responsiveness
AhERF-39	Box 4	Petroselinum crispum	65	+	6	ATTAAT	part of a conserved DNA module involved in light responsiveness
AhERF-39	Box 4	Petroselinum crispum	198	+	6	ATTAAT	part of a conserved DNA module involved in light responsiveness
AhERF-39	Box 4	Petroselinum crispum	998	-	6	ATTAAT	part of a conserved DNA module involved in light responsiveness
AhERF-39	Box 4	Petroselinum crispum	559	+	6	ATTAAT	part of a conserved DNA module involved in light responsiveness
AhERF-39	Box 4	Petroselinum crispum	747	+	6	ATTAAT	part of a conserved DNA module involved in light responsiveness
AhERF-39	Box II -like sequence	Oryza sativa	182	-	10	TCCGTGTACCA	cis-acting regulatory element
AhERF-39	G-Box	Pisum sativum	331	+	6	CACGTG	cis-acting regulatory element involved in light responsiveness
AhERF-39	G-Box	Pisum sativum	299	+	6	CACGTG	cis-acting regulatory element involved in light responsiveness
AhERF-39	G-box	Arabidopsis thaliana	331	+	6	CACGTG	cis-acting regulatory element involved in light responsiveness
AhERF-39	G-box	Arabidopsis thaliana	299	+	6	CACGTG	cis-acting regulatory element involved in light responsiveness
AhERF-39	GATA-motif	Arabidopsis thaliana	607	+	10	AAGATAAGATT	part of a light responsive element
AhERF-39	GCN4_motif	Oryza sativa	579	-	7	TGAGTCA	cis-regulatory element involved in endosperm expression
AhERF-39	GT1-motif	Arabidopsis thaliana	395	+	6	GGTTAA	light responsive element
AhERF-39	TCA-element	Nicotiana tabacum	1260	-	9	CCATCTTTTT	cis-acting element involved in salicylic acid responsiveness
AhERF-39	TCT-motif	Arabidopsis thaliana	443	-	6	TCTTAC	part of a light responsive element
AhERF-40	ABRE	Arabidopsis thaliana	857	-	5	ACGTG	cis-acting element involved in the abscisic acid responsiveness
AhERF-40	ABRE	Arabidopsis thaliana	307	+	5	ACGTG	cis-acting element involved in the abscisic acid responsiveness
AhERF-40	ABRE	Arabidopsis thaliana	11	+	5	ACGTG	cis-acting element involved in the abscisic acid responsiveness
AhERF-40	ABRE	Oryza sativa	855	-	8	TACGTGTC	cis-acting element involved in the abscisic acid responsiveness
AhERF-40	Box 4	Petroselinum crispum	702	+	6	ATTAAT	part of a conserved DNA module involved in light responsiveness
AhERF-40	Box 4	Petroselinum crispum	788	-	6	ATTAAT	part of a conserved DNA module involved in light responsiveness
AhERF-40	Box 4	Petroselinum crispum	719	+	6	ATTAAT	part of a conserved DNA module involved in light responsiveness
AhERF-40	Box II	Solanum tuberosum	1106	+	9	TGGTAATAA	part of a light responsive element
AhERF-40	CCAAT-box	Hordeum vulgare	55	+	6	CAACGG	MYBHv1 binding site
AhERF-40	G-box	Arabidopsis thaliana	10	+	6	TACGTG	cis-acting regulatory element involved in light responsiveness
AhERF-40	G-box	Arabidopsis thaliana	306	+	6	TACGTG	cis-acting regulatory element involved in light responsiveness
AhERF-40	G-box	Arabidopsis thaliana	857	-	6	TACGTG	cis-acting regulatory element involved in light responsiveness
AhERF-40	G-box	Brassica napus	305	-	8	CCACGTAA	cis-acting regulatory element involved in light responsiveness
AhERF-40	GATA-motif	Pisum sativum	1464	-	7	GATAGGG	part of a light responsive element
AhERF-40	GT1-motif	Avena sativa	1021	+	7	GGTTAAT	light responsive element
AhERF-40	LTR	Hordeum vulgare	397	-	6	CCGAAA	cis-acting element involved in low-temperature responsiveness
AhERF-40	LTR	Hordeum vulgare	1206	+	6	CCGAAA	cis-acting element involved in low-temperature responsiveness
AhERF-40	O2-site	Zea mays	155	+	9	GATGATGTGG	cis-acting regulatory element involved in zein metabolism regulation
AhERF-40	Sp1	Oryza sativa	259	-	6	GGGCGG	light responsive element
AhERF-40	TC-rich repeats	Nicotiana tabacum	1058	-	9	ATTCTCTAAC	cis-acting element involved in defense and stress responsiveness
AhERF-40	TCT-motif	Arabidopsis thaliana	624	-	6	TCTTAC	part of a light responsive element
AhERF-40	circadian	Lycopersicon esculentum	875	-	9	CAAAGATATC	cis-acting regulatory element involved in circadian control
AhERF-41	ABRE	Arabidopsis thaliana	763	+	5	ACGTG	cis-acting element involved in the abscisic acid responsiveness
AhERF-41	ABRE	Arabidopsis thaliana	619	-	7	TACGGTC	cis-acting element involved in the abscisic acid responsiveness
AhERF-41	ARE	Zea mays	457	+	6	AAACCA	cis-acting regulatory element essential for the anaerobic induction
AhERF-41	AT1-motif	Solanum tuberosum	987	+	13	AATTATTTTTTATT	part of a light responsive module
AhERF-41	AT1-motif	Solanum tuberosum	116	+	13	AATTATTTTTTATT	part of a light responsive module
AhERF-41	AuxRR-core	Nicotiana tabacum	472	-	7	GGTCCAT	cis-acting regulatory element involved in auxin responsiveness
AhERF-41	Box 4	Petroselinum crispum	141	+	6	ATTAAT	part of a conserved DNA module involved in light responsiveness
AhERF-41	Box 4	Petroselinum crispum	975	-	6	ATTAAT	part of a conserved DNA module involved in light responsiveness
AhERF-41	Box 4	Petroselinum crispum	1271	-	6	ATTAAT	part of a conserved DNA module involved in light responsiveness
AhERF-41	G-box	Zea mays	762	-	6	CACGTC	cis-acting regulatory element involved in light responsiveness
AhERF-41	GA-motif	Arabidopsis thaliana	599	-	8	ATAGATAA	part of a light responsive element
AhERF-41	GATA-motif	Solanum tuberosum	816	-	9	AAGGATAAGG	part of a light responsive element
AhERF-41	GATA-motif	Solanum tuberosum	621	-	9	AAGGATAAGG	part of a light responsive element
AhERF-41	LTR	Hordeum vulgare	62	+	6	CCGAAA	cis-acting element involved in low-temperature responsiveness
AhERF-41	MRE	Petroselinum crispum	290	-	7	AACCTAA	MYB binding site involved in light responsiveness
AhERF-41	P-box	Oryza sativa	1136	-	7	CCTTTTG	gibberellin-responsive element
AhERF-41	circadian	Lycopersicon esculentum	1186	-	9	CAAAGATATC	cis-acting regulatory element involved in circadian control
AhERF-42	A-box	Petroselinum crispum	1151	-	6	CCGTCC	cis-acting regulatory element
AhERF-42	ABRE	Arabidopsis thaliana	239	+	7	TACGGTC	cis-acting element involved in the abscisic acid responsiveness
AhERF-42	ABRE	Arabidopsis thaliana	1106	+	5	ACGTG	cis-acting element involved in the abscisic acid responsiveness
AhERF-42	ARE	Zea mays	149	-	6	AAACCA	cis-acting regulatory element essential for the anaerobic induction
AhERF-42	ARE	Zea mays	385	+	6	AAACCA	cis-acting regulatory element essential for the anaerobic induction
AhERF-42	Box 4	Petroselinum crispum	1206	-	6	ATTAAT	part of a conserved DNA module involved in light responsiveness
AhERF-42	Box 4	Petroselinum crispum	331	+	6	ATTAAT	part of a conserved DNA module involved in light responsiveness
AhERF-42	Box II	Solanum tuberosum	1359	-	9	TGGTAATAA	part of a light responsive element
AhERF-42	CGTCA-motif	Hordeum vulgare	24	-	5	CGTCA	cis-acting regulatory element involved in the MeJA-responsiveness
AhERF-42	G-Box	Pisum sativum	1105	-	6	CACGTT	cis-acting regulatory element involved in light responsiveness
AhERF-42	GATA-motif	Arabidopsis thaliana	759	+	7	GATAGGA	part of a light responsive element
AhERF-42	GATA-motif	Pisum sativum	1048	-	7	GATAGGG	part of a light responsive element
AhERF-42	GT1-motif	Arabidopsis thaliana	371	+	6	GGTTAA	light responsive element
AhERF-42	LAMP-element	Pisum sativum	541	-	8	CTTTATCA	part of a light responsive element
AhERF-42	TCT-motif	Arabidopsis thaliana	658	+	6	TCTTAC	part of a light responsive element
AhERF-42	TCT-motif	Arabidopsis thaliana	1339	-	6	TCTTAC	part of a light responsive element
AhERF-42	TGACG-motif	Hordeum vulgare	24	+	5	TGACG	cis-acting regulatory element involved in the MeJA-responsiveness
AhERF-43	A-box	Petroselinum crispum	701	+	6	CCGTCC	cis-acting regulatory element
AhERF-43	ABRE	Arabidopsis thaliana	278	+	5	ACGTG	cis-acting element involved in the abscisic acid responsiveness
AhERF-43	ABRE	Arabidopsis thaliana	269	-	5	ACGTG	cis-acting element involved in the abscisic acid responsiveness
AhERF-43	ABRE	Hordeum vulgare	267	-	9	GCAACGTGTC	cis-acting element involved in the abscisic acid responsiveness
AhERF-43	ABRE	Arabidopsis thaliana	277	+	6	CACGTG	cis-acting element involved in the abscisic acid responsiveness
AhERF-43	AE-box	Arabidopsis thaliana	1218	+	8	AGAAACAA	part of a module for light response
AhERF-43	AT1-motif	Solanum tuberosum	1257	-	13	AATTATTTTTTATT	part of a light responsive module
AhERF-43	ATCT-motif	Pisum sativum	196	+	9	AATCTAATCC	part of a conserved DNA module involved in light responsiveness
AhERF-43	Box 4	Petroselinum crispum	839	-	6	ATTAAT	part of a conserved DNA module involved in light responsiveness
AhERF-43	CGTCA-motif	Hordeum vulgare	1490	-	5	CGTCA	cis-acting regulatory element involved in the MeJA-responsiveness
AhERF-43	CGTCA-motif	Hordeum vulgare	503	+	5	CGTCA	cis-acting regulatory element involved in the MeJA-responsiveness
AhERF-43	G-Box	Pisum sativum	277	+	6	CACGTG	cis-acting regulatory element involved in light responsiveness
AhERF-43	G-Box	Pisum sativum	269	+	6	CACGTT	cis-acting regulatory element involved in light responsiveness
AhERF-43	G-box	Arabidopsis thaliana	277	+	6	CACGTG	cis-acting regulatory element involved in light responsiveness
AhERF-43	G-box	Arabidopsis thaliana	275	-	9	GCCACGTGGA	cis-acting regulatory element involved in light responsiveness
AhERF-43	GCN4_motif	Oryza sativa	209	+	7	TGAGTCA	cis-regulatory element involved in endosperm expression
AhERF-43	GT1-motif	Arabidopsis thaliana	568	-	6	GGTTAA	light responsive element
AhERF-43	LAMP-element	Pisum sativum	1386	+	8	CTTTATCA	part of a light responsive element
AhERF-43	MBS	Arabidopsis thaliana	205	+	6	CAACTG	MYB binding site involved in drought-inducibility
AhERF-43	TGACG-motif	Hordeum vulgare	1490	+	5	TGACG	cis-acting regulatory element involved in the MeJA-responsiveness
AhERF-43	TGACG-motif	Hordeum vulgare	503	-	5	TGACG	cis-acting regulatory element involved in the MeJA-responsiveness
AhERF-44	A-box	Oryza sativa	94	-	12	AATAACAAACTCC	sequence conserved in alpha-amylase promoters
AhERF-44	AACA_motif	Oryza sativa	93	-	11	TAACAAACTCCA	involved in endosperm-specific negative expression
AhERF-44	ABRE	Arabidopsis thaliana	1391	+	5	ACGTG	cis-acting element involved in the abscisic acid responsiveness
AhERF-44	ABRE	Arabidopsis thaliana	1390	-	6	CACGTG	cis-acting element involved in the abscisic acid responsiveness
AhERF-44	ABRE	Arabidopsis thaliana	961	+	5	ACGTG	cis-acting element involved in the abscisic acid responsiveness
AhERF-44	ABRE	Arabidopsis thaliana	1064	+	5	ACGTG	cis-acting element involved in the abscisic acid responsiveness
AhERF-44	AE-box	Arabidopsis thaliana	330	+	8	AGAAACAA	part of a module for light response
AhERF-44	ARE	Zea mays	65	-	6	AAACCA	cis-acting regulatory element essential for the anaerobic induction
AhERF-44	ARE	Zea mays	1013	+	6	AAACCA	cis-acting regulatory element essential for the anaerobic induction
AhERF-44	ARE	Zea mays	964	-	6	AAACCA	cis-acting regulatory element essential for the anaerobic induction
AhERF-44	ARE	Zea mays	1270	-	6	AAACCA	cis-acting regulatory element essential for the anaerobic induction
AhERF-44	AT-rich element	Glycine max	348	+	10	ATAGAAATCAA	binding site of AT-rich DNA binding protein (ATBP-1)
AhERF-44	Box 4	Petroselinum crispum	409	+	6	ATTAAT	part of a conserved DNA module involved in light responsiveness
AhERF-44	Box 4	Petroselinum crispum	104	+	6	ATTAAT	part of a conserved DNA module involved in light responsiveness
AhERF-44	Box 4	Petroselinum crispum	413	+	6	ATTAAT	part of a conserved DNA module involved in light responsiveness
AhERF-44	Box 4	Petroselinum crispum	672	+	6	ATTAAT	part of a conserved DNA module involved in light responsiveness
AhERF-44	Box 4	Petroselinum crispum	131	+	6	ATTAAT	part of a conserved DNA module involved in light responsiveness
AhERF-44	Box 4	Petroselinum crispum	1409	-	6	ATTAAT	part of a conserved DNA module involved in light responsiveness
AhERF-44	Box 4	Petroselinum crispum	116	+	6	ATTAAT	part of a conserved DNA module involved in light responsiveness
AhERF-44	Box 4	Petroselinum crispum	430	+	6	ATTAAT	part of a conserved DNA module involved in light responsiveness
AhERF-44	CAT-box	Arabidopsis thaliana	55	+	6	GCCACT	cis-acting regulatory element related to meristem expression
AhERF-44	CAT-box	Arabidopsis thaliana	1260	+	6	GCCACT	cis-acting regulatory element related to meristem expression
AhERF-44	G-Box	Pisum sativum	1063	-	6	CACGTT	cis-acting regulatory element involved in light responsiveness
AhERF-44	G-Box	Pisum sativum	960	-	6	CACGTT	cis-acting regulatory element involved in light responsiveness
AhERF-44	G-Box	Pisum sativum	1390	-	6	CACGTG	cis-acting regulatory element involved in light responsiveness
AhERF-44	G-box	Arabidopsis thaliana	1390	-	6	CACGTG	cis-acting regulatory element involved in light responsiveness
AhERF-44	TCT-motif	Arabidopsis thaliana	523	-	6	TCTTAC	part of a light responsive element
AhERF-44	TCT-motif	Arabidopsis thaliana	1312	+	6	TCTTAC	part of a light responsive element
AhERF-45	AE-box	Arabidopsis thaliana	667	-	8	AGAAACAA	part of a module for light response
AhERF-45	AT-rich sequence	Pisum sativum	891	+	9	TAAAATACT	element for maximal elicitor-mediated activation (2copies)
AhERF-45	CGTCA-motif	Hordeum vulgare	263	+	5	CGTCA	cis-acting regulatory element involved in the MeJA-responsiveness
AhERF-45	GATA-motif	Solanum tuberosum	1181	+	10	AAGGATAAGG	part of a light responsive element
AhERF-45	GATA-motif	Arabidopsis thaliana	507	-	7	GATAGGA	part of a light responsive element
AhERF-45	I-box	Arabidopsis thaliana	1182	-	9	ccttatcct	part of a light responsive element
AhERF-45	LTR	Hordeum vulgare	137	+	6	CCGAAA	cis-acting element involved in low-temperature responsiveness
AhERF-45	LTR	Hordeum vulgare	491	+	6	CCGAAA	cis-acting element involved in low-temperature responsiveness
AhERF-45	LTR	Hordeum vulgare	18	+	6	CCGAAA	cis-acting element involved in low-temperature responsiveness
AhERF-45	O2-site	Zea mays	287	-	9	GATGACATGG	cis-acting regulatory element involved in zein metabolism regulation
AhERF-45	TC-rich repeats	Nicotiana tabacum	63	-	9	ATTCTCTAAC	cis-acting element involved in defense and stress responsiveness
AhERF-45	TCT-motif	Arabidopsis thaliana	1284	-	6	TCTTAC	part of a light responsive element
AhERF-45	TGACG-motif	Hordeum vulgare	263	-	5	TGACG	cis-acting regulatory element involved in the MeJA-responsiveness
AhERF-46	A-box	Petroselinum crispum	1437	-	6	CCGTCC	cis-acting regulatory element
AhERF-46	ABRE	Arabidopsis thaliana	1036	-	5	ACGTG	cis-acting element involved in the abscisic acid responsiveness
AhERF-46	ABRE	Triticum aestivum	1034	-	9	GACACGTGGC	cis-acting element involved in the abscisic acid responsiveness
AhERF-46	ACE	Petroselinum crispum	1301	+	9	CTAACGTATT	cis-acting element involved in light responsiveness
AhERF-46	ACE	Petroselinum crispum	588	-	9	CTAACGTATT	cis-acting element involved in light responsiveness
AhERF-46	ACE	Petroselinum crispum	1416	-	9	CTAACGTATT	cis-acting element involved in light responsiveness
AhERF-46	AT-rich element	Glycine max	1467	+	10	ATAGAAATCAA	binding site of AT-rich DNA binding protein (ATBP-1)
AhERF-46	AT1-motif	Solanum tuberosum	487	+	13	AATTATTTTTTATT	part of a light responsive module
AhERF-46	Box 4	Petroselinum crispum	1229	-	6	ATTAAT	part of a conserved DNA module involved in light responsiveness
AhERF-46	Box 4	Petroselinum crispum	393	+	6	ATTAAT	part of a conserved DNA module involved in light responsiveness
AhERF-46	Box 4	Petroselinum crispum	988	-	6	ATTAAT	part of a conserved DNA module involved in light responsiveness
AhERF-46	Box 4	Petroselinum crispum	386	+	6	ATTAAT	part of a conserved DNA module involved in light responsiveness
AhERF-46	Box II	Solanum tuberosum	838	-	9	TGGTAATAA	part of a light responsive element
AhERF-46	Box II	Solanum tuberosum	883	-	9	TGGTAATAA	part of a light responsive element
AhERF-46	CGTCA-motif	Hordeum vulgare	1387	-	5	CGTCA	cis-acting regulatory element involved in the MeJA-responsiveness
AhERF-46	G-box	Zea mays	1036	+	6	CACGTC	cis-acting regulatory element involved in light responsiveness
AhERF-46	GATA-motif	Arabidopsis thaliana	1482	-	10	AAGATAAGATT	part of a light responsive element
AhERF-46	GCN4_motif	Oryza sativa	1345	-	7	TGAGTCA	cis-regulatory element involved in endosperm expression
AhERF-46	GT1-motif	Solanum tuberosum	768	-	9	GTGTGTGAA	light responsive element
AhERF-46	TATC-box	Oryza sativa	1122	-	7	TATCCCA	cis-acting element involved in gibberellin-responsiveness
AhERF-46	TC-rich repeats	Nicotiana tabacum	1421	-	9	ATTCTCTAAC	cis-acting element involved in defense and stress responsiveness
AhERF-46	TC-rich repeats	Nicotiana tabacum	593	-	9	GTTTTCTTAC	cis-acting element involved in defense and stress responsiveness
AhERF-46	TGA-element	Brassica oleracea	577	-	6	AACGAC	auxin-responsive element
AhERF-46	TGACG-motif	Hordeum vulgare	1387	+	5	TGACG	cis-acting regulatory element involved in the MeJA-responsiveness
AhERF-47	ABRE	Arabidopsis thaliana	893	+	5	ACGTG	cis-acting element involved in the abscisic acid responsiveness
AhERF-47	ABRE	Arabidopsis thaliana	892	-	6	CACGTG	cis-acting element involved in the abscisic acid responsiveness
AhERF-47	ABRE	Arabidopsis thaliana	1342	-	5	ACGTG	cis-acting element involved in the abscisic acid responsiveness
AhERF-47	AE-box	Arabidopsis thaliana	1219	-	8	AGAAACTT	part of a module for light response
AhERF-47	CAT-box	Arabidopsis thaliana	946	+	6	GCCACT	cis-acting regulatory element related to meristem expression
AhERF-47	CCAAT-box	Hordeum vulgare	983	+	6	CAACGG	MYBHv1 binding site
AhERF-47	CGTCA-motif	Hordeum vulgare	896	-	5	CGTCA	cis-acting regulatory element involved in the MeJA-responsiveness
AhERF-47	G-Box	Pisum sativum	1342	+	6	CACGTT	cis-acting regulatory element involved in light responsiveness
AhERF-47	G-Box	Pisum sativum	892	-	6	CACGTG	cis-acting regulatory element involved in light responsiveness
AhERF-47	G-box	Arabidopsis thaliana	892	-	6	CACGTG	cis-acting regulatory element involved in light responsiveness
AhERF-47	GARE-motif	Brassica oleracea	856	+	7	TCTGTTG	gibberellin-responsive element
AhERF-47	LTR	Hordeum vulgare	1184	-	6	CCGAAA	cis-acting element involved in low-temperature responsiveness
AhERF-47	TATC-box	Oryza sativa	293	+	7	TATCCCA	cis-acting element involved in gibberellin-responsiveness
AhERF-47	TGACG-motif	Hordeum vulgare	896	+	5	TGACG	cis-acting regulatory element involved in the MeJA-responsiveness
AhERF-48	AACA_motif	Oryza sativa	143	+	11	TAACAAACTCCA	involved in endosperm-specific negative expression
AhERF-48	ABRE	Arabidopsis thaliana	1223	-	6	CACGTG	cis-acting element involved in the abscisic acid responsiveness
AhERF-48	ABRE	Arabidopsis thaliana	280	+	5	ACGTG	cis-acting element involved in the abscisic acid responsiveness
AhERF-48	ABRE	Arabidopsis thaliana	1224	+	5	ACGTG	cis-acting element involved in the abscisic acid responsiveness
AhERF-48	ABRE	Arabidopsis thaliana	1334	-	5	ACGTG	cis-acting element involved in the abscisic acid responsiveness
AhERF-48	AE-box	Arabidopsis thaliana	197	+	8	AGAAACAA	part of a module for light response
AhERF-48	ARE	Zea mays	1217	+	6	AAACCA	cis-acting regulatory element essential for the anaerobic induction
AhERF-48	AuxRR-core	Nicotiana tabacum	1340	+	7	GGTCCAT	cis-acting regulatory element involved in auxin responsiveness
AhERF-48	Box 4	Petroselinum crispum	141	+	6	ATTAAT	part of a conserved DNA module involved in light responsiveness
AhERF-48	Box 4	Petroselinum crispum	861	-	6	ATTAAT	part of a conserved DNA module involved in light responsiveness
AhERF-48	Box 4	Petroselinum crispum	447	+	6	ATTAAT	part of a conserved DNA module involved in light responsiveness
AhERF-48	CAT-box	Arabidopsis thaliana	1262	+	6	GCCACT	cis-acting regulatory element related to meristem expression
AhERF-48	G-Box	Pisum sativum	1334	+	6	CACGTT	cis-acting regulatory element involved in light responsiveness
AhERF-48	G-Box	Pisum sativum	1223	-	6	CACGTG	cis-acting regulatory element involved in light responsiveness
AhERF-48	G-box	Arabidopsis thaliana	279	+	6	TACGTG	cis-acting regulatory element involved in light responsiveness
AhERF-48	G-box	Arabidopsis thaliana	1223	-	6	CACGTG	cis-acting regulatory element involved in light responsiveness
AhERF-48	GATA-motif	Pisum sativum	333	+	7	GATAGGG	part of a light responsive element
AhERF-48	GT1-motif	Arabidopsis thaliana	625	-	6	GGTTAA	light responsive element
AhERF-48	I-box	Helianthus annuus	790	+	10	atGATAAGGTC	part of a light responsive element
AhERF-48	LTR	Hordeum vulgare	1418	-	6	CCGAAA	cis-acting element involved in low-temperature responsiveness
AhERF-48	LTR	Hordeum vulgare	739	+	6	CCGAAA	cis-acting element involved in low-temperature responsiveness
AhERF-48	LTR	Hordeum vulgare	998	-	6	CCGAAA	cis-acting element involved in low-temperature responsiveness
AhERF-48	RY-element	Helianthus annuus	800	-	8	CATGCATG	cis-acting regulatory element involved in seed-specific regulation
AhERF-48	chs-CMA1a	Daucus carota	188	-	8	TTACTTAA	part of a light responsive element
AhERF-49	Box 4	Petroselinum crispum	1199	-	6	ATTAAT	part of a conserved DNA module involved in light responsiveness
AhERF-49	Box 4	Petroselinum crispum	378	+	6	ATTAAT	part of a conserved DNA module involved in light responsiveness
AhERF-49	CAT-box	Arabidopsis thaliana	1001	-	6	GCCACT	cis-acting regulatory element related to meristem expression
AhERF-49	CAT-box	Arabidopsis thaliana	957	-	6	GCCACT	cis-acting regulatory element related to meristem expression
AhERF-49	GA-motif	Arabidopsis thaliana	295	+	8	ATAGATAA	part of a light responsive element
AhERF-49	GA-motif	Arabidopsis thaliana	512	+	8	ATAGATAA	part of a light responsive element
AhERF-49	MRE	Petroselinum crispum	1286	+	7	AACCTAA	MYB binding site involved in light responsiveness
AhERF-49	TC-rich repeats	Nicotiana tabacum	970	-	9	ATTCTCTAAC	cis-acting element involved in defense and stress responsiveness
AhERF-49	TCT-motif	Arabidopsis thaliana	901	-	6	TCTTAC	part of a light responsive element
AhERF-49	chs-CMA1a	Daucus carota	226	-	8	TTACTTAA	part of a light responsive element
AhERF-50	ABRE	Arabidopsis thaliana	229	-	5	ACGTG	cis-acting element involved in the abscisic acid responsiveness
AhERF-50	Box 4	Petroselinum crispum	968	-	6	ATTAAT	part of a conserved DNA module involved in light responsiveness
AhERF-50	Box 4	Petroselinum crispum	368	+	6	ATTAAT	part of a conserved DNA module involved in light responsiveness
AhERF-50	Box 4	Petroselinum crispum	461	+	6	ATTAAT	part of a conserved DNA module involved in light responsiveness
AhERF-50	Box 4	Petroselinum crispum	98	+	6	ATTAAT	part of a conserved DNA module involved in light responsiveness
AhERF-50	Box 4	Petroselinum crispum	945	-	6	ATTAAT	part of a conserved DNA module involved in light responsiveness
AhERF-50	CGTCA-motif	Hordeum vulgare	143	-	5	CGTCA	cis-acting regulatory element involved in the MeJA-responsiveness
AhERF-50	CGTCA-motif	Hordeum vulgare	1407	-	5	CGTCA	cis-acting regulatory element involved in the MeJA-responsiveness
AhERF-50	G-Box	Pisum sativum	229	+	6	CACGTT	cis-acting regulatory element involved in light responsiveness
AhERF-50	GATA-motif	Pisum sativum	716	+	7	GATAGGG	part of a light responsive element
AhERF-50	GATA-motif	Arabidopsis thaliana	730	-	7	GATAGGA	part of a light responsive element
AhERF-50	GATA-motif	Pisum sativum	248	-	7	GATAGGG	part of a light responsive element
AhERF-50	GC-motif	Zea mays	1107	-	6	CCCCCG	enhancer-like element involved in anoxic specific inducibility
AhERF-50	GT1-motif	Arabidopsis thaliana	328	-	6	GGTTAA	light responsive element
AhERF-50	I-box	Zea mays	676	-	9	gGATAAGGTG	part of a light responsive element
AhERF-50	TCT-motif	Arabidopsis thaliana	1390	+	6	TCTTAC	part of a light responsive element
AhERF-50	TCT-motif	Arabidopsis thaliana	1356	+	6	TCTTAC	part of a light responsive element
AhERF-50	TGACG-motif	Hordeum vulgare	143	+	5	TGACG	cis-acting regulatory element involved in the MeJA-responsiveness
AhERF-50	TGACG-motif	Hordeum vulgare	1407	+	5	TGACG	cis-acting regulatory element involved in the MeJA-responsiveness
AhERF-51	ABRE	Arabidopsis thaliana	1170	+	5	ACGTG	cis-acting element involved in the abscisic acid responsiveness
AhERF-51	ABRE	Arabidopsis thaliana	1169	-	6	CACGTG	cis-acting element involved in the abscisic acid responsiveness
AhERF-51	ABRE	Arabidopsis thaliana	737	-	5	ACGTG	cis-acting element involved in the abscisic acid responsiveness
AhERF-51	Box 4	Petroselinum crispum	277	+	6	ATTAAT	part of a conserved DNA module involved in light responsiveness
AhERF-51	CGTCA-motif	Hordeum vulgare	1117	-	5	CGTCA	cis-acting regulatory element involved in the MeJA-responsiveness
AhERF-51	CGTCA-motif	Hordeum vulgare	1120	+	5	CGTCA	cis-acting regulatory element involved in the MeJA-responsiveness
AhERF-51	G-Box	Pisum sativum	1169	-	6	CACGTG	cis-acting regulatory element involved in light responsiveness
AhERF-51	G-box	Zea mays	271	+	6	CACGAC	cis-acting regulatory element involved in light responsiveness
AhERF-51	G-box	Zea mays	737	+	6	CACGTC	cis-acting regulatory element involved in light responsiveness
AhERF-51	G-box	Arabidopsis thaliana	1169	-	6	CACGTG	cis-acting regulatory element involved in light responsiveness
AhERF-51	GC-motif	Zea mays	592	-	6	CCCCCG	enhancer-like element involved in anoxic specific inducibility
AhERF-51	LAMP-element	Pisum sativum	804	+	8	CTTTATCA	part of a light responsive element
AhERF-51	MRE	Petroselinum crispum	1405	+	7	AACCTAA	MYB binding site involved in light responsiveness
AhERF-51	MRE	Petroselinum crispum	896	+	7	AACCTAA	MYB binding site involved in light responsiveness
AhERF-51	TCA-element	Nicotiana tabacum	467	-	9	CCATCTTTTT	cis-acting element involved in salicylic acid responsiveness
AhERF-51	TCA-element	Nicotiana tabacum	758	+	9	CCATCTTTTT	cis-acting element involved in salicylic acid responsiveness
AhERF-51	TCA-element	Nicotiana tabacum	582	-	9	CCATCTTTTT	cis-acting element involved in salicylic acid responsiveness
AhERF-51	TGACG-motif	Hordeum vulgare	1120	-	5	TGACG	cis-acting regulatory element involved in the MeJA-responsiveness
AhERF-51	TGACG-motif	Hordeum vulgare	1117	+	5	TGACG	cis-acting regulatory element involved in the MeJA-responsiveness
AhERF-51	chs-CMA1a	Daucus carota	110	+	8	TTACTTAA	part of a light responsive element
AhERF-52	ABRE	Arabidopsis thaliana	634	+	6	CACGTG	cis-acting element involved in the abscisic acid responsiveness
AhERF-52	ABRE	Arabidopsis thaliana	285	-	5	ACGTG	cis-acting element involved in the abscisic acid responsiveness
AhERF-52	ABRE	Arabidopsis thaliana	666	+	5	ACGTG	cis-acting element involved in the abscisic acid responsiveness
AhERF-52	ABRE	Hordeum vulgare	283	-	9	GCAACGTGTC	cis-acting element involved in the abscisic acid responsiveness
AhERF-52	ABRE	Arabidopsis thaliana	141	-	5	ACGTG	cis-acting element involved in the abscisic acid responsiveness
AhERF-52	ABRE	Arabidopsis thaliana	665	+	6	CACGTG	cis-acting element involved in the abscisic acid responsiveness
AhERF-52	ABRE	Hordeum vulgare	663	+	9	CGCACGTGTC	cis-acting element involved in the abscisic acid responsiveness
AhERF-52	ABRE	Arabidopsis thaliana	692	+	5	ACGTG	cis-acting element involved in the abscisic acid responsiveness
AhERF-52	ABRE	Arabidopsis thaliana	635	+	5	ACGTG	cis-acting element involved in the abscisic acid responsiveness
AhERF-52	AT-rich sequence	Pisum sativum	424	+	9	TAAAATACT	element for maximal elicitor-mediated activation (2copies)
AhERF-52	Box 4	Petroselinum crispum	741	+	6	ATTAAT	part of a conserved DNA module involved in light responsiveness
AhERF-52	Box 4	Petroselinum crispum	1283	-	6	ATTAAT	part of a conserved DNA module involved in light responsiveness
AhERF-52	CAT-box	Arabidopsis thaliana	1322	+	6	GCCACT	cis-acting regulatory element related to meristem expression
AhERF-52	G-Box	Pisum sativum	665	+	6	CACGTG	cis-acting regulatory element involved in light responsiveness
AhERF-52	G-Box	Pisum sativum	285	+	6	CACGTT	cis-acting regulatory element involved in light responsiveness
AhERF-52	G-Box	Pisum sativum	634	+	6	CACGTG	cis-acting regulatory element involved in light responsiveness
AhERF-52	G-box	Arabidopsis thaliana	665	+	6	CACGTG	cis-acting regulatory element involved in light responsiveness
AhERF-52	G-box	Arabidopsis thaliana	141	-	6	TACGTG	cis-acting regulatory element involved in light responsiveness
AhERF-52	G-box	Arabidopsis thaliana	634	+	6	CACGTG	cis-acting regulatory element involved in light responsiveness
AhERF-52	G-box	Arabidopsis thaliana	691	+	6	TACGTG	cis-acting regulatory element involved in light responsiveness
AhERF-52	GATA-motif	Arabidopsis thaliana	1419	-	7	GATAGGA	part of a light responsive element
AhERF-52	GCN4_motif	Oryza sativa	593	+	7	TGAGTCA	cis-regulatory element involved in endosperm expression
AhERF-52	GT1-motif	Arabidopsis thaliana	421	+	6	GGTTAA	light responsive element
AhERF-52	I-box	Larix laricina	41	+	9	GTATAAGGCC	part of a light responsive element
AhERF-52	MBS	Arabidopsis thaliana	871	-	6	CAACTG	MYB binding site involved in drought-inducibility
AhERF-52	P-box	Oryza sativa	650	+	7	CCTTTTG	gibberellin-responsive element
AhERF-52	TCCC-motif	Spinacia oleracea	1092	+	7	TCTCCCT	part of a light responsive element
AhERF-52	TCT-motif	Arabidopsis thaliana	235	-	6	TCTTAC	part of a light responsive element
AhERF-52	TGA-element	Brassica oleracea	670	-	6	AACGAC	auxin-responsive element
AhERF-53	ABRE	Arabidopsis thaliana	67	+	5	ACGTG	cis-acting element involved in the abscisic acid responsiveness
AhERF-53	ABRE	Arabidopsis thaliana	1288	-	6	CACGTG	cis-acting element involved in the abscisic acid responsiveness
AhERF-53	ABRE	Arabidopsis thaliana	1289	+	5	ACGTG	cis-acting element involved in the abscisic acid responsiveness
AhERF-53	ACE	Petroselinum crispum	1293	+	9	GACACGTATG	cis-acting element involved in light responsiveness
AhERF-53	G-Box	Pisum sativum	1288	-	6	CACGTG	cis-acting regulatory element involved in light responsiveness
AhERF-53	G-box	Zea mays	1353	+	6	CACGAC	cis-acting regulatory element involved in light responsiveness
AhERF-53	G-box	Arabidopsis thaliana	1288	-	6	CACGTG	cis-acting regulatory element involved in light responsiveness
AhERF-53	G-box	Arabidopsis thaliana	66	+	6	TACGTG	cis-acting regulatory element involved in light responsiveness
AhERF-53	GATA-motif	Solanum tuberosum	224	+	9	AAGGATAAGG	part of a light responsive element
AhERF-53	I-box	Triticum aestivum	159	+	8	AGATAAGG	part of a light responsive element
AhERF-53	MBS	Arabidopsis thaliana	109	-	6	CAACTG	MYB binding site involved in drought-inducibility
AhERF-53	MBSI	Petunia hybrida	229	-	10.5	aaaAaaC(G/C)GTTA	MYB binding site involved in flavonoid biosynthetic genes regulation
AhERF-53	TATC-box	Oryza sativa	665	+	7	TATCCCA	cis-acting element involved in gibberellin-responsiveness
AhERF-53	TCA-element	Nicotiana tabacum	865	+	9	CCATCTTTTT	cis-acting element involved in salicylic acid responsiveness
AhERF-53	TGA-element	Brassica oleracea	330	-	6	AACGAC	auxin-responsive element
AhERF-54	ABRE	Arabidopsis thaliana	201	+	5	ACGTG	cis-acting element involved in the abscisic acid responsiveness
AhERF-54	AT-rich element	Glycine max	717	-	10	ATAGAAATCAA	binding site of AT-rich DNA binding protein (ATBP-1)
AhERF-54	Box 4	Petroselinum crispum	269	+	6	ATTAAT	part of a conserved DNA module involved in light responsiveness
AhERF-54	Box 4	Petroselinum crispum	1052	-	6	ATTAAT	part of a conserved DNA module involved in light responsiveness
AhERF-54	Box 4	Petroselinum crispum	881	-	6	ATTAAT	part of a conserved DNA module involved in light responsiveness
AhERF-54	Box 4	Petroselinum crispum	299	+	6	ATTAAT	part of a conserved DNA module involved in light responsiveness
AhERF-54	G-Box	Pisum sativum	200	-	6	CACGTT	cis-acting regulatory element involved in light responsiveness
AhERF-54	GT1-motif	Avena sativa	822	+	7	GGTTAAT	light responsive element
AhERF-54	GT1-motif	Arabidopsis thaliana	793	-	6	GGTTAA	light responsive element
AhERF-54	TCA-element	Nicotiana tabacum	546	-	9	CCATCTTTTT	cis-acting element involved in salicylic acid responsiveness
AhERF-54	TCT-motif	Arabidopsis thaliana	579	-	6	TCTTAC	part of a light responsive element
AhERF-55	ARE	Zea mays	1128	-	6	AAACCA	cis-acting regulatory element essential for the anaerobic induction
AhERF-55	ARE	Zea mays	1236	-	6	AAACCA	cis-acting regulatory element essential for the anaerobic induction
AhERF-55	ARE	Zea mays	953	-	6	AAACCA	cis-acting regulatory element essential for the anaerobic induction
AhERF-55	ATCT-motif	Pisum sativum	1002	-	9	AATCTAATCC	part of a conserved DNA module involved in light responsiveness
AhERF-55	Box 4	Petroselinum crispum	342	+	6	ATTAAT	part of a conserved DNA module involved in light responsiveness
AhERF-55	Box 4	Petroselinum crispum	762	-	6	ATTAAT	part of a conserved DNA module involved in light responsiveness
AhERF-55	Box 4	Petroselinum crispum	172	+	6	ATTAAT	part of a conserved DNA module involved in light responsiveness
AhERF-55	Box 4	Petroselinum crispum	841	-	6	ATTAAT	part of a conserved DNA module involved in light responsiveness
AhERF-55	CGTCA-motif	Hordeum vulgare	1314	+	5	CGTCA	cis-acting regulatory element involved in the MeJA-responsiveness
AhERF-55	LS7	Zea mays	866	+	13	CAGATTTATTTTTA	part of a light responsive element
AhERF-55	TCA-element	Nicotiana tabacum	605	-	9	CCATCTTTTT	cis-acting element involved in salicylic acid responsiveness
AhERF-55	TCT-motif	Arabidopsis thaliana	852	-	6	TCTTAC	part of a light responsive element
AhERF-55	TGACG-motif	Hordeum vulgare	1314	-	5	TGACG	cis-acting regulatory element involved in the MeJA-responsiveness
AhERF-56	ARE	Zea mays	1432	-	6	AAACCA	cis-acting regulatory element essential for the anaerobic induction
AhERF-56	Box 4	Petroselinum crispum	736	+	6	ATTAAT	part of a conserved DNA module involved in light responsiveness
AhERF-56	Box 4	Petroselinum crispum	563	+	6	ATTAAT	part of a conserved DNA module involved in light responsiveness
AhERF-56	Box 4	Petroselinum crispum	234	+	6	ATTAAT	part of a conserved DNA module involved in light responsiveness
AhERF-56	Box 4	Petroselinum crispum	938	-	6	ATTAAT	part of a conserved DNA module involved in light responsiveness
AhERF-56	Box 4	Petroselinum crispum	515	+	6	ATTAAT	part of a conserved DNA module involved in light responsiveness
AhERF-56	Box 4	Petroselinum crispum	1152	-	6	ATTAAT	part of a conserved DNA module involved in light responsiveness
AhERF-56	Box 4	Petroselinum crispum	986	-	6	ATTAAT	part of a conserved DNA module involved in light responsiveness
AhERF-56	GT1-motif	Avena sativa	900	-	7	GGTTAAT	light responsive element
AhERF-56	GT1-motif	Arabidopsis thaliana	901	-	6	GGTTAA	light responsive element
AhERF-56	MBS	Arabidopsis thaliana	599	-	6	CAACTG	MYB binding site involved in drought-inducibility
AhERF-57	ABRE	Arabidopsis thaliana	1040	-	5	ACGTG	cis-acting element involved in the abscisic acid responsiveness
AhERF-57	ACA-motif	Arabidopsis thaliana	1230	-	12	AATCACAACCATA	part of gapA in (gapA-CMA1) involved with light responsiveness
AhERF-57	ARE	Zea mays	1026	+	6	AAACCA	cis-acting regulatory element essential for the anaerobic induction
AhERF-57	AT1-motif	Solanum tuberosum	78	-	13	AATTATTTTTTATT	part of a light responsive module
AhERF-57	Box 4	Petroselinum crispum	359	+	6	ATTAAT	part of a conserved DNA module involved in light responsiveness
AhERF-57	Box 4	Petroselinum crispum	806	-	6	ATTAAT	part of a conserved DNA module involved in light responsiveness
AhERF-57	Box 4	Petroselinum crispum	918	-	6	ATTAAT	part of a conserved DNA module involved in light responsiveness
AhERF-57	Box 4	Petroselinum crispum	391	+	6	ATTAAT	part of a conserved DNA module involved in light responsiveness
AhERF-57	Box 4	Petroselinum crispum	638	+	6	ATTAAT	part of a conserved DNA module involved in light responsiveness
AhERF-57	Box 4	Petroselinum crispum	854	-	6	ATTAAT	part of a conserved DNA module involved in light responsiveness
AhERF-57	Box 4	Petroselinum crispum	894	-	6	ATTAAT	part of a conserved DNA module involved in light responsiveness
AhERF-57	G-box	Brassica oleracea	1037	+	9	TAACACGTAG	cis-acting regulatory element involved in light responsiveness
AhERF-57	G-box	Arabidopsis thaliana	1040	-	6	TACGTG	cis-acting regulatory element involved in light responsiveness
AhERF-57	GA-motif	Arabidopsis thaliana	245	-	8	ATAGATAA	part of a light responsive element
AhERF-57	GT1-motif	Avena sativa	474	+	7	GGTTAAT	light responsive element
AhERF-57	MBSI	Petunia hybrida	1199	-	10.5	aaaAaaC(G/C)GTTA	MYB binding site involved in flavonoid biosynthetic genes regulation
AhERF-57	MRE	Petroselinum crispum	135	-	7	AACCTAA	MYB binding site involved in light responsiveness
AhERF-57	TCCC-motif	Spinacia oleracea	1479	+	7	TCTCCCT	part of a light responsive element
AhERF-57	TCT-motif	Arabidopsis thaliana	1057	+	6	TCTTAC	part of a light responsive element
AhERF-57	circadian	Lycopersicon esculentum	1455	+	9	CAAAGATATC	cis-acting regulatory element involved in circadian control
AhERF-58	A-box	Petroselinum crispum	1298	-	6	CCGTCC	cis-acting regulatory element
AhERF-58	ABRE	Arabidopsis thaliana	224	+	5	ACGTG	cis-acting element involved in the abscisic acid responsiveness
AhERF-58	ARE	Zea mays	1176	+	6	AAACCA	cis-acting regulatory element essential for the anaerobic induction
AhERF-58	Box 4	Petroselinum crispum	103	+	6	ATTAAT	part of a conserved DNA module involved in light responsiveness
AhERF-58	Box 4	Petroselinum crispum	57	+	6	ATTAAT	part of a conserved DNA module involved in light responsiveness
AhERF-58	Box 4	Petroselinum crispum	816	-	6	ATTAAT	part of a conserved DNA module involved in light responsiveness
AhERF-58	CAT-box	Arabidopsis thaliana	1283	+	6	GCCACT	cis-acting regulatory element related to meristem expression
AhERF-58	G-Box	Pisum sativum	223	-	6	CACGTT	cis-acting regulatory element involved in light responsiveness
AhERF-58	MRE	Petroselinum crispum	253	-	7	AACCTAA	MYB binding site involved in light responsiveness
AhERF-58	TCA-element	Nicotiana tabacum	454	+	9	CCATCTTTTT	cis-acting element involved in salicylic acid responsiveness
AhERF-58	circadian	Lycopersicon esculentum	1225	+	9	CAAAGATATC	cis-acting regulatory element involved in circadian control
AhERF-59	ABRE	Arabidopsis thaliana	334	+	6	CACGTG	cis-acting element involved in the abscisic acid responsiveness
AhERF-59	ABRE	Arabidopsis thaliana	335	+	5	ACGTG	cis-acting element involved in the abscisic acid responsiveness
AhERF-59	ARE	Zea mays	160	-	6	AAACCA	cis-acting regulatory element essential for the anaerobic induction
AhERF-59	ARE	Zea mays	1379	-	6	AAACCA	cis-acting regulatory element essential for the anaerobic induction
AhERF-59	ATC-motif	Spinacia oleracea	445	+	8	AGTAATCT	part of a conserved DNA module involved in light responsiveness
AhERF-59	ATCT-motif	Pisum sativum	24	-	9	AATCTAATCC	part of a conserved DNA module involved in light responsiveness
AhERF-59	Box 4	Petroselinum crispum	280	+	6	ATTAAT	part of a conserved DNA module involved in light responsiveness
AhERF-59	Box 4	Petroselinum crispum	1054	-	6	ATTAAT	part of a conserved DNA module involved in light responsiveness
AhERF-59	Box 4	Petroselinum crispum	619	+	6	ATTAAT	part of a conserved DNA module involved in light responsiveness
AhERF-59	Box 4	Petroselinum crispum	760	-	6	ATTAAT	part of a conserved DNA module involved in light responsiveness
AhERF-59	Box 4	Petroselinum crispum	615	+	6	ATTAAT	part of a conserved DNA module involved in light responsiveness
AhERF-59	G-Box	Pisum sativum	334	+	6	CACGTG	cis-acting regulatory element involved in light responsiveness
AhERF-59	G-box	Arabidopsis thaliana	334	+	6	CACGTG	cis-acting regulatory element involved in light responsiveness
AhERF-59	Gap-box	Arabidopsis thaliana	1255	-	9.5	CAAATGAA(A/G)A	part of a light responsive element
AhERF-59	HD-Zip 3	Arabidopsis thaliana	703	+	9.5	GTAAT(G/C)ATTAC	protein binding site
AhERF-59	LS7	Zea mays	1036	+	13	CAGATTTATTTTTA	part of a light responsive element
AhERF-59	LTR	Hordeum vulgare	62	-	6	CCGAAA	cis-acting element involved in low-temperature responsiveness
AhERF-59	LTR	Hordeum vulgare	43	+	6	CCGAAA	cis-acting element involved in low-temperature responsiveness
AhERF-59	TCCC-motif	Spinacia oleracea	131	-	7	TCTCCCT	part of a light responsive element
AhERF-59	TCT-motif	Arabidopsis thaliana	569	+	6	TCTTAC	part of a light responsive element
AhERF-59	TGA-element	Brassica oleracea	263	-	6	AACGAC	auxin-responsive element
AhERF-60	ABRE	Arabidopsis thaliana	1029	-	5	ACGTG	cis-acting element involved in the abscisic acid responsiveness
AhERF-60	ARE	Zea mays	1046	+	6	AAACCA	cis-acting regulatory element essential for the anaerobic induction
AhERF-60	ARE	Zea mays	285	-	6	AAACCA	cis-acting regulatory element essential
AhERF-60	AT1-motif	Solanum tuberosum	1375	+	13	AATTATTTTTTATT	part of a light responsive module
AhERF-60	Box 4	Petroselinum crispum	884	-	6	ATTAAT	part of a conserved DNA module involved in light responsiveness
AhERF-60	Box 4	Petroselinum crispum	976	-	6	ATTAAT	part of a conserved DNA module involved in light responsiveness
AhERF-60	Box 4	Petroselinum crispum	512	+	6	ATTAAT	part of a conserved DNA module involved in light responsiveness
AhERF-60	Box 4	Petroselinum crispum	1392	-	6	ATTAAT	part of a conserved DNA module involved in light responsiveness
AhERF-60	Box 4	Petroselinum crispum	559	+	6	ATTAAT	part of a conserved DNA module involved in light responsiveness
AhERF-60	Box 4	Petroselinum crispum	904	-	6	ATTAAT	part of a conserved DNA module involved in light responsiveness
AhERF-60	Box 4	Petroselinum crispum	1183	-	6	ATTAAT	part of a conserved DNA module involved in light responsiveness
AhERF-60	Box 4	Petroselinum crispum	407	+	6	ATTAAT	part of a conserved DNA module involved in light responsiveness
AhERF-60	Box 4	Petroselinum crispum	656	+	6	ATTAAT	part of a conserved DNA module involved in light responsiveness
AhERF-60	G-box	Arabidopsis thaliana	1029	-	6	TACGTG	cis-acting regulatory element involved in light responsiveness
AhERF-60	GATA-motif	Arabidopsis thaliana	382	-	10	AAGATAAGATT	part of a light responsive element
AhERF-60	GT1-motif	Avena sativa	987	+	7	GGTTAAT	light responsive element
AhERF-60	TCT-motif	Arabidopsis thaliana	805	+	6	TCTTAC	part of a light responsive element
AhERF-60	chs-CMA2a	Petroselinum crispum	312	+	8	TCACTTGA	part of a light responsive element
AhERF-61	ARE	Zea mays	556	+	6	AAACCA	cis-acting regulatory element essential for the anaerobic induction
AhERF-61	ARE	Zea mays	511	-	6	AAACCA	cis-acting regulatory element essential for the anaerobic induction
AhERF-61	ARE	Zea mays	879	-	6	AAACCA	cis-acting regulatory element essential for the anaerobic induction
AhERF-61	CGTCA-motif	Hordeum vulgare	1472	+	5	CGTCA	cis-acting regulatory element involved in the MeJA-responsiveness
AhERF-61	CGTCA-motif	Hordeum vulgare	1428	-	5	CGTCA	cis-acting regulatory element involved in the MeJA-responsiveness
AhERF-61	GARE-motif	Brassica oleracea	1349	-	7	TCTGTTG	gibberellin-responsive element
AhERF-61	GTGGC-motif	Arabidopsis thaliana	1158	-	10	CATCGTGTGGC	part of a light responsive element
AhERF-61	I-box	Larix laricina	1326	+	9	GTATAAGGCC	part of a light responsive element
AhERF-61	O2-site	Zea mays	1270	-	9	GATGACATGG	cis-acting regulatory element involved in zein metabolism regulation
AhERF-61	O2-site	Zea mays	78	-	9	GATGATGTGG	cis-acting regulatory element involved in zein metabolism regulation
AhERF-61	TCA-element	Nicotiana tabacum	1193	-	9	CCATCTTTTT	cis-acting element involved in salicylic acid responsiveness
AhERF-61	TCCC-motif	Spinacia oleracea	686	+	7	TCTCCCT	part of a light responsive element
AhERF-61	TCT-motif	Arabidopsis thaliana	1071	-	6	TCTTAC	part of a light responsive element
AhERF-61	TGACG-motif	Hordeum vulgare	1428	+	5	TGACG	cis-acting regulatory element involved in the MeJA-responsiveness
AhERF-61	TGACG-motif	Hordeum vulgare	1472	-	5	TGACG	cis-acting regulatory element involved in the MeJA-responsiveness
AhERF-62	ABRE	Arabidopsis thaliana	1392	-	5	ACGTG	cis-acting element involved in the abscisic acid responsiveness
AhERF-62	ABRE	Arabidopsis thaliana	858	+	5	ACGTG	cis-acting element involved in the abscisic acid responsiveness
AhERF-62	ABRE	Arabidopsis thaliana	857	-	6	CACGTG	cis-acting element involved in the abscisic acid responsiveness
AhERF-62	ABRE	Arabidopsis thaliana	1225	+	5	ACGTG	cis-acting element involved in the abscisic acid responsiveness
AhERF-62	ARE	Zea mays	268	-	6	AAACCA	cis-acting regulatory element essential for the anaerobic induction
AhERF-62	ARE	Zea mays	12	-	6	AAACCA	cis-acting regulatory element essential for the anaerobic induction
AhERF-62	AT-rich element	Glycine max	1327	-	10	ATAGAAATCAA	binding site of AT-rich DNA binding protein (ATBP-1)
AhERF-62	Box 4	Petroselinum crispum	1275	-	6	ATTAAT	part of a conserved DNA module involved in light responsiveness
AhERF-62	Box 4	Petroselinum crispum	294	+	6	ATTAAT	part of a conserved DNA module involved in light responsiveness
AhERF-62	Box 4	Petroselinum crispum	745	+	6	ATTAAT	part of a conserved DNA module involved in light responsiveness
AhERF-62	G-Box	Pisum sativum	857	-	6	CACGTG	cis-acting regulatory element involved in light responsiveness
AhERF-62	G-box	Arabidopsis thaliana	1392	-	6	TACGTG	cis-acting regulatory element involved in light responsiveness
AhERF-62	G-box	Arabidopsis thaliana	1224	+	6	TACGTG	cis-acting regulatory element involved in light responsiveness
AhERF-62	G-box	Arabidopsis thaliana	857	-	6	CACGTG	cis-acting regulatory element involved in light responsiveness
AhERF-62	GT1-motif	Solanum tuberosum	122	+	9	GTGTGTGAA	light responsive element
AhERF-62	MBS	Arabidopsis thaliana	1456	-	6	CAACTG	MYB binding site involved in drought-inducibility
AhERF-62	P-box	Oryza sativa	519	+	7	CCTTTTG	gibberellin-responsive element
AhERF-62	TC-rich repeats	Nicotiana tabacum	1217	+	9	GTTTTCTTAC	cis-acting element involved in defense and stress responsiveness
AhERF-62	TCCC-motif	Spinacia oleracea	1299	+	7	TCTCCCT	part of a light responsive element
AhERF-62	TCCC-motif	Spinacia oleracea	473	+	7	TCTCCCT	part of a light responsive element
AhERF-62	TCT-motif	Arabidopsis thaliana	1221	+	6	TCTTAC	part of a light responsive element
AhERF-62	TCT-motif	Arabidopsis thaliana	728	-	6	TCTTAC	part of a light responsive element
AhERF-62	TGA-element	Brassica oleracea	141	-	6	AACGAC	auxin-responsive element
AhERF-63	3-AF1 binding site	Solanum tuberosum	1122	-	10	TAAGAGAGGAA	light responsive element
AhERF-63	AE-box	Arabidopsis thaliana	1012	+	8	AGAAACTT	part of a module for light response
AhERF-63	AT1-motif	Solanum tuberosum	341	+	13	AATTATTTTTTATT	part of a light responsive module
AhERF-63	Box 4	Petroselinum crispum	509	+	6	ATTAAT	part of a conserved DNA module involved in light responsiveness
AhERF-63	Box 4	Petroselinum crispum	305	+	6	ATTAAT	part of a conserved DNA module involved in light responsiveness
AhERF-63	Box 4	Petroselinum crispum	479	+	6	ATTAAT	part of a conserved DNA module involved in light responsiveness
AhERF-63	Box 4	Petroselinum crispum	657	+	6	ATTAAT	part of a conserved DNA module involved in light responsiveness
AhERF-63	CGTCA-motif	Hordeum vulgare	1466	+	5	CGTCA	cis-acting regulatory element involved in the MeJA-responsiveness
AhERF-63	GT1-motif	Arabidopsis thaliana	1395	-	6	GGTTAA	light responsive element
AhERF-63	I-box	Larix laricina	288	+	9	GTATAAGGCC	part of a light responsive element
AhERF-63	O2-site	Zea mays	1487	-	9	GATGATGTGG	cis-acting regulatory element involved in zein metabolism regulation
AhERF-63	TC-rich repeats	Nicotiana tabacum	553	-	9	ATTCTCTAAC	cis-acting element involved in defense and stress responsiveness
AhERF-63	TC-rich repeats	Nicotiana tabacum	269	-	9	GTTTTCTTAC	cis-acting element involved in defense and stress responsiveness
AhERF-63	TCT-motif	Arabidopsis thaliana	934	+	6	TCTTAC	part of a light responsive element
AhERF-63	TGACG-motif	Hordeum vulgare	1466	-	5	TGACG	cis-acting regulatory element involved in the MeJA-responsiveness
AhERF-64	A-box	Petroselinum crispum	715	+	6	CCGTCC	cis-acting regulatory element
AhERF-64	ABRE	Arabidopsis thaliana	150	-	7	TACGGTC	cis-acting element involved in the abscisic acid responsiveness
AhERF-64	ABRE	Arabidopsis thaliana	1071	-	5	ACGTG	cis-acting element involved in the abscisic acid responsiveness
AhERF-64	ABRE	Arabidopsis thaliana	703	+	5	ACGTG	cis-acting element involved in the abscisic acid responsiveness
AhERF-64	ARE	Zea mays	980	+	6	AAACCA	cis-acting regulatory element essential for the anaerobic induction
AhERF-64	ATCT-motif	Pisum sativum	390	-	9	AATCTAATCC	part of a conserved DNA module involved in light responsiveness
AhERF-64	Box 4	Petroselinum crispum	103	+	6	ATTAAT	part of a conserved DNA module involved in light responsiveness
AhERF-64	Box 4	Petroselinum crispum	94	+	6	ATTAAT	part of a conserved DNA module involved in light responsiveness
AhERF-64	Box 4	Petroselinum crispum	852	-	6	ATTAAT	part of a conserved DNA module involved in light responsiveness
AhERF-64	CGTCA-motif	Hordeum vulgare	130	+	5	CGTCA	cis-acting regulatory element involved in the MeJA-responsiveness
AhERF-64	CGTCA-motif	Hordeum vulgare	512	-	5	CGTCA	cis-acting regulatory element involved in the MeJA-responsiveness
AhERF-64	CGTCA-motif	Hordeum vulgare	384	+	5	CGTCA	cis-acting regulatory element involved in the MeJA-responsiveness
AhERF-64	G-Box	Pisum sativum	702	-	6	CACGTT	cis-acting regulatory element involved in light responsiveness
AhERF-64	G-box	Arabidopsis thaliana	1071	-	6	TACGTG	cis-acting regulatory element involved in light responsiveness
AhERF-64	GCN4_motif	Oryza sativa	335	-	7	TGAGTCA	cis-regulatory element involved in endosperm expression
AhERF-64	LTR	Hordeum vulgare	679	-	6	CCGAAA	cis-acting element involved in low-temperature responsiveness
AhERF-64	MBS	Arabidopsis thaliana	139	-	6	CAACTG	MYB binding site involved in drought-inducibility
AhERF-64	O2-site	Zea mays	359	+	8	GATGA(C/T)(A/G)TG(A/G)	cis-acting regulatory element involved in zein metabolism regulation
AhERF-64	TGACG-motif	Hordeum vulgare	512	+	5	TGACG	cis-acting regulatory element involved in the MeJA-responsiveness
AhERF-64	TGACG-motif	Hordeum vulgare	130	-	5	TGACG	cis-acting regulatory element involved in the MeJA-responsiveness
AhERF-64	TGACG-motif	Hordeum vulgare	384	-	5	TGACG	cis-acting regulatory element involved in the MeJA-responsiveness
AhERF-65	3-AF3 binding site	Pisum sativum	1216	-	10	CACTATCTAAC	part of a conserved DNA module array (CMA3)
AhERF-65	ABRE	Arabidopsis thaliana	308	+	5	ACGTG	cis-acting element involved in the abscisic acid responsiveness
AhERF-65	ABRE	Oryza sativa	307	+	8	TACGTGTC	cis-acting element involved in the abscisic acid responsiveness
AhERF-65	ACE	Petroselinum crispum	1300	+	9	GACACGTATG	cis-acting element involved in light responsiveness
AhERF-65	AT-rich sequence	Pisum sativum	994	-	9	TAAAATACT	element for maximal elicitor-mediated activation (2copies)
AhERF-65	AT1-motif	Solanum tuberosum	837	+	13	AATTATTTTTTATT	part of a light responsive module
AhERF-65	Box 4	Petroselinum crispum	1349	-	6	ATTAAT	part of a conserved DNA module involved in light responsiveness
AhERF-65	G-box	Arabidopsis thaliana	307	+	6	TACGTG	cis-acting regulatory element involved in light responsiveness
AhERF-65	GATA-motif	Arabidopsis thaliana	406	-	7	GATAGGA	part of a light responsive element
AhERF-65	GT1-motif	Avena sativa	435	+	7	GGTTAAT	light responsive element
AhERF-65	GT1-motif	Solanum tuberosum	957	+	9	GTGTGTGAA	light responsive element
AhERF-65	MBS	Arabidopsis thaliana	96	-	6	CAACTG	MYB binding site involved in drought-inducibility
AhERF-65	MRE	Petroselinum crispum	432	-	7	AACCTAA	MYB binding site involved in light responsiveness
AhERF-65	TCA-element	Nicotiana tabacum	870	+	9	CCATCTTTTT	cis-acting element involved in salicylic acid responsiveness
AhERF-65	TCCC-motif	Spinacia oleracea	1285	-	7	TCTCCCT	part of a light responsive element
AhERF-65	TCT-motif	Arabidopsis thaliana	776	+	6	TCTTAC	part of a light responsive element
AhERF-65	TGA-element	Brassica oleracea	385	-	6	AACGAC	auxin-responsive element
AhERF-66	ARE	Zea mays	961	-	6	AAACCA	cis-acting regulatory element essential for the anaerobic induction
AhERF-66	Box 4	Petroselinum crispum	203	+	6	ATTAAT	part of a conserved DNA module involved in light responsiveness
AhERF-66	Box 4	Petroselinum crispum	389	+	6	ATTAAT	part of a conserved DNA module involved in light responsiveness
AhERF-66	Box 4	Petroselinum crispum	735	+	6	ATTAAT	part of a conserved DNA module involved in light responsiveness
AhERF-66	Box 4	Petroselinum crispum	1234	-	6	ATTAAT	part of a conserved DNA module involved in light responsiveness
AhERF-66	CCAAT-box	Hordeum vulgare	670	-	6	CAACGG	MYBHv1 binding site
AhERF-66	CGTCA-motif	Hordeum vulgare	1436	-	5	CGTCA	cis-acting regulatory element involved in the MeJA-responsiveness
AhERF-66	GA-motif	Arabidopsis thaliana	312	+	8	ATAGATAA	part of a light responsive element
AhERF-66	GATA-motif	Pisum sativum	712	+	7	GATAGGG	part of a light responsive element
AhERF-66	GT1-motif	Arabidopsis thaliana	909	-	6	GGTTAA	light responsive element
AhERF-66	I-box	Flaveria trinervia	53	-	10	cCATATCCAAT	part of a light responsive element
AhERF-66	LAMP-element	Pisum sativum	506	+	8	CTTTATCA	part of a light responsive element
AhERF-66	MRE	Petroselinum crispum	820	+	7	AACCTAA	MYB binding site involved in light responsiveness
AhERF-66	TC-rich repeats	Nicotiana tabacum	1357	-	9	GTTTTCTTAC	cis-acting element involved in defense and stress responsiveness
AhERF-66	TCA-element	Nicotiana tabacum	951	+	9	CCATCTTTTT	cis-acting element involved in salicylic acid responsiveness
AhERF-66	TCT-motif	Arabidopsis thaliana	581	-	6	TCTTAC	part of a light responsive element
AhERF-66	TGACG-motif	Hordeum vulgare	1436	+	5	TGACG	cis-acting regulatory element involved in the MeJA-responsiveness
AhERF-66	chs-CMA1a	Daucus carota	1203	-	8	TTACTTAA	part of a light responsive element
AhERF-66	chs-CMA1a	Daucus carota	196	-	8	TTACTTAA	part of a light responsive element
AhERF-67	ARE	Zea mays	1106	-	6	AAACCA	cis-acting regulatory element essential for the anaerobic induction
[truncated: 1,557 more rows]

[truncated: 2 more sheets: Table S11, Table S12]
